# Supplementary material for: The molecular structure and curious motions in 1,1-difluorosilacyclopent-3-ene and silacyclopent-3-ene as determined by microwave spectroscopy and quantum chemical calculations
Source: Royal Society of Chemistry journal article supplement (doi:10.1039/d1cp04286f), 2022-01-01
Supplement: d1cp04286f1.log [file d1cp04286f1.log]

 Entering Gaussian System, Link 0=g16
 Initial command:
 /share/apps/Gaussian/g16_b01/g16/l1.exe "/work/162857.vici.chem.tamu.edu/Gau-7194.inp" -scrdir="/work/162857.vici.chem.tamu.edu/"
 Default is to use a total of  16 processors:
                               16 via shared-memory
                                1 via Linda
 Entering Link 1 = /share/apps/Gaussian/g16_b01/g16/l1.exe PID=      7195.
  
 Copyright (c) 1988-2017, Gaussian, Inc.  All Rights Reserved.
  
 This is part of the Gaussian(R) 16 program.  It is based on
 the Gaussian(R) 09 system (copyright 2009, Gaussian, Inc.),
 the Gaussian(R) 03 system (copyright 2003, Gaussian, Inc.),
 the Gaussian(R) 98 system (copyright 1998, Gaussian, Inc.),
 the Gaussian(R) 94 system (copyright 1995, Gaussian, Inc.),
 the Gaussian 92(TM) system (copyright 1992, Gaussian, Inc.),
 the Gaussian 90(TM) system (copyright 1990, Gaussian, Inc.),
 the Gaussian 88(TM) system (copyright 1988, Gaussian, Inc.),
 the Gaussian 86(TM) system (copyright 1986, Carnegie Mellon
 University), and the Gaussian 82(TM) system (copyright 1983,
 Carnegie Mellon University). Gaussian is a federally registered
 trademark of Gaussian, Inc.
  
 This software contains proprietary and confidential information,
 including trade secrets, belonging to Gaussian, Inc.
  
 This software is provided under written license and may be
 used, copied, transmitted, or stored only in accord with that
 written license.
  
 The following legend is applicable only to US Government
 contracts under FAR:
  
                    RESTRICTED RIGHTS LEGEND
  
 Use, reproduction and disclosure by the US Government is
 subject to restrictions as set forth in subparagraphs (a)
 and (c) of the Commercial Computer Software - Restricted
 Rights clause in FAR 52.227-19.
  
 Gaussian, Inc.
 340 Quinnipiac St., Bldg. 40, Wallingford CT 06492
  
  
 ---------------------------------------------------------------
 Warning -- This program may not be used in any manner that
 competes with the business of Gaussian, Inc. or will provide
 assistance to any competitor of Gaussian, Inc.  The licensee
 of this program is prohibited from giving any competitor of
 Gaussian, Inc. access to this program.  By using this program,
 the user acknowledges that Gaussian, Inc. is engaged in the
 business of creating and licensing software in the field of
 computational chemistry and represents and warrants to the
 licensee that it is not a competitor of Gaussian, Inc. and that
 it will not use this program in any manner prohibited above.
 ---------------------------------------------------------------
  

 Cite this work as:
 Gaussian 16, Revision B.01,
 M. J. Frisch, G. W. Trucks, H. B. Schlegel, G. E. Scuseria, 
 M. A. Robb, J. R. Cheeseman, G. Scalmani, V. Barone, 
 G. A. Petersson, H. Nakatsuji, X. Li, M. Caricato, A. V. Marenich, 
 J. Bloino, B. G. Janesko, R. Gomperts, B. Mennucci, H. P. Hratchian, 
 J. V. Ortiz, A. F. Izmaylov, J. L. Sonnenberg, D. Williams-Young, 
 F. Ding, F. Lipparini, F. Egidi, J. Goings, B. Peng, A. Petrone, 
 T. Henderson, D. Ranasinghe, V. G. Zakrzewski, J. Gao, N. Rega, 
 G. Zheng, W. Liang, M. Hada, M. Ehara, K. Toyota, R. Fukuda, 
 J. Hasegawa, M. Ishida, T. Nakajima, Y. Honda, O. Kitao, H. Nakai, 
 T. Vreven, K. Throssell, J. A. Montgomery, Jr., J. E. Peralta, 
 F. Ogliaro, M. J. Bearpark, J. J. Heyd, E. N. Brothers, K. N. Kudin, 
 V. N. Staroverov, T. A. Keith, R. Kobayashi, J. Normand, 
 K. Raghavachari, A. P. Rendell, J. C. Burant, S. S. Iyengar, 
 J. Tomasi, M. Cossi, J. M. Millam, M. Klene, C. Adamo, R. Cammi, 
 J. W. Ochterski, R. L. Martin, K. Morokuma, O. Farkas, 
 J. B. Foresman, and D. J. Fox, Gaussian, Inc., Wallingford CT, 2016.
 
 ******************************************
 Gaussian 16:  EM64L-G16RevB.01 20-Dec-2017
                 1-Jul-2019 
 ******************************************
 %chk=FFSip_C2vRccsdtzVici.chk
 ------------------------------------------------------
 #p opt ccsd/cc-pvtz pop=full geom=connectivity gfprint
 ------------------------------------------------------
 1/18=20,19=15,38=1,57=2/1,3;
 2/9=110,12=2,17=6,18=5,40=1/2;
 3/5=16,6=1,11=9,24=100,25=1,30=1,71=1/1,2,3;
 4//1;
 5/5=2,38=5/2;
 8/6=4,9=120000,10=1/1,4;
 9/5=7,15=1/13;
 11/28=-8,29=200,42=3/11;
 10/5=6/2;
 6/7=3/1;
 7/12=7/1,2,3,16;
 1/18=20,19=15/3(2);
 2/9=110/2;
 99//99;
 2/9=110/2;
 3/5=16,6=1,11=9,25=1,30=1,71=1/1,2,3;
 4/5=5,16=3,69=1/1;
 5/5=2,38=5/2;
 8/6=4,9=120000,10=1/1,4;
 9/5=7,15=1/13;
 11/28=-8,29=200,42=3/11;
 10/5=6/2;
 7/12=7/1,2,3,16;
 1/18=20,19=15/3(-9);
 2/9=110/2;
 6/7=3/1;
 99/9=10/99;
 Leave Link    1 at Mon Jul  1 14:19:23 2019, MaxMem=           0 cpu:               5.5 elap:               0.4
 (Enter /share/apps/Gaussian/g16_b01/g16/l101.exe)
 --------
 SiF2C4H6
 --------
 Symbolic Z-matrix:
 Charge =  0 Multiplicity = 1
 C
 H                    1    B1
 H                    1    B2       2    A1
 H                    1    B3       2    A2       3    D1       0
 H                    1    B4       2    A3       3    D2       0
 C                    1    B5       2    A4       3    D3       0
 C                    6    B6       1    A5       2    D4       0
 H                    7    B7       6    A6       1    -180.     0
 C                    7    B8       6    A7       1     0.       0
 H                    9    B9       7    A8       6    -180.     0
 Si                   6    B10      1    A9       9     180.     0
 F                    11   B11      6    A10      1    D5       0
 F                    11   B12      6    A11      1    D6       0
       Variables:
  B1                    1.09101                  
  B2                    1.09101                  
  B3                    3.59154                  
  B4                    3.59154                  
  B5                    2.83832                  
  B6                    1.51709                  
  B7                    1.08266                  
  B8                    1.34006                  
  B9                    1.08266                  
  B10                   1.86927                  
  B11                   1.59477                  
  B12                   1.59477                  
  A1                  106.80421                  
  A2                  139.93246                  
  A3                  111.94366                  
  A4                  126.14365                  
  A5                   60.40978                  
  A6                  119.64795                  
  A7                  119.59022                  
  A8                  120.76183                  
  A9                   40.60575                  
  A10                 113.23426                  
  A11                 113.23426                  
  D1                 -164.90462                  
  D2                 -169.58786                  
  D3                 -169.58786                  
  D4                  -96.18556                  
  D5                 -120.0517                   
  D6                  120.0517                   
 
 ITRead=  0  0  0  0  0  0  0  0  0  0  0  0  0
 MicOpt= -1 -1 -1 -1 -1 -1 -1 -1 -1 -1 -1 -1 -1
 NAtoms=     13 NQM=       13 NQMF=       0 NMMI=      0 NMMIF=      0
                NMic=       0 NMicF=      0.
                    Isotopes and Nuclear Properties:
 (Nuclear quadrupole moments (NQMom) in fm**2, nuclear magnetic moments (NMagM)
  in nuclear magnetons)

  Atom         1           2           3           4           5           6           7           8           9          10
 IAtWgt=          12           1           1           1           1          12          12           1          12           1
 AtmWgt=  12.0000000   1.0078250   1.0078250   1.0078250   1.0078250  12.0000000  12.0000000   1.0078250  12.0000000   1.0078250
 NucSpn=           0           1           1           1           1           0           0           1           0           1
 AtZEff=  -0.0000000  -0.0000000  -0.0000000  -0.0000000  -0.0000000  -0.0000000  -0.0000000  -0.0000000  -0.0000000  -0.0000000
 NQMom=    0.0000000   0.0000000   0.0000000   0.0000000   0.0000000   0.0000000   0.0000000   0.0000000   0.0000000   0.0000000
 NMagM=    0.0000000   2.7928460   2.7928460   2.7928460   2.7928460   0.0000000   0.0000000   2.7928460   0.0000000   2.7928460
 AtZNuc=   6.0000000   1.0000000   1.0000000   1.0000000   1.0000000   6.0000000   6.0000000   1.0000000   6.0000000   1.0000000

  Atom        11          12          13
 IAtWgt=          28          19          19
 AtmWgt=  27.9769284  18.9984033  18.9984033
 NucSpn=           0           1           1
 AtZEff=  -0.0000000  -0.0000000  -0.0000000
 NQMom=    0.0000000   0.0000000   0.0000000
 NMagM=    0.0000000   2.6288670   2.6288670
 AtZNuc=  14.0000000   9.0000000   9.0000000
 Leave Link  101 at Mon Jul  1 14:19:24 2019, MaxMem=  7340032000 cpu:              14.0 elap:               1.0
 (Enter /share/apps/Gaussian/g16_b01/g16/l103.exe)

 GradGradGradGradGradGradGradGradGradGradGradGradGradGradGradGradGradGrad
 Berny optimization.
 Initialization pass.
                           ----------------------------
                           !    Initial Parameters    !
                           ! (Angstroms and Degrees)  !
 --------------------------                            --------------------------
 ! Name  Definition              Value          Derivative Info.                !
 --------------------------------------------------------------------------------
 ! R1    R(1,2)                  1.091          estimate D2E/DX2                !
 ! R2    R(1,3)                  1.091          estimate D2E/DX2                !
 ! R3    R(1,9)                  1.5171         estimate D2E/DX2                !
 ! R4    R(1,11)                 1.8693         estimate D2E/DX2                !
 ! R5    R(4,6)                  1.091          estimate D2E/DX2                !
 ! R6    R(5,6)                  1.091          estimate D2E/DX2                !
 ! R7    R(6,7)                  1.5171         estimate D2E/DX2                !
 ! R8    R(6,11)                 1.8693         estimate D2E/DX2                !
 ! R9    R(7,8)                  1.0827         estimate D2E/DX2                !
 ! R10   R(7,9)                  1.3401         estimate D2E/DX2                !
 ! R11   R(9,10)                 1.0827         estimate D2E/DX2                !
 ! R12   R(11,12)                1.5948         estimate D2E/DX2                !
 ! R13   R(11,13)                1.5948         estimate D2E/DX2                !
 ! A1    A(2,1,3)              106.8042         estimate D2E/DX2                !
 ! A2    A(2,1,9)              111.5251         estimate D2E/DX2                !
 ! A3    A(2,1,11)             113.0265         estimate D2E/DX2                !
 ! A4    A(3,1,9)              111.5251         estimate D2E/DX2                !
 ! A5    A(3,1,11)             113.0265         estimate D2E/DX2                !
 ! A6    A(9,1,11)             101.0155         estimate D2E/DX2                !
 ! A7    A(4,6,5)              106.8042         estimate D2E/DX2                !
 ! A8    A(4,6,7)              111.5251         estimate D2E/DX2                !
 ! A9    A(4,6,11)             113.0265         estimate D2E/DX2                !
 ! A10   A(5,6,7)              111.5251         estimate D2E/DX2                !
 ! A11   A(5,6,11)             113.0265         estimate D2E/DX2                !
 ! A12   A(7,6,11)             101.0155         estimate D2E/DX2                !
 ! A13   A(6,7,8)              119.648          estimate D2E/DX2                !
 ! A14   A(6,7,9)              119.5902         estimate D2E/DX2                !
 ! A15   A(8,7,9)              120.7618         estimate D2E/DX2                !
 ! A16   A(1,9,7)              119.5902         estimate D2E/DX2                !
 ! A17   A(1,9,10)             119.648          estimate D2E/DX2                !
 ! A18   A(7,9,10)             120.7618         estimate D2E/DX2                !
 ! A19   A(1,11,6)              98.7885         estimate D2E/DX2                !
 ! A20   A(1,11,12)            113.2343         estimate D2E/DX2                !
 ! A21   A(1,11,13)            113.2343         estimate D2E/DX2                !
 ! A22   A(6,11,12)            113.2343         estimate D2E/DX2                !
 ! A23   A(6,11,13)            113.2343         estimate D2E/DX2                !
 ! A24   A(12,11,13)           105.3815         estimate D2E/DX2                !
 ! D1    D(2,1,9,7)            120.3415         estimate D2E/DX2                !
 ! D2    D(2,1,9,10)           -59.6585         estimate D2E/DX2                !
 ! D3    D(3,1,9,7)           -120.3415         estimate D2E/DX2                !
 ! D4    D(3,1,9,10)            59.6585         estimate D2E/DX2                !
 ! D5    D(11,1,9,7)             0.0            estimate D2E/DX2                !
 ! D6    D(11,1,9,10)          180.0            estimate D2E/DX2                !
 ! D7    D(2,1,11,6)          -119.2678         estimate D2E/DX2                !
 ! D8    D(2,1,11,12)            0.7839         estimate D2E/DX2                !
 ! D9    D(2,1,11,13)          120.6805         estimate D2E/DX2                !
 ! D10   D(3,1,11,6)           119.2678         estimate D2E/DX2                !
 ! D11   D(3,1,11,12)         -120.6805         estimate D2E/DX2                !
 ! D12   D(3,1,11,13)           -0.7839         estimate D2E/DX2                !
 ! D13   D(9,1,11,6)             0.0            estimate D2E/DX2                !
 ! D14   D(9,1,11,12)          120.0517         estimate D2E/DX2                !
 ! D15   D(9,1,11,13)         -120.0517         estimate D2E/DX2                !
 ! D16   D(4,6,7,8)            -59.6585         estimate D2E/DX2                !
 ! D17   D(4,6,7,9)            120.3415         estimate D2E/DX2                !
 ! D18   D(5,6,7,8)             59.6585         estimate D2E/DX2                !
 ! D19   D(5,6,7,9)           -120.3415         estimate D2E/DX2                !
 ! D20   D(11,6,7,8)          -180.0            estimate D2E/DX2                !
 ! D21   D(11,6,7,9)             0.0            estimate D2E/DX2                !
 ! D22   D(4,6,11,1)          -119.2678         estimate D2E/DX2                !
 ! D23   D(4,6,11,12)          120.6805         estimate D2E/DX2                !
 ! D24   D(4,6,11,13)            0.7839         estimate D2E/DX2                !
 ! D25   D(5,6,11,1)           119.2678         estimate D2E/DX2                !
 ! D26   D(5,6,11,12)           -0.7839         estimate D2E/DX2                !
 ! D27   D(5,6,11,13)         -120.6805         estimate D2E/DX2                !
 ! D28   D(7,6,11,1)             0.0            estimate D2E/DX2                !
 ! D29   D(7,6,11,12)         -120.0517         estimate D2E/DX2                !
 ! D30   D(7,6,11,13)          120.0517         estimate D2E/DX2                !
 ! D31   D(6,7,9,1)              0.0            estimate D2E/DX2                !
 ! D32   D(6,7,9,10)           180.0            estimate D2E/DX2                !
 ! D33   D(8,7,9,1)            180.0            estimate D2E/DX2                !
 ! D34   D(8,7,9,10)             0.0            estimate D2E/DX2                !
 --------------------------------------------------------------------------------
 Trust Radius=3.00D-01 FncErr=1.00D-07 GrdErr=1.00D-07 EigMax=2.50D+02 EigMin=1.00D-04
 Number of steps in this run=     81 maximum allowed number of steps=    100.
 GradGradGradGradGradGradGradGradGradGradGradGradGradGradGradGradGradGrad

 Leave Link  103 at Mon Jul  1 14:19:25 2019, MaxMem=  7340032000 cpu:               0.7 elap:               0.1
 (Enter /share/apps/Gaussian/g16_b01/g16/l202.exe)
                          Input orientation:                          
 ---------------------------------------------------------------------
 Center     Atomic      Atomic             Coordinates (Angstroms)
 Number     Number       Type             X           Y           Z
 ---------------------------------------------------------------------
      1          6           0        0.000000    0.000000    0.000000
      2          1           0        0.000000    0.000000    1.091006
      3          1           0        1.044418    0.000000   -0.315412
      4          1           0       -2.232067    0.602065   -2.748558
      5          1           0       -3.276485    0.602065   -1.342140
      6          6           0       -2.254313    0.414237   -1.674072
      7          6           0       -1.813896   -1.000201   -1.347015
      8          1           0       -2.362716   -1.839755   -1.754573
      9          6           0       -0.749566   -1.195775   -0.556634
     10          1           0       -0.418761   -2.196963   -0.310976
     11         14           0       -0.984606    1.410705   -0.731177
     12          9           0       -1.627584    2.366970    0.371283
     13          9           0       -0.115110    2.366970   -1.665422
 ---------------------------------------------------------------------
                    Distance matrix (angstroms):
                    1          2          3          4          5
     1  C    0.000000
     2  H    1.091006   0.000000
     3  H    1.091006   1.751805   0.000000
     4  H    3.591542   4.481836   4.125292   0.000000
     5  H    3.591542   4.125292   4.481836   1.751805   0.000000
     6  C    2.838316   3.591542   3.591542   1.091006   1.091006
     7  C    2.470844   3.199151   3.199151   2.169434   2.169434
     8  H    3.470685   4.130913   4.130913   2.639614   2.639614
     9  C    1.517092   2.169434   2.169434   3.199151   3.199151
    10  H    2.258033   2.639614   2.639614   4.130913   4.130913
    11  Si   1.869266   2.505970   2.505970   2.505970   2.505970
    12  F    2.896451   2.961348   3.635065   3.635065   2.961348
    13  F    2.896451   3.635065   2.961348   2.961348   3.635065
                    6          7          8          9         10
     6  C    0.000000
     7  C    1.517092   0.000000
     8  H    2.258033   1.082663   0.000000
     9  C    2.470844   1.340056   2.109981   0.000000
    10  H    3.470685   2.109981   2.447556   1.082663   0.000000
    11  Si   1.869266   2.622869   3.675870   2.622869   3.675870
    12  F    2.896451   3.784851   4.770348   3.784851   4.770348
    13  F    2.896451   3.784851   4.770348   3.784851   4.770348
                   11         12         13
    11  Si   0.000000
    12  F    1.594767   0.000000
    13  F    1.594767   2.536877   0.000000
 Stoichiometry    C4H6F2Si
 Framework group  C2V[C2(Si),SGV(C4H2),SGV'(F2),X(H4)]
 Deg. of freedom    11
 Full point group                 C2V     NOp   4
 Largest Abelian subgroup         C2V     NOp   4
 Largest concise Abelian subgroup C2V     NOp   4
                         Standard orientation:                         
 ---------------------------------------------------------------------
 Center     Atomic      Atomic             Coordinates (Angstroms)
 Number     Number       Type             X           Y           Z
 ---------------------------------------------------------------------
      1          6           0       -0.000000    1.419158   -0.586782
      2          1           0        0.875902    2.062646   -0.491852
      3          1           0       -0.875902    2.062646   -0.491852
      4          1           0       -0.875902   -2.062646   -0.491852
      5          1           0        0.875902   -2.062646   -0.491852
      6          6           0       -0.000000   -1.419158   -0.586782
      7          6           0        0.000000   -0.670028   -1.906014
      8          1           0        0.000000   -1.223778   -2.836347
      9          6           0        0.000000    0.670028   -1.906014
     10          1           0        0.000000    1.223778   -2.836347
     11         14           0        0.000000    0.000000    0.629830
     12          9           0        1.268439   -0.000000    1.596446
     13          9           0       -1.268439    0.000000    1.596446
 ---------------------------------------------------------------------
 Rotational constants (GHZ):           3.5216107           1.7804706           1.6908014
 Leave Link  202 at Mon Jul  1 14:19:25 2019, MaxMem=  7340032000 cpu:               0.4 elap:               0.1
 (Enter /share/apps/Gaussian/g16_b01/g16/l301.exe)
 Standard basis: CC-pVTZ (5D, 7F)
 Ernie: Thresh=  0.10000D-02 Tol=  0.10000D-05 Strict=F.
 Ernie:  30 primitive shells out of 264 were deleted.
 AO basis set (Overlap normalization):
 Atom C1       Shell     1 S   7     bf    1 -     1         -0.000000000000          2.681819945116         -1.108857485707
      0.8236000000D+04  0.5419783203D-03
      0.1235000000D+04  0.4192873817D-02
      0.2808000000D+03  0.2152216205D-01
      0.7927000000D+02  0.8353432195D-01
      0.2559000000D+02  0.2395828457D+00
      0.8997000000D+01  0.4428528419D+00
      0.3319000000D+01  0.3517995618D+00
 Atom C1       Shell     2 S   6     bf    2 -     2         -0.000000000000          2.681819945116         -1.108857485707
      0.2808000000D+03 -0.5949224937D-04
      0.7927000000D+02 -0.1148158310D-02
      0.2559000000D+02 -0.1001913745D-01
      0.8997000000D+01 -0.6121949230D-01
      0.3319000000D+01 -0.1732698541D+00
      0.3643000000D+00  0.1072915192D+01
 Atom C1       Shell     3 S   1     bf    3 -     3         -0.000000000000          2.681819945116         -1.108857485707
      0.9059000000D+00  0.1000000000D+01
 Atom C1       Shell     4 S   1     bf    4 -     4         -0.000000000000          2.681819945116         -1.108857485707
      0.1285000000D+00  0.1000000000D+01
 Atom C1       Shell     5 P   3     bf    5 -     7         -0.000000000000          2.681819945116         -1.108857485707
      0.1871000000D+02  0.3942638716D-01
      0.4133000000D+01  0.2440889849D+00
      0.1200000000D+01  0.8154920089D+00
 Atom C1       Shell     6 P   1     bf    8 -    10         -0.000000000000          2.681819945116         -1.108857485707
      0.3827000000D+00  0.1000000000D+01
 Atom C1       Shell     7 P   1     bf   11 -    13         -0.000000000000          2.681819945116         -1.108857485707
      0.1209000000D+00  0.1000000000D+01
 Atom C1       Shell     8 D   1     bf   14 -    18         -0.000000000000          2.681819945116         -1.108857485707
      0.1097000000D+01  0.1000000000D+01
 Atom C1       Shell     9 D   1     bf   19 -    23         -0.000000000000          2.681819945116         -1.108857485707
      0.3180000000D+00  0.1000000000D+01
 Atom C1       Shell    10 F   1     bf   24 -    30         -0.000000000000          2.681819945116         -1.108857485707
      0.7610000000D+00  0.1000000000D+01
 Atom H2       Shell    11 S   3     bf   31 -    31          1.655215560789          3.897836035029         -0.929465459483
      0.3387000000D+02  0.2549486323D-01
      0.5095000000D+01  0.1903627659D+00
      0.1159000000D+01  0.8521620222D+00
 Atom H2       Shell    12 S   1     bf   32 -    32          1.655215560789          3.897836035029         -0.929465459483
      0.3258000000D+00  0.1000000000D+01
 Atom H2       Shell    13 S   1     bf   33 -    33          1.655215560789          3.897836035029         -0.929465459483
      0.1027000000D+00  0.1000000000D+01
 Atom H2       Shell    14 P   1     bf   34 -    36          1.655215560789          3.897836035029         -0.929465459483
      0.1407000000D+01  0.1000000000D+01
 Atom H2       Shell    15 P   1     bf   37 -    39          1.655215560789          3.897836035029         -0.929465459483
      0.3880000000D+00  0.1000000000D+01
 Atom H2       Shell    16 D   1     bf   40 -    44          1.655215560789          3.897836035029         -0.929465459483
      0.1057000000D+01  0.1000000000D+01
 Atom H3       Shell    17 S   3     bf   45 -    45         -1.655215560789          3.897836035029         -0.929465459483
      0.3387000000D+02  0.2549486323D-01
      0.5095000000D+01  0.1903627659D+00
      0.1159000000D+01  0.8521620222D+00
 Atom H3       Shell    18 S   1     bf   46 -    46         -1.655215560789          3.897836035029         -0.929465459483
      0.3258000000D+00  0.1000000000D+01
 Atom H3       Shell    19 S   1     bf   47 -    47         -1.655215560789          3.897836035029         -0.929465459483
      0.1027000000D+00  0.1000000000D+01
 Atom H3       Shell    20 P   1     bf   48 -    50         -1.655215560789          3.897836035029         -0.929465459483
      0.1407000000D+01  0.1000000000D+01
 Atom H3       Shell    21 P   1     bf   51 -    53         -1.655215560789          3.897836035029         -0.929465459483
      0.3880000000D+00  0.1000000000D+01
 Atom H3       Shell    22 D   1     bf   54 -    58         -1.655215560789          3.897836035029         -0.929465459483
      0.1057000000D+01  0.1000000000D+01
 Atom H4       Shell    23 S   3     bf   59 -    59         -1.655215560789         -3.897836035029         -0.929465459483
      0.3387000000D+02  0.2549486323D-01
      0.5095000000D+01  0.1903627659D+00
      0.1159000000D+01  0.8521620222D+00
 Atom H4       Shell    24 S   1     bf   60 -    60         -1.655215560789         -3.897836035029         -0.929465459483
      0.3258000000D+00  0.1000000000D+01
 Atom H4       Shell    25 S   1     bf   61 -    61         -1.655215560789         -3.897836035029         -0.929465459483
      0.1027000000D+00  0.1000000000D+01
 Atom H4       Shell    26 P   1     bf   62 -    64         -1.655215560789         -3.897836035029         -0.929465459483
      0.1407000000D+01  0.1000000000D+01
 Atom H4       Shell    27 P   1     bf   65 -    67         -1.655215560789         -3.897836035029         -0.929465459483
      0.3880000000D+00  0.1000000000D+01
 Atom H4       Shell    28 D   1     bf   68 -    72         -1.655215560789         -3.897836035029         -0.929465459483
      0.1057000000D+01  0.1000000000D+01
 Atom H5       Shell    29 S   3     bf   73 -    73          1.655215560789         -3.897836035029         -0.929465459483
      0.3387000000D+02  0.2549486323D-01
      0.5095000000D+01  0.1903627659D+00
      0.1159000000D+01  0.8521620222D+00
 Atom H5       Shell    30 S   1     bf   74 -    74          1.655215560789         -3.897836035029         -0.929465459483
      0.3258000000D+00  0.1000000000D+01
 Atom H5       Shell    31 S   1     bf   75 -    75          1.655215560789         -3.897836035029         -0.929465459483
      0.1027000000D+00  0.1000000000D+01
 Atom H5       Shell    32 P   1     bf   76 -    78          1.655215560789         -3.897836035029         -0.929465459483
      0.1407000000D+01  0.1000000000D+01
 Atom H5       Shell    33 P   1     bf   79 -    81          1.655215560789         -3.897836035029         -0.929465459483
      0.3880000000D+00  0.1000000000D+01
 Atom H5       Shell    34 D   1     bf   82 -    86          1.655215560789         -3.897836035029         -0.929465459483
      0.1057000000D+01  0.1000000000D+01
 Atom C6       Shell    35 S   7     bf   87 -    87          0.000000000000         -2.681819945116         -1.108857485707
      0.8236000000D+04  0.5419783203D-03
      0.1235000000D+04  0.4192873817D-02
      0.2808000000D+03  0.2152216205D-01
      0.7927000000D+02  0.8353432195D-01
      0.2559000000D+02  0.2395828457D+00
      0.8997000000D+01  0.4428528419D+00
      0.3319000000D+01  0.3517995618D+00
 Atom C6       Shell    36 S   6     bf   88 -    88          0.000000000000         -2.681819945116         -1.108857485707
      0.2808000000D+03 -0.5949224937D-04
      0.7927000000D+02 -0.1148158310D-02
      0.2559000000D+02 -0.1001913745D-01
      0.8997000000D+01 -0.6121949230D-01
      0.3319000000D+01 -0.1732698541D+00
      0.3643000000D+00  0.1072915192D+01
 Atom C6       Shell    37 S   1     bf   89 -    89          0.000000000000         -2.681819945116         -1.108857485707
      0.9059000000D+00  0.1000000000D+01
 Atom C6       Shell    38 S   1     bf   90 -    90          0.000000000000         -2.681819945116         -1.108857485707
      0.1285000000D+00  0.1000000000D+01
 Atom C6       Shell    39 P   3     bf   91 -    93          0.000000000000         -2.681819945116         -1.108857485707
      0.1871000000D+02  0.3942638716D-01
      0.4133000000D+01  0.2440889849D+00
      0.1200000000D+01  0.8154920089D+00
 Atom C6       Shell    40 P   1     bf   94 -    96          0.000000000000         -2.681819945116         -1.108857485707
      0.3827000000D+00  0.1000000000D+01
 Atom C6       Shell    41 P   1     bf   97 -    99          0.000000000000         -2.681819945116         -1.108857485707
      0.1209000000D+00  0.1000000000D+01
 Atom C6       Shell    42 D   1     bf  100 -   104          0.000000000000         -2.681819945116         -1.108857485707
      0.1097000000D+01  0.1000000000D+01
 Atom C6       Shell    43 D   1     bf  105 -   109          0.000000000000         -2.681819945116         -1.108857485707
      0.3180000000D+00  0.1000000000D+01
 Atom C6       Shell    44 F   1     bf  110 -   116          0.000000000000         -2.681819945116         -1.108857485707
      0.7610000000D+00  0.1000000000D+01
 Atom C7       Shell    45 S   7     bf  117 -   117          0.000000000000         -1.266169415912         -3.601844226972
      0.8236000000D+04  0.5419783203D-03
      0.1235000000D+04  0.4192873817D-02
      0.2808000000D+03  0.2152216205D-01
      0.7927000000D+02  0.8353432195D-01
      0.2559000000D+02  0.2395828457D+00
      0.8997000000D+01  0.4428528419D+00
      0.3319000000D+01  0.3517995618D+00
 Atom C7       Shell    46 S   6     bf  118 -   118          0.000000000000         -1.266169415912         -3.601844226972
      0.2808000000D+03 -0.5949224937D-04
      0.7927000000D+02 -0.1148158310D-02
      0.2559000000D+02 -0.1001913745D-01
      0.8997000000D+01 -0.6121949230D-01
      0.3319000000D+01 -0.1732698541D+00
      0.3643000000D+00  0.1072915192D+01
 Atom C7       Shell    47 S   1     bf  119 -   119          0.000000000000         -1.266169415912         -3.601844226972
      0.9059000000D+00  0.1000000000D+01
 Atom C7       Shell    48 S   1     bf  120 -   120          0.000000000000         -1.266169415912         -3.601844226972
      0.1285000000D+00  0.1000000000D+01
 Atom C7       Shell    49 P   3     bf  121 -   123          0.000000000000         -1.266169415912         -3.601844226972
      0.1871000000D+02  0.3942638716D-01
      0.4133000000D+01  0.2440889849D+00
      0.1200000000D+01  0.8154920089D+00
 Atom C7       Shell    50 P   1     bf  124 -   126          0.000000000000         -1.266169415912         -3.601844226972
      0.3827000000D+00  0.1000000000D+01
 Atom C7       Shell    51 P   1     bf  127 -   129          0.000000000000         -1.266169415912         -3.601844226972
      0.1209000000D+00  0.1000000000D+01
 Atom C7       Shell    52 D   1     bf  130 -   134          0.000000000000         -1.266169415912         -3.601844226972
      0.1097000000D+01  0.1000000000D+01
 Atom C7       Shell    53 D   1     bf  135 -   139          0.000000000000         -1.266169415912         -3.601844226972
      0.3180000000D+00  0.1000000000D+01
 Atom C7       Shell    54 F   1     bf  140 -   146          0.000000000000         -1.266169415912         -3.601844226972
      0.7610000000D+00  0.1000000000D+01
 Atom H8       Shell    55 S   3     bf  147 -   147         -0.000000000000         -2.312605253736         -5.359918529977
      0.3387000000D+02  0.2549486323D-01
      0.5095000000D+01  0.1903627659D+00
      0.1159000000D+01  0.8521620222D+00
 Atom H8       Shell    56 S   1     bf  148 -   148         -0.000000000000         -2.312605253736         -5.359918529977
      0.3258000000D+00  0.1000000000D+01
 Atom H8       Shell    57 S   1     bf  149 -   149         -0.000000000000         -2.312605253736         -5.359918529977
      0.1027000000D+00  0.1000000000D+01
 Atom H8       Shell    58 P   1     bf  150 -   152         -0.000000000000         -2.312605253736         -5.359918529977
      0.1407000000D+01  0.1000000000D+01
 Atom H8       Shell    59 P   1     bf  153 -   155         -0.000000000000         -2.312605253736         -5.359918529977
      0.3880000000D+00  0.1000000000D+01
 Atom H8       Shell    60 D   1     bf  156 -   160         -0.000000000000         -2.312605253736         -5.359918529977
      0.1057000000D+01  0.1000000000D+01
 Atom C9       Shell    61 S   7     bf  161 -   161          0.000000000000          1.266169415912         -3.601844226972
      0.8236000000D+04  0.5419783203D-03
      0.1235000000D+04  0.4192873817D-02
      0.2808000000D+03  0.2152216205D-01
      0.7927000000D+02  0.8353432195D-01
      0.2559000000D+02  0.2395828457D+00
      0.8997000000D+01  0.4428528419D+00
      0.3319000000D+01  0.3517995618D+00
 Atom C9       Shell    62 S   6     bf  162 -   162          0.000000000000          1.266169415912         -3.601844226972
      0.2808000000D+03 -0.5949224937D-04
      0.7927000000D+02 -0.1148158310D-02
      0.2559000000D+02 -0.1001913745D-01
      0.8997000000D+01 -0.6121949230D-01
      0.3319000000D+01 -0.1732698541D+00
      0.3643000000D+00  0.1072915192D+01
 Atom C9       Shell    63 S   1     bf  163 -   163          0.000000000000          1.266169415912         -3.601844226972
      0.9059000000D+00  0.1000000000D+01
 Atom C9       Shell    64 S   1     bf  164 -   164          0.000000000000          1.266169415912         -3.601844226972
      0.1285000000D+00  0.1000000000D+01
 Atom C9       Shell    65 P   3     bf  165 -   167          0.000000000000          1.266169415912         -3.601844226972
      0.1871000000D+02  0.3942638716D-01
      0.4133000000D+01  0.2440889849D+00
      0.1200000000D+01  0.8154920089D+00
 Atom C9       Shell    66 P   1     bf  168 -   170          0.000000000000          1.266169415912         -3.601844226972
      0.3827000000D+00  0.1000000000D+01
 Atom C9       Shell    67 P   1     bf  171 -   173          0.000000000000          1.266169415912         -3.601844226972
      0.1209000000D+00  0.1000000000D+01
 Atom C9       Shell    68 D   1     bf  174 -   178          0.000000000000          1.266169415912         -3.601844226972
      0.1097000000D+01  0.1000000000D+01
 Atom C9       Shell    69 D   1     bf  179 -   183          0.000000000000          1.266169415912         -3.601844226972
      0.3180000000D+00  0.1000000000D+01
 Atom C9       Shell    70 F   1     bf  184 -   190          0.000000000000          1.266169415912         -3.601844226972
      0.7610000000D+00  0.1000000000D+01
 Atom H10      Shell    71 S   3     bf  191 -   191          0.000000000000          2.312605253736         -5.359918529977
      0.3387000000D+02  0.2549486323D-01
      0.5095000000D+01  0.1903627659D+00
      0.1159000000D+01  0.8521620222D+00
 Atom H10      Shell    72 S   1     bf  192 -   192          0.000000000000          2.312605253736         -5.359918529977
      0.3258000000D+00  0.1000000000D+01
 Atom H10      Shell    73 S   1     bf  193 -   193          0.000000000000          2.312605253736         -5.359918529977
      0.1027000000D+00  0.1000000000D+01
 Atom H10      Shell    74 P   1     bf  194 -   196          0.000000000000          2.312605253736         -5.359918529977
      0.1407000000D+01  0.1000000000D+01
 Atom H10      Shell    75 P   1     bf  197 -   199          0.000000000000          2.312605253736         -5.359918529977
      0.3880000000D+00  0.1000000000D+01
 Atom H10      Shell    76 D   1     bf  200 -   204          0.000000000000          2.312605253736         -5.359918529977
      0.1057000000D+01  0.1000000000D+01
 Atom Si11     Shell    77 S  11     bf  205 -   205          0.000000000000          0.000000000000          1.190207122944
      0.2549000000D+06  0.6238088535D-04
      0.3819000000D+05  0.4845466693D-03
      0.8690000000D+04  0.2539893209D-02
      0.2462000000D+04  0.1056456546D-01
      0.8048000000D+03  0.3680078696D-01
      0.2913000000D+03  0.1072426597D+00
      0.1136000000D+03  0.2473382989D+00
      0.4675000000D+02  0.3897534068D+00
      0.1982000000D+02  0.3006716394D+00
      0.7708000000D+01  0.5650090631D-01
      0.1402000000D+01  0.6226991515D-02
 Atom Si11     Shell    78 S   9     bf  206 -   206          0.000000000000          0.000000000000          1.190207122944
      0.2462000000D+04 -0.1752058729D-04
      0.8048000000D+03 -0.2181197954D-03
      0.2913000000D+03 -0.1903662287D-02
      0.1136000000D+03 -0.1154945923D-01
      0.4675000000D+02 -0.4976382836D-01
      0.1982000000D+02 -0.9938072155D-01
      0.7708000000D+01  0.9431175782D-01
      0.3340000000D+01  0.5435385708D+00
      0.1402000000D+01  0.4759770115D+00
 Atom Si11     Shell    79 S   9     bf  207 -   207          0.000000000000          0.000000000000          1.190207122944
      0.2462000000D+04 -0.1686141182D-05
      0.8048000000D+03  0.4746598974D-05
      0.1136000000D+03  0.2340735485D-03
      0.4675000000D+02  0.9113181297D-03
      0.1982000000D+02  0.4034121524D-02
      0.7708000000D+01 -0.5457607873D-02
      0.3340000000D+01 -0.7221273589D-01
      0.1402000000D+01 -0.3182587179D+00
      0.2070000000D+00  0.1142213504D+01
 Atom Si11     Shell    80 S   1     bf  208 -   208          0.000000000000          0.000000000000          1.190207122944
      0.4387000000D+00  0.1000000000D+01
 Atom Si11     Shell    81 S   1     bf  209 -   209          0.000000000000          0.000000000000          1.190207122944
      0.7944000000D-01  0.1000000000D+01
 Atom Si11     Shell    82 P   6     bf  210 -   212          0.000000000000          0.000000000000          1.190207122944
      0.4815000000D+03  0.2085549471D-02
      0.1139000000D+03  0.1667619837D-01
      0.3623000000D+02  0.7753893526D-01
      0.1334000000D+02  0.2313987378D+00
      0.5252000000D+01  0.4239367733D+00
      0.2120000000D+01  0.4277947460D+00
 Atom Si11     Shell    83 P   6     bf  213 -   215          0.000000000000          0.000000000000          1.190207122944
      0.1139000000D+03 -0.2184944274D-03
      0.3623000000D+02 -0.4051387665D-03
      0.1334000000D+02 -0.7285939736D-02
      0.5252000000D+01 -0.5757615037D-02
      0.2120000000D+01 -0.5337060557D-01
      0.2528000000D+00  0.1015139649D+01
 Atom Si11     Shell    84 P   1     bf  216 -   218          0.000000000000          0.000000000000          1.190207122944
      0.8561000000D+00  0.1000000000D+01
 Atom Si11     Shell    85 P   1     bf  219 -   221          0.000000000000          0.000000000000          1.190207122944
      0.7889000000D-01  0.1000000000D+01
 Atom Si11     Shell    86 D   1     bf  222 -   226          0.000000000000          0.000000000000          1.190207122944
      0.1590000000D+00  0.1000000000D+01
 Atom Si11     Shell    87 D   1     bf  227 -   231          0.000000000000          0.000000000000          1.190207122944
      0.4810000000D+00  0.1000000000D+01
 Atom Si11     Shell    88 F   1     bf  232 -   238          0.000000000000          0.000000000000          1.190207122944
      0.3360000000D+00  0.1000000000D+01
 Atom F12      Shell    89 S   7     bf  239 -   239          2.397001624078         -0.000000000000          3.016845539757
      0.1950000000D+05  0.5190024441D-03
      0.2923000000D+04  0.4015781354D-02
      0.6645000000D+03  0.2067746110D-01
      0.1875000000D+03  0.8086901703D-01
      0.6062000000D+02  0.2358075463D+00
      0.2142000000D+02  0.4425823060D+00
      0.7950000000D+01  0.3569628672D+00
 Atom F12      Shell    90 S   6     bf  240 -   240          2.397001624078         -0.000000000000          3.016845539757
      0.6645000000D+03 -0.3735980873D-04
      0.1875000000D+03 -0.1277472297D-02
      0.6062000000D+02 -0.1082201399D-01
      0.2142000000D+02 -0.7004820894D-01
      0.7950000000D+01 -0.1697466078D+00
      0.8815000000D+00  0.1073026608D+01
 Atom F12      Shell    91 S   1     bf  241 -   241          2.397001624078         -0.000000000000          3.016845539757
      0.2257000000D+01  0.1000000000D+01
 Atom F12      Shell    92 S   1     bf  242 -   242          2.397001624078         -0.000000000000          3.016845539757
      0.3041000000D+00  0.1000000000D+01
 Atom F12      Shell    93 P   3     bf  243 -   245          2.397001624078         -0.000000000000          3.016845539757
      0.4388000000D+02  0.4190462069D-01
      0.9926000000D+01  0.2626978417D+00
      0.2930000000D+01  0.7977593735D+00
 Atom F12      Shell    94 P   1     bf  246 -   248          2.397001624078         -0.000000000000          3.016845539757
      0.9132000000D+00  0.1000000000D+01
 Atom F12      Shell    95 P   1     bf  249 -   251          2.397001624078         -0.000000000000          3.016845539757
      0.2672000000D+00  0.1000000000D+01
 Atom F12      Shell    96 D   1     bf  252 -   256          2.397001624078         -0.000000000000          3.016845539757
      0.3107000000D+01  0.1000000000D+01
 Atom F12      Shell    97 D   1     bf  257 -   261          2.397001624078         -0.000000000000          3.016845539757
      0.8550000000D+00  0.1000000000D+01
 Atom F12      Shell    98 F   1     bf  262 -   268          2.397001624078         -0.000000000000          3.016845539757
      0.1917000000D+01  0.1000000000D+01
 Atom F13      Shell    99 S   7     bf  269 -   269         -2.397001624078          0.000000000000          3.016845539757
      0.1950000000D+05  0.5190024441D-03
      0.2923000000D+04  0.4015781354D-02
      0.6645000000D+03  0.2067746110D-01
      0.1875000000D+03  0.8086901703D-01
      0.6062000000D+02  0.2358075463D+00
      0.2142000000D+02  0.4425823060D+00
      0.7950000000D+01  0.3569628672D+00
 Atom F13      Shell   100 S   6     bf  270 -   270         -2.397001624078          0.000000000000          3.016845539757
      0.6645000000D+03 -0.3735980873D-04
      0.1875000000D+03 -0.1277472297D-02
      0.6062000000D+02 -0.1082201399D-01
      0.2142000000D+02 -0.7004820894D-01
      0.7950000000D+01 -0.1697466078D+00
      0.8815000000D+00  0.1073026608D+01
 Atom F13      Shell   101 S   1     bf  271 -   271         -2.397001624078          0.000000000000          3.016845539757
      0.2257000000D+01  0.1000000000D+01
 Atom F13      Shell   102 S   1     bf  272 -   272         -2.397001624078          0.000000000000          3.016845539757
      0.3041000000D+00  0.1000000000D+01
 Atom F13      Shell   103 P   3     bf  273 -   275         -2.397001624078          0.000000000000          3.016845539757
      0.4388000000D+02  0.4190462069D-01
      0.9926000000D+01  0.2626978417D+00
      0.2930000000D+01  0.7977593735D+00
 Atom F13      Shell   104 P   1     bf  276 -   278         -2.397001624078          0.000000000000          3.016845539757
      0.9132000000D+00  0.1000000000D+01
 Atom F13      Shell   105 P   1     bf  279 -   281         -2.397001624078          0.000000000000          3.016845539757
      0.2672000000D+00  0.1000000000D+01
 Atom F13      Shell   106 D   1     bf  282 -   286         -2.397001624078          0.000000000000          3.016845539757
      0.3107000000D+01  0.1000000000D+01
 Atom F13      Shell   107 D   1     bf  287 -   291         -2.397001624078          0.000000000000          3.016845539757
      0.8550000000D+00  0.1000000000D+01
 Atom F13      Shell   108 F   1     bf  292 -   298         -2.397001624078          0.000000000000          3.016845539757
      0.1917000000D+01  0.1000000000D+01
 There are   116 symmetry adapted cartesian basis functions of A1  symmetry.
 There are    55 symmetry adapted cartesian basis functions of A2  symmetry.
 There are    74 symmetry adapted cartesian basis functions of B1  symmetry.
 There are    94 symmetry adapted cartesian basis functions of B2  symmetry.
 There are    99 symmetry adapted basis functions of A1  symmetry.
 There are    51 symmetry adapted basis functions of A2  symmetry.
 There are    66 symmetry adapted basis functions of B1  symmetry.
 There are    82 symmetry adapted basis functions of B2  symmetry.
   298 basis functions,   509 primitive gaussians,   339 cartesian basis functions
    31 alpha electrons       31 beta electrons
       nuclear repulsion energy       385.7634451086 Hartrees.
 IExCor=    0 DFT=F Ex=HF Corr=None ExCW=0 ScaHFX=  1.000000
 ScaDFX=  1.000000  1.000000  1.000000  1.000000 ScalE2=  1.000000  1.000000
 IRadAn=      5 IRanWt=     -1 IRanGd=            0 ICorTp=0 IEmpDi=  4
 NAtoms=   13 NActive=   13 NUniq=    6 SFac= 4.00D+00 NAtFMM=   60 NAOKFM=F Big=F
 Integral buffers will be    131072 words long.
 Raffenetti 1 integral format.
 Two-electron integral symmetry is turned on.
 Leave Link  301 at Mon Jul  1 14:19:26 2019, MaxMem=  7340032000 cpu:               2.2 elap:               0.2
 (Enter /share/apps/Gaussian/g16_b01/g16/l302.exe)
 NPDir=0 NMtPBC=     1 NCelOv=     1 NCel=       1 NClECP=     1 NCelD=      1
         NCelK=      1 NCelE2=     1 NClLst=     1 CellRange=     0.0.
 One-electron integrals computed using PRISM.
 One-electron integral symmetry used in STVInt
 NBasis=   298 RedAO= T EigKep=  2.85D-04  NBF=    99    51    66    82
 NBsUse=   298 1.00D-06 EigRej= -1.00D+00 NBFU=    99    51    66    82
 Leave Link  302 at Mon Jul  1 14:19:27 2019, MaxMem=  7340032000 cpu:               7.1 elap:               0.5
 (Enter /share/apps/Gaussian/g16_b01/g16/l303.exe)
 DipDrv:  MaxL=1.
 Leave Link  303 at Mon Jul  1 14:19:27 2019, MaxMem=  7340032000 cpu:               1.5 elap:               0.2
 (Enter /share/apps/Gaussian/g16_b01/g16/l401.exe)
 ExpMin= 7.89D-02 ExpMax= 2.55D+05 ExpMxC= 2.46D+03 IAcc=3 IRadAn=         5 AccDes= 0.00D+00
 Harris functional with IExCor=  205 and IRadAn=       5 diagonalized for initial guess.
 HarFok:  IExCor=  205 AccDes= 0.00D+00 IRadAn=         5 IDoV= 1 UseB2=F ITyADJ=14
 ICtDFT=  3500011 ScaDFX=  1.000000  1.000000  1.000000  1.000000
 FoFCou: FMM=F IPFlag=           0 FMFlag=      100000 FMFlg1=           0
         NFxFlg=           0 DoJE=T BraDBF=F KetDBF=T FulRan=T
         wScrn=  0.000000 ICntrl=       500 IOpCl=  0 I1Cent=   200000004 NGrid=           0
         NMat0=    1 NMatS0=      1 NMatT0=    0 NMatD0=    1 NMtDS0=    0 NMtDT0=    0
 Petite list used in FoFCou.
 Harris En= -643.035192041128    
 JPrj=0 DoOrth=F DoCkMO=F.
 Initial guess orbital symmetries:
       Occupied  (A1) (B1) (A1) (A1) (B2) (A1) (B2) (A1) (A1) (B1)
                 (B2) (A1) (B1) (A1) (B2) (A1) (B2) (A1) (A1) (B1)
                 (A1) (B1) (A2) (A1) (B2) (B2) (A2) (B1) (A1) (B2)
                 (B1)
       Virtual   (A2) (B1) (A1) (A1) (A1) (B2) (B2) (B1) (A1) (A2)
                 (B2) (A1) (A1) (B2) (B2) (A1) (A2) (A1) (B1) (B2)
                 (B2) (B1) (A1) (A1) (A1) (A2) (B1) (B2) (B1) (A1)
                 (B2) (A2) (A1) (A1) (B2) (A2) (B2) (B1) (B2) (B2)
                 (A1) (B1) (A1) (B1) (A1) (A2) (B2) (B2) (A2) (A1)
                 (B1) (A1) (B2) (B1) (B1) (A1) (A2) (B2) (A1) (B1)
                 (A2) (B2) (A1) (B1) (B2) (B1) (A1) (A2) (A1) (B2)
                 (A2) (A1) (A1) (B2) (B1) (B2) (A1) (A2) (A2) (B1)
                 (A1) (B2) (B1) (A1) (B2) (A1) (B1) (A2) (B2) (B2)
                 (A1) (A1) (A2) (B2) (A2) (B2) (A1) (B1) (A1) (B2)
                 (B1) (A1) (B2) (B1) (A2) (B1) (A1) (A1) (B2) (B2)
                 (A2) (A2) (A1) (A1) (B1) (B2) (A1) (B2) (B1) (B1)
                 (A1) (B2) (A1) (A2) (B1) (B2) (A2) (B1) (A1) (A1)
                 (B1) (B2) (A1) (A1) (B2) (A1) (B1) (B2) (B1) (A2)
                 (A1) (A2) (B1) (B2) (A2) (B1) (A1) (B2) (A1) (A2)
                 (A2) (B1) (B1) (B2) (A2) (A1) (A1) (B2) (B1) (A1)
                 (B2) (B2) (B1) (B2) (A2) (A1) (A2) (A1) (B2) (A2)
                 (B1) (A1) (B2) (A2) (B1) (A1) (B2) (A1) (B2) (A2)
                 (B1) (A1) (B1) (B2) (A2) (B1) (B2) (A1) (B2) (A1)
                 (B2) (A1) (B1) (A2) (A2) (A1) (B2) (B2) (A1) (B1)
                 (B2) (A1) (A2) (A1) (A2) (B2) (B1) (A2) (A1) (B2)
                 (B2) (B1) (A1) (A2) (A1) (B1) (A1) (B2) (A2) (B1)
                 (B2) (A1) (A2) (B1) (A1) (B1) (A1) (B2) (A2) (B2)
                 (A1) (B2) (A1) (B2) (B1) (A2) (B2) (B1) (A2) (B2)
                 (A2) (B1) (A1) (A1) (A1) (B2) (B1) (A2) (B2) (B1)
                 (A1) (B1) (A2) (A1) (B2) (B2) (B1) (A2) (A1) (A1)
                 (B1) (A1) (A1) (B1) (A1) (B2) (B2)
 The electronic state of the initial guess is 1-A1.
 Leave Link  401 at Mon Jul  1 14:19:28 2019, MaxMem=  7340032000 cpu:              14.7 elap:               1.0
 (Enter /share/apps/Gaussian/g16_b01/g16/l502.exe)
 Keep R1 ints in memory in symmetry-blocked form, NReq=1241299071.
 FoFCou: FMM=F IPFlag=           0 FMFlag=           0 FMFlg1=           0
         NFxFlg=           0 DoJE=F BraDBF=F KetDBF=F FulRan=T
         wScrn=  0.000000 ICntrl=       600 IOpCl=  0 I1Cent=           0 NGrid=           0
         NMat0=    1 NMatS0=  44551 NMatT0=    0 NMatD0=    1 NMtDS0=    0 NMtDT0=    0
 Petite list used in FoFCou.
 Closed shell SCF:
 Using DIIS extrapolation, IDIIS=  1040.
 NGot=  7340032000 LenX=  7090914576 LenY=  7090799214
 Requested convergence on RMS density matrix=1.00D-08 within 128 cycles.
 Requested convergence on MAX density matrix=1.00D-06.
 Requested convergence on             energy=1.00D-06.
 No special actions if energy rises.

 Cycle   1  Pass 1  IDiag  1:
 E= -642.723604773696    
 DIIS: error= 4.60D-02 at cycle   1 NSaved=   1.
 NSaved= 1 IEnMin= 1 EnMin= -642.723604773696     IErMin= 1 ErrMin= 4.60D-02
 ErrMax= 4.60D-02  0.00D+00 EMaxC= 1.00D-01 BMatC= 7.31D-01 BMatP= 7.31D-01
 IDIUse=3 WtCom= 5.40D-01 WtEn= 4.60D-01
 Coeff-Com:  0.100D+01
 Coeff-En:   0.100D+01
 Coeff:      0.100D+01
 Gap=     0.448 Goal=   None    Shift=    0.000
 GapD=    0.448 DampG=2.000 DampE=0.500 DampFc=1.0000 IDamp=-1.
 RMSDP=1.69D-03 MaxDP=9.85D-02              OVMax= 1.41D-01

 Cycle   2  Pass 1  IDiag  1:
 E= -643.005175291988     Delta-E=       -0.281570518292 Rises=F Damp=F
 DIIS: error= 2.09D-02 at cycle   2 NSaved=   2.
 NSaved= 2 IEnMin= 2 EnMin= -643.005175291988     IErMin= 2 ErrMin= 2.09D-02
 ErrMax= 2.09D-02  0.00D+00 EMaxC= 1.00D-01 BMatC= 6.72D-02 BMatP= 7.31D-01
 IDIUse=3 WtCom= 7.91D-01 WtEn= 2.09D-01
 Coeff-Com:  0.159D+00 0.841D+00
 Coeff-En:   0.000D+00 0.100D+01
 Coeff:      0.126D+00 0.874D+00
 Gap=     0.533 Goal=   None    Shift=    0.000
 RMSDP=6.60D-04 MaxDP=2.11D-02 DE=-2.82D-01 OVMax= 5.48D-02

 Cycle   3  Pass 1  IDiag  1:
 E= -643.055210584200     Delta-E=       -0.050035292212 Rises=F Damp=F
 DIIS: error= 6.23D-03 at cycle   3 NSaved=   3.
 NSaved= 3 IEnMin= 3 EnMin= -643.055210584200     IErMin= 3 ErrMin= 6.23D-03
 ErrMax= 6.23D-03  0.00D+00 EMaxC= 1.00D-01 BMatC= 6.88D-03 BMatP= 6.72D-02
 IDIUse=3 WtCom= 9.38D-01 WtEn= 6.23D-02
 Coeff-Com: -0.218D-01 0.209D+00 0.813D+00
 Coeff-En:   0.000D+00 0.000D+00 0.100D+01
 Coeff:     -0.204D-01 0.196D+00 0.825D+00
 Gap=     0.498 Goal=   None    Shift=    0.000
 RMSDP=1.47D-04 MaxDP=4.67D-03 DE=-5.00D-02 OVMax= 1.50D-02

 Cycle   4  Pass 1  IDiag  1:
 E= -643.060732066117     Delta-E=       -0.005521481917 Rises=F Damp=F
 DIIS: error= 6.56D-04 at cycle   4 NSaved=   4.
 NSaved= 4 IEnMin= 4 EnMin= -643.060732066117     IErMin= 4 ErrMin= 6.56D-04
 ErrMax= 6.56D-04  0.00D+00 EMaxC= 1.00D-01 BMatC= 7.91D-05 BMatP= 6.88D-03
 IDIUse=3 WtCom= 9.93D-01 WtEn= 6.56D-03
 Coeff-Com: -0.407D-02 0.155D-02 0.748D-01 0.928D+00
 Coeff-En:   0.000D+00 0.000D+00 0.000D+00 0.100D+01
 Coeff:     -0.404D-02 0.154D-02 0.743D-01 0.928D+00
 Gap=     0.499 Goal=   None    Shift=    0.000
 RMSDP=3.94D-05 MaxDP=1.28D-03 DE=-5.52D-03 OVMax= 2.45D-03

 Cycle   5  Pass 1  IDiag  1:
 E= -643.060831307268     Delta-E=       -0.000099241151 Rises=F Damp=F
 DIIS: error= 2.56D-04 at cycle   5 NSaved=   5.
 NSaved= 5 IEnMin= 5 EnMin= -643.060831307268     IErMin= 5 ErrMin= 2.56D-04
 ErrMax= 2.56D-04  0.00D+00 EMaxC= 1.00D-01 BMatC= 9.96D-06 BMatP= 7.91D-05
 IDIUse=3 WtCom= 9.97D-01 WtEn= 2.56D-03
 Coeff-Com:  0.133D-02-0.169D-01-0.607D-01 0.974D-01 0.979D+00
 Coeff-En:   0.000D+00 0.000D+00 0.000D+00 0.000D+00 0.100D+01
 Coeff:      0.133D-02-0.168D-01-0.605D-01 0.972D-01 0.979D+00
 Gap=     0.499 Goal=   None    Shift=    0.000
 RMSDP=1.64D-05 MaxDP=5.75D-04 DE=-9.92D-05 OVMax= 1.09D-03

 Cycle   6  Pass 1  IDiag  1:
 E= -643.060846376304     Delta-E=       -0.000015069035 Rises=F Damp=F
 DIIS: error= 1.08D-04 at cycle   6 NSaved=   6.
 NSaved= 6 IEnMin= 6 EnMin= -643.060846376304     IErMin= 6 ErrMin= 1.08D-04
 ErrMax= 1.08D-04  0.00D+00 EMaxC= 1.00D-01 BMatC= 9.24D-07 BMatP= 9.96D-06
 IDIUse=3 WtCom= 9.99D-01 WtEn= 1.08D-03
 Coeff-Com:  0.730D-03-0.443D-02-0.208D-01-0.637D-01 0.199D+00 0.889D+00
 Coeff-En:   0.000D+00 0.000D+00 0.000D+00 0.000D+00 0.000D+00 0.100D+01
 Coeff:      0.729D-03-0.442D-02-0.207D-01-0.636D-01 0.199D+00 0.889D+00
 Gap=     0.499 Goal=   None    Shift=    0.000
 RMSDP=5.01D-06 MaxDP=1.77D-04 DE=-1.51D-05 OVMax= 3.63D-04

 Cycle   7  Pass 1  IDiag  1:
 E= -643.060847716566     Delta-E=       -0.000001340262 Rises=F Damp=F
 DIIS: error= 1.98D-05 at cycle   7 NSaved=   7.
 NSaved= 7 IEnMin= 7 EnMin= -643.060847716566     IErMin= 7 ErrMin= 1.98D-05
 ErrMax= 1.98D-05  0.00D+00 EMaxC= 1.00D-01 BMatC= 3.96D-08 BMatP= 9.24D-07
 IDIUse=1 WtCom= 1.00D+00 WtEn= 0.00D+00
 Coeff-Com: -0.388D-04 0.646D-03 0.271D-02-0.774D-02-0.524D-01 0.314D-01
 Coeff-Com:  0.103D+01
 Coeff:     -0.388D-04 0.646D-03 0.271D-02-0.774D-02-0.524D-01 0.314D-01
 Coeff:      0.103D+01
 Gap=     0.499 Goal=   None    Shift=    0.000
 RMSDP=1.35D-06 MaxDP=4.07D-05 DE=-1.34D-06 OVMax= 1.17D-04

 Cycle   8  Pass 1  IDiag  1:
 E= -643.060847799751     Delta-E=       -0.000000083185 Rises=F Damp=F
 DIIS: error= 5.59D-06 at cycle   8 NSaved=   8.
 NSaved= 8 IEnMin= 8 EnMin= -643.060847799751     IErMin= 8 ErrMin= 5.59D-06
 ErrMax= 5.59D-06  0.00D+00 EMaxC= 1.00D-01 BMatC= 3.20D-09 BMatP= 3.96D-08
 IDIUse=1 WtCom= 1.00D+00 WtEn= 0.00D+00
 Coeff-Com: -0.529D-04 0.348D-03 0.175D-02 0.487D-02-0.175D-01-0.692D-01
 Coeff-Com:  0.816D-01 0.998D+00
 Coeff:     -0.529D-04 0.348D-03 0.175D-02 0.487D-02-0.175D-01-0.692D-01
 Coeff:      0.816D-01 0.998D+00
 Gap=     0.499 Goal=   None    Shift=    0.000
 RMSDP=3.43D-07 MaxDP=7.92D-06 DE=-8.32D-08 OVMax= 4.34D-05

 Cycle   9  Pass 1  IDiag  1:
 E= -643.060847806052     Delta-E=       -0.000000006301 Rises=F Damp=F
 DIIS: error= 1.63D-06 at cycle   9 NSaved=   9.
 NSaved= 9 IEnMin= 9 EnMin= -643.060847806052     IErMin= 9 ErrMin= 1.63D-06
 ErrMax= 1.63D-06  0.00D+00 EMaxC= 1.00D-01 BMatC= 1.98D-10 BMatP= 3.20D-09
 IDIUse=1 WtCom= 1.00D+00 WtEn= 0.00D+00
 Coeff-Com:  0.237D-05-0.449D-04-0.204D-03 0.459D-03 0.372D-02-0.153D-02
 Coeff-Com: -0.684D-01-0.248D-01 0.109D+01
 Coeff:      0.237D-05-0.449D-04-0.204D-03 0.459D-03 0.372D-02-0.153D-02
 Coeff:     -0.684D-01-0.248D-01 0.109D+01
 Gap=     0.499 Goal=   None    Shift=    0.000
 RMSDP=9.17D-08 MaxDP=1.90D-06 DE=-6.30D-09 OVMax= 1.12D-05

 Cycle  10  Pass 1  IDiag  1:
 E= -643.060847806504     Delta-E=       -0.000000000452 Rises=F Damp=F
 DIIS: error= 4.13D-07 at cycle  10 NSaved=  10.
 NSaved=10 IEnMin=10 EnMin= -643.060847806504     IErMin=10 ErrMin= 4.13D-07
 ErrMax= 4.13D-07  0.00D+00 EMaxC= 1.00D-01 BMatC= 1.59D-11 BMatP= 1.98D-10
 IDIUse=1 WtCom= 1.00D+00 WtEn= 0.00D+00
 Coeff-Com:  0.371D-05-0.290D-04-0.145D-03-0.287D-03 0.164D-02 0.475D-02
 Coeff-Com: -0.157D-01-0.701D-01 0.131D+00 0.948D+00
 Coeff:      0.371D-05-0.290D-04-0.145D-03-0.287D-03 0.164D-02 0.475D-02
 Coeff:     -0.157D-01-0.701D-01 0.131D+00 0.948D+00
 Gap=     0.499 Goal=   None    Shift=    0.000
 RMSDP=2.15D-08 MaxDP=4.32D-07 DE=-4.52D-10 OVMax= 3.17D-06

 Cycle  11  Pass 1  IDiag  1:
 E= -643.060847806556     Delta-E=       -0.000000000052 Rises=F Damp=F
 DIIS: error= 6.74D-08 at cycle  11 NSaved=  11.
 NSaved=11 IEnMin=11 EnMin= -643.060847806556     IErMin=11 ErrMin= 6.74D-08
 ErrMax= 6.74D-08  0.00D+00 EMaxC= 1.00D-01 BMatC= 8.37D-13 BMatP= 1.59D-11
 IDIUse=1 WtCom= 1.00D+00 WtEn= 0.00D+00
 Coeff-Com: -0.433D-06 0.571D-05 0.268D-04-0.120D-04-0.369D-03-0.312D-03
 Coeff-Com:  0.580D-02 0.115D-01-0.957D-01-0.989D-01 0.118D+01
 Coeff:     -0.433D-06 0.571D-05 0.268D-04-0.120D-04-0.369D-03-0.312D-03
 Coeff:      0.580D-02 0.115D-01-0.957D-01-0.989D-01 0.118D+01
 Gap=     0.499 Goal=   None    Shift=    0.000
 RMSDP=6.76D-09 MaxDP=1.76D-07 DE=-5.21D-11 OVMax= 5.86D-07

 SCF Done:  E(RHF) =  -643.060847807     A.U. after   11 cycles
            NFock= 11  Conv=0.68D-08     -V/T= 2.0006
 KE= 6.426964330263D+02 PE=-2.299017690632D+03 EE= 6.274969646902D+02
 Leave Link  502 at Mon Jul  1 14:19:48 2019, MaxMem=  7340032000 cpu:             230.7 elap:              18.8
 (Enter /share/apps/Gaussian/g16_b01/g16/l801.exe)
 Windowed orbitals will be sorted by symmetry type.
 ExpMin= 7.89D-02 ExpMax= 2.55D+05 ExpMxC= 2.46D+03 IAcc=3 IRadAn=         5 AccDes= 0.00D+00
 HarFok:  IExCor=  205 AccDes= 0.00D+00 IRadAn=         5 IDoV=-2 UseB2=F ITyADJ=14
 ICtDFT= 12500011 ScaDFX=  1.000000  1.000000  1.000000  1.000000
 Largest valence mixing into a core orbital is  3.24D-04
 Largest core mixing into a valence orbital is  4.55D-05
 Range of M.O.s used for correlation:    12   298
 NBasis=   298 NAE=    31 NBE=    31 NFC=    11 NFV=     0
 NROrb=    287 NOA=    20 NOB=    20 NVA=   267 NVB=   267

 **** Warning!!: The largest alpha MO coefficient is  0.12774629D+02

 Leave Link  801 at Mon Jul  1 14:19:49 2019, MaxMem=  7340032000 cpu:               2.8 elap:               0.3
 (Enter /share/apps/Gaussian/g16_b01/g16/l804.exe)
 Closed-shell transformation, MDV=  7340032000 ITran=4 ISComp=2.
 Unit  1 TFree=       2966606 TCopy=       1508005.
 Semi-Direct transformation.
 ModeAB=           4 MOrb=            20 LenV=    7337818695
 LASXX=     56604242 LTotXX=    56604242 LenRXX=   113831014
 LTotAB=    57226772 MaxLAS=   123564980 LenRXY=           0
 NonZer=   170435256 LenScr=   256245760 LnRSAI=   123564980
 LnScr1=   185597952 LExtra=           0 Total=    679239706
 MaxDsk=          -1 SrtSym=           T ITran=            4
 DoSDTr:  NPSUse= 16
 JobTyp=0 Pass  1:  I=   1 to  20.
 (rs|ai) integrals will be sorted in core.
 Complete sort for first half transformation.
 First half transformation complete.
 Begin second half transformation for I=  10.
 Begin second half transformation for I=  20.
 Complete sort for second half transformation.
 Second half transformation complete.
 Spin components of T(2) and E(2):
     alpha-alpha T2 =       0.4455976081D-01 E2=     -0.1572152984D+00
     alpha-beta  T2 =       0.2542742778D+00 E2=     -0.9524539484D+00
     beta-beta   T2 =       0.4455976081D-01 E2=     -0.1572152984D+00
 ANorm=    0.1159048661D+01
 E2 =    -0.1266884545D+01 EUMP2 =    -0.64432773235174D+03
 Leave Link  804 at Mon Jul  1 14:21:05 2019, MaxMem=  7340032000 cpu:            1197.0 elap:              75.8
 (Enter /share/apps/Gaussian/g16_b01/g16/l913.exe)
 CIDS:  MDV=  7340032000.
 Frozen-core window:  NFC=  11 NFV=   0.
 IFCWin=0 IBDFC=1 NFBD=     0     0 NFCmp=     0     0 NFFFC=     0     0
 Using DD3R+UMP44R for 1st iteration.
 Using DD4RQ for 2nd and later iterations.
 Keep R2 and R3 ints in memory in symmetry-blocked form, NReq=1241318449.
 FoFCou: FMM=F IPFlag=           0 FMFlag=           0 FMFlg1=           0
         NFxFlg=           0 DoJE=F BraDBF=F KetDBF=F FulRan=T
         wScrn=  0.000000 ICntrl=       600 IOpCl=  0 I1Cent=           0 NGrid=           0
         NMat0=    1 NMatS0=  44551 NMatT0=    0 NMatD0=    1 NMtDS0=    0 NMtDT0=    0
 Petite list used in FoFCou.
 CIDS: In Core Option IDoMem=           1.
 Coupled Cluster theory with single and double substitutions
 ===========================================================
 Iterations=  50 Convergence= 0.100D-07
 Produce multiple copies of IABC intergrals
 Iteration Nr.   1
 **********************
 DD1Dir will call FoFMem   1 times, MxPair=       420
 NAB=   210 NAA=     0 NBB=     0.
 MP4(R+Q)=  0.26174382D-01
 Maximum subspace dimension=  5
 A-vector RMS=  1.7025017D-03 Max=  1.2876953D-02 conv= 1.00D-06.
 RLE energy=       -1.2687139970
 E3=       -0.28447289D-01        EUMP3=      -0.64435617964D+03
 E4(DQ)=    0.23465890D-02        UMP4(DQ)=   -0.64435383305D+03
 E4(SDQ)=  -0.86915149D-02        UMP4(SDQ)=  -0.64436487116D+03
 VARIATIONAL ENERGIES WITH THE FIRST-ORDER WAVEFUNCTION:
 DE(Corr)=  -1.2687115     E(Corr)=     -644.32955932    
 NORM(A)=   0.11638009D+01
 Iteration Nr.   2
 **********************
 DD1Dir will call FoFMem   1 times, MxPair=       420
 NAB=   210 NAA=     0 NBB=     0.
 A-vector RMS=  2.3063231D-04 Max=  1.0428330D-02 conv= 1.00D-06.
 RLE energy=       -1.2995166247
 DE(Corr)=  -1.2975488     E(CORR)=     -644.35839661     Delta=-2.88D-02
 NORM(A)=   0.11751124D+01
 Iteration Nr.   3
 **********************
 DD1Dir will call FoFMem   1 times, MxPair=       420
 NAB=   210 NAA=     0 NBB=     0.
 A-vector RMS=  2.6043418D-04 Max=  3.4296555D-03 conv= 1.00D-06.
 RLE energy=       -1.3010213620
 DE(Corr)=  -1.2987905     E(CORR)=     -644.35963830     Delta=-1.24D-03
 NORM(A)=   0.11776760D+01
 Iteration Nr.   4
 **********************
 DD1Dir will call FoFMem   1 times, MxPair=       420
 NAB=   210 NAA=     0 NBB=     0.
 A-vector RMS=  4.7809033D-05 Max=  1.5929154D-03 conv= 1.00D-06.
 RLE energy=       -1.3012293104
 DE(Corr)=  -1.3010613     E(CORR)=     -644.36190912     Delta=-2.27D-03
 NORM(A)=   0.11784013D+01
 Iteration Nr.   5
 **********************
 DD1Dir will call FoFMem   1 times, MxPair=       420
 NAB=   210 NAA=     0 NBB=     0.
 A-vector RMS=  2.0090639D-05 Max=  5.8818259D-04 conv= 1.00D-06.
 RLE energy=       -1.3013492581
 DE(Corr)=  -1.3013027     E(CORR)=     -644.36215053     Delta=-2.41D-04
 NORM(A)=   0.11786045D+01
 Iteration Nr.   6
 **********************
 DD1Dir will call FoFMem   1 times, MxPair=       420
 NAB=   210 NAA=     0 NBB=     0.
 A-vector RMS=  5.9254360D-06 Max=  1.2352732D-04 conv= 1.00D-06.
 RLE energy=       -1.3013300948
 DE(Corr)=  -1.3013301     E(CORR)=     -644.36217787     Delta=-2.73D-05
 NORM(A)=   0.11786184D+01
 Iteration Nr.   7
 **********************
 DD1Dir will call FoFMem   1 times, MxPair=       420
 NAB=   210 NAA=     0 NBB=     0.
 A-vector RMS=  2.4264244D-06 Max=  4.3144497D-05 conv= 1.00D-06.
 RLE energy=       -1.3013231037
 DE(Corr)=  -1.3013321     E(CORR)=     -644.36217991     Delta=-2.04D-06
 NORM(A)=   0.11786190D+01
 Iteration Nr.   8
 **********************
 DD1Dir will call FoFMem   1 times, MxPair=       420
 NAB=   210 NAA=     0 NBB=     0.
 A-vector RMS=  8.6918140D-07 Max=  1.7545853D-05 conv= 1.00D-06.
 RLE energy=       -1.3013304068
 DE(Corr)=  -1.3013309     E(CORR)=     -644.36217870     Delta= 1.20D-06
 NORM(A)=   0.11786215D+01
 Iteration Nr.   9
 **********************
 DD1Dir will call FoFMem   1 times, MxPair=       420
 NAB=   210 NAA=     0 NBB=     0.
 A-vector RMS=  3.5867994D-07 Max=  6.5607522D-06 conv= 1.00D-06.
 RLE energy=       -1.3013307371
 DE(Corr)=  -1.3013309     E(CORR)=     -644.36217874     Delta=-3.38D-08
 NORM(A)=   0.11786218D+01
 Iteration Nr.  10
 **********************
 DD1Dir will call FoFMem   1 times, MxPair=       420
 NAB=   210 NAA=     0 NBB=     0.
 A-vector RMS=  1.2781646D-07 Max=  2.7903089D-06 conv= 1.00D-06.
 RLE energy=       -1.3013314323
 DE(Corr)=  -1.3013314     E(CORR)=     -644.36217920     Delta=-4.59D-07
 NORM(A)=   0.11786222D+01
 Iteration Nr.  11
 **********************
 DD1Dir will call FoFMem   1 times, MxPair=       420
 NAB=   210 NAA=     0 NBB=     0.
 A-vector RMS=  4.8552866D-08 Max=  1.1461487D-06 conv= 1.00D-06.
 RLE energy=       -1.3013316152
 DE(Corr)=  -1.3013315     E(CORR)=     -644.36217934     Delta=-1.46D-07
 NORM(A)=   0.11786224D+01
 Iteration Nr.  12
 **********************
 DD1Dir will call FoFMem   1 times, MxPair=       420
 NAB=   210 NAA=     0 NBB=     0.
 A-vector RMS=  1.7211647D-08 Max=  4.0503398D-07 conv= 1.00D-06.
 RLE energy=       -1.3013317008
 DE(Corr)=  -1.3013317     E(CORR)=     -644.36217948     Delta=-1.36D-07
 NORM(A)=   0.11786225D+01
 Iteration Nr.  13
 **********************
 DD1Dir will call FoFMem   1 times, MxPair=       420
 NAB=   210 NAA=     0 NBB=     0.
 A-vector RMS=  8.0491176D-09 Max=  1.3955500D-07 conv= 1.00D-06.
 RLE energy=       -1.3013317137
 DE(Corr)=  -1.3013317     E(CORR)=     -644.36217951     Delta=-2.79D-08
 NORM(A)=   0.11786225D+01
 Iteration Nr.  14
 **********************
 DD1Dir will call FoFMem   1 times, MxPair=       420
 NAB=   210 NAA=     0 NBB=     0.
 A-vector RMS=  2.8895889D-09 Max=  6.6154808D-08 conv= 1.00D-06.
 RLE energy=       -1.3013317258
 DE(Corr)=  -1.3013317     E(CORR)=     -644.36217953     Delta=-2.01D-08
 NORM(A)=   0.11786225D+01
 Iteration Nr.  15
 **********************
 DD1Dir will call FoFMem   1 times, MxPair=       420
 NAB=   210 NAA=     0 NBB=     0.
 A-vector RMS=  1.1672508D-09 Max=  2.8069058D-08 conv= 1.00D-06.
 RLE energy=       -1.3013317274
 DE(Corr)=  -1.3013317     E(CORR)=     -644.36217953     Delta=-5.36D-09
 NORM(A)=   0.11786226D+01
 CI/CC converged in   15 iterations to DelEn=-5.36D-09 Conv= 1.00D-08 ErrA1= 1.17D-09 Conv= 1.00D-06
 Wavefunction amplitudes converged. E(Corr)=     -644.36217953    
 Dominant configurations:
 ***********************
 Spin Case        I    J    A    B          Value
   ABAB          31   31   33   33      -0.102434D+00
 Largest amplitude= 1.02D-01

 Z-amplitude iterations

 Iteration Nr.   1
 **********************
 DD1Dir will call FoFMem   1 times, MxPair=       420
 NAB=   210 NAA=     0 NBB=     0.
 A-vector RMS=  6.0414197D-04 Max=  4.8353531D-03 conv= 1.00D-06.
 RLE energy=       -1.3001575017
 DE(Z)=  -1.2688029     E(Z)=     -644.32965070     Delta= 3.25D-02
 NORM(A)=   0.11782088D+01
 Iteration Nr.   2
 **********************
 DD1Dir will call FoFMem   1 times, MxPair=       420
 NAB=   210 NAA=     0 NBB=     0.
 A-vector RMS=  5.8121080D-04 Max=  4.6489642D-03 conv= 1.00D-06.
 RLE energy=       -1.3024308471
 DE(Z)=  -1.2686736     E(Z)=     -644.32952137     Delta= 1.29D-04
 NORM(A)=   0.11790159D+01
 Iteration Nr.   3
 **********************
 DD1Dir will call FoFMem   1 times, MxPair=       420
 NAB=   210 NAA=     0 NBB=     0.
 A-vector RMS=  6.2093337D-04 Max=  4.9679980D-03 conv= 1.00D-06.
 RLE energy=       -1.3035395216
 DE(Z)=  -1.2688985     E(Z)=     -644.32974633     Delta=-2.25D-04
 NORM(A)=   0.11794386D+01
 Iteration Nr.   4
 **********************
 DD1Dir will call FoFMem   1 times, MxPair=       420
 NAB=   210 NAA=     0 NBB=     0.
 A-vector RMS=  6.4146708D-04 Max=  5.1335832D-03 conv= 1.00D-06.
 RLE energy=       -1.2711301935
 DE(Z)=  -1.2690120     E(Z)=     -644.32985981     Delta=-1.13D-04
 NORM(A)=   0.11679569D+01
 Iteration Nr.   5
 **********************
 DD1Dir will call FoFMem   1 times, MxPair=       420
 NAB=   210 NAA=     0 NBB=     0.
 A-vector RMS=  9.6727391D-05 Max=  7.6646978D-04 conv= 1.00D-06.
 RLE energy=       -1.2654229674
 DE(Z)=  -1.2659609     E(Z)=     -644.32680867     Delta= 3.05D-03
 NORM(A)=   0.11660434D+01
 Iteration Nr.   6
 **********************
 DD1Dir will call FoFMem   1 times, MxPair=       420
 NAB=   210 NAA=     0 NBB=     0.
 A-vector RMS=  9.6035647D-07 Max=  1.3347733D-05 conv= 1.00D-06.
 RLE energy=       -1.2654218465
 DE(Z)=  -1.2654222     E(Z)=     -644.32626996     Delta= 5.39D-04
 NORM(A)=   0.11660413D+01
 Iteration Nr.   7
 **********************
 DD1Dir will call FoFMem   1 times, MxPair=       420
 NAB=   210 NAA=     0 NBB=     0.
 A-vector RMS=  6.4742237D-07 Max=  1.0596002D-05 conv= 1.00D-06.
 RLE energy=       -1.2654221052
 DE(Z)=  -1.2654221     E(Z)=     -644.32626989     Delta= 7.27D-08
 NORM(A)=   0.11660398D+01
 Iteration Nr.   8
 **********************
 DD1Dir will call FoFMem   1 times, MxPair=       420
 NAB=   210 NAA=     0 NBB=     0.
 A-vector RMS=  1.5526944D-07 Max=  3.0521599D-06 conv= 1.00D-06.
 RLE energy=       -1.2654222666
 DE(Z)=  -1.2654220     E(Z)=     -644.32626982     Delta= 6.35D-08
 NORM(A)=   0.11660400D+01
 Iteration Nr.   9
 **********************
 DD1Dir will call FoFMem   1 times, MxPair=       420
 NAB=   210 NAA=     0 NBB=     0.
 A-vector RMS=  6.8862452D-08 Max=  1.2133883D-06 conv= 1.00D-06.
 RLE energy=       -1.2654221536
 DE(Z)=  -1.2654221     E(Z)=     -644.32626993     Delta=-1.09D-07
 NORM(A)=   0.11660399D+01
 Iteration Nr.  10
 **********************
 DD1Dir will call FoFMem   1 times, MxPair=       420
 NAB=   210 NAA=     0 NBB=     0.
 A-vector RMS=  2.4387514D-08 Max=  5.5312896D-07 conv= 1.00D-06.
 RLE energy=       -1.2654221945
 DE(Z)=  -1.2654222     E(Z)=     -644.32626998     Delta=-4.37D-08
 NORM(A)=   0.11660400D+01
 Iteration Nr.  11
 **********************
 DD1Dir will call FoFMem   1 times, MxPair=       420
 NAB=   210 NAA=     0 NBB=     0.
 A-vector RMS=  6.0780725D-09 Max=  8.4115799D-08 conv= 1.00D-06.
 RLE energy=       -1.2654221586
 DE(Z)=  -1.2654222     E(Z)=     -644.32626996     Delta= 1.36D-08
 NORM(A)=   0.11660400D+01
 Iteration Nr.  12
 **********************
 DD1Dir will call FoFMem   1 times, MxPair=       420
 NAB=   210 NAA=     0 NBB=     0.
 A-vector RMS=  2.6846832D-09 Max=  3.4430072D-08 conv= 1.00D-06.
 RLE energy=       -1.2654221660
 DE(Z)=  -1.2654222     E(Z)=     -644.32626997     Delta=-9.80D-09
 NORM(A)=   0.11660400D+01
 CI/CC converged in   12 iterations to DelEn=-9.80D-09 Conv= 1.00D-08 ErrA1= 2.68D-09 Conv= 1.00D-06
 Z-amplitudes converged.
 Discarding MO integrals.
 Leave Link  913 at Mon Jul  1 14:58:24 2019, MaxMem=  7340032000 cpu:           34703.2 elap:            2232.8
 (Enter /share/apps/Gaussian/g16_b01/g16/l1111.exe)
 Unit  1 TFree=     122678084 TCopy=      26543085.
 Selected functions:
 Compute CCSD 2PDM.
 Form Post-SCF non-separable gradient here.
 IO1PDM=    0 IOW=    0 IO2PDM=    0.
 MDV=    7340032000.
 Frozen-core window:  NFC=  11 NFV=   0.
 Leave Link 1111 at Tue Jul  2 19:37:17 2019, MaxMem=  7340032000 cpu:         1569028.4 elap:          103128.3
 (Enter /share/apps/Gaussian/g16_b01/g16/l1002.exe)
 Minotr:  Closed shell wavefunction.
          Computing CCSD/QCISD derivatives.
          Using Z-Vector for PSCF gradient.
          Skipping F1 and S1 gradient terms here.
          IDoAtm=1111111111111
          Frozen-core window.
          Direct CPHF calculation.
          Differentiating once with respect to electric field.
                with respect to dipole field.
          Differentiating once with respect to nuclear coordinates.
          Using symmetry in CPHF.
          Requested convergence is 1.0D-10 RMS, and 1.0D-09 maximum.
          NewPWx=F KeepS1=T KeepF1=T KeepIn=T MapXYZ=F SortEE=F KeepMc=T.
 Keep R1 ints in memory in symmetry-blocked form, NReq=1241301289.
 FoFCou: FMM=F IPFlag=           0 FMFlag=           0 FMFlg1=           0
         NFxFlg=           0 DoJE=F BraDBF=F KetDBF=F FulRan=T
         wScrn=  0.000000 ICntrl=       600 IOpCl=  0 I1Cent=           0 NGrid=           0
         NMat0=    1 NMatS0=  44551 NMatT0=    0 NMatD0=    1 NMtDS0=    0 NMtDT0=    0
 Petite list used in FoFCou.
          MDV=    7340032000 using IRadAn=       5.
          Solving linear equations separately, MaxMat=       0.
          There are     1 degrees of freedom in the 1st order CPHF.  IDoFFX=0 NUNeed=     1.
 LinEq1:  Iter=  0 NonCon=     1 RMS=1.85D-03 Max=4.93D-02 NDo=     1
 AX will form     1 AO Fock derivatives at one time.
 LinEq1:  Iter=  1 NonCon=     1 RMS=5.37D-04 Max=1.19D-02 NDo=     1
 LinEq1:  Iter=  2 NonCon=     1 RMS=1.39D-04 Max=3.49D-03 NDo=     1
 LinEq1:  Iter=  3 NonCon=     1 RMS=3.66D-05 Max=7.07D-04 NDo=     1
 LinEq1:  Iter=  4 NonCon=     1 RMS=1.28D-05 Max=2.48D-04 NDo=     1
 LinEq1:  Iter=  5 NonCon=     1 RMS=3.17D-06 Max=6.81D-05 NDo=     1
 LinEq1:  Iter=  6 NonCon=     1 RMS=6.35D-07 Max=1.51D-05 NDo=     1
 LinEq1:  Iter=  7 NonCon=     1 RMS=1.72D-07 Max=4.14D-06 NDo=     1
 LinEq1:  Iter=  8 NonCon=     1 RMS=4.15D-08 Max=6.93D-07 NDo=     1
 LinEq1:  Iter=  9 NonCon=     1 RMS=9.43D-09 Max=2.28D-07 NDo=     1
 LinEq1:  Iter= 10 NonCon=     1 RMS=1.93D-09 Max=2.94D-08 NDo=     1
 LinEq1:  Iter= 11 NonCon=     1 RMS=4.08D-10 Max=7.24D-09 NDo=     1
 LinEq1:  Iter= 12 NonCon=     1 RMS=5.94D-11 Max=1.24D-09 NDo=     1
 LinEq1:  Iter= 13 NonCon=     0 RMS=9.56D-12 Max=1.76D-10 NDo=     1
 Linear equations converged to 1.000D-10 1.000D-09 after    13 iterations.
 End of Minotr F.D. properties file   721 does not exist.
 End of Minotr F.D. properties file   722 does not exist.
 End of Minotr F.D. properties file   788 does not exist.
 Leave Link 1002 at Tue Jul  2 19:38:00 2019, MaxMem=  7340032000 cpu:             277.5 elap:              42.4
 (Enter /share/apps/Gaussian/g16_b01/g16/l601.exe)
 Copying SCF densities to generalized density rwf, IOpCl= 0 IROHF=0.

 **********************************************************************

            Population analysis using the SCF Density.

 **********************************************************************

 Orbital symmetries:
       Occupied  (A1) (B1) (A1) (A1) (B2) (B2) (A1) (A1) (B1) (A1)
                 (B2) (A1) (B1) (A1) (B2) (A1) (A1) (B2) (B1) (A1)
                 (B2) (A1) (A2) (B1) (B1) (A2) (A1) (B2) (A1) (B2)
                 (B1)
       Virtual   (A1) (A2) (A1) (B2) (B1) (B2) (A1) (B1) (A2) (B2)
                 (A1) (A1) (B2) (A1) (B2) (A1) (B1) (A1) (B2) (A2)
                 (B1) (B2) (A1) (A1) (A1) (B1) (A2) (B2) (B1) (A2)
                 (A1) (B2) (A1) (B2) (A1) (A2) (B1) (B2) (A1) (B2)
                 (B1) (A1) (B2) (B1) (A1) (B2) (A2) (B2) (A1) (A2)
                 (B1) (B1) (B2) (A1) (A2) (B1) (B2) (A1) (A1) (B1)
                 (A2) (A1) (B2) (B1) (A2) (A1) (B2) (A1) (B1) (A2)
                 (B2) (A1) (A1) (B2) (B2) (B1) (A2) (A1) (A2) (A1)
                 (B1) (B1) (B2) (A1) (B2) (A2) (A1) (B1) (A1) (B2)
                 (B2) (B2) (A2) (A1) (B2) (A2) (A1) (B1) (B2) (A1)
                 (B1) (A1) (B2) (B1) (A2) (A1) (B1) (A1) (B2) (B2)
                 (A2) (A2) (A1) (B1) (A1) (B2) (A1) (B2) (B1) (B1)
                 (A1) (B2) (A1) (A2) (B1) (A2) (B2) (B1) (A1) (A1)
                 (B1) (B2) (A1) (B2) (A1) (B1) (B2) (A1) (B1) (A2)
                 (A1) (B1) (A2) (A2) (B2) (A1) (B1) (B2) (A1) (A2)
                 (A2) (B1) (B1) (A2) (A1) (B2) (B1) (A1) (B2) (A1)
                 (B2) (B2) (B1) (A2) (B2) (A1) (A2) (A1) (A2) (B1)
                 (B2) (B1) (A2) (B2) (A1) (A1) (B2) (A2) (B1) (B2)
                 (A1) (B1) (A1) (A2) (B1) (B2) (B2) (A1) (A1) (B2)
                 (B1) (B2) (A2) (A1) (A2) (B2) (B2) (A1) (A1) (B1)
                 (B2) (A1) (A2) (A1) (A2) (B2) (B1) (B2) (B1) (A2)
                 (A1) (A1) (A2) (B2) (A1) (A1) (B2) (B1) (A2) (B2)
                 (B1) (A2) (A1) (B1) (A1) (B2) (A1) (A2) (B2) (B1)
                 (A1) (B2) (A1) (B2) (B1) (A2) (B2) (B1) (A2) (B2)
                 (A2) (B1) (A1) (A1) (A1) (B2) (B1) (A2) (B2) (B1)
                 (A1) (B1) (A2) (A1) (B2) (B2) (B1) (A2) (A1) (A1)
                 (B1) (A1) (A1) (B1) (A1) (B2) (B2)
 The electronic state is 1-A1.
 Alpha  occ. eigenvalues --  -68.83872 -26.28875 -26.28874 -11.24498 -11.24331
 Alpha  occ. eigenvalues --  -11.22409 -11.22408  -6.17931  -4.28730  -4.28626
 Alpha  occ. eigenvalues --   -4.28505  -1.60090  -1.58158  -1.10783  -0.97723
 Alpha  occ. eigenvalues --   -0.90844  -0.77425  -0.73515  -0.71216  -0.69445
 Alpha  occ. eigenvalues --   -0.67387  -0.67146  -0.65680  -0.63954  -0.59245
 Alpha  occ. eigenvalues --   -0.56870  -0.55503  -0.51804  -0.51239  -0.42939
 Alpha  occ. eigenvalues --   -0.36342
 Alpha virt. eigenvalues --    0.13562   0.15668   0.16538   0.16778   0.18201
 Alpha virt. eigenvalues --    0.19982   0.20186   0.20206   0.21196   0.24780
 Alpha virt. eigenvalues --    0.29721   0.31860   0.34183   0.34336   0.38093
 Alpha virt. eigenvalues --    0.41289   0.42825   0.43736   0.44002   0.44724
 Alpha virt. eigenvalues --    0.46387   0.51309   0.51636   0.53561   0.54812
 Alpha virt. eigenvalues --    0.57170   0.58252   0.60777   0.61253   0.61750
 Alpha virt. eigenvalues --    0.62156   0.62316   0.63563   0.65001   0.65231
 Alpha virt. eigenvalues --    0.65729   0.71484   0.72985   0.75872   0.77029
 Alpha virt. eigenvalues --    0.79842   0.81314   0.83175   0.84768   0.88075
 Alpha virt. eigenvalues --    0.91993   0.94634   0.95326   1.00605   1.00684
 Alpha virt. eigenvalues --    1.02759   1.09347   1.09500   1.10041   1.12628
 Alpha virt. eigenvalues --    1.13944   1.14467   1.15507   1.17237   1.20613
 Alpha virt. eigenvalues --    1.21076   1.21550   1.21646   1.26946   1.28626
 Alpha virt. eigenvalues --    1.30300   1.30947   1.31159   1.31553   1.36419
 Alpha virt. eigenvalues --    1.37152   1.38580   1.39642   1.42721   1.45626
 Alpha virt. eigenvalues --    1.45937   1.47324   1.48278   1.49974   1.51598
 Alpha virt. eigenvalues --    1.52697   1.54925   1.55438   1.56272   1.57221
 Alpha virt. eigenvalues --    1.61083   1.64617   1.64706   1.67853   1.68313
 Alpha virt. eigenvalues --    1.69055   1.75135   1.75897   1.77888   1.78557
 Alpha virt. eigenvalues --    1.78740   1.84699   1.90301   1.92429   1.94684
 Alpha virt. eigenvalues --    1.97287   2.08695   2.23047   2.30786   2.36753
 Alpha virt. eigenvalues --    2.41481   2.45110   2.48067   2.50334   2.60994
 Alpha virt. eigenvalues --    2.61484   2.65999   2.67078   2.69859   2.70395
 Alpha virt. eigenvalues --    2.71194   2.73710   2.77208   2.82820   2.84890
 Alpha virt. eigenvalues --    2.87243   2.87320   2.92245   2.92251   2.94848
 Alpha virt. eigenvalues --    2.97051   2.99643   2.99735   3.01089   3.04238
 Alpha virt. eigenvalues --    3.06371   3.11166   3.12725   3.14479   3.14535
 Alpha virt. eigenvalues --    3.21555   3.21711   3.21993   3.22966   3.23843
 Alpha virt. eigenvalues --    3.30248   3.30320   3.30444   3.34183   3.37179
 Alpha virt. eigenvalues --    3.39130   3.40319   3.42176   3.43133   3.43846
 Alpha virt. eigenvalues --    3.49206   3.49519   3.49639   3.54799   3.54885
 Alpha virt. eigenvalues --    3.57399   3.60984   3.61000   3.61954   3.65864
 Alpha virt. eigenvalues --    3.67888   3.72224   3.73070   3.74520   3.78497
 Alpha virt. eigenvalues --    3.79481   3.80726   3.84558   3.88892   3.90992
 Alpha virt. eigenvalues --    3.91554   3.93128   3.93653   3.95544   3.95778
 Alpha virt. eigenvalues --    4.06477   4.08008   4.11938   4.12343   4.12725
 Alpha virt. eigenvalues --    4.12949   4.18809   4.20258   4.26760   4.30593
 Alpha virt. eigenvalues --    4.30631   4.35950   4.39939   4.40260   4.41708
 Alpha virt. eigenvalues --    4.44901   4.45781   4.45843   4.48243   4.49912
 Alpha virt. eigenvalues --    4.56851   4.62053   4.62182   4.64268   4.68424
 Alpha virt. eigenvalues --    4.75964   4.80530   4.81619   4.85987   4.91361
 Alpha virt. eigenvalues --    4.99324   5.06523   5.09427   5.14866   5.15984
 Alpha virt. eigenvalues --    5.17235   5.23272   5.27283   5.30155   5.31252
 Alpha virt. eigenvalues --    5.32325   5.33135   5.34223   5.34659   5.39096
 Alpha virt. eigenvalues --    5.39843   5.45212   5.45222   5.51928   5.54402
 Alpha virt. eigenvalues --    5.59901   5.65343   5.71927   5.76145   5.79920
 Alpha virt. eigenvalues --    5.90188   5.99617   6.09062   6.22136   6.29454
 Alpha virt. eigenvalues --    6.34652   6.41145   7.37224   7.37785   7.39020
 Alpha virt. eigenvalues --    7.39188   7.39247   7.40067   7.41623   7.43255
 Alpha virt. eigenvalues --    7.44611   7.45592   7.47292   7.47294   7.49809
 Alpha virt. eigenvalues --    7.52585   8.91488   8.93658   8.95308   8.99411
 Alpha virt. eigenvalues --    9.22858   9.22989   9.27981   9.32850   9.36567
 Alpha virt. eigenvalues --    9.42932  10.81550  11.83612  11.86829  12.51566
 Alpha virt. eigenvalues --   12.92754  14.31941
     Molecular Orbital Coefficients:
                           1         2         3         4         5
                        (A1)--O   (B1)--O   (A1)--O   (A1)--O   (B2)--O
     Eigenvalues --   -68.83872 -26.28875 -26.28874 -11.24498 -11.24331
   1 1   C  1S         -0.00000   0.00000  -0.00001   0.01015  -0.01177
   2        2S         -0.00002   0.00000  -0.00004  -0.00012  -0.00036
   3        3S         -0.00000   0.00000  -0.00002   0.00053  -0.00055
   4        4S         -0.00012   0.00000   0.00104   0.00092   0.00055
   5        5PX         0.00000  -0.00002   0.00000   0.00000   0.00000
   6        5PY         0.00001   0.00000  -0.00002  -0.00008  -0.00000
   7        5PZ        -0.00001   0.00000  -0.00003  -0.00014   0.00012
   8        6PX         0.00000  -0.00001   0.00000   0.00000   0.00000
   9        6PY        -0.00001   0.00000   0.00034   0.00004   0.00093
  10        6PZ         0.00001   0.00000   0.00010  -0.00023   0.00058
  11        7PX         0.00000  -0.00018   0.00000   0.00000   0.00000
  12        7PY        -0.00000   0.00000  -0.00039  -0.00028  -0.00012
  13        7PZ         0.00005   0.00000   0.00018   0.00069   0.00002
  14        8D 0        0.00000   0.00000  -0.00002  -0.00001  -0.00004
  15        8D+1        0.00000  -0.00002   0.00000   0.00000   0.00000
  16        8D-1        0.00000   0.00000   0.00002   0.00003  -0.00003
  17        8D+2        0.00000   0.00000   0.00001   0.00003   0.00002
  18        8D-2        0.00000  -0.00003   0.00000   0.00000   0.00000
  19        9D 0       -0.00000   0.00000  -0.00011   0.00017   0.00015
  20        9D+1        0.00000   0.00013   0.00000   0.00000   0.00000
  21        9D-1       -0.00002   0.00000  -0.00005  -0.00040  -0.00020
  22        9D+2       -0.00005   0.00000   0.00009   0.00005   0.00010
  23        9D-2        0.00000   0.00011   0.00000   0.00000   0.00000
  24       10F 0       -0.00000   0.00000   0.00000   0.00006  -0.00013
  25       10F+1        0.00000   0.00002   0.00000   0.00000   0.00000
  26       10F-1       -0.00001   0.00000  -0.00003   0.00014  -0.00020
  27       10F+2       -0.00001   0.00000   0.00001  -0.00011   0.00004
  28       10F-2        0.00000  -0.00003   0.00000   0.00000   0.00000
  29       10F+3        0.00000  -0.00001   0.00000   0.00000   0.00000
  30       10F-3        0.00000   0.00000   0.00001   0.00002  -0.00001
  31 2   H  1S         -0.00000  -0.00002   0.00002   0.00003  -0.00003
  32        2S          0.00004  -0.00001  -0.00040  -0.00012  -0.00017
  33        3S          0.00003   0.00025   0.00013  -0.00004   0.00002
  34        4PX        -0.00000  -0.00000   0.00002  -0.00001   0.00003
  35        4PY        -0.00000   0.00002   0.00000   0.00000   0.00001
  36        4PZ         0.00000  -0.00001   0.00000   0.00002  -0.00001
  37        5PX         0.00000   0.00001   0.00010   0.00000   0.00014
  38        5PY        -0.00002  -0.00008   0.00012   0.00005  -0.00002
  39        5PZ        -0.00000   0.00001   0.00002   0.00012  -0.00009
  40        6D 0        0.00000  -0.00001   0.00002  -0.00003   0.00003
  41        6D+1       -0.00000  -0.00000  -0.00000  -0.00004   0.00002
  42        6D-1        0.00000   0.00000  -0.00000  -0.00002   0.00005
  43        6D+2       -0.00000  -0.00001  -0.00000   0.00001  -0.00005
  44        6D-2        0.00000   0.00001  -0.00002  -0.00001  -0.00001
  45 3   H  1S         -0.00000   0.00002   0.00002   0.00003  -0.00003
  46        2S          0.00004   0.00001  -0.00040  -0.00012  -0.00017
  47        3S          0.00003  -0.00025   0.00013  -0.00004   0.00002
  48        4PX         0.00000  -0.00000  -0.00002   0.00001  -0.00003
  49        4PY        -0.00000  -0.00002   0.00000   0.00000   0.00001
  50        4PZ         0.00000   0.00001   0.00000   0.00002  -0.00001
  51        5PX        -0.00000   0.00001  -0.00010  -0.00000  -0.00014
  52        5PY        -0.00002   0.00008   0.00012   0.00005  -0.00002
  53        5PZ        -0.00000  -0.00001   0.00002   0.00012  -0.00009
  54        6D 0        0.00000   0.00001   0.00002  -0.00003   0.00003
  55        6D+1        0.00000  -0.00000   0.00000   0.00004  -0.00002
  56        6D-1        0.00000  -0.00000  -0.00000  -0.00002   0.00005
  57        6D+2       -0.00000   0.00001  -0.00000   0.00001  -0.00005
  58        6D-2       -0.00000   0.00001   0.00002   0.00001   0.00001
  59 4   H  1S         -0.00000   0.00002   0.00002   0.00003   0.00003
  60        2S          0.00004   0.00001  -0.00040  -0.00012   0.00017
  61        3S          0.00003  -0.00025   0.00013  -0.00004  -0.00002
  62        4PX         0.00000  -0.00000  -0.00002   0.00001   0.00003
  63        4PY         0.00000   0.00002  -0.00000  -0.00000   0.00001
  64        4PZ         0.00000   0.00001   0.00000   0.00002   0.00001
  65        5PX        -0.00000   0.00001  -0.00010  -0.00000   0.00014
  66        5PY         0.00002  -0.00008  -0.00012  -0.00005  -0.00002
  67        5PZ        -0.00000  -0.00001   0.00002   0.00012   0.00009
  68        6D 0        0.00000   0.00001   0.00002  -0.00003  -0.00003
  69        6D+1        0.00000  -0.00000   0.00000   0.00004   0.00002
  70        6D-1       -0.00000   0.00000   0.00000   0.00002   0.00005
  71        6D+2       -0.00000   0.00001  -0.00000   0.00001   0.00005
  72        6D-2        0.00000  -0.00001  -0.00002  -0.00001   0.00001
  73 5   H  1S         -0.00000  -0.00002   0.00002   0.00003   0.00003
  74        2S          0.00004  -0.00001  -0.00040  -0.00012   0.00017
  75        3S          0.00003   0.00025   0.00013  -0.00004  -0.00002
  76        4PX        -0.00000  -0.00000   0.00002  -0.00001  -0.00003
  77        4PY         0.00000  -0.00002  -0.00000  -0.00000   0.00001
  78        4PZ         0.00000  -0.00001   0.00000   0.00002   0.00001
  79        5PX         0.00000   0.00001   0.00010   0.00000  -0.00014
  80        5PY         0.00002   0.00008  -0.00012  -0.00005  -0.00002
  81        5PZ        -0.00000   0.00001   0.00002   0.00012   0.00009
  82        6D 0        0.00000  -0.00001   0.00002  -0.00003  -0.00003
  83        6D+1       -0.00000  -0.00000  -0.00000  -0.00004  -0.00002
  84        6D-1       -0.00000  -0.00000   0.00000   0.00002   0.00005
  85        6D+2       -0.00000  -0.00001  -0.00000   0.00001   0.00005
  86        6D-2       -0.00000  -0.00001   0.00002   0.00001  -0.00001
  87 6   C  1S         -0.00000   0.00000  -0.00001   0.01015   0.01177
  88        2S         -0.00002   0.00000  -0.00004  -0.00012   0.00036
  89        3S         -0.00000   0.00000  -0.00002   0.00053   0.00055
  90        4S         -0.00012   0.00000   0.00104   0.00092  -0.00055
  91        5PX         0.00000  -0.00002   0.00000   0.00000   0.00000
  92        5PY        -0.00001   0.00000   0.00002   0.00008  -0.00000
  93        5PZ        -0.00001   0.00000  -0.00003  -0.00014  -0.00012
  94        6PX         0.00000  -0.00001   0.00000   0.00000   0.00000
  95        6PY         0.00001   0.00000  -0.00034  -0.00004   0.00093
  96        6PZ         0.00001   0.00000   0.00010  -0.00023  -0.00058
  97        7PX         0.00000  -0.00018   0.00000   0.00000   0.00000
  98        7PY         0.00000   0.00000   0.00039   0.00028  -0.00012
  99        7PZ         0.00005   0.00000   0.00018   0.00069  -0.00002
 100        8D 0        0.00000   0.00000  -0.00002  -0.00001   0.00004
 101        8D+1        0.00000  -0.00002   0.00000   0.00000   0.00000
 102        8D-1       -0.00000   0.00000  -0.00002  -0.00003  -0.00003
 103        8D+2        0.00000   0.00000   0.00001   0.00003  -0.00002
 104        8D-2        0.00000   0.00003   0.00000   0.00000   0.00000
 105        9D 0       -0.00000   0.00000  -0.00011   0.00017  -0.00015
 106        9D+1        0.00000   0.00013   0.00000   0.00000   0.00000
 107        9D-1        0.00002   0.00000   0.00005   0.00040  -0.00020
 108        9D+2       -0.00005   0.00000   0.00009   0.00005  -0.00010
 109        9D-2        0.00000  -0.00011   0.00000   0.00000   0.00000
 110       10F 0       -0.00000   0.00000   0.00000   0.00006   0.00013
 111       10F+1        0.00000   0.00002   0.00000   0.00000   0.00000
 112       10F-1        0.00001   0.00000   0.00003  -0.00014  -0.00020
 113       10F+2       -0.00001   0.00000   0.00001  -0.00011  -0.00004
 114       10F-2        0.00000   0.00003   0.00000   0.00000   0.00000
 115       10F+3        0.00000  -0.00001   0.00000   0.00000   0.00000
 116       10F-3       -0.00000   0.00000  -0.00001  -0.00002  -0.00001
 117 7   C  1S         -0.00000   0.00000  -0.00002   0.69175   0.69219
 118        2S         -0.00001   0.00000  -0.00008  -0.00541  -0.00452
 119        3S          0.00000   0.00000   0.00002   0.02941   0.02923
 120        4S          0.00009   0.00000  -0.00026   0.00253   0.00565
 121        5PX         0.00000  -0.00001   0.00000   0.00000   0.00000
 122        5PY         0.00000   0.00000  -0.00000  -0.00015  -0.00064
 123        5PZ        -0.00000   0.00000   0.00001   0.00012   0.00012
 124        6PX         0.00000   0.00006   0.00000   0.00000   0.00000
 125        6PY        -0.00002   0.00000  -0.00002   0.00050   0.00390
 126        6PZ         0.00001   0.00000   0.00004  -0.00027   0.00017
 127        7PX         0.00000   0.00006   0.00000   0.00000   0.00000
 128        7PY        -0.00001   0.00000   0.00010  -0.00037   0.00217
 129        7PZ         0.00005   0.00000   0.00005   0.00006   0.00118
 130        8D 0        0.00000   0.00000   0.00001   0.00016   0.00007
 131        8D+1        0.00000   0.00000   0.00000   0.00000   0.00000
 132        8D-1        0.00000   0.00000   0.00002   0.00011   0.00010
 133        8D+2        0.00000   0.00000   0.00001  -0.00031  -0.00069
 134        8D-2        0.00000   0.00001   0.00000   0.00000   0.00000
 135        9D 0       -0.00001   0.00000  -0.00005   0.00019  -0.00210
 136        9D+1        0.00000   0.00002   0.00000   0.00000   0.00000
 137        9D-1       -0.00002   0.00000  -0.00011   0.00006  -0.00062
 138        9D+2       -0.00001   0.00000  -0.00005   0.00019  -0.00111
 139        9D-2        0.00000  -0.00004   0.00000   0.00000   0.00000
 140       10F 0       -0.00000   0.00000   0.00001  -0.00002   0.00000
 141       10F+1        0.00000   0.00001   0.00000   0.00000   0.00000
 142       10F-1       -0.00000   0.00000  -0.00002  -0.00030  -0.00059
 143       10F+2        0.00000   0.00000  -0.00001   0.00005   0.00005
 144       10F-2        0.00000  -0.00001   0.00000   0.00000   0.00000
 145       10F+3        0.00000   0.00000   0.00000   0.00000   0.00000
 146       10F-3       -0.00000   0.00000  -0.00001   0.00000  -0.00035
 147 8   H  1S         -0.00000   0.00000  -0.00000   0.00009   0.00011
 148        2S          0.00001   0.00000   0.00015  -0.00008   0.00250
 149        3S          0.00002   0.00000   0.00009  -0.00046   0.00038
 150        4PX         0.00000   0.00001   0.00000   0.00000   0.00000
 151        4PY        -0.00000   0.00000   0.00000  -0.00013  -0.00010
 152        4PZ        -0.00000   0.00000  -0.00001  -0.00019  -0.00017
 153        5PX         0.00000  -0.00003   0.00000   0.00000   0.00000
 154        5PY         0.00001   0.00000   0.00001  -0.00013   0.00073
 155        5PZ        -0.00000   0.00000   0.00004   0.00002   0.00060
 156        6D 0       -0.00000   0.00000  -0.00000  -0.00008  -0.00012
 157        6D+1        0.00000  -0.00000   0.00000   0.00000   0.00000
 158        6D-1       -0.00000   0.00000  -0.00000  -0.00017  -0.00011
 159        6D+2        0.00000   0.00000   0.00001   0.00002   0.00000
 160        6D-2        0.00000  -0.00000   0.00000   0.00000   0.00000
 161 9   C  1S         -0.00000   0.00000  -0.00002   0.69175  -0.69219
 162        2S         -0.00001   0.00000  -0.00008  -0.00541   0.00452
 163        3S          0.00000   0.00000   0.00002   0.02941  -0.02923
 164        4S          0.00009   0.00000  -0.00026   0.00253  -0.00565
 165        5PX         0.00000  -0.00001   0.00000   0.00000   0.00000
 166        5PY        -0.00000   0.00000   0.00000   0.00015  -0.00064
 167        5PZ        -0.00000   0.00000   0.00001   0.00012  -0.00012
 168        6PX         0.00000   0.00006   0.00000   0.00000   0.00000
 169        6PY         0.00002   0.00000   0.00002  -0.00050   0.00390
 170        6PZ         0.00001   0.00000   0.00004  -0.00027  -0.00017
 171        7PX         0.00000   0.00006   0.00000   0.00000   0.00000
 172        7PY         0.00001   0.00000  -0.00010   0.00037   0.00217
 173        7PZ         0.00005   0.00000   0.00005   0.00006  -0.00118
 174        8D 0        0.00000   0.00000   0.00001   0.00016  -0.00007
 175        8D+1        0.00000   0.00000   0.00000   0.00000   0.00000
 176        8D-1       -0.00000   0.00000  -0.00002  -0.00011   0.00010
 177        8D+2        0.00000   0.00000   0.00001  -0.00031   0.00069
 178        8D-2        0.00000  -0.00001   0.00000   0.00000   0.00000
 179        9D 0       -0.00001   0.00000  -0.00005   0.00019   0.00210
 180        9D+1        0.00000   0.00002   0.00000   0.00000   0.00000
 181        9D-1        0.00002   0.00000   0.00011  -0.00006  -0.00062
 182        9D+2       -0.00001   0.00000  -0.00005   0.00019   0.00111
 183        9D-2        0.00000   0.00004   0.00000   0.00000   0.00000
 184       10F 0       -0.00000   0.00000   0.00001  -0.00002  -0.00000
 185       10F+1        0.00000   0.00001   0.00000   0.00000   0.00000
 186       10F-1        0.00000   0.00000   0.00002   0.00030  -0.00059
 187       10F+2        0.00000   0.00000  -0.00001   0.00005  -0.00005
 188       10F-2        0.00000   0.00001   0.00000   0.00000   0.00000
 189       10F+3        0.00000   0.00000   0.00000   0.00000   0.00000
 190       10F-3        0.00000   0.00000   0.00001  -0.00000  -0.00035
 191 10  H  1S         -0.00000   0.00000  -0.00000   0.00009  -0.00011
 192        2S          0.00001   0.00000   0.00015  -0.00008  -0.00250
 193        3S          0.00002   0.00000   0.00009  -0.00046  -0.00038
 194        4PX         0.00000   0.00001   0.00000   0.00000   0.00000
 195        4PY         0.00000   0.00000  -0.00000   0.00013  -0.00010
 196        4PZ        -0.00000   0.00000  -0.00001  -0.00019   0.00017
 197        5PX         0.00000  -0.00003   0.00000   0.00000   0.00000
 198        5PY        -0.00001   0.00000  -0.00001   0.00013   0.00073
 199        5PZ        -0.00000   0.00000   0.00004   0.00002  -0.00060
 200        6D 0       -0.00000   0.00000  -0.00000  -0.00008   0.00012
 201        6D+1        0.00000  -0.00000   0.00000   0.00000   0.00000
 202        6D-1        0.00000   0.00000   0.00000   0.00017  -0.00011
 203        6D+2        0.00000   0.00000   0.00001   0.00002  -0.00000
 204        6D-2        0.00000   0.00000   0.00000   0.00000   0.00000
 205 11  Si 1S          1.00207   0.00000   0.00000  -0.00001   0.00000
 206        2S         -0.00718   0.00000  -0.00017  -0.00000   0.00000
 207        3S          0.00075   0.00000  -0.00038  -0.00016   0.00000
 208        4S         -0.00121   0.00000  -0.00003  -0.00007   0.00000
 209        5S         -0.00024   0.00000  -0.00194  -0.00175   0.00000
 210        6PX         0.00000  -0.00008   0.00000   0.00000   0.00000
 211        6PY         0.00000   0.00000   0.00000   0.00000  -0.00002
 212        6PZ         0.00007   0.00000  -0.00005   0.00001   0.00000
 213        7PX         0.00000  -0.00040   0.00000   0.00000   0.00000
 214        7PY         0.00000   0.00000   0.00000   0.00000  -0.00020
 215        7PZ         0.00010   0.00000  -0.00015   0.00049   0.00000
 216        8PX         0.00000   0.00001   0.00000   0.00000   0.00000
 217        8PY         0.00000   0.00000   0.00000   0.00000   0.00006
 218        8PZ        -0.00005   0.00000  -0.00001  -0.00000   0.00000
 219        9PX         0.00000  -0.00081   0.00000   0.00000   0.00000
 220        9PY         0.00000   0.00000   0.00000   0.00000  -0.00005
 221        9PZ         0.00005   0.00000  -0.00003   0.00074   0.00000
 222       10D 0        0.00000   0.00000   0.00003   0.00041   0.00000
 223       10D+1        0.00000  -0.00059   0.00000   0.00000   0.00000
 224       10D-1        0.00000   0.00000   0.00000   0.00000   0.00004
 225       10D+2        0.00005   0.00000  -0.00024   0.00033   0.00000
 226       10D-2        0.00000   0.00000   0.00000   0.00000   0.00000
 227       11D 0       -0.00001   0.00000  -0.00001  -0.00008   0.00000
 228       11D+1        0.00000   0.00022   0.00000   0.00000   0.00000
 229       11D-1        0.00000   0.00000   0.00000   0.00000  -0.00001
 230       11D+2        0.00001   0.00000   0.00014   0.00006   0.00000
 231       11D-2        0.00000   0.00000   0.00000   0.00000   0.00000
 232       12F 0       -0.00001   0.00000  -0.00019  -0.00020   0.00000
 233       12F+1        0.00000   0.00023   0.00000   0.00000   0.00000
 234       12F-1        0.00000   0.00000   0.00000   0.00000   0.00009
 235       12F+2        0.00001   0.00000   0.00028   0.00004   0.00000
 236       12F-2        0.00000   0.00000   0.00000   0.00000   0.00000
 237       12F+3        0.00000   0.00012   0.00000   0.00000   0.00000
 238       12F-3        0.00000   0.00000   0.00000   0.00000   0.00010
 239 12  F  1S          0.00001   0.69053   0.69053  -0.00001   0.00000
 240        2S          0.00002  -0.00589  -0.00588  -0.00005   0.00000
 241        3S         -0.00001   0.03088   0.03086   0.00002   0.00000
 242        4S         -0.00010   0.00308   0.00292  -0.00008   0.00000
 243        5PX         0.00001  -0.00052  -0.00050   0.00000   0.00000
 244        5PY         0.00000   0.00000   0.00000   0.00000   0.00000
 245        5PZ         0.00000  -0.00039  -0.00040  -0.00002   0.00000
 246        6PX        -0.00001   0.00033   0.00031   0.00000   0.00000
 247        6PY         0.00000   0.00000   0.00000   0.00000  -0.00001
 248        6PZ        -0.00000   0.00024   0.00027   0.00008   0.00000
 249        7PX         0.00004  -0.00038  -0.00043   0.00013   0.00000
 250        7PY         0.00000   0.00000   0.00000   0.00000  -0.00002
 251        7PZ         0.00003  -0.00041  -0.00032  -0.00012   0.00000
 252        8D 0       -0.00000  -0.00001   0.00000  -0.00000   0.00000
 253        8D+1       -0.00000  -0.00001  -0.00000   0.00000   0.00000
 254        8D-1        0.00000   0.00000   0.00000   0.00000  -0.00000
 255        8D+2       -0.00000   0.00000  -0.00002   0.00000   0.00000
 256        8D-2        0.00000   0.00000   0.00000   0.00000  -0.00000
 257        9D 0        0.00000   0.00004  -0.00002   0.00000   0.00000
 258        9D+1        0.00001   0.00003  -0.00000  -0.00002   0.00000
 259        9D-1        0.00000   0.00000   0.00000   0.00000   0.00001
 260        9D+2        0.00000  -0.00003   0.00005  -0.00001   0.00000
 261        9D-2        0.00000   0.00000   0.00000   0.00000   0.00001
 262       10F 0        0.00000   0.00000   0.00000  -0.00000   0.00000
 263       10F+1       -0.00000  -0.00001   0.00000   0.00000   0.00000
 264       10F-1        0.00000   0.00000   0.00000   0.00000  -0.00000
 265       10F+2       -0.00001  -0.00000  -0.00001   0.00000   0.00000
 266       10F-2        0.00000   0.00000   0.00000   0.00000  -0.00000
 267       10F+3       -0.00000   0.00000  -0.00001  -0.00000   0.00000
 268       10F-3        0.00000   0.00000   0.00000   0.00000  -0.00000
 269 13  F  1S          0.00001  -0.69053   0.69053  -0.00001   0.00000
 270        2S          0.00002   0.00589  -0.00588  -0.00005   0.00000
 271        3S         -0.00001  -0.03088   0.03086   0.00002   0.00000
 272        4S         -0.00010  -0.00308   0.00292  -0.00008   0.00000
 273        5PX        -0.00001  -0.00052   0.00050  -0.00000   0.00000
 274        5PY         0.00000   0.00000   0.00000   0.00000   0.00000
 275        5PZ         0.00000   0.00039  -0.00040  -0.00002   0.00000
 276        6PX         0.00001   0.00033  -0.00031  -0.00000   0.00000
 277        6PY         0.00000   0.00000   0.00000   0.00000  -0.00001
 278        6PZ        -0.00000  -0.00024   0.00027   0.00008   0.00000
 279        7PX        -0.00004  -0.00038   0.00043  -0.00013   0.00000
 280        7PY         0.00000   0.00000   0.00000   0.00000  -0.00002
 281        7PZ         0.00003   0.00041  -0.00032  -0.00012   0.00000
 282        8D 0       -0.00000   0.00001   0.00000  -0.00000   0.00000
 283        8D+1        0.00000  -0.00001   0.00000  -0.00000   0.00000
 284        8D-1        0.00000   0.00000   0.00000   0.00000  -0.00000
 285        8D+2       -0.00000  -0.00000  -0.00002   0.00000   0.00000
 286        8D-2        0.00000   0.00000   0.00000   0.00000   0.00000
 287        9D 0        0.00000  -0.00004  -0.00002   0.00000   0.00000
 288        9D+1       -0.00001   0.00003   0.00000   0.00002   0.00000
 289        9D-1        0.00000   0.00000   0.00000   0.00000   0.00001
 290        9D+2        0.00000   0.00003   0.00005  -0.00001   0.00000
 291        9D-2        0.00000   0.00000   0.00000   0.00000  -0.00001
 292       10F 0        0.00000  -0.00000   0.00000  -0.00000   0.00000
 293       10F+1        0.00000  -0.00001  -0.00000  -0.00000   0.00000
 294       10F-1        0.00000   0.00000   0.00000   0.00000  -0.00000
 295       10F+2       -0.00001   0.00000  -0.00001   0.00000   0.00000
 296       10F-2        0.00000   0.00000   0.00000   0.00000   0.00000
 297       10F+3        0.00000   0.00000   0.00001   0.00000   0.00000
 298       10F-3        0.00000   0.00000   0.00000   0.00000  -0.00000
                           6         7         8         9        10
                        (B2)--O   (A1)--O   (A1)--O   (B1)--O   (A1)--O
     Eigenvalues --   -11.22409 -11.22408  -6.17931  -4.28730  -4.28626
   1 1   C  1S          0.69190   0.69189  -0.00015   0.00000   0.00034
   2        2S         -0.00496  -0.00520   0.00033   0.00000  -0.00078
   3        3S          0.02933   0.02934   0.00000   0.00000   0.00003
   4        4S          0.00500   0.00550   0.00123   0.00000   0.00074
   5        5PX         0.00000   0.00000   0.00000   0.00003   0.00000
   6        5PY         0.00000  -0.00001  -0.00013   0.00000   0.00028
   7        5PZ        -0.00016  -0.00017   0.00010   0.00000  -0.00026
   8        6PX         0.00000   0.00000   0.00000   0.00026   0.00000
   9        6PY         0.00090   0.00101  -0.00019   0.00000   0.00131
  10        6PZ        -0.00023  -0.00014   0.00025   0.00000  -0.00059
  11        7PX         0.00000   0.00000   0.00000   0.00027   0.00000
  12        7PY         0.00011  -0.00047  -0.00005   0.00000   0.00015
  13        7PZ        -0.00069  -0.00033  -0.00051   0.00000  -0.00076
  14        8D 0       -0.00018  -0.00019  -0.00002   0.00000  -0.00004
  15        8D+1        0.00000   0.00000   0.00000  -0.00000   0.00000
  16        8D-1        0.00010   0.00010  -0.00002   0.00000   0.00024
  17        8D+2        0.00007   0.00006  -0.00005   0.00000   0.00013
  18        8D-2        0.00000   0.00000   0.00000  -0.00003   0.00000
  19        9D 0       -0.00018  -0.00022   0.00022   0.00000   0.00019
  20        9D+1        0.00000   0.00000   0.00000   0.00071   0.00000
  21        9D-1        0.00026   0.00018  -0.00029   0.00000   0.00022
  22        9D+2        0.00037   0.00040   0.00026   0.00000   0.00084
  23        9D-2        0.00000   0.00000   0.00000  -0.00049   0.00000
  24       10F 0       -0.00011  -0.00009  -0.00003   0.00000   0.00009
  25       10F+1        0.00000   0.00000   0.00000   0.00011   0.00000
  26       10F-1       -0.00027  -0.00029  -0.00009   0.00000  -0.00002
  27       10F+2        0.00008   0.00007  -0.00007   0.00000   0.00012
  28       10F-2        0.00000   0.00000   0.00000  -0.00014   0.00000
  29       10F+3        0.00000   0.00000   0.00000  -0.00008   0.00000
  30       10F-3        0.00038   0.00037   0.00004   0.00000  -0.00010
  31 2   H  1S          0.00014   0.00014  -0.00002   0.00005   0.00003
  32        2S         -0.00102  -0.00105  -0.00020   0.00010  -0.00047
  33        3S         -0.00062  -0.00036  -0.00030  -0.00011  -0.00012
  34        4PX         0.00019   0.00020   0.00002  -0.00000   0.00000
  35        4PY         0.00014   0.00015   0.00001  -0.00002  -0.00002
  36        4PZ         0.00002   0.00002   0.00000   0.00001   0.00000
  37        5PX         0.00031   0.00029  -0.00004  -0.00006   0.00003
  38        5PY         0.00038   0.00036   0.00013   0.00008   0.00033
  39        5PZ         0.00002   0.00004   0.00008  -0.00023   0.00006
  40        6D 0        0.00012   0.00011  -0.00001   0.00001  -0.00000
  41        6D+1       -0.00002  -0.00003  -0.00001   0.00001  -0.00001
  42        6D-1       -0.00001  -0.00002  -0.00003   0.00005  -0.00001
  43        6D+2       -0.00003  -0.00003   0.00000   0.00001   0.00002
  44        6D-2       -0.00020  -0.00020  -0.00001   0.00000  -0.00004
  45 3   H  1S          0.00014   0.00014  -0.00002  -0.00005   0.00003
  46        2S         -0.00102  -0.00105  -0.00020  -0.00010  -0.00047
  47        3S         -0.00062  -0.00036  -0.00030   0.00011  -0.00012
  48        4PX        -0.00019  -0.00020  -0.00002  -0.00000  -0.00000
  49        4PY         0.00014   0.00015   0.00001   0.00002  -0.00002
  50        4PZ         0.00002   0.00002   0.00000  -0.00001   0.00000
  51        5PX        -0.00031  -0.00029   0.00004  -0.00006  -0.00003
  52        5PY         0.00038   0.00036   0.00013  -0.00008   0.00033
  53        5PZ         0.00002   0.00004   0.00008   0.00023   0.00006
  54        6D 0        0.00012   0.00011  -0.00001  -0.00001  -0.00000
  55        6D+1        0.00002   0.00003   0.00001   0.00001   0.00001
  56        6D-1       -0.00001  -0.00002  -0.00003  -0.00005  -0.00001
  57        6D+2       -0.00003  -0.00003   0.00000  -0.00001   0.00002
  58        6D-2        0.00020   0.00020   0.00001   0.00000   0.00004
  59 4   H  1S         -0.00014   0.00014  -0.00002  -0.00005   0.00003
  60        2S          0.00102  -0.00105  -0.00020  -0.00010  -0.00047
  61        3S          0.00062  -0.00036  -0.00030   0.00011  -0.00012
  62        4PX         0.00019  -0.00020  -0.00002  -0.00000  -0.00000
  63        4PY         0.00014  -0.00015  -0.00001  -0.00002   0.00002
  64        4PZ        -0.00002   0.00002   0.00000  -0.00001   0.00000
  65        5PX         0.00031  -0.00029   0.00004  -0.00006  -0.00003
  66        5PY         0.00038  -0.00036  -0.00013   0.00008  -0.00033
  67        5PZ        -0.00002   0.00004   0.00008   0.00023   0.00006
  68        6D 0       -0.00012   0.00011  -0.00001  -0.00001  -0.00000
  69        6D+1       -0.00002   0.00003   0.00001   0.00001   0.00001
  70        6D-1       -0.00001   0.00002   0.00003   0.00005   0.00001
  71        6D+2        0.00003  -0.00003   0.00000  -0.00001   0.00002
  72        6D-2        0.00020  -0.00020  -0.00001  -0.00000  -0.00004
  73 5   H  1S         -0.00014   0.00014  -0.00002   0.00005   0.00003
  74        2S          0.00102  -0.00105  -0.00020   0.00010  -0.00047
  75        3S          0.00062  -0.00036  -0.00030  -0.00011  -0.00012
  76        4PX        -0.00019   0.00020   0.00002  -0.00000   0.00000
  77        4PY         0.00014  -0.00015  -0.00001   0.00002   0.00002
  78        4PZ        -0.00002   0.00002   0.00000   0.00001   0.00000
  79        5PX        -0.00031   0.00029  -0.00004  -0.00006   0.00003
  80        5PY         0.00038  -0.00036  -0.00013  -0.00008  -0.00033
  81        5PZ        -0.00002   0.00004   0.00008  -0.00023   0.00006
  82        6D 0       -0.00012   0.00011  -0.00001   0.00001  -0.00000
  83        6D+1        0.00002  -0.00003  -0.00001   0.00001  -0.00001
  84        6D-1       -0.00001   0.00002   0.00003  -0.00005   0.00001
  85        6D+2        0.00003  -0.00003   0.00000   0.00001   0.00002
  86        6D-2       -0.00020   0.00020   0.00001  -0.00000   0.00004
  87 6   C  1S         -0.69190   0.69189  -0.00015   0.00000   0.00034
  88        2S          0.00496  -0.00520   0.00033   0.00000  -0.00078
  89        3S         -0.02933   0.02934   0.00000   0.00000   0.00003
  90        4S         -0.00500   0.00550   0.00123   0.00000   0.00074
  91        5PX         0.00000   0.00000   0.00000   0.00003   0.00000
  92        5PY         0.00000   0.00001   0.00013   0.00000  -0.00028
  93        5PZ         0.00016  -0.00017   0.00010   0.00000  -0.00026
  94        6PX         0.00000   0.00000   0.00000   0.00026   0.00000
  95        6PY         0.00090  -0.00101   0.00019   0.00000  -0.00131
  96        6PZ         0.00023  -0.00014   0.00025   0.00000  -0.00059
  97        7PX         0.00000   0.00000   0.00000   0.00027   0.00000
  98        7PY         0.00011   0.00047   0.00005   0.00000  -0.00015
  99        7PZ         0.00069  -0.00033  -0.00051   0.00000  -0.00076
 100        8D 0        0.00018  -0.00019  -0.00002   0.00000  -0.00004
 101        8D+1        0.00000   0.00000   0.00000  -0.00000   0.00000
 102        8D-1        0.00010  -0.00010   0.00002   0.00000  -0.00024
 103        8D+2       -0.00007   0.00006  -0.00005   0.00000   0.00013
 104        8D-2        0.00000   0.00000   0.00000   0.00003   0.00000
 105        9D 0        0.00018  -0.00022   0.00022   0.00000   0.00019
 106        9D+1        0.00000   0.00000   0.00000   0.00071   0.00000
 107        9D-1        0.00026  -0.00018   0.00029   0.00000  -0.00022
 108        9D+2       -0.00037   0.00040   0.00026   0.00000   0.00084
 109        9D-2        0.00000   0.00000   0.00000   0.00049   0.00000
 110       10F 0        0.00011  -0.00009  -0.00003   0.00000   0.00009
 111       10F+1        0.00000   0.00000   0.00000   0.00011   0.00000
 112       10F-1       -0.00027   0.00029   0.00009   0.00000   0.00002
 113       10F+2       -0.00008   0.00007  -0.00007   0.00000   0.00012
 114       10F-2        0.00000   0.00000   0.00000   0.00014   0.00000
 115       10F+3        0.00000   0.00000   0.00000  -0.00008   0.00000
 116       10F-3        0.00038  -0.00037  -0.00004   0.00000   0.00010
 117 7   C  1S          0.01186  -0.01029   0.00001   0.00000   0.00002
 118        2S         -0.00025   0.00045   0.00008   0.00000  -0.00003
 119        3S          0.00036  -0.00026   0.00007   0.00000   0.00001
 120        4S          0.00076  -0.00141  -0.00173   0.00000  -0.00117
 121        5PX         0.00000   0.00000   0.00000  -0.00001   0.00000
 122        5PY         0.00012  -0.00008  -0.00002   0.00000  -0.00001
 123        5PZ        -0.00015   0.00017  -0.00002   0.00000  -0.00006
 124        6PX         0.00000   0.00000   0.00000   0.00015   0.00000
 125        6PY        -0.00008  -0.00010   0.00041   0.00000   0.00035
 126        6PZ        -0.00023  -0.00015   0.00041   0.00000   0.00040
 127        7PX         0.00000   0.00000   0.00000  -0.00002   0.00000
 128        7PY        -0.00089   0.00008   0.00015   0.00000   0.00047
 129        7PZ         0.00071  -0.00099  -0.00055   0.00000  -0.00007
 130        8D 0        0.00000  -0.00001  -0.00001   0.00000  -0.00001
 131        8D+1        0.00000   0.00000   0.00000   0.00001   0.00000
 132        8D-1        0.00003  -0.00001  -0.00001   0.00000  -0.00001
 133        8D+2       -0.00005   0.00000  -0.00003   0.00000  -0.00002
 134        8D-2        0.00000   0.00000   0.00000   0.00001   0.00000
 135        9D 0        0.00015  -0.00011   0.00003   0.00000   0.00012
 136        9D+1        0.00000   0.00000   0.00000  -0.00001   0.00000
 137        9D-1       -0.00061   0.00018  -0.00006   0.00000  -0.00001
 138        9D+2        0.00009  -0.00000   0.00029   0.00000   0.00018
 139        9D-2        0.00000   0.00000   0.00000  -0.00014   0.00000
 140       10F 0        0.00010  -0.00004   0.00006   0.00000   0.00006
 141       10F+1        0.00000   0.00000   0.00000  -0.00001   0.00000
 142       10F-1       -0.00026   0.00016   0.00008   0.00000   0.00005
 143       10F+2       -0.00004   0.00007   0.00000   0.00000  -0.00000
 144       10F-2        0.00000   0.00000   0.00000  -0.00003   0.00000
 145       10F+3        0.00000   0.00000   0.00000  -0.00002   0.00000
 146       10F-3        0.00000   0.00001   0.00002   0.00000   0.00002
 147 8   H  1S         -0.00003   0.00005  -0.00000   0.00000  -0.00002
 148        2S          0.00018  -0.00034   0.00068   0.00000   0.00056
 149        3S         -0.00003  -0.00039  -0.00003   0.00000   0.00014
 150        4PX         0.00000   0.00000   0.00000   0.00000   0.00000
 151        4PY        -0.00003   0.00002   0.00003   0.00000   0.00003
 152        4PZ        -0.00004   0.00001   0.00002   0.00000   0.00002
 153        5PX         0.00000   0.00000   0.00000  -0.00004   0.00000
 154        5PY        -0.00011  -0.00003   0.00009   0.00000   0.00005
 155        5PZ         0.00011  -0.00017   0.00033   0.00000   0.00026
 156        6D 0        0.00001  -0.00004   0.00003   0.00000   0.00002
 157        6D+1        0.00000   0.00000   0.00000  -0.00001   0.00000
 158        6D-1       -0.00005   0.00002   0.00003   0.00000   0.00003
 159        6D+2       -0.00001   0.00001  -0.00002   0.00000  -0.00001
 160        6D-2        0.00000   0.00000   0.00000   0.00000   0.00000
 161 9   C  1S         -0.01186  -0.01029   0.00001   0.00000   0.00002
 162        2S          0.00025   0.00045   0.00008   0.00000  -0.00003
 163        3S         -0.00036  -0.00026   0.00007   0.00000   0.00001
 164        4S         -0.00076  -0.00141  -0.00173   0.00000  -0.00117
 165        5PX         0.00000   0.00000   0.00000  -0.00001   0.00000
 166        5PY         0.00012   0.00008   0.00002   0.00000   0.00001
 167        5PZ         0.00015   0.00017  -0.00002   0.00000  -0.00006
 168        6PX         0.00000   0.00000   0.00000   0.00015   0.00000
 169        6PY        -0.00008   0.00010  -0.00041   0.00000  -0.00035
 170        6PZ         0.00023  -0.00015   0.00041   0.00000   0.00040
 171        7PX         0.00000   0.00000   0.00000  -0.00002   0.00000
 172        7PY        -0.00089  -0.00008  -0.00015   0.00000  -0.00047
 173        7PZ        -0.00071  -0.00099  -0.00055   0.00000  -0.00007
 174        8D 0       -0.00000  -0.00001  -0.00001   0.00000  -0.00001
 175        8D+1        0.00000   0.00000   0.00000   0.00001   0.00000
 176        8D-1        0.00003   0.00001   0.00001   0.00000   0.00001
 177        8D+2        0.00005   0.00000  -0.00003   0.00000  -0.00002
 178        8D-2        0.00000   0.00000   0.00000  -0.00001   0.00000
 179        9D 0       -0.00015  -0.00011   0.00003   0.00000   0.00012
 180        9D+1        0.00000   0.00000   0.00000  -0.00001   0.00000
 181        9D-1       -0.00061  -0.00018   0.00006   0.00000   0.00001
 182        9D+2       -0.00009  -0.00000   0.00029   0.00000   0.00018
 183        9D-2        0.00000   0.00000   0.00000   0.00014   0.00000
 184       10F 0       -0.00010  -0.00004   0.00006   0.00000   0.00006
 185       10F+1        0.00000   0.00000   0.00000  -0.00001   0.00000
 186       10F-1       -0.00026  -0.00016  -0.00008   0.00000  -0.00005
 187       10F+2        0.00004   0.00007   0.00000   0.00000  -0.00000
 188       10F-2        0.00000   0.00000   0.00000   0.00003   0.00000
 189       10F+3        0.00000   0.00000   0.00000  -0.00002   0.00000
 190       10F-3        0.00000  -0.00001  -0.00002   0.00000  -0.00002
 191 10  H  1S          0.00003   0.00005  -0.00000   0.00000  -0.00002
 192        2S         -0.00018  -0.00034   0.00068   0.00000   0.00056
 193        3S          0.00003  -0.00039  -0.00003   0.00000   0.00014
 194        4PX         0.00000   0.00000   0.00000   0.00000   0.00000
 195        4PY        -0.00003  -0.00002  -0.00003   0.00000  -0.00003
 196        4PZ         0.00004   0.00001   0.00002   0.00000   0.00002
 197        5PX         0.00000   0.00000   0.00000  -0.00004   0.00000
 198        5PY        -0.00011   0.00003  -0.00009   0.00000  -0.00005
 199        5PZ        -0.00011  -0.00017   0.00033   0.00000   0.00026
 200        6D 0       -0.00001  -0.00004   0.00003   0.00000   0.00002
 201        6D+1        0.00000   0.00000   0.00000  -0.00001   0.00000
 202        6D-1       -0.00005  -0.00002  -0.00003   0.00000  -0.00003
 203        6D+2        0.00001   0.00001  -0.00002   0.00000  -0.00001
 204        6D-2        0.00000   0.00000   0.00000  -0.00000   0.00000
 205 11  Si 1S          0.00000   0.00002  -0.26720   0.00000   0.00163
 206        2S          0.00000   0.00003   1.00313   0.00000  -0.00784
 207        3S          0.00000   0.00062  -0.01329   0.00000  -0.00170
 208        4S          0.00000  -0.00017   0.05102   0.00000   0.00256
 209        5S          0.00000  -0.00121   0.00388   0.00000   0.00080
 210        6PX         0.00000   0.00000   0.00000   0.92028   0.00000
 211        6PY        -0.00006   0.00000   0.00000   0.00000   0.00000
 212        6PZ         0.00000   0.00003   0.00464   0.00000   0.92076
 213        7PX         0.00000   0.00000   0.00000   0.00322   0.00000
 214        7PY         0.00061   0.00000   0.00000   0.00000   0.00000
 215        7PZ         0.00000  -0.00042  -0.00123   0.00000   0.00172
 216        8PX         0.00000   0.00000   0.00000   0.13315   0.00000
 217        8PY         0.00005   0.00000   0.00000   0.00000   0.00000
 218        8PZ         0.00000  -0.00000   0.00205   0.00000   0.13246
 219        9PX         0.00000   0.00000   0.00000  -0.00013   0.00000
 220        9PY         0.00024   0.00000   0.00000   0.00000   0.00000
 221        9PZ         0.00000   0.00033  -0.00101   0.00000  -0.00004
 222       10D 0        0.00000   0.00039   0.00037   0.00000  -0.00069
 223       10D+1        0.00000   0.00000   0.00000   0.00038   0.00000
 224       10D-1       -0.00045   0.00000   0.00000   0.00000   0.00000
 225       10D+2        0.00000  -0.00025  -0.00080   0.00000  -0.00023
 226       10D-2        0.00000   0.00000   0.00000   0.00000   0.00000
 227       11D 0        0.00000   0.00005   0.00002   0.00000   0.00118
 228       11D+1        0.00000   0.00000   0.00000   0.00150   0.00000
 229       11D-1       -0.00034   0.00000   0.00000   0.00000   0.00000
 230       11D+2        0.00000  -0.00018   0.00036   0.00000  -0.00015
 231       11D-2        0.00000   0.00000   0.00000   0.00000   0.00000
 232       12F 0        0.00000   0.00000  -0.00010   0.00000  -0.00007
 233       12F+1        0.00000   0.00000   0.00000   0.00027   0.00000
 234       12F-1        0.00016   0.00000   0.00000   0.00000   0.00000
 235       12F+2        0.00000   0.00017  -0.00003   0.00000   0.00005
 236       12F-2        0.00000   0.00000   0.00000   0.00000   0.00000
 237       12F+3        0.00000   0.00000   0.00000   0.00063   0.00000
 238       12F-3       -0.00012   0.00000   0.00000   0.00000   0.00000
 239 12  F  1S          0.00000   0.00000  -0.00036  -0.00108  -0.00083
 240        2S          0.00000  -0.00002   0.00043   0.00253   0.00177
 241        3S          0.00000  -0.00000   0.00012   0.00060   0.00040
 242        4S          0.00000   0.00008   0.00154   0.00025   0.00136
 243        5PX         0.00000   0.00001  -0.00033  -0.00108  -0.00099
 244        5PY        -0.00001   0.00000   0.00000   0.00000   0.00000
 245        5PZ         0.00000   0.00001  -0.00026  -0.00102  -0.00044
 246        6PX         0.00000  -0.00003  -0.00054  -0.00139  -0.00156
 247        6PY         0.00002   0.00000   0.00000   0.00000   0.00000
 248        6PZ         0.00000   0.00001  -0.00041  -0.00141  -0.00073
 249        7PX         0.00000   0.00015  -0.00064  -0.00004  -0.00074
 250        7PY        -0.00002   0.00000   0.00000   0.00000   0.00000
 251        7PZ         0.00000  -0.00005  -0.00049  -0.00020  -0.00027
 252        8D 0        0.00000  -0.00000   0.00001   0.00004  -0.00005
 253        8D+1        0.00000   0.00000   0.00004   0.00020   0.00010
 254        8D-1       -0.00001   0.00000   0.00000   0.00000   0.00000
 255        8D+2        0.00000   0.00000   0.00002   0.00012   0.00011
 256        8D-2        0.00000   0.00000   0.00000   0.00000   0.00000
 257        9D 0        0.00000   0.00001  -0.00001   0.00018  -0.00010
 258        9D+1        0.00000  -0.00002   0.00023   0.00038   0.00039
 259        9D-1        0.00002   0.00000   0.00000   0.00000   0.00000
 260        9D+2        0.00000  -0.00001   0.00020   0.00009   0.00036
 261        9D-2       -0.00000   0.00000   0.00000   0.00000   0.00000
 262       10F 0        0.00000  -0.00000   0.00006   0.00001   0.00005
 263       10F+1        0.00000   0.00000  -0.00005  -0.00008  -0.00000
 264       10F-1       -0.00000   0.00000   0.00000   0.00000   0.00000
 265       10F+2        0.00000  -0.00000  -0.00011  -0.00005  -0.00006
 266       10F-2        0.00000   0.00000   0.00000   0.00000   0.00000
 267       10F+3        0.00000  -0.00000  -0.00006  -0.00001  -0.00004
 268       10F-3        0.00000   0.00000   0.00000   0.00000   0.00000
 269 13  F  1S          0.00000   0.00000  -0.00036   0.00108  -0.00083
 270        2S          0.00000  -0.00002   0.00043  -0.00253   0.00177
 271        3S          0.00000  -0.00000   0.00012  -0.00060   0.00040
 272        4S          0.00000   0.00008   0.00154  -0.00025   0.00136
 273        5PX         0.00000  -0.00001   0.00033  -0.00108   0.00099
 274        5PY        -0.00001   0.00000   0.00000   0.00000   0.00000
 275        5PZ         0.00000   0.00001  -0.00026   0.00102  -0.00044
 276        6PX         0.00000   0.00003   0.00054  -0.00139   0.00156
 277        6PY         0.00002   0.00000   0.00000   0.00000   0.00000
 278        6PZ         0.00000   0.00001  -0.00041   0.00141  -0.00073
 279        7PX         0.00000  -0.00015   0.00064  -0.00004   0.00074
 280        7PY        -0.00002   0.00000   0.00000   0.00000   0.00000
 281        7PZ         0.00000  -0.00005  -0.00049   0.00020  -0.00027
 282        8D 0        0.00000  -0.00000   0.00001  -0.00004  -0.00005
 283        8D+1        0.00000  -0.00000  -0.00004   0.00020  -0.00010
 284        8D-1       -0.00001   0.00000   0.00000   0.00000   0.00000
 285        8D+2        0.00000   0.00000   0.00002  -0.00012   0.00011
 286        8D-2       -0.00000   0.00000   0.00000   0.00000   0.00000
 287        9D 0        0.00000   0.00001  -0.00001  -0.00018  -0.00010
 288        9D+1        0.00000   0.00002  -0.00023   0.00038  -0.00039
 289        9D-1        0.00002   0.00000   0.00000   0.00000   0.00000
 290        9D+2        0.00000  -0.00001   0.00020  -0.00009   0.00036
 291        9D-2        0.00000   0.00000   0.00000   0.00000   0.00000
 292       10F 0        0.00000  -0.00000   0.00006  -0.00001   0.00005
 293       10F+1        0.00000  -0.00000   0.00005  -0.00008   0.00000
 294       10F-1       -0.00000   0.00000   0.00000   0.00000   0.00000
 295       10F+2        0.00000  -0.00000  -0.00011   0.00005  -0.00006
 296       10F-2       -0.00000   0.00000   0.00000   0.00000   0.00000
 297       10F+3        0.00000   0.00000   0.00006  -0.00001   0.00004
 298       10F-3        0.00000   0.00000   0.00000   0.00000   0.00000
                          11        12        13        14        15
                        (B2)--O   (A1)--O   (B1)--O   (A1)--O   (B2)--O
     Eigenvalues --    -4.28505  -1.60090  -1.58158  -1.10783  -0.97723
   1 1   C  1S         -0.00036  -0.00202   0.00000  -0.07510  -0.11797
   2        2S          0.00105   0.00428   0.00000   0.17972   0.28685
   3        3S         -0.00022  -0.00007   0.00000   0.03543   0.05685
   4        4S          0.00037   0.02225   0.00000   0.04001   0.10049
   5        5PX         0.00000   0.00000   0.00027   0.00000   0.00000
   6        5PY        -0.00018  -0.00110   0.00000  -0.02035   0.00449
   7        5PZ         0.00020   0.00076   0.00000  -0.02196  -0.01837
   8        6PX         0.00000   0.00000   0.00187   0.00000   0.00000
   9        6PY        -0.00174   0.00283   0.00000  -0.02373   0.00572
  10        6PZ         0.00184   0.00388   0.00000  -0.02531  -0.02626
  11        7PX         0.00000   0.00000   0.00152   0.00000   0.00000
  12        7PY        -0.00069  -0.00770   0.00000   0.00496   0.01512
  13        7PZ         0.00103   0.00545   0.00000  -0.00325  -0.00843
  14        8D 0        0.00009  -0.00026   0.00000   0.00103   0.00041
  15        8D+1        0.00000   0.00000  -0.00024   0.00000   0.00000
  16        8D-1       -0.00028   0.00005   0.00000   0.00346   0.00302
  17        8D+2       -0.00011   0.00011   0.00000  -0.00182   0.00034
  18        8D-2        0.00000   0.00000  -0.00008   0.00000   0.00000
  19        9D 0        0.00042  -0.00020   0.00000  -0.00119   0.00013
  20        9D+1        0.00000   0.00000   0.00411   0.00000   0.00000
  21        9D-1       -0.00121  -0.00215   0.00000   0.00302   0.00693
  22        9D+2       -0.00062   0.00148   0.00000  -0.00163   0.00177
  23        9D-2        0.00000   0.00000  -0.00032   0.00000   0.00000
  24       10F 0       -0.00006  -0.00007   0.00000  -0.00095  -0.00224
  25       10F+1        0.00000   0.00000   0.00077   0.00000   0.00000
  26       10F-1       -0.00021  -0.00095   0.00000  -0.00262  -0.00482
  27       10F+2       -0.00023  -0.00027   0.00000   0.00033   0.00077
  28       10F-2        0.00000   0.00000  -0.00091   0.00000   0.00000
  29       10F+3        0.00000   0.00000  -0.00026   0.00000   0.00000
  30       10F-3        0.00009   0.00004   0.00000   0.00285   0.00320
  31 2   H  1S          0.00002   0.00082   0.00023   0.02396   0.05394
  32        2S          0.00048  -0.00513   0.00002   0.02543   0.06157
  33        3S          0.00015   0.00179   0.00053  -0.00017   0.00297
  34        4PX         0.00002   0.00018  -0.00012  -0.00163  -0.00424
  35        4PY        -0.00001  -0.00014   0.00005  -0.00142  -0.00302
  36        4PZ         0.00002   0.00010  -0.00001  -0.00054  -0.00091
  37        5PX        -0.00016   0.00120   0.00037  -0.00006  -0.00170
  38        5PY        -0.00009   0.00210  -0.00067  -0.00165  -0.00254
  39        5PZ        -0.00006   0.00030  -0.00070  -0.00045  -0.00124
  40        6D 0       -0.00002   0.00024  -0.00010   0.00002  -0.00015
  41        6D+1        0.00000  -0.00007  -0.00001   0.00015   0.00045
  42        6D-1        0.00005  -0.00003   0.00015   0.00027   0.00022
  43        6D+2        0.00002  -0.00003  -0.00013  -0.00012   0.00005
  44        6D-2       -0.00000  -0.00022  -0.00003   0.00026   0.00080
  45 3   H  1S          0.00002   0.00082  -0.00023   0.02396   0.05394
  46        2S          0.00048  -0.00513  -0.00002   0.02543   0.06157
  47        3S          0.00015   0.00179  -0.00053  -0.00017   0.00297
  48        4PX        -0.00002  -0.00018  -0.00012   0.00163   0.00424
  49        4PY        -0.00001  -0.00014  -0.00005  -0.00142  -0.00302
  50        4PZ         0.00002   0.00010   0.00001  -0.00054  -0.00091
  51        5PX         0.00016  -0.00120   0.00037   0.00006   0.00170
  52        5PY        -0.00009   0.00210   0.00067  -0.00165  -0.00254
  53        5PZ        -0.00006   0.00030   0.00070  -0.00045  -0.00124
  54        6D 0       -0.00002   0.00024   0.00010   0.00002  -0.00015
  55        6D+1       -0.00000   0.00007  -0.00001  -0.00015  -0.00045
  56        6D-1        0.00005  -0.00003  -0.00015   0.00027   0.00022
  57        6D+2        0.00002  -0.00003   0.00013  -0.00012   0.00005
  58        6D-2        0.00000   0.00022  -0.00003  -0.00026  -0.00080
  59 4   H  1S         -0.00002   0.00082  -0.00023   0.02396  -0.05394
  60        2S         -0.00048  -0.00513  -0.00002   0.02543  -0.06157
  61        3S         -0.00015   0.00179  -0.00053  -0.00017  -0.00297
  62        4PX         0.00002  -0.00018  -0.00012   0.00163  -0.00424
  63        4PY        -0.00001   0.00014   0.00005   0.00142  -0.00302
  64        4PZ        -0.00002   0.00010   0.00001  -0.00054   0.00091
  65        5PX        -0.00016  -0.00120   0.00037   0.00006  -0.00170
  66        5PY        -0.00009  -0.00210  -0.00067   0.00165  -0.00254
  67        5PZ         0.00006   0.00030   0.00070  -0.00045   0.00124
  68        6D 0        0.00002   0.00024   0.00010   0.00002   0.00015
  69        6D+1        0.00000   0.00007  -0.00001  -0.00015   0.00045
  70        6D-1        0.00005   0.00003   0.00015  -0.00027   0.00022
  71        6D+2       -0.00002  -0.00003   0.00013  -0.00012  -0.00005
  72        6D-2        0.00000  -0.00022   0.00003   0.00026  -0.00080
  73 5   H  1S         -0.00002   0.00082   0.00023   0.02396  -0.05394
  74        2S         -0.00048  -0.00513   0.00002   0.02543  -0.06157
  75        3S         -0.00015   0.00179   0.00053  -0.00017  -0.00297
  76        4PX        -0.00002   0.00018  -0.00012  -0.00163   0.00424
  77        4PY        -0.00001   0.00014  -0.00005   0.00142  -0.00302
  78        4PZ        -0.00002   0.00010  -0.00001  -0.00054   0.00091
  79        5PX         0.00016   0.00120   0.00037  -0.00006   0.00170
  80        5PY        -0.00009  -0.00210   0.00067   0.00165  -0.00254
  81        5PZ         0.00006   0.00030  -0.00070  -0.00045   0.00124
  82        6D 0        0.00002   0.00024  -0.00010   0.00002   0.00015
  83        6D+1       -0.00000  -0.00007  -0.00001   0.00015  -0.00045
  84        6D-1        0.00005   0.00003  -0.00015  -0.00027   0.00022
  85        6D+2       -0.00002  -0.00003  -0.00013  -0.00012  -0.00005
  86        6D-2       -0.00000   0.00022   0.00003  -0.00026   0.00080
  87 6   C  1S          0.00036  -0.00202   0.00000  -0.07510   0.11797
  88        2S         -0.00105   0.00428   0.00000   0.17972  -0.28685
  89        3S          0.00022  -0.00007   0.00000   0.03543  -0.05685
  90        4S         -0.00037   0.02225   0.00000   0.04001  -0.10049
  91        5PX         0.00000   0.00000   0.00027   0.00000   0.00000
  92        5PY        -0.00018   0.00110   0.00000   0.02035   0.00449
  93        5PZ        -0.00020   0.00076   0.00000  -0.02196   0.01837
  94        6PX         0.00000   0.00000   0.00187   0.00000   0.00000
  95        6PY        -0.00174  -0.00283   0.00000   0.02373   0.00572
  96        6PZ        -0.00184   0.00388   0.00000  -0.02531   0.02626
  97        7PX         0.00000   0.00000   0.00152   0.00000   0.00000
  98        7PY        -0.00069   0.00770   0.00000  -0.00496   0.01512
  99        7PZ        -0.00103   0.00545   0.00000  -0.00325   0.00843
 100        8D 0       -0.00009  -0.00026   0.00000   0.00103  -0.00041
 101        8D+1        0.00000   0.00000  -0.00024   0.00000   0.00000
 102        8D-1       -0.00028  -0.00005   0.00000  -0.00346   0.00302
 103        8D+2        0.00011   0.00011   0.00000  -0.00182  -0.00034
 104        8D-2        0.00000   0.00000   0.00008   0.00000   0.00000
 105        9D 0       -0.00042  -0.00020   0.00000  -0.00119  -0.00013
 106        9D+1        0.00000   0.00000   0.00411   0.00000   0.00000
 107        9D-1       -0.00121   0.00215   0.00000  -0.00302   0.00693
 108        9D+2        0.00062   0.00148   0.00000  -0.00163  -0.00177
 109        9D-2        0.00000   0.00000   0.00032   0.00000   0.00000
 110       10F 0        0.00006  -0.00007   0.00000  -0.00095   0.00224
 111       10F+1        0.00000   0.00000   0.00077   0.00000   0.00000
 112       10F-1       -0.00021   0.00095   0.00000   0.00262  -0.00482
 113       10F+2        0.00023  -0.00027   0.00000   0.00033  -0.00077
 114       10F-2        0.00000   0.00000   0.00091   0.00000   0.00000
 115       10F+3        0.00000   0.00000  -0.00026   0.00000   0.00000
 116       10F-3        0.00009  -0.00004   0.00000  -0.00285   0.00320
 117 7   C  1S          0.00002  -0.00053   0.00000  -0.12029   0.05899
 118        2S          0.00011   0.00042   0.00000   0.28266  -0.14650
 119        3S          0.00000   0.00047   0.00000   0.05749  -0.03014
 120        4S         -0.00078  -0.00306   0.00000   0.09832  -0.08644
 121        5PX         0.00000   0.00000  -0.00007   0.00000   0.00000
 122        5PY        -0.00002   0.00005   0.00000   0.04029   0.04524
 123        5PZ        -0.00000   0.00047   0.00000   0.02115  -0.02773
 124        6PX         0.00000   0.00000   0.00119   0.00000   0.00000
 125        6PY         0.00032  -0.00007   0.00000   0.03144   0.04994
 126        6PZ        -0.00000   0.00038   0.00000   0.01955  -0.03275
 127        7PX         0.00000   0.00000   0.00100   0.00000   0.00000
 128        7PY         0.00007   0.00062   0.00000   0.00393  -0.00183
 129        7PZ        -0.00075   0.00069   0.00000   0.00349  -0.00910
 130        8D 0       -0.00000   0.00020   0.00000   0.00142  -0.00544
 131        8D+1        0.00000   0.00000   0.00004   0.00000   0.00000
 132        8D-1       -0.00003   0.00027   0.00000  -0.00039   0.00433
 133        8D+2       -0.00000   0.00003   0.00000  -0.01055   0.00253
 134        8D-2        0.00000   0.00000   0.00006   0.00000   0.00000
 135        9D 0       -0.00024  -0.00007   0.00000   0.00554  -0.00628
 136        9D+1        0.00000   0.00000   0.00102   0.00000   0.00000
 137        9D-1        0.00042  -0.00126   0.00000   0.00418  -0.00000
 138        9D+2       -0.00017  -0.00015   0.00000  -0.00958   0.00644
 139        9D-2        0.00000   0.00000  -0.00062   0.00000   0.00000
 140       10F 0        0.00001   0.00013   0.00000   0.00018  -0.00059
 141       10F+1        0.00000   0.00000   0.00011   0.00000   0.00000
 142       10F-1        0.00002  -0.00024   0.00000  -0.00677   0.00381
 143       10F+2       -0.00002  -0.00011   0.00000  -0.00044   0.00032
 144       10F-2        0.00000   0.00000  -0.00024   0.00000   0.00000
 145       10F+3        0.00000   0.00000   0.00001   0.00000   0.00000
 146       10F-3        0.00001  -0.00004   0.00000  -0.00215   0.00036
 147 8   H  1S         -0.00001   0.00003   0.00000   0.03382  -0.02679
 148        2S         -0.00009   0.00133   0.00000   0.01675  -0.02584
 149        3S         -0.00027   0.00172   0.00000  -0.00049  -0.00389
 150        4PX         0.00000   0.00000   0.00010   0.00000   0.00000
 151        4PY         0.00001  -0.00001   0.00000   0.00169  -0.00060
 152        4PZ         0.00001  -0.00008   0.00000   0.00210  -0.00261
 153        5PX         0.00000   0.00000  -0.00028   0.00000   0.00000
 154        5PY         0.00015  -0.00008   0.00000  -0.00363   0.00003
 155        5PZ        -0.00004   0.00041   0.00000  -0.00539  -0.00046
 156        6D 0       -0.00000  -0.00006   0.00000  -0.00034  -0.00052
 157        6D+1        0.00000   0.00000  -0.00001   0.00000   0.00000
 158        6D-1        0.00002  -0.00009   0.00000  -0.00067  -0.00010
 159        6D+2       -0.00002   0.00006   0.00000  -0.00025   0.00022
 160        6D-2        0.00000   0.00000   0.00004   0.00000   0.00000
 161 9   C  1S         -0.00002  -0.00053   0.00000  -0.12029  -0.05899
 162        2S         -0.00011   0.00042   0.00000   0.28266   0.14650
 163        3S         -0.00000   0.00047   0.00000   0.05749   0.03014
 164        4S          0.00078  -0.00306   0.00000   0.09832   0.08644
 165        5PX         0.00000   0.00000  -0.00007   0.00000   0.00000
 166        5PY        -0.00002  -0.00005   0.00000  -0.04029   0.04524
 167        5PZ         0.00000   0.00047   0.00000   0.02115   0.02773
 168        6PX         0.00000   0.00000   0.00119   0.00000   0.00000
 169        6PY         0.00032   0.00007   0.00000  -0.03144   0.04994
 170        6PZ         0.00000   0.00038   0.00000   0.01955   0.03275
 171        7PX         0.00000   0.00000   0.00100   0.00000   0.00000
 172        7PY         0.00007  -0.00062   0.00000  -0.00393  -0.00183
 173        7PZ         0.00075   0.00069   0.00000   0.00349   0.00910
 174        8D 0        0.00000   0.00020   0.00000   0.00142   0.00544
 175        8D+1        0.00000   0.00000   0.00004   0.00000   0.00000
 176        8D-1       -0.00003  -0.00027   0.00000   0.00039   0.00433
 177        8D+2        0.00000   0.00003   0.00000  -0.01055  -0.00253
 178        8D-2        0.00000   0.00000  -0.00006   0.00000   0.00000
 179        9D 0        0.00024  -0.00007   0.00000   0.00554   0.00628
 180        9D+1        0.00000   0.00000   0.00102   0.00000   0.00000
 181        9D-1        0.00042   0.00126   0.00000  -0.00418  -0.00000
 182        9D+2        0.00017  -0.00015   0.00000  -0.00958  -0.00644
 183        9D-2        0.00000   0.00000   0.00062   0.00000   0.00000
 184       10F 0       -0.00001   0.00013   0.00000   0.00018   0.00059
 185       10F+1        0.00000   0.00000   0.00011   0.00000   0.00000
 186       10F-1        0.00002   0.00024   0.00000   0.00677   0.00381
 187       10F+2        0.00002  -0.00011   0.00000  -0.00044  -0.00032
 188       10F-2        0.00000   0.00000   0.00024   0.00000   0.00000
 189       10F+3        0.00000   0.00000   0.00001   0.00000   0.00000
 190       10F-3        0.00001   0.00004   0.00000   0.00215   0.00036
 191 10  H  1S          0.00001   0.00003   0.00000   0.03382   0.02679
 192        2S          0.00009   0.00133   0.00000   0.01675   0.02584
 193        3S          0.00027   0.00172   0.00000  -0.00049   0.00389
 194        4PX         0.00000   0.00000   0.00010   0.00000   0.00000
 195        4PY         0.00001   0.00001   0.00000  -0.00169  -0.00060
 196        4PZ        -0.00001  -0.00008   0.00000   0.00210   0.00261
 197        5PX         0.00000   0.00000  -0.00028   0.00000   0.00000
 198        5PY         0.00015   0.00008   0.00000   0.00363   0.00003
 199        5PZ         0.00004   0.00041   0.00000  -0.00539   0.00046
 200        6D 0        0.00000  -0.00006   0.00000  -0.00034   0.00052
 201        6D+1        0.00000   0.00000  -0.00001   0.00000   0.00000
 202        6D-1        0.00002   0.00009   0.00000   0.00067  -0.00010
 203        6D+2        0.00002   0.00006   0.00000  -0.00025  -0.00022
 204        6D-2        0.00000   0.00000  -0.00004   0.00000   0.00000
 205 11  Si 1S          0.00000   0.01610   0.00000   0.01133   0.00000
 206        2S          0.00000  -0.06718   0.00000  -0.04394   0.00000
 207        3S          0.00000   0.09639   0.00000   0.08717   0.00000
 208        4S          0.00000   0.01356   0.00000   0.01060   0.00000
 209        5S          0.00000  -0.01736   0.00000   0.02006   0.00000
 210        6PX         0.00000   0.00000  -0.05838   0.00000   0.00000
 211        6PY         0.92137   0.00000   0.00000   0.00000  -0.04087
 212        6PZ         0.00000  -0.04313   0.00000   0.02777   0.00000
 213        7PX         0.00000   0.00000   0.07964   0.00000   0.00000
 214        7PY         0.00048   0.00000   0.00000   0.00000   0.08929
 215        7PZ         0.00000   0.05949   0.00000  -0.05270   0.00000
 216        8PX         0.00000   0.00000   0.00940   0.00000   0.00000
 217        8PY         0.13190   0.00000   0.00000   0.00000   0.00911
 218        8PZ         0.00000   0.00726   0.00000  -0.00551   0.00000
 219        9PX         0.00000   0.00000   0.00125   0.00000   0.00000
 220        9PY        -0.00078   0.00000   0.00000   0.00000   0.02096
 221        9PZ         0.00000   0.01180   0.00000  -0.01128   0.00000
 222       10D 0        0.00000   0.00185   0.00000   0.00298   0.00000
 223       10D+1        0.00000   0.00000   0.02408   0.00000   0.00000
 224       10D-1        0.00052   0.00000   0.00000   0.00000  -0.02478
 225       10D+2        0.00000   0.01448   0.00000  -0.00891   0.00000
 226       10D-2        0.00000   0.00000   0.00000   0.00000   0.00000
 227       11D 0        0.00000   0.00283   0.00000   0.00671   0.00000
 228       11D+1        0.00000   0.00000   0.04407   0.00000   0.00000
 229       11D-1        0.00188   0.00000   0.00000   0.00000  -0.02763
 230       11D+2        0.00000   0.02705   0.00000  -0.00960   0.00000
 231       11D-2        0.00000   0.00000   0.00000   0.00000   0.00000
 232       12F 0        0.00000  -0.01088   0.00000   0.00068   0.00000
 233       12F+1        0.00000   0.00000   0.01305   0.00000   0.00000
 234       12F-1       -0.00027   0.00000   0.00000   0.00000   0.00648
 235       12F+2        0.00000   0.01927   0.00000   0.00506   0.00000
 236       12F-2        0.00000   0.00000   0.00000   0.00000   0.00000
 237       12F+3        0.00000   0.00000   0.01270   0.00000   0.00000
 238       12F-3        0.00047   0.00000   0.00000   0.00000  -0.00313
 239 12  F  1S          0.00000  -0.15183  -0.15494   0.00638   0.00000
 240        2S          0.00000   0.37232   0.38154  -0.01650   0.00000
 241        3S          0.00000   0.10859   0.11172  -0.00511   0.00000
 242        4S          0.00000   0.22837   0.23048  -0.01328   0.00000
 243        5PX         0.00000  -0.01761  -0.01363  -0.00395   0.00000
 244        5PY         0.00030   0.00000   0.00000   0.00000   0.00920
 245        5PZ         0.00000  -0.01217  -0.01208  -0.00651   0.00000
 246        6PX         0.00000  -0.02869  -0.02137  -0.00474   0.00000
 247        6PY         0.00047   0.00000   0.00000   0.00000   0.01161
 248        6PZ         0.00000  -0.01913  -0.01906  -0.00818   0.00000
 249        7PX         0.00000  -0.00486  -0.00041  -0.00251   0.00000
 250        7PY         0.00003   0.00000   0.00000   0.00000   0.00687
 251        7PZ         0.00000  -0.00260  -0.00438  -0.00390   0.00000
 252        8D 0        0.00000   0.00011  -0.00005   0.00005   0.00000
 253        8D+1        0.00000   0.00075   0.00077   0.00013   0.00000
 254        8D-1       -0.00005   0.00000   0.00000   0.00000  -0.00015
 255        8D+2        0.00000   0.00045   0.00057   0.00003   0.00000
 256        8D-2       -0.00006   0.00000   0.00000   0.00000  -0.00012
 257        9D 0        0.00000  -0.00056   0.00127   0.00044   0.00000
 258        9D+1        0.00000   0.00551   0.00488   0.00063   0.00000
 259        9D-1       -0.00007   0.00000   0.00000   0.00000  -0.00079
 260        9D+2        0.00000   0.00460   0.00209   0.00021   0.00000
 261        9D-2       -0.00015   0.00000   0.00000   0.00000  -0.00080
 262       10F 0        0.00000   0.00054   0.00036  -0.00002   0.00000
 263       10F+1        0.00000  -0.00038  -0.00066  -0.00013   0.00000
 264       10F-1        0.00001   0.00000   0.00000   0.00000   0.00010
 265       10F+2        0.00000  -0.00115  -0.00085  -0.00005   0.00000
 266       10F-2        0.00004   0.00000   0.00000   0.00000   0.00021
 267       10F+3        0.00000  -0.00068  -0.00034   0.00002   0.00000
 268       10F-3        0.00003   0.00000   0.00000   0.00000   0.00012
 269 13  F  1S          0.00000  -0.15183   0.15494   0.00638   0.00000
 270        2S          0.00000   0.37232  -0.38154  -0.01650   0.00000
 271        3S          0.00000   0.10859  -0.11172  -0.00511   0.00000
 272        4S          0.00000   0.22837  -0.23048  -0.01328   0.00000
 273        5PX         0.00000   0.01761  -0.01363   0.00395   0.00000
 274        5PY         0.00030   0.00000   0.00000   0.00000   0.00920
 275        5PZ         0.00000  -0.01217   0.01208  -0.00651   0.00000
 276        6PX         0.00000   0.02869  -0.02137   0.00474   0.00000
 277        6PY         0.00047   0.00000   0.00000   0.00000   0.01161
 278        6PZ         0.00000  -0.01913   0.01906  -0.00818   0.00000
 279        7PX         0.00000   0.00486  -0.00041   0.00251   0.00000
 280        7PY         0.00003   0.00000   0.00000   0.00000   0.00687
 281        7PZ         0.00000  -0.00260   0.00438  -0.00390   0.00000
 282        8D 0        0.00000   0.00011   0.00005   0.00005   0.00000
 283        8D+1        0.00000  -0.00075   0.00077  -0.00013   0.00000
 284        8D-1       -0.00005   0.00000   0.00000   0.00000  -0.00015
 285        8D+2        0.00000   0.00045  -0.00057   0.00003   0.00000
 286        8D-2        0.00006   0.00000   0.00000   0.00000   0.00012
 287        9D 0        0.00000  -0.00056  -0.00127   0.00044   0.00000
 288        9D+1        0.00000  -0.00551   0.00488  -0.00063   0.00000
 289        9D-1       -0.00007   0.00000   0.00000   0.00000  -0.00079
 290        9D+2        0.00000   0.00460  -0.00209   0.00021   0.00000
 291        9D-2        0.00015   0.00000   0.00000   0.00000   0.00080
 292       10F 0        0.00000   0.00054  -0.00036  -0.00002   0.00000
 293       10F+1        0.00000   0.00038  -0.00066   0.00013   0.00000
 294       10F-1        0.00001   0.00000   0.00000   0.00000   0.00010
 295       10F+2        0.00000  -0.00115   0.00085  -0.00005   0.00000
 296       10F-2       -0.00004   0.00000   0.00000   0.00000  -0.00021
 297       10F+3        0.00000   0.00068  -0.00034  -0.00002   0.00000
 298       10F-3        0.00003   0.00000   0.00000   0.00000   0.00012
                          16        17        18        19        20
                        (A1)--O   (A1)--O   (B2)--O   (B1)--O   (A1)--O
     Eigenvalues --    -0.90844  -0.77425  -0.73515  -0.71216  -0.69445
   1 1   C  1S         -0.09047   0.02988  -0.03852   0.00000   0.01442
   2        2S          0.22145  -0.07329   0.09609   0.00000  -0.03491
   3        3S          0.04265  -0.01663   0.01970   0.00000  -0.00804
   4        4S          0.11950   0.00824   0.04580   0.00000  -0.06745
   5        5PX         0.00000   0.00000   0.00000  -0.02179   0.00000
   6        5PY         0.01470  -0.03390   0.03396   0.00000  -0.07226
   7        5PZ         0.02423   0.02101   0.07071   0.00000   0.01218
   8        6PX         0.00000   0.00000   0.00000  -0.03470   0.00000
   9        6PY         0.01499  -0.03393   0.03727   0.00000  -0.10005
  10        6PZ         0.02869   0.03422   0.08890   0.00000   0.01892
  11        7PX         0.00000   0.00000   0.00000  -0.04194   0.00000
  12        7PY         0.00335  -0.02826   0.02045   0.00000  -0.02551
  13        7PZ         0.00500   0.03264   0.02408   0.00000   0.00823
  14        8D 0       -0.00281   0.00075  -0.00682   0.00000   0.00146
  15        8D+1        0.00000   0.00000   0.00000  -0.00036   0.00000
  16        8D-1       -0.00141  -0.00220  -0.00400   0.00000  -0.00051
  17        8D+2        0.00068  -0.00138   0.00119   0.00000  -0.00393
  18        8D-2        0.00000   0.00000   0.00000  -0.00088   0.00000
  19        9D 0       -0.00303  -0.00232  -0.00204   0.00000   0.00303
  20        9D+1        0.00000   0.00000   0.00000  -0.00501   0.00000
  21        9D-1       -0.00142  -0.00838  -0.00565   0.00000  -0.00287
  22        9D+2       -0.00182  -0.00108   0.00056   0.00000  -0.01116
  23        9D-2        0.00000   0.00000   0.00000  -0.00398   0.00000
  24       10F 0       -0.00185   0.00060   0.00069   0.00000   0.00103
  25       10F+1        0.00000   0.00000   0.00000  -0.00084   0.00000
  26       10F-1       -0.00417  -0.00001  -0.00148   0.00000   0.00015
  27       10F+2       -0.00021  -0.00104  -0.00084   0.00000  -0.00024
  28       10F-2        0.00000   0.00000   0.00000   0.00160   0.00000
  29       10F+3        0.00000   0.00000   0.00000   0.00138   0.00000
  30       10F-3        0.00295   0.00001   0.00061   0.00000  -0.00012
  31 2   H  1S          0.04942  -0.02594   0.03857  -0.01219  -0.03487
  32        2S          0.05804  -0.04871   0.05877  -0.00604  -0.03767
  33        3S          0.00795  -0.00752   0.01284  -0.00002  -0.01346
  34        4PX        -0.00387   0.00262  -0.00337   0.00056   0.00313
  35        4PY        -0.00268   0.00097  -0.00175   0.00079   0.00110
  36        4PZ         0.00000   0.00104   0.00121   0.00031   0.00079
  37        5PX        -0.00131   0.00612  -0.00419  -0.00220   0.00117
  38        5PY        -0.00302   0.00462  -0.00395   0.00072  -0.00539
  39        5PZ         0.00047   0.00160   0.00366  -0.00189   0.00118
  40        6D 0       -0.00026   0.00064  -0.00076   0.00024   0.00009
  41        6D+1        0.00008  -0.00048  -0.00056   0.00018  -0.00034
  42        6D-1       -0.00014  -0.00035  -0.00074   0.00011  -0.00025
  43        6D+2       -0.00007  -0.00043   0.00014   0.00055  -0.00084
  44        6D-2        0.00073  -0.00085   0.00066   0.00001  -0.00009
  45 3   H  1S          0.04942  -0.02594   0.03857   0.01219  -0.03487
  46        2S          0.05804  -0.04871   0.05877   0.00604  -0.03767
  47        3S          0.00795  -0.00752   0.01284   0.00002  -0.01346
  48        4PX         0.00387  -0.00262   0.00337   0.00056  -0.00313
  49        4PY        -0.00268   0.00097  -0.00175  -0.00079   0.00110
  50        4PZ         0.00000   0.00104   0.00121  -0.00031   0.00079
  51        5PX         0.00131  -0.00612   0.00419  -0.00220  -0.00117
  52        5PY        -0.00302   0.00462  -0.00395  -0.00072  -0.00539
  53        5PZ         0.00047   0.00160   0.00366   0.00189   0.00118
  54        6D 0       -0.00026   0.00064  -0.00076  -0.00024   0.00009
  55        6D+1       -0.00008   0.00048   0.00056   0.00018   0.00034
  56        6D-1       -0.00014  -0.00035  -0.00074  -0.00011  -0.00025
  57        6D+2       -0.00007  -0.00043   0.00014  -0.00055  -0.00084
  58        6D-2       -0.00073   0.00085  -0.00066   0.00001   0.00009
  59 4   H  1S          0.04942  -0.02594  -0.03857   0.01219  -0.03487
  60        2S          0.05804  -0.04871  -0.05877   0.00604  -0.03767
  61        3S          0.00795  -0.00752  -0.01284   0.00002  -0.01346
  62        4PX         0.00387  -0.00262  -0.00337   0.00056  -0.00313
  63        4PY         0.00268  -0.00097  -0.00175   0.00079  -0.00110
  64        4PZ         0.00000   0.00104  -0.00121  -0.00031   0.00079
  65        5PX         0.00131  -0.00612  -0.00419  -0.00220  -0.00117
  66        5PY         0.00302  -0.00462  -0.00395   0.00072   0.00539
  67        5PZ         0.00047   0.00160  -0.00366   0.00189   0.00118
  68        6D 0       -0.00026   0.00064   0.00076  -0.00024   0.00009
  69        6D+1       -0.00008   0.00048  -0.00056   0.00018   0.00034
  70        6D-1        0.00014   0.00035  -0.00074   0.00011   0.00025
  71        6D+2       -0.00007  -0.00043  -0.00014  -0.00055  -0.00084
  72        6D-2        0.00073  -0.00085  -0.00066  -0.00001  -0.00009
  73 5   H  1S          0.04942  -0.02594  -0.03857  -0.01219  -0.03487
  74        2S          0.05804  -0.04871  -0.05877  -0.00604  -0.03767
  75        3S          0.00795  -0.00752  -0.01284  -0.00002  -0.01346
  76        4PX        -0.00387   0.00262   0.00337   0.00056   0.00313
  77        4PY         0.00268  -0.00097  -0.00175  -0.00079  -0.00110
  78        4PZ         0.00000   0.00104  -0.00121   0.00031   0.00079
  79        5PX        -0.00131   0.00612   0.00419  -0.00220   0.00117
  80        5PY         0.00302  -0.00462  -0.00395  -0.00072   0.00539
  81        5PZ         0.00047   0.00160  -0.00366  -0.00189   0.00118
  82        6D 0       -0.00026   0.00064   0.00076   0.00024   0.00009
  83        6D+1        0.00008  -0.00048   0.00056   0.00018  -0.00034
  84        6D-1        0.00014   0.00035  -0.00074  -0.00011   0.00025
  85        6D+2       -0.00007  -0.00043  -0.00014   0.00055  -0.00084
  86        6D-2       -0.00073   0.00085   0.00066  -0.00001   0.00009
  87 6   C  1S         -0.09047   0.02988   0.03852   0.00000   0.01442
  88        2S          0.22145  -0.07329  -0.09609   0.00000  -0.03491
  89        3S          0.04265  -0.01663  -0.01970   0.00000  -0.00804
  90        4S          0.11950   0.00824  -0.04580   0.00000  -0.06745
  91        5PX         0.00000   0.00000   0.00000  -0.02179   0.00000
  92        5PY        -0.01470   0.03390   0.03396   0.00000   0.07226
  93        5PZ         0.02423   0.02101  -0.07071   0.00000   0.01218
  94        6PX         0.00000   0.00000   0.00000  -0.03470   0.00000
  95        6PY        -0.01499   0.03393   0.03727   0.00000   0.10005
  96        6PZ         0.02869   0.03422  -0.08890   0.00000   0.01892
  97        7PX         0.00000   0.00000   0.00000  -0.04194   0.00000
  98        7PY        -0.00335   0.02826   0.02045   0.00000   0.02551
  99        7PZ         0.00500   0.03264  -0.02408   0.00000   0.00823
 100        8D 0       -0.00281   0.00075   0.00682   0.00000   0.00146
 101        8D+1        0.00000   0.00000   0.00000  -0.00036   0.00000
 102        8D-1        0.00141   0.00220  -0.00400   0.00000   0.00051
 103        8D+2        0.00068  -0.00138  -0.00119   0.00000  -0.00393
 104        8D-2        0.00000   0.00000   0.00000   0.00088   0.00000
 105        9D 0       -0.00303  -0.00232   0.00204   0.00000   0.00303
 106        9D+1        0.00000   0.00000   0.00000  -0.00501   0.00000
 107        9D-1        0.00142   0.00838  -0.00565   0.00000   0.00287
 108        9D+2       -0.00182  -0.00108  -0.00056   0.00000  -0.01116
 109        9D-2        0.00000   0.00000   0.00000   0.00398   0.00000
 110       10F 0       -0.00185   0.00060  -0.00069   0.00000   0.00103
 111       10F+1        0.00000   0.00000   0.00000  -0.00084   0.00000
 112       10F-1        0.00417   0.00001  -0.00148   0.00000  -0.00015
 113       10F+2       -0.00021  -0.00104   0.00084   0.00000  -0.00024
 114       10F-2        0.00000   0.00000   0.00000  -0.00160   0.00000
 115       10F+3        0.00000   0.00000   0.00000   0.00138   0.00000
 116       10F-3       -0.00295  -0.00001   0.00061   0.00000   0.00012
 117 7   C  1S          0.07878  -0.00642  -0.08813   0.00000   0.00262
 118        2S         -0.19013   0.01439   0.22570   0.00000  -0.00577
 119        3S         -0.03878   0.00321   0.04681   0.00000  -0.00169
 120        4S         -0.09834   0.01208   0.14946   0.00000  -0.02686
 121        5PX         0.00000   0.00000   0.00000  -0.00736   0.00000
 122        5PY        -0.07157   0.03528  -0.07006   0.00000   0.06930
 123        5PZ         0.05306  -0.01139  -0.03770   0.00000   0.06525
 124        6PX         0.00000   0.00000   0.00000  -0.00965   0.00000
 125        6PY        -0.07063   0.03958  -0.08639   0.00000   0.08718
 126        6PZ         0.07139  -0.01443  -0.04209   0.00000   0.09354
 127        7PX         0.00000   0.00000   0.00000  -0.00183   0.00000
 128        7PY        -0.01138   0.00551  -0.02454   0.00000   0.02105
 129        7PZ         0.01154   0.00047  -0.02523   0.00000   0.02510
 130        8D 0        0.00434  -0.00143   0.00675   0.00000  -0.00223
 131        8D+1        0.00000   0.00000   0.00000  -0.00078   0.00000
 132        8D-1       -0.00306   0.00206   0.00490   0.00000   0.00047
 133        8D+2        0.00873  -0.00140  -0.00284   0.00000  -0.00192
 134        8D-2        0.00000   0.00000   0.00000   0.00008   0.00000
 135        9D 0        0.00014   0.00006   0.01033   0.00000  -0.00531
 136        9D+1        0.00000   0.00000   0.00000  -0.00161   0.00000
 137        9D-1       -0.00915   0.00067   0.00221   0.00000  -0.00524
 138        9D+2        0.00868  -0.00126  -0.00762   0.00000   0.00296
 139        9D-2        0.00000   0.00000   0.00000  -0.00153   0.00000
 140       10F 0       -0.00017   0.00076  -0.00084   0.00000   0.00058
 141       10F+1        0.00000   0.00000   0.00000  -0.00036   0.00000
 142       10F-1        0.00494  -0.00079  -0.00512   0.00000   0.00025
 143       10F+2       -0.00166   0.00038  -0.00072   0.00000  -0.00135
 144       10F-2        0.00000   0.00000   0.00000   0.00025   0.00000
 145       10F+3        0.00000   0.00000   0.00000   0.00021   0.00000
 146       10F-3        0.00219  -0.00086  -0.00030   0.00000  -0.00176
 147 8   H  1S         -0.04340  -0.00060   0.09409   0.00000  -0.05702
 148        2S         -0.03350  -0.00299   0.12530   0.00000  -0.06556
 149        3S         -0.00539   0.00349   0.02867   0.00000  -0.02196
 150        4PX         0.00000   0.00000   0.00000  -0.00021   0.00000
 151        4PY        -0.00331   0.00050   0.00349   0.00000  -0.00243
 152        4PZ        -0.00242  -0.00066   0.00787   0.00000  -0.00470
 153        5PX         0.00000   0.00000   0.00000  -0.00051   0.00000
 154        5PY         0.00057   0.00069   0.00127   0.00000   0.00230
 155        5PZ         0.00607  -0.00131   0.00804   0.00000   0.00210
 156        6D 0        0.00089  -0.00066   0.00179   0.00000  -0.00066
 157        6D+1        0.00000   0.00000   0.00000  -0.00013   0.00000
 158        6D-1       -0.00035   0.00001   0.00103   0.00000  -0.00068
 159        6D+2        0.00066  -0.00019  -0.00001   0.00000   0.00001
 160        6D-2        0.00000   0.00000   0.00000  -0.00009   0.00000
 161 9   C  1S          0.07878  -0.00642   0.08813   0.00000   0.00262
 162        2S         -0.19013   0.01439  -0.22570   0.00000  -0.00577
 163        3S         -0.03878   0.00321  -0.04681   0.00000  -0.00169
 164        4S         -0.09834   0.01208  -0.14946   0.00000  -0.02686
 165        5PX         0.00000   0.00000   0.00000  -0.00736   0.00000
 166        5PY         0.07157  -0.03528  -0.07006   0.00000  -0.06930
 167        5PZ         0.05306  -0.01139   0.03770   0.00000   0.06525
 168        6PX         0.00000   0.00000   0.00000  -0.00965   0.00000
 169        6PY         0.07063  -0.03958  -0.08639   0.00000  -0.08718
 170        6PZ         0.07139  -0.01443   0.04209   0.00000   0.09354
 171        7PX         0.00000   0.00000   0.00000  -0.00183   0.00000
 172        7PY         0.01138  -0.00551  -0.02454   0.00000  -0.02105
 173        7PZ         0.01154   0.00047   0.02523   0.00000   0.02510
 174        8D 0        0.00434  -0.00143  -0.00675   0.00000  -0.00223
 175        8D+1        0.00000   0.00000   0.00000  -0.00078   0.00000
 176        8D-1        0.00306  -0.00206   0.00490   0.00000  -0.00047
 177        8D+2        0.00873  -0.00140   0.00284   0.00000  -0.00192
 178        8D-2        0.00000   0.00000   0.00000  -0.00008   0.00000
 179        9D 0        0.00014   0.00006  -0.01033   0.00000  -0.00531
 180        9D+1        0.00000   0.00000   0.00000  -0.00161   0.00000
 181        9D-1        0.00915  -0.00067   0.00221   0.00000   0.00524
 182        9D+2        0.00868  -0.00126   0.00762   0.00000   0.00296
 183        9D-2        0.00000   0.00000   0.00000   0.00153   0.00000
 184       10F 0       -0.00017   0.00076   0.00084   0.00000   0.00058
 185       10F+1        0.00000   0.00000   0.00000  -0.00036   0.00000
 186       10F-1       -0.00494   0.00079  -0.00512   0.00000  -0.00025
 187       10F+2       -0.00166   0.00038   0.00072   0.00000  -0.00135
 188       10F-2        0.00000   0.00000   0.00000  -0.00025   0.00000
 189       10F+3        0.00000   0.00000   0.00000   0.00021   0.00000
 190       10F-3       -0.00219   0.00086  -0.00030   0.00000   0.00176
 191 10  H  1S         -0.04340  -0.00060  -0.09409   0.00000  -0.05702
 192        2S         -0.03350  -0.00299  -0.12530   0.00000  -0.06556
 193        3S         -0.00539   0.00349  -0.02867   0.00000  -0.02196
 194        4PX         0.00000   0.00000   0.00000  -0.00021   0.00000
 195        4PY         0.00331  -0.00050   0.00349   0.00000   0.00243
 196        4PZ        -0.00242  -0.00066  -0.00787   0.00000  -0.00470
 197        5PX         0.00000   0.00000   0.00000  -0.00051   0.00000
 198        5PY        -0.00057  -0.00069   0.00127   0.00000  -0.00230
 199        5PZ         0.00607  -0.00131  -0.00804   0.00000   0.00210
 200        6D 0        0.00089  -0.00066  -0.00179   0.00000  -0.00066
 201        6D+1        0.00000   0.00000   0.00000  -0.00013   0.00000
 202        6D-1        0.00035  -0.00001   0.00103   0.00000   0.00068
 203        6D+2        0.00066  -0.00019   0.00001   0.00000   0.00001
 204        6D-2        0.00000   0.00000   0.00000   0.00009   0.00000
 205 11  Si 1S          0.02144   0.03546   0.00000   0.00000   0.00945
 206        2S         -0.08390  -0.14241   0.00000   0.00000  -0.03716
 207        3S          0.17110   0.28392   0.00000   0.00000   0.07621
 208        4S          0.02260   0.04838   0.00000   0.00000   0.00356
 209        5S          0.01361  -0.06458   0.00000   0.00000   0.08286
 210        6PX         0.00000   0.00000   0.00000   0.11155   0.00000
 211        6PY         0.00000   0.00000  -0.05174   0.00000   0.00000
 212        6PZ         0.02427  -0.05672   0.00000   0.00000   0.06573
 213        7PX         0.00000   0.00000   0.00000  -0.22220   0.00000
 214        7PY         0.00000   0.00000   0.11191   0.00000   0.00000
 215        7PZ        -0.05118   0.11387   0.00000   0.00000  -0.12797
 216        8PX         0.00000   0.00000   0.00000  -0.03256   0.00000
 217        8PY         0.00000   0.00000   0.01264   0.00000   0.00000
 218        8PZ        -0.00507   0.01735   0.00000   0.00000  -0.01649
 219        9PX         0.00000   0.00000   0.00000   0.03770   0.00000
 220        9PY         0.00000   0.00000   0.03122   0.00000   0.00000
 221        9PZ        -0.01184   0.00186   0.00000   0.00000  -0.06052
 222       10D 0       -0.00043   0.00543   0.00000   0.00000   0.00398
 223       10D+1        0.00000   0.00000   0.00000  -0.03028   0.00000
 224       10D-1        0.00000   0.00000  -0.01189   0.00000   0.00000
 225       10D+2       -0.01213   0.00947   0.00000   0.00000   0.00587
 226       10D-2        0.00000   0.00000   0.00000   0.00000   0.00000
 227       11D 0       -0.00222   0.01037   0.00000   0.00000  -0.02759
 228       11D+1        0.00000   0.00000   0.00000  -0.07922   0.00000
 229       11D-1        0.00000   0.00000  -0.00859   0.00000   0.00000
 230       11D+2       -0.01311   0.03853   0.00000   0.00000   0.00966
 231       11D-2        0.00000   0.00000   0.00000   0.00000   0.00000
 232       12F 0        0.00270  -0.01134   0.00000   0.00000  -0.01331
 233       12F+1        0.00000   0.00000   0.00000  -0.01323   0.00000
 234       12F-1        0.00000   0.00000   0.00244   0.00000   0.00000
 235       12F+2        0.01121   0.02444   0.00000   0.00000   0.00441
 236       12F-2        0.00000   0.00000   0.00000   0.00000   0.00000
 237       12F+3        0.00000   0.00000   0.00000  -0.02168   0.00000
 238       12F-3        0.00000   0.00000   0.00241   0.00000   0.00000
 239 12  F  1S          0.01379   0.03425   0.00000  -0.02450  -0.00309
 240        2S         -0.03537  -0.08654   0.00000   0.05895   0.00609
 241        3S         -0.01154  -0.03011   0.00000   0.02176   0.00295
 242        4S         -0.03703  -0.11540   0.00000   0.10704   0.00608
 243        5PX        -0.02537  -0.18406   0.00000   0.14556   0.12888
 244        5PY         0.00000   0.00000   0.06980   0.00000   0.00000
 245        5PZ        -0.02912  -0.10392   0.00000   0.19765  -0.12529
 246        6PX        -0.03142  -0.22948   0.00000   0.17947   0.16291
 247        6PY         0.00000   0.00000   0.08771   0.00000   0.00000
 248        6PZ        -0.03630  -0.12869   0.00000   0.24462  -0.15583
 249        7PX        -0.01702  -0.14085   0.00000   0.10206   0.11721
 250        7PY         0.00000   0.00000   0.05972   0.00000   0.00000
 251        7PZ        -0.02006  -0.07433   0.00000   0.16203  -0.11289
 252        8D 0        0.00014  -0.00009   0.00000  -0.00055   0.00121
 253        8D+1        0.00055   0.00241   0.00000  -0.00285   0.00034
 254        8D-1        0.00000   0.00000  -0.00048   0.00000   0.00000
 255        8D+2        0.00023   0.00182   0.00000  -0.00160  -0.00097
 256        8D-2        0.00000   0.00000  -0.00054   0.00000   0.00000
 257        9D 0        0.00074  -0.00159   0.00000  -0.00562   0.00968
 258        9D+1        0.00278   0.01092   0.00000  -0.01213   0.00043
 259        9D-1        0.00000   0.00000  -0.00294   0.00000   0.00000
 260        9D+2        0.00128   0.00926   0.00000  -0.00369  -0.00648
 261        9D-2        0.00000   0.00000  -0.00398   0.00000   0.00000
 262       10F 0        0.00013   0.00105   0.00000  -0.00054  -0.00092
 263       10F+1       -0.00031  -0.00057   0.00000   0.00184  -0.00117
 264       10F-1        0.00000   0.00000   0.00017   0.00000   0.00000
 265       10F+2       -0.00035  -0.00192   0.00000   0.00171   0.00046
 266       10F-2        0.00000   0.00000   0.00063   0.00000   0.00000
 267       10F+3       -0.00011  -0.00119   0.00000   0.00055   0.00074
 268       10F-3        0.00000   0.00000   0.00050   0.00000   0.00000
 269 13  F  1S          0.01379   0.03425   0.00000   0.02450  -0.00309
 270        2S         -0.03537  -0.08654   0.00000  -0.05895   0.00609
 271        3S         -0.01154  -0.03011   0.00000  -0.02176   0.00295
 272        4S         -0.03703  -0.11540   0.00000  -0.10704   0.00608
 273        5PX         0.02537   0.18406   0.00000   0.14556  -0.12888
 274        5PY         0.00000   0.00000   0.06980   0.00000   0.00000
 275        5PZ        -0.02912  -0.10392   0.00000  -0.19765  -0.12529
 276        6PX         0.03142   0.22948   0.00000   0.17947  -0.16291
 277        6PY         0.00000   0.00000   0.08771   0.00000   0.00000
 278        6PZ        -0.03630  -0.12869   0.00000  -0.24462  -0.15583
 279        7PX         0.01702   0.14085   0.00000   0.10206  -0.11721
 280        7PY         0.00000   0.00000   0.05972   0.00000   0.00000
 281        7PZ        -0.02006  -0.07433   0.00000  -0.16203  -0.11289
 282        8D 0        0.00014  -0.00009   0.00000   0.00055   0.00121
 283        8D+1       -0.00055  -0.00241   0.00000  -0.00285  -0.00034
 284        8D-1        0.00000   0.00000  -0.00048   0.00000   0.00000
 285        8D+2        0.00023   0.00182   0.00000   0.00160  -0.00097
 286        8D-2        0.00000   0.00000   0.00054   0.00000   0.00000
 287        9D 0        0.00074  -0.00159   0.00000   0.00562   0.00968
 288        9D+1       -0.00278  -0.01092   0.00000  -0.01213  -0.00043
 289        9D-1        0.00000   0.00000  -0.00294   0.00000   0.00000
 290        9D+2        0.00128   0.00926   0.00000   0.00369  -0.00648
 291        9D-2        0.00000   0.00000   0.00398   0.00000   0.00000
 292       10F 0        0.00013   0.00105   0.00000   0.00054  -0.00092
 293       10F+1        0.00031   0.00057   0.00000   0.00184   0.00117
 294       10F-1        0.00000   0.00000   0.00017   0.00000   0.00000
 295       10F+2       -0.00035  -0.00192   0.00000  -0.00171   0.00046
 296       10F-2        0.00000   0.00000  -0.00063   0.00000   0.00000
 297       10F+3        0.00011   0.00119   0.00000   0.00055  -0.00074
 298       10F-3        0.00000   0.00000   0.00050   0.00000   0.00000
                          21        22        23        24        25
                        (B2)--O   (A1)--O   (A2)--O   (B1)--O   (B1)--O
     Eigenvalues --    -0.67387  -0.67146  -0.65680  -0.63954  -0.59245
   1 1   C  1S          0.02119  -0.00074   0.00000   0.00000   0.00000
   2        2S         -0.05262   0.00264   0.00000   0.00000   0.00000
   3        3S         -0.01152   0.00056   0.00000   0.00000   0.00000
   4        4S         -0.11743   0.01237   0.00000   0.00000   0.00000
   5        5PX         0.00000   0.00000   0.02586   0.03590   0.14821
   6        5PY        -0.02707  -0.05964   0.00000   0.00000   0.00000
   7        5PZ        -0.00451  -0.01430   0.00000   0.00000   0.00000
   8        6PX         0.00000   0.00000   0.02609   0.03143   0.18256
   9        6PY        -0.04434  -0.07419   0.00000   0.00000   0.00000
  10        6PZ        -0.00018  -0.01933   0.00000   0.00000   0.00000
  11        7PX         0.00000   0.00000   0.01548  -0.00919   0.08914
  12        7PY         0.00455  -0.03626   0.00000   0.00000   0.00000
  13        7PZ        -0.01281  -0.01573   0.00000   0.00000   0.00000
  14        8D 0        0.00323   0.00125   0.00000   0.00000   0.00000
  15        8D+1        0.00000   0.00000   0.00120   0.00106  -0.00037
  16        8D-1       -0.00118   0.00250   0.00000   0.00000   0.00000
  17        8D+2       -0.00071  -0.00338   0.00000   0.00000   0.00000
  18        8D-2        0.00000   0.00000   0.00139   0.00189   0.00909
  19        9D 0        0.01581  -0.00491   0.00000   0.00000   0.00000
  20        9D+1        0.00000   0.00000  -0.00099  -0.00568  -0.00098
  21        9D-1       -0.00265   0.00754   0.00000   0.00000   0.00000
  22        9D+2       -0.00873  -0.00872   0.00000   0.00000   0.00000
  23        9D-2        0.00000   0.00000  -0.01131  -0.01590   0.00300
  24       10F 0        0.00087   0.00134   0.00000   0.00000   0.00000
  25       10F+1        0.00000   0.00000   0.00079   0.00054   0.00093
  26       10F-1       -0.00102   0.00041   0.00000   0.00000   0.00000
  27       10F+2       -0.00159   0.00172   0.00000   0.00000   0.00000
  28       10F-2        0.00000   0.00000  -0.00144  -0.00060   0.00106
  29       10F+3        0.00000   0.00000  -0.00090  -0.00139  -0.00079
  30       10F-3       -0.00145   0.00128   0.00000   0.00000   0.00000
  31 2   H  1S         -0.02344  -0.02369   0.01515   0.01956   0.08498
  32        2S         -0.01185  -0.03717   0.03294   0.05376   0.13877
  33        3S         -0.01149  -0.00721   0.01669   0.02007   0.04692
  34        4PX         0.00171   0.00232  -0.00073  -0.00123  -0.00468
  35        4PY         0.00083   0.00064  -0.00102  -0.00179  -0.00606
  36        4PZ         0.00018   0.00003  -0.00031  -0.00011  -0.00115
  37        5PX        -0.00112   0.00419  -0.00632  -0.00753  -0.00656
  38        5PY        -0.00731   0.00002  -0.00498  -0.00666  -0.00940
  39        5PZ         0.00077   0.00003   0.00182   0.00040  -0.00121
  40        6D 0       -0.00014   0.00033  -0.00018  -0.00023  -0.00090
  41        6D+1        0.00003  -0.00016  -0.00019  -0.00010   0.00046
  42        6D-1       -0.00023   0.00010  -0.00045  -0.00034   0.00043
  43        6D+2       -0.00089  -0.00055   0.00002  -0.00016  -0.00027
  44        6D-2        0.00004  -0.00039   0.00086   0.00105   0.00206
  45 3   H  1S         -0.02344  -0.02369  -0.01515  -0.01956  -0.08498
  46        2S         -0.01185  -0.03717  -0.03294  -0.05376  -0.13877
  47        3S         -0.01149  -0.00721  -0.01669  -0.02007  -0.04692
  48        4PX        -0.00171  -0.00232  -0.00073  -0.00123  -0.00468
  49        4PY         0.00083   0.00064   0.00102   0.00179   0.00606
  50        4PZ         0.00018   0.00003   0.00031   0.00011   0.00115
  51        5PX         0.00112  -0.00419  -0.00632  -0.00753  -0.00656
  52        5PY        -0.00731   0.00002   0.00498   0.00666   0.00940
  53        5PZ         0.00077   0.00003  -0.00182  -0.00040   0.00121
  54        6D 0       -0.00014   0.00033   0.00018   0.00023   0.00090
  55        6D+1       -0.00003   0.00016  -0.00019  -0.00010   0.00046
  56        6D-1       -0.00023   0.00010   0.00045   0.00034  -0.00043
  57        6D+2       -0.00089  -0.00055  -0.00002   0.00016   0.00027
  58        6D-2       -0.00004   0.00039   0.00086   0.00105   0.00206
  59 4   H  1S          0.02344  -0.02369   0.01515  -0.01956  -0.08498
  60        2S          0.01185  -0.03717   0.03294  -0.05376  -0.13877
  61        3S          0.01149  -0.00721   0.01669  -0.02007  -0.04692
  62        4PX         0.00171  -0.00232   0.00073  -0.00123  -0.00468
  63        4PY         0.00083  -0.00064   0.00102  -0.00179  -0.00606
  64        4PZ        -0.00018   0.00003  -0.00031   0.00011   0.00115
  65        5PX        -0.00112  -0.00419   0.00632  -0.00753  -0.00656
  66        5PY        -0.00731  -0.00002   0.00498  -0.00666  -0.00940
  67        5PZ        -0.00077   0.00003   0.00182  -0.00040   0.00121
  68        6D 0        0.00014   0.00033  -0.00018   0.00023   0.00090
  69        6D+1        0.00003   0.00016   0.00019  -0.00010   0.00046
  70        6D-1       -0.00023  -0.00010   0.00045  -0.00034   0.00043
  71        6D+2        0.00089  -0.00055   0.00002   0.00016   0.00027
  72        6D-2       -0.00004  -0.00039   0.00086  -0.00105  -0.00206
  73 5   H  1S          0.02344  -0.02369  -0.01515   0.01956   0.08498
  74        2S          0.01185  -0.03717  -0.03294   0.05376   0.13877
  75        3S          0.01149  -0.00721  -0.01669   0.02007   0.04692
  76        4PX        -0.00171   0.00232   0.00073  -0.00123  -0.00468
  77        4PY         0.00083  -0.00064  -0.00102   0.00179   0.00606
  78        4PZ        -0.00018   0.00003   0.00031  -0.00011  -0.00115
  79        5PX         0.00112   0.00419   0.00632  -0.00753  -0.00656
  80        5PY        -0.00731  -0.00002  -0.00498   0.00666   0.00940
  81        5PZ        -0.00077   0.00003  -0.00182   0.00040  -0.00121
  82        6D 0        0.00014   0.00033   0.00018  -0.00023  -0.00090
  83        6D+1       -0.00003  -0.00016   0.00019  -0.00010   0.00046
  84        6D-1       -0.00023  -0.00010  -0.00045   0.00034  -0.00043
  85        6D+2        0.00089  -0.00055  -0.00002  -0.00016  -0.00027
  86        6D-2        0.00004   0.00039   0.00086  -0.00105  -0.00206
  87 6   C  1S         -0.02119  -0.00074   0.00000   0.00000   0.00000
  88        2S          0.05262   0.00264   0.00000   0.00000   0.00000
  89        3S          0.01152   0.00056   0.00000   0.00000   0.00000
  90        4S          0.11743   0.01237   0.00000   0.00000   0.00000
  91        5PX         0.00000   0.00000  -0.02586   0.03590   0.14821
  92        5PY        -0.02707   0.05964   0.00000   0.00000   0.00000
  93        5PZ         0.00451  -0.01430   0.00000   0.00000   0.00000
  94        6PX         0.00000   0.00000  -0.02609   0.03143   0.18256
  95        6PY        -0.04434   0.07419   0.00000   0.00000   0.00000
  96        6PZ         0.00018  -0.01933   0.00000   0.00000   0.00000
  97        7PX         0.00000   0.00000  -0.01548  -0.00919   0.08914
  98        7PY         0.00455   0.03626   0.00000   0.00000   0.00000
  99        7PZ         0.01281  -0.01573   0.00000   0.00000   0.00000
 100        8D 0       -0.00323   0.00125   0.00000   0.00000   0.00000
 101        8D+1        0.00000   0.00000  -0.00120   0.00106  -0.00037
 102        8D-1       -0.00118  -0.00250   0.00000   0.00000   0.00000
 103        8D+2        0.00071  -0.00338   0.00000   0.00000   0.00000
 104        8D-2        0.00000   0.00000   0.00139  -0.00189  -0.00909
 105        9D 0       -0.01581  -0.00491   0.00000   0.00000   0.00000
 106        9D+1        0.00000   0.00000   0.00099  -0.00568  -0.00098
 107        9D-1       -0.00265  -0.00754   0.00000   0.00000   0.00000
 108        9D+2        0.00873  -0.00872   0.00000   0.00000   0.00000
 109        9D-2        0.00000   0.00000  -0.01131   0.01590  -0.00300
 110       10F 0       -0.00087   0.00134   0.00000   0.00000   0.00000
 111       10F+1        0.00000   0.00000  -0.00079   0.00054   0.00093
 112       10F-1       -0.00102  -0.00041   0.00000   0.00000   0.00000
 113       10F+2        0.00159   0.00172   0.00000   0.00000   0.00000
 114       10F-2        0.00000   0.00000  -0.00144   0.00060  -0.00106
 115       10F+3        0.00000   0.00000   0.00090  -0.00139  -0.00079
 116       10F-3       -0.00145  -0.00128   0.00000   0.00000   0.00000
 117 7   C  1S          0.02629   0.00091   0.00000   0.00000   0.00000
 118        2S         -0.06425  -0.00351   0.00000   0.00000   0.00000
 119        3S         -0.01285  -0.00297   0.00000   0.00000   0.00000
 120        4S         -0.13380  -0.00707   0.00000   0.00000   0.00000
 121        5PX         0.00000   0.00000  -0.00338   0.01417   0.06545
 122        5PY         0.01980   0.06331   0.00000   0.00000   0.00000
 123        5PZ         0.02255   0.09891   0.00000   0.00000   0.00000
 124        6PX         0.00000   0.00000  -0.00295   0.01710   0.09285
 125        6PY         0.02059   0.07076   0.00000   0.00000   0.00000
 126        6PZ         0.03292   0.12037   0.00000   0.00000   0.00000
 127        7PX         0.00000   0.00000   0.00709   0.00979   0.04011
 128        7PY        -0.02744   0.03420   0.00000   0.00000   0.00000
 129        7PZ        -0.02337   0.05120   0.00000   0.00000   0.00000
 130        8D 0       -0.00202  -0.00272   0.00000   0.00000   0.00000
 131        8D+1        0.00000   0.00000  -0.00092   0.00057   0.00406
 132        8D-1       -0.00361  -0.00195   0.00000   0.00000   0.00000
 133        8D+2        0.00071  -0.00166   0.00000   0.00000   0.00000
 134        8D-2        0.00000   0.00000   0.00044   0.00034   0.00188
 135        9D 0       -0.00664   0.00160   0.00000   0.00000   0.00000
 136        9D+1        0.00000   0.00000   0.00343   0.00077   0.00677
 137        9D-1       -0.00593   0.00059   0.00000   0.00000   0.00000
 138        9D+2        0.00220  -0.00374   0.00000   0.00000   0.00000
 139        9D-2        0.00000   0.00000   0.00125   0.00134   0.00383
 140       10F 0        0.00056   0.00042   0.00000   0.00000   0.00000
 141       10F+1        0.00000   0.00000   0.00021  -0.00025   0.00148
 142       10F-1        0.00171  -0.00104   0.00000   0.00000   0.00000
 143       10F+2       -0.00058  -0.00287   0.00000   0.00000   0.00000
 144       10F-2        0.00000   0.00000   0.00016   0.00009  -0.00083
 145       10F+3        0.00000   0.00000   0.00006  -0.00076  -0.00276
 146       10F-3        0.00055  -0.00160   0.00000   0.00000   0.00000
 147 8   H  1S         -0.03586  -0.07358   0.00000   0.00000   0.00000
 148        2S         -0.04480  -0.11410   0.00000   0.00000   0.00000
 149        3S         -0.03012  -0.02629   0.00000   0.00000   0.00000
 150        4PX         0.00000   0.00000   0.00002   0.00016   0.00116
 151        4PY        -0.00148  -0.00379   0.00000   0.00000   0.00000
 152        4PZ        -0.00277  -0.00599   0.00000   0.00000   0.00000
 153        5PX         0.00000   0.00000   0.00036   0.00136   0.00377
 154        5PY         0.00283  -0.00516   0.00000   0.00000   0.00000
 155        5PZ         0.00052  -0.00798   0.00000   0.00000   0.00000
 156        6D 0       -0.00048  -0.00099   0.00000   0.00000   0.00000
 157        6D+1        0.00000   0.00000   0.00004   0.00022   0.00030
 158        6D-1       -0.00001  -0.00169   0.00000   0.00000   0.00000
 159        6D+2       -0.00024   0.00051   0.00000   0.00000   0.00000
 160        6D-2        0.00000   0.00000   0.00012   0.00011   0.00023
 161 9   C  1S         -0.02629   0.00091   0.00000   0.00000   0.00000
 162        2S          0.06425  -0.00351   0.00000   0.00000   0.00000
 163        3S          0.01285  -0.00297   0.00000   0.00000   0.00000
 164        4S          0.13380  -0.00707   0.00000   0.00000   0.00000
 165        5PX         0.00000   0.00000   0.00338   0.01417   0.06545
 166        5PY         0.01980  -0.06331   0.00000   0.00000   0.00000
 167        5PZ        -0.02255   0.09891   0.00000   0.00000   0.00000
 168        6PX         0.00000   0.00000   0.00295   0.01710   0.09285
 169        6PY         0.02059  -0.07076   0.00000   0.00000   0.00000
 170        6PZ        -0.03292   0.12037   0.00000   0.00000   0.00000
 171        7PX         0.00000   0.00000  -0.00709   0.00979   0.04011
 172        7PY        -0.02744  -0.03420   0.00000   0.00000   0.00000
 173        7PZ         0.02337   0.05120   0.00000   0.00000   0.00000
 174        8D 0        0.00202  -0.00272   0.00000   0.00000   0.00000
 175        8D+1        0.00000   0.00000   0.00092   0.00057   0.00406
 176        8D-1       -0.00361   0.00195   0.00000   0.00000   0.00000
 177        8D+2       -0.00071  -0.00166   0.00000   0.00000   0.00000
 178        8D-2        0.00000   0.00000   0.00044  -0.00034  -0.00188
 179        9D 0        0.00664   0.00160   0.00000   0.00000   0.00000
 180        9D+1        0.00000   0.00000  -0.00343   0.00077   0.00677
 181        9D-1       -0.00593  -0.00059   0.00000   0.00000   0.00000
 182        9D+2       -0.00220  -0.00374   0.00000   0.00000   0.00000
 183        9D-2        0.00000   0.00000   0.00125  -0.00134  -0.00383
 184       10F 0       -0.00056   0.00042   0.00000   0.00000   0.00000
 185       10F+1        0.00000   0.00000  -0.00021  -0.00025   0.00148
 186       10F-1        0.00171   0.00104   0.00000   0.00000   0.00000
 187       10F+2        0.00058  -0.00287   0.00000   0.00000   0.00000
 188       10F-2        0.00000   0.00000   0.00016  -0.00009   0.00083
 189       10F+3        0.00000   0.00000  -0.00006  -0.00076  -0.00276
 190       10F-3        0.00055   0.00160   0.00000   0.00000   0.00000
 191 10  H  1S          0.03586  -0.07358   0.00000   0.00000   0.00000
 192        2S          0.04480  -0.11410   0.00000   0.00000   0.00000
 193        3S          0.03012  -0.02629   0.00000   0.00000   0.00000
 194        4PX         0.00000   0.00000  -0.00002   0.00016   0.00116
 195        4PY        -0.00148   0.00379   0.00000   0.00000   0.00000
 196        4PZ         0.00277  -0.00599   0.00000   0.00000   0.00000
 197        5PX         0.00000   0.00000  -0.00036   0.00136   0.00377
 198        5PY         0.00283   0.00516   0.00000   0.00000   0.00000
 199        5PZ        -0.00052  -0.00798   0.00000   0.00000   0.00000
 200        6D 0        0.00048  -0.00099   0.00000   0.00000   0.00000
 201        6D+1        0.00000   0.00000  -0.00004   0.00022   0.00030
 202        6D-1       -0.00001   0.00169   0.00000   0.00000   0.00000
 203        6D+2        0.00024   0.00051   0.00000   0.00000   0.00000
 204        6D-2        0.00000   0.00000   0.00012  -0.00011  -0.00023
 205 11  Si 1S          0.00000  -0.00070   0.00000   0.00000   0.00000
 206        2S          0.00000   0.00489   0.00000   0.00000   0.00000
 207        3S          0.00000  -0.00061   0.00000   0.00000   0.00000
 208        4S          0.00000   0.00138   0.00000   0.00000   0.00000
 209        5S          0.00000  -0.04333   0.00000   0.00000   0.00000
 210        6PX         0.00000   0.00000   0.00000   0.00499  -0.00298
 211        6PY        -0.04678   0.00000   0.00000   0.00000   0.00000
 212        6PZ         0.00000   0.01522   0.00000   0.00000   0.00000
 213        7PX         0.00000   0.00000   0.00000  -0.02641   0.01407
 214        7PY         0.09370   0.00000   0.00000   0.00000   0.00000
 215        7PZ         0.00000  -0.04267   0.00000   0.00000   0.00000
 216        8PX         0.00000   0.00000   0.00000  -0.00159  -0.00156
 217        8PY         0.01168   0.00000   0.00000   0.00000   0.00000
 218        8PZ         0.00000  -0.00385   0.00000   0.00000   0.00000
 219        9PX         0.00000   0.00000   0.00000   0.04710  -0.00549
 220        9PY         0.07897   0.00000   0.00000   0.00000   0.00000
 221        9PZ         0.00000   0.05653   0.00000   0.00000   0.00000
 222       10D 0        0.00000   0.00943   0.00000   0.00000   0.00000
 223       10D+1        0.00000   0.00000   0.00000  -0.03558  -0.00827
 224       10D-1        0.01171   0.00000   0.00000   0.00000   0.00000
 225       10D+2        0.00000  -0.02696   0.00000   0.00000   0.00000
 226       10D-2        0.00000   0.00000   0.02794   0.00000   0.00000
 227       11D 0        0.00000   0.04816   0.00000   0.00000   0.00000
 228       11D+1        0.00000   0.00000   0.00000  -0.05903  -0.02234
 229       11D-1        0.03895   0.00000   0.00000   0.00000   0.00000
 230       11D+2        0.00000  -0.03871   0.00000   0.00000   0.00000
 231       11D-2        0.00000   0.00000   0.05214   0.00000   0.00000
 232       12F 0        0.00000   0.01590   0.00000   0.00000   0.00000
 233       12F+1        0.00000   0.00000   0.00000  -0.04189   0.01108
 234       12F-1        0.00914   0.00000   0.00000   0.00000   0.00000
 235       12F+2        0.00000  -0.00869   0.00000   0.00000   0.00000
 236       12F-2        0.00000   0.00000   0.03056   0.00000   0.00000
 237       12F+3        0.00000   0.00000   0.00000   0.00196  -0.01469
 238       12F-3        0.02420   0.00000   0.00000   0.00000   0.00000
 239 12  F  1S          0.00000  -0.00289   0.00000  -0.00159   0.00081
 240        2S          0.00000   0.00744   0.00000   0.00408  -0.00255
 241        3S          0.00000   0.00266   0.00000   0.00151  -0.00054
 242        4S          0.00000   0.02347   0.00000   0.02733  -0.00052
 243        5PX         0.00000  -0.06301   0.00000   0.21741  -0.02917
 244        5PY         0.24014   0.00000   0.25925   0.00000   0.00000
 245        5PZ         0.00000   0.17103   0.00000  -0.14278   0.07730
 246        6PX         0.00000  -0.08093   0.00000   0.26784  -0.03626
 247        6PY         0.30103   0.00000   0.32257   0.00000   0.00000
 248        6PZ         0.00000   0.21315   0.00000  -0.17999   0.09559
 249        7PX         0.00000  -0.06467   0.00000   0.18633  -0.02810
 250        7PY         0.21445   0.00000   0.23852   0.00000   0.00000
 251        7PZ         0.00000   0.14765   0.00000  -0.13884   0.07430
 252        8D 0        0.00000  -0.00116   0.00000   0.00141  -0.00039
 253        8D+1        0.00000  -0.00111   0.00000  -0.00086  -0.00034
 254        8D-1       -0.00110   0.00000  -0.00119   0.00000   0.00000
 255        8D+2        0.00000   0.00037   0.00000  -0.00140  -0.00009
 256        8D-2       -0.00151   0.00000  -0.00153   0.00000   0.00000
 257        9D 0        0.00000  -0.00848   0.00000   0.00979  -0.00276
 258        9D+1        0.00000  -0.00402   0.00000   0.00101  -0.00185
 259        9D-1       -0.00794   0.00000  -0.00865   0.00000   0.00000
 260        9D+2        0.00000   0.00324   0.00000  -0.00671   0.00132
 261        9D-2       -0.01162   0.00000  -0.01028   0.00000   0.00000
 262       10F 0        0.00000   0.00042   0.00000  -0.00097   0.00015
 263       10F+1        0.00000   0.00125   0.00000  -0.00141   0.00059
 264       10F-1        0.00034   0.00000   0.00050   0.00000   0.00000
 265       10F+2        0.00000   0.00029   0.00000   0.00053   0.00007
 266       10F-2        0.00163   0.00000   0.00158   0.00000   0.00000
 267       10F+3        0.00000  -0.00023   0.00000   0.00095  -0.00024
 268       10F-3        0.00141   0.00000   0.00121   0.00000   0.00000
 269 13  F  1S          0.00000  -0.00289   0.00000   0.00159  -0.00081
 270        2S          0.00000   0.00744   0.00000  -0.00408   0.00255
 271        3S          0.00000   0.00266   0.00000  -0.00151   0.00054
 272        4S          0.00000   0.02347   0.00000  -0.02733   0.00052
 273        5PX         0.00000   0.06301   0.00000   0.21741  -0.02917
 274        5PY         0.24014   0.00000  -0.25925   0.00000   0.00000
 275        5PZ         0.00000   0.17103   0.00000   0.14278  -0.07730
 276        6PX         0.00000   0.08093   0.00000   0.26784  -0.03626
 277        6PY         0.30103   0.00000  -0.32257   0.00000   0.00000
 278        6PZ         0.00000   0.21315   0.00000   0.17999  -0.09559
 279        7PX         0.00000   0.06467   0.00000   0.18633  -0.02810
 280        7PY         0.21445   0.00000  -0.23852   0.00000   0.00000
 281        7PZ         0.00000   0.14765   0.00000   0.13884  -0.07430
 282        8D 0        0.00000  -0.00116   0.00000  -0.00141   0.00039
 283        8D+1        0.00000   0.00111   0.00000  -0.00086  -0.00034
 284        8D-1       -0.00110   0.00000   0.00119   0.00000   0.00000
 285        8D+2        0.00000   0.00037   0.00000   0.00140   0.00009
 286        8D-2        0.00151   0.00000  -0.00153   0.00000   0.00000
 287        9D 0        0.00000  -0.00848   0.00000  -0.00979   0.00276
 288        9D+1        0.00000   0.00402   0.00000   0.00101  -0.00185
 289        9D-1       -0.00794   0.00000   0.00865   0.00000   0.00000
 290        9D+2        0.00000   0.00324   0.00000   0.00671  -0.00132
 291        9D-2        0.01162   0.00000  -0.01028   0.00000   0.00000
 292       10F 0        0.00000   0.00042   0.00000   0.00097  -0.00015
 293       10F+1        0.00000  -0.00125   0.00000  -0.00141   0.00059
 294       10F-1        0.00034   0.00000  -0.00050   0.00000   0.00000
 295       10F+2        0.00000   0.00029   0.00000  -0.00053  -0.00007
 296       10F-2       -0.00163   0.00000   0.00158   0.00000   0.00000
 297       10F+3        0.00000   0.00023   0.00000   0.00095  -0.00024
 298       10F-3        0.00141   0.00000  -0.00121   0.00000   0.00000
                          26        27        28        29        30
                        (A2)--O   (A1)--O   (B2)--O   (A1)--O   (B2)--O
     Eigenvalues --    -0.56870  -0.55503  -0.51804  -0.51239  -0.42939
   1 1   C  1S          0.00000  -0.00309   0.02131  -0.00231  -0.01109
   2        2S          0.00000   0.00514  -0.05874   0.00784   0.03054
   3        3S          0.00000   0.00250  -0.01157   0.00070   0.00664
   4        4S          0.00000   0.02261   0.00076   0.01431   0.06356
   5        5PX         0.16317   0.00000   0.00000   0.00000   0.00000
   6        5PY         0.00000   0.06494   0.14342  -0.09739  -0.09787
   7        5PZ         0.00000   0.12094   0.05966   0.08560   0.14399
   8        6PX         0.20480   0.00000   0.00000   0.00000   0.00000
   9        6PY         0.00000   0.08500   0.18426  -0.13162  -0.12382
  10        6PZ         0.00000   0.15973   0.07427   0.11355   0.18746
  11        7PX         0.10387   0.00000   0.00000   0.00000   0.00000
  12        7PY         0.00000   0.03996   0.08073  -0.07954  -0.08359
  13        7PZ         0.00000   0.05798   0.02891   0.05323   0.13951
  14        8D 0        0.00000  -0.01030  -0.00878   0.00354   0.00177
  15        8D+1        0.00071   0.00000   0.00000   0.00000   0.00000
  16        8D-1        0.00000  -0.00632  -0.00428  -0.00901  -0.00861
  17        8D+2        0.00000   0.00208   0.00457  -0.00328  -0.00235
  18        8D-2        0.01200   0.00000   0.00000   0.00000   0.00000
  19        9D 0        0.00000  -0.01235  -0.00571   0.00479   0.00359
  20        9D+1        0.00470   0.00000   0.00000   0.00000   0.00000
  21        9D-1        0.00000  -0.00836  -0.00887  -0.01457  -0.01205
  22        9D+2        0.00000   0.00595   0.01049  -0.00870   0.00110
  23        9D-2        0.00937   0.00000   0.00000   0.00000   0.00000
  24       10F 0        0.00000   0.00215   0.00055  -0.00120   0.00057
  25       10F+1        0.00039   0.00000   0.00000   0.00000   0.00000
  26       10F-1        0.00000   0.00223   0.00167   0.00127   0.00039
  27       10F+2        0.00000  -0.00117  -0.00166  -0.00261  -0.00076
  28       10F-2        0.00061   0.00000   0.00000   0.00000   0.00000
  29       10F+3       -0.00056   0.00000   0.00000   0.00000   0.00000
  30       10F-3        0.00000   0.00051  -0.00016   0.00049  -0.00033
  31 2   H  1S          0.09711   0.03973   0.05384  -0.03622  -0.02761
  32        2S          0.15479   0.05803   0.08475  -0.05018  -0.04904
  33        3S          0.05608   0.02586   0.04401  -0.02332  -0.03152
  34        4PX        -0.00528  -0.00346  -0.00489   0.00324   0.00246
  35        4PY        -0.00668  -0.00115  -0.00054   0.00022  -0.00047
  36        4PZ        -0.00094   0.00239   0.00071   0.00206   0.00381
  37        5PX        -0.00477  -0.00360  -0.00766   0.00283   0.00433
  38        5PY        -0.00849   0.00140   0.00299  -0.00492  -0.00237
  39        5PZ        -0.00292   0.00749   0.00273   0.00610   0.00919
  40        6D 0       -0.00094  -0.00094  -0.00077   0.00007   0.00016
  41        6D+1        0.00048  -0.00109  -0.00038  -0.00076  -0.00156
  42        6D-1        0.00056  -0.00117  -0.00040  -0.00079  -0.00143
  43        6D+2       -0.00030   0.00078   0.00152  -0.00106  -0.00089
  44        6D-2        0.00198   0.00029   0.00046  -0.00010  -0.00004
  45 3   H  1S         -0.09711   0.03973   0.05384  -0.03622  -0.02761
  46        2S         -0.15479   0.05803   0.08475  -0.05018  -0.04904
  47        3S         -0.05608   0.02586   0.04401  -0.02332  -0.03152
  48        4PX        -0.00528   0.00346   0.00489  -0.00324  -0.00246
  49        4PY         0.00668  -0.00115  -0.00054   0.00022  -0.00047
  50        4PZ         0.00094   0.00239   0.00071   0.00206   0.00381
  51        5PX        -0.00477   0.00360   0.00766  -0.00283  -0.00433
  52        5PY         0.00849   0.00140   0.00299  -0.00492  -0.00237
  53        5PZ         0.00292   0.00749   0.00273   0.00610   0.00919
  54        6D 0        0.00094  -0.00094  -0.00077   0.00007   0.00016
  55        6D+1        0.00048   0.00109   0.00038   0.00076   0.00156
  56        6D-1       -0.00056  -0.00117  -0.00040  -0.00079  -0.00143
  57        6D+2        0.00030   0.00078   0.00152  -0.00106  -0.00089
  58        6D-2        0.00198  -0.00029  -0.00046   0.00010   0.00004
  59 4   H  1S          0.09711   0.03973  -0.05384  -0.03622   0.02761
  60        2S          0.15479   0.05803  -0.08475  -0.05018   0.04904
  61        3S          0.05608   0.02586  -0.04401  -0.02332   0.03152
  62        4PX         0.00528   0.00346  -0.00489  -0.00324   0.00246
  63        4PY         0.00668   0.00115  -0.00054  -0.00022  -0.00047
  64        4PZ        -0.00094   0.00239  -0.00071   0.00206  -0.00381
  65        5PX         0.00477   0.00360  -0.00766  -0.00283   0.00433
  66        5PY         0.00849  -0.00140   0.00299   0.00492  -0.00237
  67        5PZ        -0.00292   0.00749  -0.00273   0.00610  -0.00919
  68        6D 0       -0.00094  -0.00094   0.00077   0.00007  -0.00016
  69        6D+1       -0.00048   0.00109  -0.00038   0.00076  -0.00156
  70        6D-1       -0.00056   0.00117  -0.00040   0.00079  -0.00143
  71        6D+2       -0.00030   0.00078  -0.00152  -0.00106   0.00089
  72        6D-2        0.00198   0.00029  -0.00046  -0.00010   0.00004
  73 5   H  1S         -0.09711   0.03973  -0.05384  -0.03622   0.02761
  74        2S         -0.15479   0.05803  -0.08475  -0.05018   0.04904
  75        3S         -0.05608   0.02586  -0.04401  -0.02332   0.03152
  76        4PX         0.00528  -0.00346   0.00489   0.00324  -0.00246
  77        4PY        -0.00668   0.00115  -0.00054  -0.00022  -0.00047
  78        4PZ         0.00094   0.00239  -0.00071   0.00206  -0.00381
  79        5PX         0.00477  -0.00360   0.00766   0.00283  -0.00433
  80        5PY        -0.00849  -0.00140   0.00299   0.00492  -0.00237
  81        5PZ         0.00292   0.00749  -0.00273   0.00610  -0.00919
  82        6D 0        0.00094  -0.00094   0.00077   0.00007  -0.00016
  83        6D+1       -0.00048  -0.00109   0.00038  -0.00076   0.00156
  84        6D-1        0.00056   0.00117  -0.00040   0.00079  -0.00143
  85        6D+2        0.00030   0.00078  -0.00152  -0.00106   0.00089
  86        6D-2        0.00198  -0.00029   0.00046   0.00010  -0.00004
  87 6   C  1S          0.00000  -0.00309  -0.02131  -0.00231   0.01109
  88        2S          0.00000   0.00514   0.05874   0.00784  -0.03054
  89        3S          0.00000   0.00250   0.01157   0.00070  -0.00664
  90        4S          0.00000   0.02261  -0.00076   0.01431  -0.06356
  91        5PX        -0.16317   0.00000   0.00000   0.00000   0.00000
  92        5PY         0.00000  -0.06494   0.14342   0.09739  -0.09787
  93        5PZ         0.00000   0.12094  -0.05966   0.08560  -0.14399
  94        6PX        -0.20480   0.00000   0.00000   0.00000   0.00000
  95        6PY         0.00000  -0.08500   0.18426   0.13162  -0.12382
  96        6PZ         0.00000   0.15973  -0.07427   0.11355  -0.18746
  97        7PX        -0.10387   0.00000   0.00000   0.00000   0.00000
  98        7PY         0.00000  -0.03996   0.08073   0.07954  -0.08359
  99        7PZ         0.00000   0.05798  -0.02891   0.05323  -0.13951
 100        8D 0        0.00000  -0.01030   0.00878   0.00354  -0.00177
 101        8D+1       -0.00071   0.00000   0.00000   0.00000   0.00000
 102        8D-1        0.00000   0.00632  -0.00428   0.00901  -0.00861
 103        8D+2        0.00000   0.00208  -0.00457  -0.00328   0.00235
 104        8D-2        0.01200   0.00000   0.00000   0.00000   0.00000
 105        9D 0        0.00000  -0.01235   0.00571   0.00479  -0.00359
 106        9D+1       -0.00470   0.00000   0.00000   0.00000   0.00000
 107        9D-1        0.00000   0.00836  -0.00887   0.01457  -0.01205
 108        9D+2        0.00000   0.00595  -0.01049  -0.00870  -0.00110
 109        9D-2        0.00937   0.00000   0.00000   0.00000   0.00000
 110       10F 0        0.00000   0.00215  -0.00055  -0.00120  -0.00057
 111       10F+1       -0.00039   0.00000   0.00000   0.00000   0.00000
 112       10F-1        0.00000  -0.00223   0.00167  -0.00127   0.00039
 113       10F+2        0.00000  -0.00117   0.00166  -0.00261   0.00076
 114       10F-2        0.00061   0.00000   0.00000   0.00000   0.00000
 115       10F+3        0.00056   0.00000   0.00000   0.00000   0.00000
 116       10F-3        0.00000  -0.00051  -0.00016  -0.00049  -0.00033
 117 7   C  1S          0.00000   0.00194  -0.01379   0.01951   0.00207
 118        2S          0.00000  -0.00738   0.03800  -0.05189  -0.00416
 119        3S          0.00000  -0.00005   0.00629  -0.01039  -0.00196
 120        4S          0.00000  -0.03552   0.05099  -0.03162   0.02767
 121        5PX        -0.02361   0.00000   0.00000   0.00000   0.00000
 122        5PY         0.00000   0.17889  -0.00151  -0.08054  -0.00980
 123        5PZ         0.00000  -0.07226   0.13310  -0.07966   0.07473
 124        6PX        -0.03220   0.00000   0.00000   0.00000   0.00000
 125        6PY         0.00000   0.21531  -0.00274  -0.08994  -0.01163
 126        6PZ         0.00000  -0.10138   0.17254  -0.09695   0.09900
 127        7PX        -0.00915   0.00000   0.00000   0.00000   0.00000
 128        7PY         0.00000   0.08955   0.00056  -0.04164   0.03420
 129        7PZ         0.00000  -0.03911   0.11473  -0.04473   0.07120
 130        8D 0        0.00000  -0.01258   0.00388   0.00912  -0.00420
 131        8D+1       -0.00351   0.00000   0.00000   0.00000   0.00000
 132        8D-1        0.00000   0.00226  -0.01511   0.00538  -0.01114
 133        8D+2        0.00000  -0.00731   0.00102   0.00587  -0.00237
 134        8D-2        0.00321   0.00000   0.00000   0.00000   0.00000
 135        9D 0        0.00000  -0.01085   0.00851   0.01293  -0.00960
 136        9D+1       -0.00893   0.00000   0.00000   0.00000   0.00000
 137        9D-1        0.00000   0.00773  -0.03220   0.00588  -0.02451
 138        9D+2        0.00000  -0.00244   0.00143   0.00838  -0.00650
 139        9D-2        0.00937   0.00000   0.00000   0.00000   0.00000
 140       10F 0        0.00000   0.00037   0.00547   0.00200  -0.00129
 141       10F+1       -0.00156   0.00000   0.00000   0.00000   0.00000
 142       10F-1        0.00000   0.00033  -0.00306   0.00260  -0.00122
 143       10F+2        0.00000   0.00316   0.00051   0.00274  -0.00297
 144       10F-2        0.00193   0.00000   0.00000   0.00000   0.00000
 145       10F+3        0.00038   0.00000   0.00000   0.00000   0.00000
 146       10F-3        0.00000  -0.00353   0.00001   0.00185   0.00008
 147 8   H  1S          0.00000  -0.02451  -0.07863   0.07060  -0.05796
 148        2S          0.00000  -0.04561  -0.11243   0.11971  -0.08168
 149        3S          0.00000  -0.01878  -0.04873   0.05623  -0.04758
 150        4PX        -0.00054   0.00000   0.00000   0.00000   0.00000
 151        4PY         0.00000   0.00230  -0.00355   0.00340  -0.00320
 152        4PZ         0.00000  -0.00391  -0.00537   0.00505  -0.00280
 153        5PX        -0.00166   0.00000   0.00000   0.00000   0.00000
 154        5PY         0.00000   0.00370  -0.00369   0.00343  -0.00257
 155        5PZ         0.00000  -0.01004  -0.00023   0.00764   0.00270
 156        6D 0        0.00000  -0.00257  -0.00106   0.00073   0.00057
 157        6D+1       -0.00032   0.00000   0.00000   0.00000   0.00000
 158        6D-1        0.00000   0.00044  -0.00109   0.00173  -0.00123
 159        6D+2        0.00000  -0.00107  -0.00004  -0.00050   0.00033
 160        6D-2       -0.00015   0.00000   0.00000   0.00000   0.00000
 161 9   C  1S          0.00000   0.00194   0.01379   0.01951  -0.00207
 162        2S          0.00000  -0.00738  -0.03800  -0.05189   0.00416
 163        3S          0.00000  -0.00005  -0.00629  -0.01039   0.00196
 164        4S          0.00000  -0.03552  -0.05099  -0.03162  -0.02767
 165        5PX         0.02361   0.00000   0.00000   0.00000   0.00000
 166        5PY         0.00000  -0.17889  -0.00151   0.08054  -0.00980
 167        5PZ         0.00000  -0.07226  -0.13310  -0.07966  -0.07473
 168        6PX         0.03220   0.00000   0.00000   0.00000   0.00000
 169        6PY         0.00000  -0.21531  -0.00274   0.08994  -0.01163
 170        6PZ         0.00000  -0.10138  -0.17254  -0.09695  -0.09900
 171        7PX         0.00915   0.00000   0.00000   0.00000   0.00000
 172        7PY         0.00000  -0.08955   0.00056   0.04164   0.03420
 173        7PZ         0.00000  -0.03911  -0.11473  -0.04473  -0.07120
 174        8D 0        0.00000  -0.01258  -0.00388   0.00912   0.00420
 175        8D+1        0.00351   0.00000   0.00000   0.00000   0.00000
 176        8D-1        0.00000  -0.00226  -0.01511  -0.00538  -0.01114
 177        8D+2        0.00000  -0.00731  -0.00102   0.00587   0.00237
 178        8D-2        0.00321   0.00000   0.00000   0.00000   0.00000
 179        9D 0        0.00000  -0.01085  -0.00851   0.01293   0.00960
 180        9D+1        0.00893   0.00000   0.00000   0.00000   0.00000
 181        9D-1        0.00000  -0.00773  -0.03220  -0.00588  -0.02451
 182        9D+2        0.00000  -0.00244  -0.00143   0.00838   0.00650
 183        9D-2        0.00937   0.00000   0.00000   0.00000   0.00000
 184       10F 0        0.00000   0.00037  -0.00547   0.00200   0.00129
 185       10F+1        0.00156   0.00000   0.00000   0.00000   0.00000
 186       10F-1        0.00000  -0.00033  -0.00306  -0.00260  -0.00122
 187       10F+2        0.00000   0.00316  -0.00051   0.00274   0.00297
 188       10F-2        0.00193   0.00000   0.00000   0.00000   0.00000
 189       10F+3       -0.00038   0.00000   0.00000   0.00000   0.00000
 190       10F-3        0.00000   0.00353   0.00001  -0.00185   0.00008
 191 10  H  1S          0.00000  -0.02451   0.07863   0.07060   0.05796
 192        2S          0.00000  -0.04561   0.11243   0.11971   0.08168
 193        3S          0.00000  -0.01878   0.04873   0.05623   0.04758
 194        4PX         0.00054   0.00000   0.00000   0.00000   0.00000
 195        4PY         0.00000  -0.00230  -0.00355  -0.00340  -0.00320
 196        4PZ         0.00000  -0.00391   0.00537   0.00505   0.00280
 197        5PX         0.00166   0.00000   0.00000   0.00000   0.00000
 198        5PY         0.00000  -0.00370  -0.00369  -0.00343  -0.00257
 199        5PZ         0.00000  -0.01004   0.00023   0.00764  -0.00270
 200        6D 0        0.00000  -0.00257   0.00106   0.00073  -0.00057
 201        6D+1        0.00032   0.00000   0.00000   0.00000   0.00000
 202        6D-1        0.00000  -0.00044  -0.00109  -0.00173  -0.00123
 203        6D+2        0.00000  -0.00107   0.00004  -0.00050  -0.00033
 204        6D-2       -0.00015   0.00000   0.00000   0.00000   0.00000
 205 11  Si 1S          0.00000   0.00524   0.00000   0.02764   0.00000
 206        2S          0.00000  -0.01893   0.00000  -0.10685   0.00000
 207        3S          0.00000   0.04817   0.00000   0.24201   0.00000
 208        4S          0.00000   0.00337   0.00000   0.03425   0.00000
 209        5S          0.00000   0.03782   0.00000   0.09040   0.00000
 210        6PX         0.00000   0.00000   0.00000   0.00000   0.00000
 211        6PY         0.00000   0.00000   0.03322   0.00000  -0.11907
 212        6PZ         0.00000   0.01547   0.00000   0.09389   0.00000
 213        7PX         0.00000   0.00000   0.00000   0.00000   0.00000
 214        7PY         0.00000   0.00000  -0.08515   0.00000   0.29636
 215        7PZ         0.00000  -0.03954   0.00000  -0.21741   0.00000
 216        8PX         0.00000   0.00000   0.00000   0.00000   0.00000
 217        8PY         0.00000   0.00000  -0.00916   0.00000   0.03421
 218        8PZ         0.00000  -0.00489   0.00000  -0.02785   0.00000
 219        9PX         0.00000   0.00000   0.00000   0.00000   0.00000
 220        9PY         0.00000   0.00000  -0.02754   0.00000   0.04156
 221        9PZ         0.00000  -0.00268   0.00000  -0.00621   0.00000
 222       10D 0        0.00000  -0.01740   0.00000  -0.00368   0.00000
 223       10D+1        0.00000   0.00000   0.00000   0.00000   0.00000
 224       10D-1        0.00000   0.00000   0.03330   0.00000  -0.06412
 225       10D+2        0.00000  -0.02377   0.00000  -0.04175   0.00000
 226       10D-2        0.01309   0.00000   0.00000   0.00000   0.00000
 227       11D 0        0.00000  -0.01379   0.00000   0.00812   0.00000
 228       11D+1        0.00000   0.00000   0.00000   0.00000   0.00000
 229       11D-1        0.00000   0.00000   0.03831   0.00000  -0.08399
 230       11D+2        0.00000  -0.03317   0.00000  -0.06613   0.00000
 231       11D-2        0.01264   0.00000   0.00000   0.00000   0.00000
 232       12F 0        0.00000   0.01232   0.00000   0.02056   0.00000
 233       12F+1        0.00000   0.00000   0.00000   0.00000   0.00000
 234       12F-1        0.00000   0.00000  -0.01630   0.00000   0.00804
 235       12F+2        0.00000   0.00001   0.00000  -0.00133   0.00000
 236       12F-2       -0.01564   0.00000   0.00000   0.00000   0.00000
 237       12F+3        0.00000   0.00000   0.00000   0.00000   0.00000
 238       12F-3        0.00000   0.00000   0.00211   0.00000  -0.01853
 239 12  F  1S          0.00000   0.00185   0.00000   0.00508   0.00000
 240        2S          0.00000  -0.00490   0.00000  -0.01363   0.00000
 241        3S          0.00000  -0.00132   0.00000  -0.00365   0.00000
 242        4S          0.00000  -0.00038   0.00000  -0.00462   0.00000
 243        5PX         0.00000   0.01675   0.00000   0.03901   0.00000
 244        5PY        -0.05117   0.00000   0.00687   0.00000  -0.06653
 245        5PZ         0.00000   0.03608   0.00000   0.08633   0.00000
 246        6PX         0.00000   0.02075   0.00000   0.04795   0.00000
 247        6PY        -0.06260   0.00000   0.00872   0.00000  -0.08268
 248        6PZ         0.00000   0.04423   0.00000   0.10689   0.00000
 249        7PX         0.00000   0.01246   0.00000   0.03168   0.00000
 250        7PY        -0.05301   0.00000   0.00689   0.00000  -0.07111
 251        7PZ         0.00000   0.03441   0.00000   0.08055   0.00000
 252        8D 0        0.00000  -0.00012   0.00000  -0.00012   0.00000
 253        8D+1        0.00000  -0.00036   0.00000  -0.00073   0.00000
 254        8D-1       -0.00003   0.00000  -0.00002   0.00000  -0.00019
 255        8D+2        0.00000  -0.00027   0.00000  -0.00040   0.00000
 256        8D-2        0.00025   0.00000   0.00003   0.00000  -0.00008
 257        9D 0        0.00000  -0.00068   0.00000  -0.00088   0.00000
 258        9D+1        0.00000  -0.00110   0.00000  -0.00234   0.00000
 259        9D-1        0.00128   0.00000   0.00042   0.00000  -0.00071
 260        9D+2        0.00000  -0.00076   0.00000  -0.00191   0.00000
 261        9D-2        0.00163   0.00000  -0.00025   0.00000   0.00073
 262       10F 0        0.00000  -0.00001   0.00000  -0.00022   0.00000
 263       10F+1        0.00000   0.00016   0.00000   0.00026   0.00000
 264       10F-1       -0.00007   0.00000  -0.00011   0.00000   0.00021
 265       10F+2        0.00000   0.00024   0.00000   0.00064   0.00000
 266       10F-2       -0.00030   0.00000  -0.00012   0.00000   0.00015
 267       10F+3        0.00000   0.00016   0.00000   0.00047   0.00000
 268       10F-3       -0.00025   0.00000   0.00001   0.00000  -0.00008
 269 13  F  1S          0.00000   0.00185   0.00000   0.00508   0.00000
 270        2S          0.00000  -0.00490   0.00000  -0.01363   0.00000
 271        3S          0.00000  -0.00132   0.00000  -0.00365   0.00000
 272        4S          0.00000  -0.00038   0.00000  -0.00462   0.00000
 273        5PX         0.00000  -0.01675   0.00000  -0.03901   0.00000
 274        5PY         0.05117   0.00000   0.00687   0.00000  -0.06653
 275        5PZ         0.00000   0.03608   0.00000   0.08633   0.00000
 276        6PX         0.00000  -0.02075   0.00000  -0.04795   0.00000
 277        6PY         0.06260   0.00000   0.00872   0.00000  -0.08268
 278        6PZ         0.00000   0.04423   0.00000   0.10689   0.00000
 279        7PX         0.00000  -0.01246   0.00000  -0.03168   0.00000
 280        7PY         0.05301   0.00000   0.00689   0.00000  -0.07111
 281        7PZ         0.00000   0.03441   0.00000   0.08055   0.00000
 282        8D 0        0.00000  -0.00012   0.00000  -0.00012   0.00000
 283        8D+1        0.00000   0.00036   0.00000   0.00073   0.00000
 284        8D-1        0.00003   0.00000  -0.00002   0.00000  -0.00019
 285        8D+2        0.00000  -0.00027   0.00000  -0.00040   0.00000
 286        8D-2        0.00025   0.00000  -0.00003   0.00000   0.00008
 287        9D 0        0.00000  -0.00068   0.00000  -0.00088   0.00000
 288        9D+1        0.00000   0.00110   0.00000   0.00234   0.00000
 289        9D-1       -0.00128   0.00000   0.00042   0.00000  -0.00071
 290        9D+2        0.00000  -0.00076   0.00000  -0.00191   0.00000
 291        9D-2        0.00163   0.00000   0.00025   0.00000  -0.00073
 292       10F 0        0.00000  -0.00001   0.00000  -0.00022   0.00000
 293       10F+1        0.00000  -0.00016   0.00000  -0.00026   0.00000
 294       10F-1        0.00007   0.00000  -0.00011   0.00000   0.00021
 295       10F+2        0.00000   0.00024   0.00000   0.00064   0.00000
 296       10F-2       -0.00030   0.00000   0.00012   0.00000  -0.00015
 297       10F+3        0.00000  -0.00016   0.00000  -0.00047   0.00000
 298       10F-3        0.00025   0.00000   0.00001   0.00000  -0.00008
                          31        32        33        34        35
                        (B1)--O   (A1)--V   (A2)--V   (A1)--V   (B2)--V
     Eigenvalues --    -0.36342   0.13562   0.15668   0.16538   0.16778
   1 1   C  1S          0.00000  -0.03976   0.00000   0.03143  -0.03493
   2        2S          0.00000   0.14431   0.00000  -0.08751   0.10832
   3        3S          0.00000   0.02066   0.00000  -0.00980   0.00784
   4        4S          0.00000   2.04854   0.00000  -1.25371   3.09098
   5        5PX        -0.05792   0.00000  -0.00611   0.00000   0.00000
   6        5PY         0.00000   0.02300   0.00000  -0.00899   0.05952
   7        5PZ         0.00000   0.01411   0.00000  -0.01080   0.01632
   8        6PX        -0.07616   0.00000  -0.03322   0.00000   0.00000
   9        6PY         0.00000   0.16652   0.00000  -0.02388   0.24832
  10        6PZ         0.00000   0.03087   0.00000  -0.00400   0.03745
  11        7PX        -0.08463   0.00000  -0.05633   0.00000   0.00000
  12        7PY         0.00000   0.37265   0.00000  -0.35235   0.25911
  13        7PZ         0.00000   0.24674   0.00000   0.29394   0.09018
  14        8D 0        0.00000   0.00099   0.00000   0.01191  -0.00395
  15        8D+1       -0.00618   0.00000   0.01306   0.00000   0.00000
  16        8D-1        0.00000   0.00190   0.00000   0.00036   0.00059
  17        8D+2        0.00000   0.00281   0.00000   0.00220   0.00338
  18        8D-2       -0.01056   0.00000   0.01044   0.00000   0.00000
  19        9D 0        0.00000  -0.07650   0.00000   0.00643  -0.11343
  20        9D+1       -0.01628   0.00000   0.00376   0.00000   0.00000
  21        9D-1        0.00000   0.01350   0.00000  -0.01440   0.01455
  22        9D+2        0.00000   0.03332   0.00000   0.00819   0.02473
  23        9D-2       -0.01767   0.00000  -0.00042   0.00000   0.00000
  24       10F 0        0.00000  -0.00411   0.00000   0.00384  -0.00379
  25       10F+1        0.00202   0.00000  -0.00285   0.00000   0.00000
  26       10F-1        0.00000  -0.01105   0.00000   0.00577  -0.01378
  27       10F+2        0.00000  -0.00065   0.00000  -0.00084  -0.00136
  28       10F-2        0.00246   0.00000  -0.00362   0.00000   0.00000
  29       10F+3       -0.00086   0.00000   0.00124   0.00000   0.00000
  30       10F-3        0.00000   0.01364   0.00000  -0.00543   0.01846
  31 2   H  1S         -0.04983   0.00147   0.03698  -0.01166   0.00925
  32        2S         -0.07877  -0.25368   0.10130   0.05113  -0.29236
  33        3S         -0.05751  -0.96054   0.32280   0.58597  -1.04340
  34        4PX         0.00224  -0.00741   0.00007   0.00654  -0.00876
  35        4PY         0.00207  -0.00367   0.00103   0.00154  -0.00251
  36        4PZ        -0.00048   0.00104   0.00103   0.00173   0.00024
  37        5PX         0.00059   0.12411  -0.01635  -0.05636   0.15126
  38        5PY         0.00196   0.08236  -0.00690  -0.01937   0.09143
  39        5PZ         0.00008   0.00712   0.01719  -0.00457   0.01265
  40        6D 0        0.00046   0.00593  -0.00080  -0.00134   0.00754
  41        6D+1        0.00019  -0.00128  -0.00082   0.00011  -0.00207
  42        6D-1        0.00036  -0.00140  -0.00150  -0.00016  -0.00126
  43        6D+2       -0.00023  -0.00273   0.00098   0.00174  -0.00407
  44        6D-2       -0.00064  -0.00732   0.00153   0.00229  -0.00860
  45 3   H  1S          0.04983   0.00147  -0.03698  -0.01166   0.00925
  46        2S          0.07877  -0.25368  -0.10130   0.05113  -0.29236
  47        3S          0.05751  -0.96054  -0.32280   0.58597  -1.04340
  48        4PX         0.00224   0.00741   0.00007  -0.00654   0.00876
  49        4PY        -0.00207  -0.00367  -0.00103   0.00154  -0.00251
  50        4PZ         0.00048   0.00104  -0.00103   0.00173   0.00024
  51        5PX         0.00059  -0.12411  -0.01635   0.05636  -0.15126
  52        5PY        -0.00196   0.08236   0.00690  -0.01937   0.09143
  53        5PZ        -0.00008   0.00712  -0.01719  -0.00457   0.01265
  54        6D 0       -0.00046   0.00593   0.00080  -0.00134   0.00754
  55        6D+1        0.00019   0.00128  -0.00082  -0.00011   0.00207
  56        6D-1       -0.00036  -0.00140   0.00150  -0.00016  -0.00126
  57        6D+2        0.00023  -0.00273  -0.00098   0.00174  -0.00407
  58        6D-2       -0.00064   0.00732   0.00153  -0.00229   0.00860
  59 4   H  1S          0.04983   0.00147   0.03698  -0.01166  -0.00925
  60        2S          0.07877  -0.25368   0.10130   0.05113   0.29236
  61        3S          0.05751  -0.96054   0.32280   0.58597   1.04340
  62        4PX         0.00224   0.00741  -0.00007  -0.00654  -0.00876
  63        4PY         0.00207   0.00367  -0.00103  -0.00154  -0.00251
  64        4PZ         0.00048   0.00104   0.00103   0.00173  -0.00024
  65        5PX         0.00059  -0.12411   0.01635   0.05636   0.15126
  66        5PY         0.00196  -0.08236   0.00690   0.01937   0.09143
  67        5PZ        -0.00008   0.00712   0.01719  -0.00457  -0.01265
  68        6D 0       -0.00046   0.00593  -0.00080  -0.00134  -0.00754
  69        6D+1        0.00019   0.00128   0.00082  -0.00011  -0.00207
  70        6D-1        0.00036   0.00140   0.00150   0.00016  -0.00126
  71        6D+2        0.00023  -0.00273   0.00098   0.00174   0.00407
  72        6D-2        0.00064  -0.00732   0.00153   0.00229   0.00860
  73 5   H  1S         -0.04983   0.00147  -0.03698  -0.01166  -0.00925
  74        2S         -0.07877  -0.25368  -0.10130   0.05113   0.29236
  75        3S         -0.05751  -0.96054  -0.32280   0.58597   1.04340
  76        4PX         0.00224  -0.00741  -0.00007   0.00654   0.00876
  77        4PY        -0.00207   0.00367   0.00103  -0.00154  -0.00251
  78        4PZ        -0.00048   0.00104  -0.00103   0.00173  -0.00024
  79        5PX         0.00059   0.12411   0.01635  -0.05636  -0.15126
  80        5PY        -0.00196  -0.08236  -0.00690   0.01937   0.09143
  81        5PZ         0.00008   0.00712  -0.01719  -0.00457  -0.01265
  82        6D 0        0.00046   0.00593   0.00080  -0.00134  -0.00754
  83        6D+1        0.00019  -0.00128   0.00082   0.00011   0.00207
  84        6D-1       -0.00036   0.00140  -0.00150   0.00016  -0.00126
  85        6D+2       -0.00023  -0.00273  -0.00098   0.00174   0.00407
  86        6D-2        0.00064   0.00732   0.00153  -0.00229  -0.00860
  87 6   C  1S          0.00000  -0.03976   0.00000   0.03143   0.03493
  88        2S          0.00000   0.14431   0.00000  -0.08751  -0.10832
  89        3S          0.00000   0.02066   0.00000  -0.00980  -0.00784
  90        4S          0.00000   2.04854   0.00000  -1.25371  -3.09098
  91        5PX        -0.05792   0.00000   0.00611   0.00000   0.00000
  92        5PY         0.00000  -0.02300   0.00000   0.00899   0.05952
  93        5PZ         0.00000   0.01411   0.00000  -0.01080  -0.01632
  94        6PX        -0.07616   0.00000   0.03322   0.00000   0.00000
  95        6PY         0.00000  -0.16652   0.00000   0.02388   0.24832
  96        6PZ         0.00000   0.03087   0.00000  -0.00400  -0.03745
  97        7PX        -0.08463   0.00000   0.05633   0.00000   0.00000
  98        7PY         0.00000  -0.37265   0.00000   0.35235   0.25911
  99        7PZ         0.00000   0.24674   0.00000   0.29394  -0.09018
 100        8D 0        0.00000   0.00099   0.00000   0.01191   0.00395
 101        8D+1       -0.00618   0.00000  -0.01306   0.00000   0.00000
 102        8D-1        0.00000  -0.00190   0.00000  -0.00036   0.00059
 103        8D+2        0.00000   0.00281   0.00000   0.00220  -0.00338
 104        8D-2        0.01056   0.00000   0.01044   0.00000   0.00000
 105        9D 0        0.00000  -0.07650   0.00000   0.00643   0.11343
 106        9D+1       -0.01628   0.00000  -0.00376   0.00000   0.00000
 107        9D-1        0.00000  -0.01350   0.00000   0.01440   0.01455
 108        9D+2        0.00000   0.03332   0.00000   0.00819  -0.02473
 109        9D-2        0.01767   0.00000  -0.00042   0.00000   0.00000
 110       10F 0        0.00000  -0.00411   0.00000   0.00384   0.00379
 111       10F+1        0.00202   0.00000   0.00285   0.00000   0.00000
 112       10F-1        0.00000   0.01105   0.00000  -0.00577  -0.01378
 113       10F+2        0.00000  -0.00065   0.00000  -0.00084   0.00136
 114       10F-2       -0.00246   0.00000  -0.00362   0.00000   0.00000
 115       10F+3       -0.00086   0.00000  -0.00124   0.00000   0.00000
 116       10F-3        0.00000  -0.01364   0.00000   0.00543   0.01846
 117 7   C  1S          0.00000  -0.01987   0.00000  -0.03301   0.00799
 118        2S          0.00000   0.08425   0.00000   0.08913  -0.04632
 119        3S          0.00000   0.02740   0.00000   0.01034  -0.01874
 120        4S          0.00000   0.72827   0.00000   1.68062   0.06683
 121        5PX         0.19307   0.00000   0.19352   0.00000   0.00000
 122        5PY         0.00000  -0.02264   0.00000  -0.04927   0.01173
 123        5PZ         0.00000  -0.04065   0.00000  -0.02054   0.03428
 124        6PX         0.26589   0.00000   0.24024   0.00000   0.00000
 125        6PY         0.00000  -0.02814   0.00000  -0.15360   0.08734
 126        6PZ         0.00000  -0.07701   0.00000  -0.09612   0.11645
 127        7PX         0.22932   0.00000   0.81192   0.00000   0.00000
 128        7PY         0.00000  -0.30103   0.00000  -0.62770   0.29186
 129        7PZ         0.00000  -0.51789   0.00000  -0.28904   1.34812
 130        8D 0        0.00000   0.00204   0.00000  -0.00061  -0.00451
 131        8D+1       -0.00160   0.00000  -0.00084   0.00000   0.00000
 132        8D-1        0.00000  -0.00500   0.00000   0.00223  -0.00698
 133        8D+2        0.00000  -0.00559   0.00000   0.00199   0.00113
 134        8D-2        0.01467   0.00000  -0.01565   0.00000   0.00000
 135        9D 0        0.00000   0.01375   0.00000   0.04850  -0.02861
 136        9D+1        0.00316   0.00000   0.01947   0.00000   0.00000
 137        9D-1        0.00000   0.02493   0.00000   0.04363  -0.00504
 138        9D+2        0.00000  -0.00378   0.00000  -0.04572  -0.00244
 139        9D-2        0.03104   0.00000  -0.01178   0.00000   0.00000
 140       10F 0        0.00000  -0.00039   0.00000  -0.00302   0.00247
 141       10F+1        0.00007   0.00000   0.00336   0.00000   0.00000
 142       10F-1        0.00000  -0.00071   0.00000  -0.01436   0.00124
 143       10F+2        0.00000   0.00215   0.00000   0.00370  -0.00296
 144       10F-2        0.00041   0.00000  -0.00210   0.00000   0.00000
 145       10F+3       -0.00655   0.00000  -0.00144   0.00000   0.00000
 146       10F-3        0.00000   0.00301   0.00000   0.00181  -0.00325
 147 8   H  1S          0.00000   0.00203   0.00000  -0.00483  -0.01839
 148        2S          0.00000  -0.06446   0.00000  -0.24861   0.14634
 149        3S          0.00000  -1.07890   0.00000  -1.34885   1.23560
 150        4PX         0.00490   0.00000   0.00840   0.00000   0.00000
 151        4PY         0.00000   0.00644   0.00000   0.00274  -0.00571
 152        4PZ         0.00000   0.01171   0.00000   0.01038  -0.00671
 153        5PX         0.01380   0.00000   0.02597   0.00000   0.00000
 154        5PY         0.00000  -0.03628   0.00000  -0.07850   0.06052
 155        5PZ         0.00000  -0.07548   0.00000  -0.13852   0.08149
 156        6D 0        0.00000  -0.00250   0.00000  -0.00674   0.00427
 157        6D+1        0.00170   0.00000   0.00416   0.00000   0.00000
 158        6D-1        0.00000  -0.00188   0.00000  -0.00764   0.00547
 159        6D+2        0.00000   0.00038   0.00000   0.00318  -0.00169
 160        6D-2        0.00159   0.00000   0.00159   0.00000   0.00000
 161 9   C  1S          0.00000  -0.01987   0.00000  -0.03301  -0.00799
 162        2S          0.00000   0.08425   0.00000   0.08913   0.04632
 163        3S          0.00000   0.02740   0.00000   0.01034   0.01874
 164        4S          0.00000   0.72827   0.00000   1.68062  -0.06683
 165        5PX         0.19307   0.00000  -0.19352   0.00000   0.00000
 166        5PY         0.00000   0.02264   0.00000   0.04927   0.01173
 167        5PZ         0.00000  -0.04065   0.00000  -0.02054  -0.03428
 168        6PX         0.26589   0.00000  -0.24024   0.00000   0.00000
 169        6PY         0.00000   0.02814   0.00000   0.15360   0.08734
 170        6PZ         0.00000  -0.07701   0.00000  -0.09612  -0.11645
 171        7PX         0.22932   0.00000  -0.81192   0.00000   0.00000
 172        7PY         0.00000   0.30103   0.00000   0.62770   0.29186
 173        7PZ         0.00000  -0.51789   0.00000  -0.28904  -1.34812
 174        8D 0        0.00000   0.00204   0.00000  -0.00061   0.00451
 175        8D+1       -0.00160   0.00000   0.00084   0.00000   0.00000
 176        8D-1        0.00000   0.00500   0.00000  -0.00223  -0.00698
 177        8D+2        0.00000  -0.00559   0.00000   0.00199  -0.00113
 178        8D-2       -0.01467   0.00000  -0.01565   0.00000   0.00000
 179        9D 0        0.00000   0.01375   0.00000   0.04850   0.02861
 180        9D+1        0.00316   0.00000  -0.01947   0.00000   0.00000
 181        9D-1        0.00000  -0.02493   0.00000  -0.04363  -0.00504
 182        9D+2        0.00000  -0.00378   0.00000  -0.04572   0.00244
 183        9D-2       -0.03104   0.00000  -0.01178   0.00000   0.00000
 184       10F 0        0.00000  -0.00039   0.00000  -0.00302  -0.00247
 185       10F+1        0.00007   0.00000  -0.00336   0.00000   0.00000
 186       10F-1        0.00000   0.00071   0.00000   0.01436   0.00124
 187       10F+2        0.00000   0.00215   0.00000   0.00370   0.00296
 188       10F-2       -0.00041   0.00000  -0.00210   0.00000   0.00000
 189       10F+3       -0.00655   0.00000   0.00144   0.00000   0.00000
 190       10F-3        0.00000  -0.00301   0.00000  -0.00181  -0.00325
 191 10  H  1S          0.00000   0.00203   0.00000  -0.00483   0.01839
 192        2S          0.00000  -0.06446   0.00000  -0.24861  -0.14634
 193        3S          0.00000  -1.07890   0.00000  -1.34885  -1.23560
 194        4PX         0.00490   0.00000  -0.00840   0.00000   0.00000
 195        4PY         0.00000  -0.00644   0.00000  -0.00274  -0.00571
 196        4PZ         0.00000   0.01171   0.00000   0.01038   0.00671
 197        5PX         0.01380   0.00000  -0.02597   0.00000   0.00000
 198        5PY         0.00000   0.03628   0.00000   0.07850   0.06052
 199        5PZ         0.00000  -0.07548   0.00000  -0.13852  -0.08149
 200        6D 0        0.00000  -0.00250   0.00000  -0.00674  -0.00427
 201        6D+1        0.00170   0.00000  -0.00416   0.00000   0.00000
 202        6D-1        0.00000   0.00188   0.00000   0.00764   0.00547
 203        6D+2        0.00000   0.00038   0.00000   0.00318   0.00169
 204        6D-2       -0.00159   0.00000   0.00159   0.00000   0.00000
 205 11  Si 1S          0.00000  -0.00237   0.00000   0.00816   0.00000
 206        2S          0.00000   0.00279   0.00000  -0.06059   0.00000
 207        3S          0.00000  -0.03389   0.00000   0.00901   0.00000
 208        4S          0.00000   0.01970   0.00000  -0.02644   0.00000
 209        5S          0.00000  -0.36541   0.00000   0.35697   0.00000
 210        6PX         0.00188   0.00000   0.00000   0.00000   0.00000
 211        6PY         0.00000   0.00000   0.00000   0.00000   0.00183
 212        6PZ         0.00000  -0.00505   0.00000  -0.03623   0.00000
 213        7PX        -0.01052   0.00000   0.00000   0.00000   0.00000
 214        7PY         0.00000   0.00000   0.00000   0.00000  -0.14897
 215        7PZ         0.00000   0.07103   0.00000   0.07442   0.00000
 216        8PX        -0.00009   0.00000   0.00000   0.00000   0.00000
 217        8PY         0.00000   0.00000   0.00000   0.00000   0.01377
 218        8PZ         0.00000  -0.00431   0.00000   0.01155   0.00000
 219        9PX         0.01859   0.00000   0.00000   0.00000   0.00000
 220        9PY         0.00000   0.00000   0.00000   0.00000  -0.64002
 221        9PZ         0.00000  -0.07127   0.00000   0.54699   0.00000
 222       10D 0        0.00000   0.07535   0.00000  -0.04172   0.00000
 223       10D+1       -0.01987   0.00000   0.00000   0.00000   0.00000
 224       10D-1        0.00000   0.00000   0.00000   0.00000   0.17983
 225       10D+2        0.00000   0.07005   0.00000  -0.00826   0.00000
 226       10D-2        0.00000   0.00000   0.03687   0.00000   0.00000
 227       11D 0        0.00000  -0.01884   0.00000  -0.02290   0.00000
 228       11D+1        0.00335   0.00000   0.00000   0.00000   0.00000
 229       11D-1        0.00000   0.00000   0.00000   0.00000   0.00197
 230       11D+2        0.00000  -0.02607   0.00000  -0.02868   0.00000
 231       11D-2        0.00000   0.00000   0.00169   0.00000   0.00000
 232       12F 0        0.00000  -0.01129   0.00000   0.00459   0.00000
 233       12F+1        0.00520   0.00000   0.00000   0.00000   0.00000
 234       12F-1        0.00000   0.00000   0.00000   0.00000  -0.01513
 235       12F+2        0.00000   0.00895   0.00000   0.00641   0.00000
 236       12F-2        0.00000   0.00000   0.00100   0.00000   0.00000
 237       12F+3        0.00303   0.00000   0.00000   0.00000   0.00000
 238       12F-3        0.00000   0.00000   0.00000   0.00000  -0.00474
 239 12  F  1S         -0.00140  -0.01003   0.00000   0.02994   0.00000
 240        2S          0.00240   0.01762   0.00000  -0.04708   0.00000
 241        3S          0.00094   0.00777   0.00000  -0.02220   0.00000
 242        4S          0.01200   0.07030   0.00000  -0.28585   0.00000
 243        5PX        -0.00077   0.00360   0.00000   0.03502   0.00000
 244        5PY         0.00000   0.00000  -0.00927   0.00000   0.02727
 245        5PZ        -0.00600  -0.01007   0.00000   0.00567   0.00000
 246        6PX        -0.00031   0.00701   0.00000   0.03998   0.00000
 247        6PY         0.00000   0.00000  -0.01239   0.00000   0.02868
 248        6PZ        -0.00775  -0.01271   0.00000   0.01146   0.00000
 249        7PX        -0.00445  -0.00136   0.00000   0.10360   0.00000
 250        7PY         0.00000   0.00000  -0.01636   0.00000   0.06360
 251        7PZ        -0.00915  -0.01607   0.00000   0.02053   0.00000
 252        8D 0       -0.00006   0.00000   0.00000  -0.00031   0.00000
 253        8D+1       -0.00004   0.00010   0.00000  -0.00013   0.00000
 254        8D-1        0.00000   0.00000  -0.00024   0.00000   0.00051
 255        8D+2        0.00012   0.00025   0.00000   0.00003   0.00000
 256        8D-2        0.00000   0.00000  -0.00012   0.00000   0.00005
 257        9D 0        0.00069  -0.00038   0.00000  -0.00224   0.00000
 258        9D+1        0.00055   0.00240   0.00000  -0.00342   0.00000
 259        9D-1        0.00000   0.00000   0.00004   0.00000  -0.00168
 260        9D+2       -0.00011  -0.00011   0.00000  -0.00432   0.00000
 261        9D-2        0.00000   0.00000   0.00115   0.00000  -0.00212
 262       10F 0       -0.00004   0.00014   0.00000  -0.00003   0.00000
 263       10F+1       -0.00010  -0.00017   0.00000   0.00025   0.00000
 264       10F-1        0.00000   0.00000  -0.00000   0.00000   0.00009
 265       10F+2       -0.00004  -0.00022   0.00000   0.00041   0.00000
 266       10F-2        0.00000   0.00000  -0.00007   0.00000   0.00037
 267       10F+3        0.00003  -0.00006   0.00000   0.00040   0.00000
 268       10F-3        0.00000   0.00000  -0.00009   0.00000   0.00030
 269 13  F  1S          0.00140  -0.01003   0.00000   0.02994   0.00000
 270        2S         -0.00240   0.01762   0.00000  -0.04708   0.00000
 271        3S         -0.00094   0.00777   0.00000  -0.02220   0.00000
 272        4S         -0.01200   0.07030   0.00000  -0.28585   0.00000
 273        5PX        -0.00077  -0.00360   0.00000  -0.03502   0.00000
 274        5PY         0.00000   0.00000   0.00927   0.00000   0.02727
 275        5PZ         0.00600  -0.01007   0.00000   0.00567   0.00000
 276        6PX        -0.00031  -0.00701   0.00000  -0.03998   0.00000
 277        6PY         0.00000   0.00000   0.01239   0.00000   0.02868
 278        6PZ         0.00775  -0.01271   0.00000   0.01146   0.00000
 279        7PX        -0.00445   0.00136   0.00000  -0.10360   0.00000
 280        7PY         0.00000   0.00000   0.01636   0.00000   0.06360
 281        7PZ         0.00915  -0.01607   0.00000   0.02053   0.00000
 282        8D 0        0.00006   0.00000   0.00000  -0.00031   0.00000
 283        8D+1       -0.00004  -0.00010   0.00000   0.00013   0.00000
 284        8D-1        0.00000   0.00000   0.00024   0.00000   0.00051
 285        8D+2       -0.00012   0.00025   0.00000   0.00003   0.00000
 286        8D-2        0.00000   0.00000  -0.00012   0.00000  -0.00005
 287        9D 0       -0.00069  -0.00038   0.00000  -0.00224   0.00000
 288        9D+1        0.00055  -0.00240   0.00000   0.00342   0.00000
 289        9D-1        0.00000   0.00000  -0.00004   0.00000  -0.00168
 290        9D+2        0.00011  -0.00011   0.00000  -0.00432   0.00000
 291        9D-2        0.00000   0.00000   0.00115   0.00000   0.00212
 292       10F 0        0.00004   0.00014   0.00000  -0.00003   0.00000
 293       10F+1       -0.00010   0.00017   0.00000  -0.00025   0.00000
 294       10F-1        0.00000   0.00000   0.00000   0.00000   0.00009
 295       10F+2        0.00004  -0.00022   0.00000   0.00041   0.00000
 296       10F-2        0.00000   0.00000  -0.00007   0.00000  -0.00037
 297       10F+3        0.00003   0.00006   0.00000  -0.00040   0.00000
 298       10F-3        0.00000   0.00000   0.00009   0.00000   0.00030
                          36        37        38        39        40
                        (B1)--V   (B2)--V   (A1)--V   (B1)--V   (A2)--V
     Eigenvalues --     0.18201   0.19982   0.20186   0.20206   0.21196
   1 1   C  1S          0.00000  -0.03009  -0.00920   0.00000   0.00000
   2        2S          0.00000   0.07296   0.02441   0.00000   0.00000
   3        3S          0.00000   0.00466  -0.00503   0.00000   0.00000
   4        4S          0.00000   1.12159   1.27341   0.00000   0.00000
   5        5PX        -0.05679   0.00000   0.00000  -0.05959  -0.08918
   6        5PY         0.00000  -0.00497   0.01612   0.00000   0.00000
   7        5PZ         0.00000   0.00411  -0.00578   0.00000   0.00000
   8        6PX        -0.24782   0.00000   0.00000  -0.22828  -0.36326
   9        6PY         0.00000  -0.02754   0.09598   0.00000   0.00000
  10        6PZ         0.00000  -0.00714   0.06779   0.00000   0.00000
  11        7PX        -1.34604   0.00000   0.00000  -1.41225  -1.90050
  12        7PY         0.00000  -0.15812   0.14351   0.00000   0.00000
  13        7PZ         0.00000   0.22516   0.67551   0.00000   0.00000
  14        8D 0        0.00000  -0.00668   0.00635   0.00000   0.00000
  15        8D+1       -0.00555   0.00000   0.00000   0.00641  -0.00344
  16        8D-1        0.00000   0.00015   0.00880   0.00000   0.00000
  17        8D+2        0.00000   0.00022   0.00007   0.00000   0.00000
  18        8D-2        0.00588   0.00000   0.00000  -0.01809  -0.00666
  19        9D 0        0.00000   0.01392  -0.06136   0.00000   0.00000
  20        9D+1       -0.00706   0.00000   0.00000  -0.01407  -0.02746
  21        9D-1        0.00000  -0.03230  -0.06134   0.00000   0.00000
  22        9D+2        0.00000  -0.02332  -0.00651   0.00000   0.00000
  23        9D-2       -0.09090   0.00000   0.00000  -0.10460  -0.17117
  24       10F 0        0.00000  -0.00510   0.00064   0.00000   0.00000
  25       10F+1        0.00589   0.00000   0.00000   0.00316   0.00930
  26       10F-1        0.00000  -0.00525  -0.00327   0.00000   0.00000
  27       10F+2        0.00000  -0.00172  -0.00244   0.00000   0.00000
  28       10F-2       -0.00051   0.00000   0.00000  -0.00384  -0.00233
  29       10F+3        0.00330   0.00000   0.00000  -0.00122   0.00289
  30       10F-3        0.00000   0.00538   0.01164   0.00000   0.00000
  31 2   H  1S          0.02356   0.00418  -0.00726  -0.03973  -0.00767
  32        2S          0.31658  -0.05172  -0.22803   0.16592   0.32626
  33        3S          1.43523  -0.20293  -0.31299   1.05073   1.92125
  34        4PX         0.00259  -0.00224  -0.00223   0.00358   0.00488
  35        4PY         0.00887  -0.00121   0.00280   0.00907   0.01320
  36        4PZ         0.00139  -0.00217   0.00389   0.00290   0.00167
  37        5PX        -0.09356   0.02486   0.06743  -0.06895  -0.13127
  38        5PY        -0.09768   0.01227   0.03363  -0.11435  -0.14966
  39        5PZ        -0.03209   0.00485   0.00117  -0.00548  -0.02732
  40        6D 0       -0.00312   0.00053   0.00459  -0.00380  -0.00546
  41        6D+1        0.00194  -0.00051  -0.00188  -0.00006   0.00189
  42        6D-1        0.00231  -0.00144  -0.00060   0.00005   0.00148
  43        6D+2        0.00207  -0.00138  -0.00199  -0.00059   0.00223
  44        6D-2        0.00858  -0.00150  -0.00353   0.00654   0.01107
  45 3   H  1S         -0.02356   0.00418  -0.00726   0.03973   0.00767
  46        2S         -0.31658  -0.05172  -0.22803  -0.16592  -0.32626
  47        3S         -1.43523  -0.20293  -0.31299  -1.05073  -1.92125
  48        4PX         0.00259   0.00224   0.00223   0.00358   0.00488
  49        4PY        -0.00887  -0.00121   0.00280  -0.00907  -0.01320
  50        4PZ        -0.00139  -0.00217   0.00389  -0.00290  -0.00167
  51        5PX        -0.09356  -0.02486  -0.06743  -0.06895  -0.13127
  52        5PY         0.09768   0.01227   0.03363   0.11435   0.14966
  53        5PZ         0.03209   0.00485   0.00117   0.00548   0.02732
  54        6D 0        0.00312   0.00053   0.00459   0.00380   0.00546
  55        6D+1        0.00194   0.00051   0.00188  -0.00006   0.00189
  56        6D-1       -0.00231  -0.00144  -0.00060  -0.00005  -0.00148
  57        6D+2       -0.00207  -0.00138  -0.00199   0.00059  -0.00223
  58        6D-2        0.00858   0.00150   0.00353   0.00654   0.01107
  59 4   H  1S         -0.02356  -0.00418  -0.00726   0.03973  -0.00767
  60        2S         -0.31658   0.05172  -0.22803  -0.16592   0.32626
  61        3S         -1.43523   0.20293  -0.31299  -1.05073   1.92125
  62        4PX         0.00259  -0.00224   0.00223   0.00358  -0.00488
  63        4PY         0.00887  -0.00121  -0.00280   0.00907  -0.01320
  64        4PZ        -0.00139   0.00217   0.00389  -0.00290   0.00167
  65        5PX        -0.09356   0.02486  -0.06743  -0.06895   0.13127
  66        5PY        -0.09768   0.01227  -0.03363  -0.11435   0.14966
  67        5PZ         0.03209  -0.00485   0.00117   0.00548  -0.02732
  68        6D 0        0.00312  -0.00053   0.00459   0.00380  -0.00546
  69        6D+1        0.00194  -0.00051   0.00188  -0.00006  -0.00189
  70        6D-1        0.00231  -0.00144   0.00060   0.00005  -0.00148
  71        6D+2       -0.00207   0.00138  -0.00199   0.00059   0.00223
  72        6D-2       -0.00858   0.00150  -0.00353  -0.00654   0.01107
  73 5   H  1S          0.02356  -0.00418  -0.00726  -0.03973   0.00767
  74        2S          0.31658   0.05172  -0.22803   0.16592  -0.32626
  75        3S          1.43523   0.20293  -0.31299   1.05073  -1.92125
  76        4PX         0.00259   0.00224  -0.00223   0.00358  -0.00488
  77        4PY        -0.00887  -0.00121  -0.00280  -0.00907   0.01320
  78        4PZ         0.00139   0.00217   0.00389   0.00290  -0.00167
  79        5PX        -0.09356  -0.02486   0.06743  -0.06895   0.13127
  80        5PY         0.09768   0.01227  -0.03363   0.11435  -0.14966
  81        5PZ        -0.03209  -0.00485   0.00117  -0.00548   0.02732
  82        6D 0       -0.00312  -0.00053   0.00459  -0.00380   0.00546
  83        6D+1        0.00194   0.00051  -0.00188  -0.00006  -0.00189
  84        6D-1       -0.00231  -0.00144   0.00060  -0.00005   0.00148
  85        6D+2        0.00207   0.00138  -0.00199  -0.00059  -0.00223
  86        6D-2       -0.00858  -0.00150   0.00353  -0.00654   0.01107
  87 6   C  1S          0.00000   0.03009  -0.00920   0.00000   0.00000
  88        2S          0.00000  -0.07296   0.02441   0.00000   0.00000
  89        3S          0.00000  -0.00466  -0.00503   0.00000   0.00000
  90        4S          0.00000  -1.12159   1.27341   0.00000   0.00000
  91        5PX        -0.05679   0.00000   0.00000  -0.05959   0.08918
  92        5PY         0.00000  -0.00497  -0.01612   0.00000   0.00000
  93        5PZ         0.00000  -0.00411  -0.00578   0.00000   0.00000
  94        6PX        -0.24782   0.00000   0.00000  -0.22828   0.36326
  95        6PY         0.00000  -0.02754  -0.09598   0.00000   0.00000
  96        6PZ         0.00000   0.00714   0.06779   0.00000   0.00000
  97        7PX        -1.34604   0.00000   0.00000  -1.41225   1.90050
  98        7PY         0.00000  -0.15812  -0.14351   0.00000   0.00000
  99        7PZ         0.00000  -0.22516   0.67551   0.00000   0.00000
 100        8D 0        0.00000   0.00668   0.00635   0.00000   0.00000
 101        8D+1       -0.00555   0.00000   0.00000   0.00641   0.00344
 102        8D-1        0.00000   0.00015  -0.00880   0.00000   0.00000
 103        8D+2        0.00000  -0.00022   0.00007   0.00000   0.00000
 104        8D-2       -0.00588   0.00000   0.00000   0.01809  -0.00666
 105        9D 0        0.00000  -0.01392  -0.06136   0.00000   0.00000
 106        9D+1       -0.00706   0.00000   0.00000  -0.01407   0.02746
 107        9D-1        0.00000  -0.03230   0.06134   0.00000   0.00000
 108        9D+2        0.00000   0.02332  -0.00651   0.00000   0.00000
 109        9D-2        0.09090   0.00000   0.00000   0.10460  -0.17117
 110       10F 0        0.00000   0.00510   0.00064   0.00000   0.00000
 111       10F+1        0.00589   0.00000   0.00000   0.00316  -0.00930
 112       10F-1        0.00000  -0.00525   0.00327   0.00000   0.00000
 113       10F+2        0.00000   0.00172  -0.00244   0.00000   0.00000
 114       10F-2        0.00051   0.00000   0.00000   0.00384  -0.00233
 115       10F+3        0.00330   0.00000   0.00000  -0.00122  -0.00289
 116       10F-3        0.00000   0.00538  -0.01164   0.00000   0.00000
 117 7   C  1S          0.00000  -0.04147  -0.01389   0.00000   0.00000
 118        2S          0.00000   0.14251   0.00419   0.00000   0.00000
 119        3S          0.00000   0.01670  -0.00883   0.00000   0.00000
 120        4S          0.00000   2.36295  -0.05998   0.00000   0.00000
 121        5PX         0.01444   0.00000   0.00000  -0.02891  -0.02231
 122        5PY         0.00000  -0.03098   0.01228   0.00000   0.00000
 123        5PZ         0.00000  -0.02909   0.06768   0.00000   0.00000
 124        6PX         0.01750   0.00000   0.00000  -0.04952  -0.01369
 125        6PY         0.00000  -0.08834  -0.01062   0.00000   0.00000
 126        6PZ         0.00000  -0.09428   0.15820   0.00000   0.00000
 127        7PX         0.26694   0.00000   0.00000   0.19790  -0.65256
 128        7PY         0.00000  -0.04214   0.29928   0.00000   0.00000
 129        7PZ         0.00000  -1.33592   0.94627   0.00000   0.00000
 130        8D 0        0.00000   0.00082  -0.00318   0.00000   0.00000
 131        8D+1       -0.01062   0.00000   0.00000  -0.00639   0.01009
 132        8D-1        0.00000   0.01046  -0.00068   0.00000   0.00000
 133        8D+2        0.00000   0.00417  -0.00095   0.00000   0.00000
 134        8D-2        0.00470   0.00000   0.00000   0.00474   0.00183
 135        9D 0        0.00000   0.08472   0.01101   0.00000   0.00000
 136        9D+1        0.00885   0.00000   0.00000   0.04045  -0.03482
 137        9D-1        0.00000  -0.03588  -0.05269   0.00000   0.00000
 138        9D+2        0.00000  -0.06402  -0.03132   0.00000   0.00000
 139        9D-2       -0.03460   0.00000   0.00000  -0.02381   0.00405
 140       10F 0        0.00000  -0.00413   0.00345   0.00000   0.00000
 141       10F+1       -0.00284   0.00000   0.00000   0.00019   0.00315
 142       10F-1        0.00000  -0.00710  -0.00435   0.00000   0.00000
 143       10F+2        0.00000   0.00565  -0.00749   0.00000   0.00000
 144       10F-2       -0.00518   0.00000   0.00000  -0.00221   0.00085
 145       10F+3       -0.00330   0.00000   0.00000  -0.00007   0.00363
 146       10F-3        0.00000  -0.00114  -0.00270   0.00000   0.00000
 147 8   H  1S          0.00000   0.00306  -0.00496   0.00000   0.00000
 148        2S          0.00000  -0.28778   0.10955   0.00000   0.00000
 149        3S          0.00000  -2.16032   1.26294   0.00000   0.00000
 150        4PX         0.00234   0.00000   0.00000   0.00307  -0.00583
 151        4PY         0.00000   0.01099  -0.00709   0.00000   0.00000
 152        4PZ         0.00000   0.01321  -0.00885   0.00000   0.00000
 153        5PX         0.00801   0.00000   0.00000  -0.01558   0.00329
 154        5PY         0.00000  -0.12441   0.04438   0.00000   0.00000
 155        5PZ         0.00000  -0.13088   0.07633   0.00000   0.00000
 156        6D 0        0.00000  -0.00347   0.00317   0.00000   0.00000
 157        6D+1        0.00098   0.00000   0.00000   0.00045  -0.00236
 158        6D-1        0.00000  -0.00834   0.00281   0.00000   0.00000
 159        6D+2        0.00000   0.00529  -0.00071   0.00000   0.00000
 160        6D-2        0.00162   0.00000   0.00000   0.00111  -0.00197
 161 9   C  1S          0.00000   0.04147  -0.01389   0.00000   0.00000
 162        2S          0.00000  -0.14251   0.00419   0.00000   0.00000
 163        3S          0.00000  -0.01670  -0.00883   0.00000   0.00000
 164        4S          0.00000  -2.36295  -0.05998   0.00000   0.00000
 165        5PX         0.01444   0.00000   0.00000  -0.02891   0.02231
 166        5PY         0.00000  -0.03098  -0.01228   0.00000   0.00000
 167        5PZ         0.00000   0.02909   0.06768   0.00000   0.00000
 168        6PX         0.01750   0.00000   0.00000  -0.04952   0.01369
 169        6PY         0.00000  -0.08834   0.01062   0.00000   0.00000
 170        6PZ         0.00000   0.09428   0.15820   0.00000   0.00000
 171        7PX         0.26694   0.00000   0.00000   0.19790   0.65256
 172        7PY         0.00000  -0.04214  -0.29928   0.00000   0.00000
 173        7PZ         0.00000   1.33592   0.94627   0.00000   0.00000
 174        8D 0        0.00000  -0.00082  -0.00318   0.00000   0.00000
 175        8D+1       -0.01062   0.00000   0.00000  -0.00639  -0.01009
 176        8D-1        0.00000   0.01046   0.00068   0.00000   0.00000
 177        8D+2        0.00000  -0.00417  -0.00095   0.00000   0.00000
 178        8D-2       -0.00470   0.00000   0.00000  -0.00474   0.00183
 179        9D 0        0.00000  -0.08472   0.01101   0.00000   0.00000
 180        9D+1        0.00885   0.00000   0.00000   0.04045   0.03482
 181        9D-1        0.00000  -0.03588   0.05269   0.00000   0.00000
 182        9D+2        0.00000   0.06402  -0.03132   0.00000   0.00000
 183        9D-2        0.03460   0.00000   0.00000   0.02381   0.00405
 184       10F 0        0.00000   0.00413   0.00345   0.00000   0.00000
 185       10F+1       -0.00284   0.00000   0.00000   0.00019  -0.00315
 186       10F-1        0.00000  -0.00710   0.00435   0.00000   0.00000
 187       10F+2        0.00000  -0.00565  -0.00749   0.00000   0.00000
 188       10F-2        0.00518   0.00000   0.00000   0.00221   0.00085
 189       10F+3       -0.00330   0.00000   0.00000  -0.00007  -0.00363
 190       10F-3        0.00000  -0.00114   0.00270   0.00000   0.00000
 191 10  H  1S          0.00000  -0.00306  -0.00496   0.00000   0.00000
 192        2S          0.00000   0.28778   0.10955   0.00000   0.00000
 193        3S          0.00000   2.16032   1.26294   0.00000   0.00000
 194        4PX         0.00234   0.00000   0.00000   0.00307   0.00583
 195        4PY         0.00000   0.01099   0.00709   0.00000   0.00000
 196        4PZ         0.00000  -0.01321  -0.00885   0.00000   0.00000
 197        5PX         0.00801   0.00000   0.00000  -0.01558  -0.00329
 198        5PY         0.00000  -0.12441  -0.04438   0.00000   0.00000
 199        5PZ         0.00000   0.13088   0.07633   0.00000   0.00000
 200        6D 0        0.00000   0.00347   0.00317   0.00000   0.00000
 201        6D+1        0.00098   0.00000   0.00000   0.00045   0.00236
 202        6D-1        0.00000  -0.00834  -0.00281   0.00000   0.00000
 203        6D+2        0.00000  -0.00529  -0.00071   0.00000   0.00000
 204        6D-2       -0.00162   0.00000   0.00000  -0.00111  -0.00197
 205 11  Si 1S          0.00000   0.00000   0.00375   0.00000   0.00000
 206        2S          0.00000   0.00000  -0.00501   0.00000   0.00000
 207        3S          0.00000   0.00000   0.07165   0.00000   0.00000
 208        4S          0.00000   0.00000   0.10951   0.00000   0.00000
 209        5S          0.00000   0.00000  -1.92429   0.00000   0.00000
 210        6PX         0.08613   0.00000   0.00000  -0.07553   0.00000
 211        6PY         0.00000   0.00716   0.00000   0.00000   0.00000
 212        6PZ         0.00000   0.00000  -0.05846   0.00000   0.00000
 213        7PX        -0.18143   0.00000   0.00000   0.04173   0.00000
 214        7PY         0.00000  -0.08496   0.00000   0.00000   0.00000
 215        7PZ         0.00000   0.00000   0.13729   0.00000   0.00000
 216        8PX        -0.03233   0.00000   0.00000   0.03403   0.00000
 217        8PY         0.00000   0.00684   0.00000   0.00000   0.00000
 218        8PZ         0.00000   0.00000   0.01196   0.00000   0.00000
 219        9PX        -0.17779   0.00000   0.00000   1.44908   0.00000
 220        9PY         0.00000  -1.34939   0.00000   0.00000   0.00000
 221        9PZ         0.00000   0.00000   2.19954   0.00000   0.00000
 222       10D 0        0.00000   0.00000  -0.28112   0.00000   0.00000
 223       10D+1       -0.01931   0.00000   0.00000  -0.43996   0.00000
 224       10D-1        0.00000   0.29909   0.00000   0.00000   0.00000
 225       10D+2        0.00000   0.00000   0.19091   0.00000   0.00000
 226       10D-2        0.00000   0.00000   0.00000   0.00000   0.19158
 227       11D 0        0.00000   0.00000   0.00623   0.00000   0.00000
 228       11D+1        0.09439   0.00000   0.00000  -0.03981   0.00000
 229       11D-1        0.00000  -0.04117   0.00000   0.00000   0.00000
 230       11D+2        0.00000   0.00000  -0.06811   0.00000   0.00000
 231       11D-2        0.00000   0.00000   0.00000   0.00000  -0.04230
 232       12F 0        0.00000   0.00000  -0.01664   0.00000   0.00000
 233       12F+1       -0.01644   0.00000   0.00000  -0.01615   0.00000
 234       12F-1        0.00000  -0.02679   0.00000   0.00000   0.00000
 235       12F+2        0.00000   0.00000  -0.05328   0.00000   0.00000
 236       12F-2        0.00000   0.00000   0.00000   0.00000  -0.01045
 237       12F+3       -0.00852   0.00000   0.00000  -0.04332   0.00000
 238       12F-3        0.00000   0.02568   0.00000   0.00000   0.00000
 239 12  F  1S         -0.01367   0.00000   0.02460   0.03134   0.00000
 240        2S          0.03192   0.00000  -0.03822  -0.05797   0.00000
 241        3S          0.01200   0.00000  -0.01921  -0.02670   0.00000
 242        4S          0.12079   0.00000  -0.24306  -0.18953   0.00000
 243        5PX        -0.00792   0.00000   0.05226  -0.01892   0.00000
 244        5PY         0.00000   0.04524   0.00000   0.00000  -0.00507
 245        5PZ        -0.04711   0.00000  -0.03754   0.05156   0.00000
 246        6PX        -0.01109   0.00000   0.05974  -0.01576   0.00000
 247        6PY         0.00000   0.04296   0.00000   0.00000  -0.00554
 248        6PZ        -0.05821   0.00000  -0.03366   0.05504   0.00000
 249        7PX        -0.02413   0.00000   0.06629  -0.13101   0.00000
 250        7PY         0.00000   0.10733   0.00000   0.00000  -0.03054
 251        7PZ        -0.07471   0.00000  -0.10017   0.08691   0.00000
 252        8D 0       -0.00060   0.00000  -0.00014   0.00112   0.00000
 253        8D+1        0.00022   0.00000  -0.00079  -0.00142   0.00000
 254        8D-1        0.00000   0.00024   0.00000   0.00000  -0.00004
 255        8D+2        0.00054   0.00000  -0.00099  -0.00131   0.00000
 256        8D-2        0.00000  -0.00013   0.00000   0.00000   0.00009
 257        9D 0       -0.00559   0.00000  -0.00530  -0.00083   0.00000
 258        9D+1       -0.00241   0.00000   0.00434   0.00533   0.00000
 259        9D-1        0.00000  -0.00071   0.00000   0.00000   0.00229
 260        9D+2       -0.00065   0.00000   0.00232   0.00363   0.00000
 261        9D-2        0.00000   0.00268   0.00000   0.00000   0.00218
 262       10F 0        0.00007   0.00000   0.00006  -0.00003   0.00000
 263       10F+1        0.00030   0.00000  -0.00035   0.00001   0.00000
 264       10F-1        0.00000   0.00008   0.00000   0.00000  -0.00011
 265       10F+2        0.00031   0.00000  -0.00004  -0.00016   0.00000
 266       10F-2        0.00000   0.00020   0.00000   0.00000   0.00003
 267       10F+3        0.00015   0.00000   0.00026  -0.00020   0.00000
 268       10F-3        0.00000   0.00021   0.00000   0.00000   0.00012
 269 13  F  1S          0.01367   0.00000   0.02460  -0.03134   0.00000
 270        2S         -0.03192   0.00000  -0.03822   0.05797   0.00000
 271        3S         -0.01200   0.00000  -0.01921   0.02670   0.00000
 272        4S         -0.12079   0.00000  -0.24306   0.18953   0.00000
 273        5PX        -0.00792   0.00000  -0.05226  -0.01892   0.00000
 274        5PY         0.00000   0.04524   0.00000   0.00000   0.00507
 275        5PZ         0.04711   0.00000  -0.03754  -0.05156   0.00000
 276        6PX        -0.01109   0.00000  -0.05974  -0.01576   0.00000
 277        6PY         0.00000   0.04296   0.00000   0.00000   0.00554
 278        6PZ         0.05821   0.00000  -0.03366  -0.05504   0.00000
 279        7PX        -0.02413   0.00000  -0.06629  -0.13101   0.00000
 280        7PY         0.00000   0.10733   0.00000   0.00000   0.03054
 281        7PZ         0.07471   0.00000  -0.10017  -0.08691   0.00000
 282        8D 0        0.00060   0.00000  -0.00014  -0.00112   0.00000
 283        8D+1        0.00022   0.00000   0.00079  -0.00142   0.00000
 284        8D-1        0.00000   0.00024   0.00000   0.00000   0.00004
 285        8D+2       -0.00054   0.00000  -0.00099   0.00131   0.00000
 286        8D-2        0.00000   0.00013   0.00000   0.00000   0.00009
 287        9D 0        0.00559   0.00000  -0.00530   0.00083   0.00000
 288        9D+1       -0.00241   0.00000  -0.00434   0.00533   0.00000
 289        9D-1        0.00000  -0.00071   0.00000   0.00000  -0.00229
 290        9D+2        0.00065   0.00000   0.00232  -0.00363   0.00000
 291        9D-2        0.00000  -0.00268   0.00000   0.00000   0.00218
 292       10F 0       -0.00007   0.00000   0.00006   0.00003   0.00000
 293       10F+1        0.00030   0.00000   0.00035   0.00001   0.00000
 294       10F-1        0.00000   0.00008   0.00000   0.00000   0.00011
 295       10F+2       -0.00031   0.00000  -0.00004   0.00016   0.00000
 296       10F-2        0.00000  -0.00020   0.00000   0.00000   0.00003
 297       10F+3        0.00015   0.00000  -0.00026  -0.00020   0.00000
 298       10F-3        0.00000   0.00021   0.00000   0.00000  -0.00012
                          41        42        43        44        45
                        (B2)--V   (A1)--V   (A1)--V   (B2)--V   (A1)--V
     Eigenvalues --     0.24780   0.29721   0.31860   0.34183   0.34336
   1 1   C  1S          0.00291  -0.00101   0.01670   0.02686   0.03821
   2        2S          0.04019  -0.01368  -0.00730  -0.06027  -0.06979
   3        3S          0.03317   0.00595   0.04767  -0.04225  -0.03183
   4        4S         -2.10443   0.19748  -3.82368   2.14269  -0.11900
   5        5PX         0.00000   0.00000   0.00000   0.00000   0.00000
   6        5PY         0.04560   0.06468   0.02571   0.03234   0.05489
   7        5PZ        -0.04281  -0.05852   0.07089  -0.01571  -0.03123
   8        6PX         0.00000   0.00000   0.00000   0.00000   0.00000
   9        6PY         0.10709   0.11387   0.00476   0.02023   0.10264
  10        6PZ         0.00424  -0.17255   0.04155  -0.00671   0.14630
  11        7PX         0.00000   0.00000   0.00000   0.00000   0.00000
  12        7PY         1.98112   0.38252   1.68750  -0.76531   1.17992
  13        7PZ        -0.15969  -1.60921   0.65391   0.15252  -0.32597
  14        8D 0        0.00632  -0.00179   0.02063   0.01153  -0.00457
  15        8D+1        0.00000   0.00000   0.00000   0.00000   0.00000
  16        8D-1        0.00068  -0.01639   0.00455  -0.01368  -0.01943
  17        8D+2       -0.00719   0.00776  -0.00298  -0.00511  -0.01202
  18        8D-2        0.00000   0.00000   0.00000   0.00000   0.00000
  19        9D 0        0.01512   0.04077   0.02629  -0.00947  -0.04028
  20        9D+1        0.00000   0.00000   0.00000   0.00000   0.00000
  21        9D-1        0.00593   0.14315   0.04441  -0.04985  -0.08250
  22        9D+2        0.03825  -0.02572   0.02632   0.04768   0.02913
  23        9D-2        0.00000   0.00000   0.00000   0.00000   0.00000
  24       10F 0        0.00339  -0.00032   0.00864  -0.00856  -0.00963
  25       10F+1        0.00000   0.00000   0.00000   0.00000   0.00000
  26       10F-1        0.00662  -0.00101   0.01921  -0.00217  -0.00254
  27       10F+2        0.00069   0.00839   0.00263  -0.00409  -0.00301
  28       10F-2        0.00000   0.00000   0.00000   0.00000   0.00000
  29       10F+3        0.00000   0.00000   0.00000   0.00000   0.00000
  30       10F-3       -0.01065  -0.01174  -0.02632   0.01652   0.01349
  31 2   H  1S         -0.01888  -0.00402  -0.02837  -0.01322   0.00046
  32        2S          0.04597   0.17054   0.27719  -0.34592  -0.28864
  33        3S         -1.20758  -0.69789  -0.73173   0.21205  -0.44584
  34        4PX        -0.01096  -0.00799  -0.01039   0.00649   0.00020
  35        4PY        -0.00031  -0.00442  -0.00067   0.00496   0.00626
  36        4PZ        -0.00098  -0.01026   0.00498  -0.00348  -0.00725
  37        5PX         0.02320   0.03206  -0.05264   0.01211   0.04861
  38        5PY        -0.01561  -0.03433  -0.09769   0.06202   0.06579
  39        5PZ         0.00621   0.01543  -0.01858   0.00574   0.01836
  40        6D 0       -0.00008   0.00067  -0.00399   0.00176   0.00206
  41        6D+1        0.00113   0.00367   0.00021   0.00034   0.00161
  42        6D-1        0.00062   0.00060   0.00138  -0.00211  -0.00173
  43        6D+2        0.00057  -0.00387   0.00162   0.00295   0.00139
  44        6D-2        0.00038   0.00114   0.00909  -0.00373  -0.00639
  45 3   H  1S         -0.01888  -0.00402  -0.02837  -0.01322   0.00046
  46        2S          0.04597   0.17054   0.27719  -0.34592  -0.28864
  47        3S         -1.20758  -0.69789  -0.73173   0.21205  -0.44584
  48        4PX         0.01096   0.00799   0.01039  -0.00649  -0.00020
  49        4PY        -0.00031  -0.00442  -0.00067   0.00496   0.00626
  50        4PZ        -0.00098  -0.01026   0.00498  -0.00348  -0.00725
  51        5PX        -0.02320  -0.03206   0.05264  -0.01211  -0.04861
  52        5PY        -0.01561  -0.03433  -0.09769   0.06202   0.06579
  53        5PZ         0.00621   0.01543  -0.01858   0.00574   0.01836
  54        6D 0       -0.00008   0.00067  -0.00399   0.00176   0.00206
  55        6D+1       -0.00113  -0.00367  -0.00021  -0.00034  -0.00161
  56        6D-1        0.00062   0.00060   0.00138  -0.00211  -0.00173
  57        6D+2        0.00057  -0.00387   0.00162   0.00295   0.00139
  58        6D-2       -0.00038  -0.00114  -0.00909   0.00373   0.00639
  59 4   H  1S          0.01888  -0.00402  -0.02837   0.01322   0.00046
  60        2S         -0.04597   0.17054   0.27719   0.34592  -0.28864
  61        3S          1.20758  -0.69789  -0.73173  -0.21205  -0.44584
  62        4PX        -0.01096   0.00799   0.01039   0.00649  -0.00020
  63        4PY        -0.00031   0.00442   0.00067   0.00496  -0.00626
  64        4PZ         0.00098  -0.01026   0.00498   0.00348  -0.00725
  65        5PX         0.02320  -0.03206   0.05264   0.01211  -0.04861
  66        5PY        -0.01561   0.03433   0.09769   0.06202  -0.06579
  67        5PZ        -0.00621   0.01543  -0.01858  -0.00574   0.01836
  68        6D 0        0.00008   0.00067  -0.00399  -0.00176   0.00206
  69        6D+1        0.00113  -0.00367  -0.00021   0.00034  -0.00161
  70        6D-1        0.00062  -0.00060  -0.00138  -0.00211   0.00173
  71        6D+2       -0.00057  -0.00387   0.00162  -0.00295   0.00139
  72        6D-2       -0.00038   0.00114   0.00909   0.00373  -0.00639
  73 5   H  1S          0.01888  -0.00402  -0.02837   0.01322   0.00046
  74        2S         -0.04597   0.17054   0.27719   0.34592  -0.28864
  75        3S          1.20758  -0.69789  -0.73173  -0.21205  -0.44584
  76        4PX         0.01096  -0.00799  -0.01039  -0.00649   0.00020
  77        4PY        -0.00031   0.00442   0.00067   0.00496  -0.00626
  78        4PZ         0.00098  -0.01026   0.00498   0.00348  -0.00725
  79        5PX        -0.02320   0.03206  -0.05264  -0.01211   0.04861
  80        5PY        -0.01561   0.03433   0.09769   0.06202  -0.06579
  81        5PZ        -0.00621   0.01543  -0.01858  -0.00574   0.01836
  82        6D 0        0.00008   0.00067  -0.00399  -0.00176   0.00206
  83        6D+1       -0.00113   0.00367   0.00021  -0.00034   0.00161
  84        6D-1        0.00062  -0.00060  -0.00138  -0.00211   0.00173
  85        6D+2       -0.00057  -0.00387   0.00162  -0.00295   0.00139
  86        6D-2        0.00038  -0.00114  -0.00909  -0.00373   0.00639
  87 6   C  1S         -0.00291  -0.00101   0.01670  -0.02686   0.03821
  88        2S         -0.04019  -0.01368  -0.00730   0.06027  -0.06979
  89        3S         -0.03317   0.00595   0.04767   0.04225  -0.03183
  90        4S          2.10443   0.19748  -3.82368  -2.14269  -0.11900
  91        5PX         0.00000   0.00000   0.00000   0.00000   0.00000
  92        5PY         0.04560  -0.06468  -0.02571   0.03234  -0.05489
  93        5PZ         0.04281  -0.05852   0.07089   0.01571  -0.03123
  94        6PX         0.00000   0.00000   0.00000   0.00000   0.00000
  95        6PY         0.10709  -0.11387  -0.00476   0.02023  -0.10264
  96        6PZ        -0.00424  -0.17255   0.04155   0.00671   0.14630
  97        7PX         0.00000   0.00000   0.00000   0.00000   0.00000
  98        7PY         1.98112  -0.38252  -1.68750  -0.76531  -1.17992
  99        7PZ         0.15969  -1.60921   0.65391  -0.15252  -0.32597
 100        8D 0       -0.00632  -0.00179   0.02063  -0.01153  -0.00457
 101        8D+1        0.00000   0.00000   0.00000   0.00000   0.00000
 102        8D-1        0.00068   0.01639  -0.00455  -0.01368   0.01943
 103        8D+2        0.00719   0.00776  -0.00298   0.00511  -0.01202
 104        8D-2        0.00000   0.00000   0.00000   0.00000   0.00000
 105        9D 0       -0.01512   0.04077   0.02629   0.00947  -0.04028
 106        9D+1        0.00000   0.00000   0.00000   0.00000   0.00000
 107        9D-1        0.00593  -0.14315  -0.04441  -0.04985   0.08250
 108        9D+2       -0.03825  -0.02572   0.02632  -0.04768   0.02913
 109        9D-2        0.00000   0.00000   0.00000   0.00000   0.00000
 110       10F 0       -0.00339  -0.00032   0.00864   0.00856  -0.00963
 111       10F+1        0.00000   0.00000   0.00000   0.00000   0.00000
 112       10F-1        0.00662   0.00101  -0.01921  -0.00217   0.00254
 113       10F+2       -0.00069   0.00839   0.00263   0.00409  -0.00301
 114       10F-2        0.00000   0.00000   0.00000   0.00000   0.00000
 115       10F+3        0.00000   0.00000   0.00000   0.00000   0.00000
 116       10F-3       -0.01065   0.01174   0.02632   0.01652  -0.01349
 117 7   C  1S         -0.00132   0.01530  -0.01836  -0.01505  -0.00483
 118        2S          0.04040  -0.06772   0.05598   0.04684   0.06867
 119        3S          0.03263  -0.00379  -0.00225  -0.02778   0.02361
 120        4S         -2.63886  -1.47168   1.57454   6.64481   0.32109
 121        5PX         0.00000   0.00000   0.00000   0.00000   0.00000
 122        5PY         0.01753   0.02408  -0.02178   0.02319   0.04560
 123        5PZ        -0.04235  -0.02103   0.06017   0.00430  -0.01962
 124        6PX         0.00000   0.00000   0.00000   0.00000   0.00000
 125        6PY        -0.08761   0.04303  -0.08141   0.45936   0.20168
 126        6PZ        -0.10172  -0.18497   0.16689  -0.01441   0.00871
 127        7PX         0.00000   0.00000   0.00000   0.00000   0.00000
 128        7PY        -1.36955   0.51319  -0.77371   3.87595  -0.29744
 129        7PZ        -2.35829  -0.54517   0.78457   1.39416   0.68364
 130        8D 0        0.00870  -0.00056  -0.00651   0.00746  -0.03239
 131        8D+1        0.00000   0.00000   0.00000   0.00000   0.00000
 132        8D-1        0.00696  -0.00432   0.01519   0.00357  -0.00062
 133        8D+2        0.00566  -0.00116   0.00124   0.00534  -0.01754
 134        8D-2        0.00000   0.00000   0.00000   0.00000   0.00000
 135        9D 0       -0.01005  -0.07921  -0.01368  -0.13458   0.14329
 136        9D+1        0.00000   0.00000   0.00000   0.00000   0.00000
 137        9D-1        0.04722   0.02288  -0.04748  -0.09159  -0.03417
 138        9D+2        0.08479   0.02713   0.00069  -0.28605   0.05495
 139        9D-2        0.00000   0.00000   0.00000   0.00000   0.00000
 140       10F 0       -0.00311  -0.00886  -0.00200   0.00331   0.00455
 141       10F+1        0.00000   0.00000   0.00000   0.00000   0.00000
 142       10F-1        0.00945   0.00156  -0.00910  -0.02154   0.00497
 143       10F+2        0.00811   0.00229  -0.00045   0.00241  -0.01074
 144       10F-2        0.00000   0.00000   0.00000   0.00000   0.00000
 145       10F+3        0.00000   0.00000   0.00000   0.00000   0.00000
 146       10F-3        0.00696  -0.00134   0.00095  -0.02614   0.01256
 147 8   H  1S          0.01931  -0.02528   0.00594   0.02127  -0.01403
 148        2S         -0.11310  -0.16184  -0.12909   0.17559   0.09605
 149        3S         -1.76372   0.06242   0.33207   1.38042   0.23492
 150        4PX         0.00000   0.00000   0.00000   0.00000   0.00000
 151        4PY         0.00490  -0.00099  -0.01044   0.00931  -0.00278
 152        4PZ         0.00526  -0.00607  -0.00000  -0.00460   0.00426
 153        5PX         0.00000   0.00000   0.00000   0.00000   0.00000
 154        5PY        -0.01284  -0.00778   0.02064  -0.00207  -0.03232
 155        5PZ        -0.04718  -0.02223  -0.00549   0.00466   0.08539
 156        6D 0       -0.00362  -0.00431  -0.00149  -0.00099   0.01292
 157        6D+1        0.00000   0.00000   0.00000   0.00000   0.00000
 158        6D-1       -0.00193  -0.00538  -0.00044   0.00382   0.00179
 159        6D+2       -0.00135   0.00196   0.00111   0.00288   0.00090
 160        6D-2        0.00000   0.00000   0.00000   0.00000   0.00000
 161 9   C  1S          0.00132   0.01530  -0.01836   0.01505  -0.00483
 162        2S         -0.04040  -0.06772   0.05598  -0.04684   0.06867
 163        3S         -0.03263  -0.00379  -0.00225   0.02778   0.02361
 164        4S          2.63886  -1.47168   1.57454  -6.64481   0.32109
 165        5PX         0.00000   0.00000   0.00000   0.00000   0.00000
 166        5PY         0.01753  -0.02408   0.02178   0.02319  -0.04560
 167        5PZ         0.04235  -0.02103   0.06017  -0.00430  -0.01962
 168        6PX         0.00000   0.00000   0.00000   0.00000   0.00000
 169        6PY        -0.08761  -0.04303   0.08141   0.45936  -0.20168
 170        6PZ         0.10172  -0.18497   0.16689   0.01441   0.00871
 171        7PX         0.00000   0.00000   0.00000   0.00000   0.00000
 172        7PY        -1.36955  -0.51319   0.77371   3.87595   0.29744
 173        7PZ         2.35829  -0.54517   0.78457  -1.39416   0.68364
 174        8D 0       -0.00870  -0.00056  -0.00651  -0.00746  -0.03239
 175        8D+1        0.00000   0.00000   0.00000   0.00000   0.00000
 176        8D-1        0.00696   0.00432  -0.01519   0.00357   0.00062
 177        8D+2       -0.00566  -0.00116   0.00124  -0.00534  -0.01754
 178        8D-2        0.00000   0.00000   0.00000   0.00000   0.00000
 179        9D 0        0.01005  -0.07921  -0.01368   0.13458   0.14329
 180        9D+1        0.00000   0.00000   0.00000   0.00000   0.00000
 181        9D-1        0.04722  -0.02288   0.04748  -0.09159   0.03417
 182        9D+2       -0.08479   0.02713   0.00069   0.28605   0.05495
 183        9D-2        0.00000   0.00000   0.00000   0.00000   0.00000
 184       10F 0        0.00311  -0.00886  -0.00200  -0.00331   0.00455
 185       10F+1        0.00000   0.00000   0.00000   0.00000   0.00000
 186       10F-1        0.00945  -0.00156   0.00910  -0.02154  -0.00497
 187       10F+2       -0.00811   0.00229  -0.00045  -0.00241  -0.01074
 188       10F-2        0.00000   0.00000   0.00000   0.00000   0.00000
 189       10F+3        0.00000   0.00000   0.00000   0.00000   0.00000
 190       10F-3        0.00696   0.00134  -0.00095  -0.02614  -0.01256
 191 10  H  1S         -0.01931  -0.02528   0.00594  -0.02127  -0.01403
 192        2S          0.11310  -0.16184  -0.12909  -0.17559   0.09605
 193        3S          1.76372   0.06242   0.33207  -1.38042   0.23492
 194        4PX         0.00000   0.00000   0.00000   0.00000   0.00000
 195        4PY         0.00490   0.00099   0.01044   0.00931   0.00278
 196        4PZ        -0.00526  -0.00607  -0.00000   0.00460   0.00426
 197        5PX         0.00000   0.00000   0.00000   0.00000   0.00000
 198        5PY        -0.01284   0.00778  -0.02064  -0.00207   0.03232
 199        5PZ         0.04718  -0.02223  -0.00549  -0.00466   0.08539
 200        6D 0        0.00362  -0.00431  -0.00149   0.00099   0.01292
 201        6D+1        0.00000   0.00000   0.00000   0.00000   0.00000
 202        6D-1       -0.00193   0.00538   0.00044   0.00382  -0.00179
 203        6D+2        0.00135   0.00196   0.00111  -0.00288   0.00090
 204        6D-2        0.00000   0.00000   0.00000   0.00000   0.00000
 205 11  Si 1S          0.00000   0.01407  -0.01056   0.00000   0.05259
 206        2S          0.00000  -0.13908  -0.03025   0.00000  -0.04385
 207        3S          0.00000  -0.07716  -0.30533   0.00000   0.93461
 208        4S          0.00000  -0.19306  -0.23501   0.00000   0.24555
 209        5S          0.00000   4.57283   4.55272   0.00000   0.28715
 210        6PX         0.00000   0.00000   0.00000   0.00000   0.00000
 211        6PY        -0.02037   0.00000   0.00000  -0.14431   0.00000
 212        6PZ         0.00000  -0.02304  -0.07554   0.00000   0.02785
 213        7PX         0.00000   0.00000   0.00000   0.00000   0.00000
 214        7PY         0.28351   0.00000   0.00000   0.43976   0.00000
 215        7PZ         0.00000   0.11241   0.17999   0.00000  -0.43176
 216        8PX         0.00000   0.00000   0.00000   0.00000   0.00000
 217        8PY        -0.01145   0.00000   0.00000   0.06723   0.00000
 218        8PZ         0.00000   0.00612   0.04530   0.00000   0.00057
 219        9PX         0.00000   0.00000   0.00000   0.00000   0.00000
 220        9PY         2.76604   0.00000   0.00000  -1.60248   0.00000
 221        9PZ         0.00000  -1.20250  -3.49694   0.00000  -0.37541
 222       10D 0        0.00000  -0.14687   0.28777   0.00000  -0.05571
 223       10D+1        0.00000   0.00000   0.00000   0.00000   0.00000
 224       10D-1       -0.50196   0.00000   0.00000   0.85219   0.00000
 225       10D+2        0.00000  -0.18772  -0.69412   0.00000  -0.09897
 226       10D-2        0.00000   0.00000   0.00000   0.00000   0.00000
 227       11D 0        0.00000  -0.01215  -0.08635   0.00000   0.01146
 228       11D+1        0.00000   0.00000   0.00000   0.00000   0.00000
 229       11D-1        0.07498   0.00000   0.00000   0.00295   0.00000
 230       11D+2        0.00000   0.03041  -0.03373   0.00000  -0.03644
 231       11D-2        0.00000   0.00000   0.00000   0.00000   0.00000
 232       12F 0        0.00000   0.03496   0.04668   0.00000   0.01404
 233       12F+1        0.00000   0.00000   0.00000   0.00000   0.00000
 234       12F-1        0.04324   0.00000   0.00000  -0.04844   0.00000
 235       12F+2        0.00000   0.11547   0.09069   0.00000  -0.15808
 236       12F-2        0.00000   0.00000   0.00000   0.00000   0.00000
 237       12F+3        0.00000   0.00000   0.00000   0.00000   0.00000
 238       12F-3       -0.01555   0.00000   0.00000   0.02161   0.00000
 239 12  F  1S          0.00000   0.04144  -0.00788   0.00000   0.00264
 240        2S          0.00000  -0.05430  -0.01177   0.00000  -0.04509
 241        3S          0.00000  -0.02693   0.00327   0.00000  -0.00975
 242        4S          0.00000  -0.54651   0.18881   0.00000   0.21195
 243        5PX         0.00000   0.02764   0.00251   0.00000   0.04647
 244        5PY        -0.06807   0.00000   0.00000  -0.03789   0.00000
 245        5PZ         0.00000   0.03107   0.04397   0.00000   0.03750
 246        6PX         0.00000   0.04710   0.00970   0.00000   0.05118
 247        6PY        -0.06424   0.00000   0.00000  -0.05259   0.00000
 248        6PZ         0.00000   0.03458   0.04519   0.00000   0.03527
 249        7PX         0.00000   0.14877   0.03716   0.00000  -0.05037
 250        7PY        -0.18717   0.00000   0.00000  -0.07807   0.00000
 251        7PZ         0.00000   0.20040   0.10557   0.00000  -0.00991
 252        8D 0        0.00000   0.00024  -0.00201   0.00000   0.00002
 253        8D+1        0.00000   0.00159   0.00057   0.00000  -0.00043
 254        8D-1       -0.00042   0.00000   0.00000  -0.00127   0.00000
 255        8D+2        0.00000   0.00106   0.00126   0.00000  -0.00066
 256        8D-2       -0.00056   0.00000   0.00000  -0.00351   0.00000
 257        9D 0        0.00000  -0.00027  -0.00166   0.00000   0.00262
 258        9D+1        0.00000  -0.01751  -0.00280   0.00000   0.01925
 259        9D-1        0.00596   0.00000   0.00000  -0.00479   0.00000
 260        9D+2        0.00000  -0.00583  -0.00766   0.00000   0.01207
 261        9D-2       -0.00563   0.00000   0.00000  -0.00502   0.00000
 262       10F 0        0.00000  -0.00063   0.00059   0.00000   0.00009
 263       10F+1        0.00000   0.00083   0.00068   0.00000  -0.00050
 264       10F-1       -0.00042   0.00000   0.00000  -0.00002   0.00000
 265       10F+2        0.00000   0.00099   0.00003   0.00000  -0.00039
 266       10F-2       -0.00050   0.00000   0.00000   0.00057   0.00000
 267       10F+3        0.00000   0.00065   0.00026   0.00000  -0.00013
 268       10F-3       -0.00030   0.00000   0.00000   0.00065   0.00000
 269 13  F  1S          0.00000   0.04144  -0.00788   0.00000   0.00264
 270        2S          0.00000  -0.05430  -0.01177   0.00000  -0.04509
 271        3S          0.00000  -0.02693   0.00327   0.00000  -0.00975
 272        4S          0.00000  -0.54651   0.18881   0.00000   0.21195
 273        5PX         0.00000  -0.02764  -0.00251   0.00000  -0.04647
 274        5PY        -0.06807   0.00000   0.00000  -0.03789   0.00000
 275        5PZ         0.00000   0.03107   0.04397   0.00000   0.03750
 276        6PX         0.00000  -0.04710  -0.00970   0.00000  -0.05118
 277        6PY        -0.06424   0.00000   0.00000  -0.05259   0.00000
 278        6PZ         0.00000   0.03458   0.04519   0.00000   0.03527
 279        7PX         0.00000  -0.14877  -0.03716   0.00000   0.05037
 280        7PY        -0.18717   0.00000   0.00000  -0.07807   0.00000
 281        7PZ         0.00000   0.20040   0.10557   0.00000  -0.00991
 282        8D 0        0.00000   0.00024  -0.00201   0.00000   0.00002
 283        8D+1        0.00000  -0.00159  -0.00057   0.00000   0.00043
 284        8D-1       -0.00042   0.00000   0.00000  -0.00127   0.00000
 285        8D+2        0.00000   0.00106   0.00126   0.00000  -0.00066
 286        8D-2        0.00056   0.00000   0.00000   0.00351   0.00000
 287        9D 0        0.00000  -0.00027  -0.00166   0.00000   0.00262
 288        9D+1        0.00000   0.01751   0.00280   0.00000  -0.01925
 289        9D-1        0.00596   0.00000   0.00000  -0.00479   0.00000
 290        9D+2        0.00000  -0.00583  -0.00766   0.00000   0.01207
 291        9D-2        0.00563   0.00000   0.00000   0.00502   0.00000
 292       10F 0        0.00000  -0.00063   0.00059   0.00000   0.00009
 293       10F+1        0.00000  -0.00083  -0.00068   0.00000   0.00050
 294       10F-1       -0.00042   0.00000   0.00000  -0.00002   0.00000
 295       10F+2        0.00000   0.00099   0.00003   0.00000  -0.00039
 296       10F-2        0.00050   0.00000   0.00000  -0.00057   0.00000
 297       10F+3        0.00000  -0.00065  -0.00026   0.00000   0.00013
 298       10F-3       -0.00030   0.00000   0.00000   0.00065   0.00000
                          46        47        48        49        50
                        (B2)--V   (A1)--V   (B1)--V   (A1)--V   (B2)--V
     Eigenvalues --     0.38093   0.41289   0.42825   0.43736   0.44002
   1 1   C  1S         -0.01561   0.02431   0.00000   0.03796  -0.02261
   2        2S         -0.03703  -0.07399   0.00000  -0.01987   0.16265
   3        3S         -0.02568  -0.00541   0.00000  -0.00426   0.05698
   4        4S          1.96852  -0.44336   0.00000   0.15608  -0.81520
   5        5PX         0.00000   0.00000   0.02859   0.00000   0.00000
   6        5PY         0.01949   0.03532   0.00000   0.03409  -0.07502
   7        5PZ        -0.00631   0.03730   0.00000  -0.09310   0.04401
   8        6PX         0.00000   0.00000  -0.12036   0.00000   0.00000
   9        6PY         0.04997   0.21132   0.00000   0.07220  -0.10549
  10        6PZ        -0.18716   0.20505   0.00000  -0.21025   0.06178
  11        7PX         0.00000   0.00000  -0.25549   0.00000   0.00000
  12        7PY        -2.11134   0.73896   0.00000   2.10040   1.78884
  13        7PZ        -2.45028   0.91257   0.00000   0.92306  -1.96450
  14        8D 0       -0.01189  -0.01929   0.00000  -0.00106  -0.00273
  15        8D+1        0.00000   0.00000   0.00352   0.00000   0.00000
  16        8D-1       -0.01949   0.00608   0.00000   0.01649  -0.02448
  17        8D+2        0.02447   0.00323   0.00000  -0.02557  -0.02362
  18        8D-2        0.00000   0.00000   0.01185   0.00000   0.00000
  19        9D 0        0.15892  -0.08774   0.00000  -0.10754  -0.04035
  20        9D+1        0.00000   0.00000  -0.06660   0.00000   0.00000
  21        9D-1        0.20615  -0.03764   0.00000  -0.08552   0.12189
  22        9D+2       -0.10833   0.00960   0.00000   0.15511   0.18027
  23        9D-2        0.00000   0.00000  -0.20594   0.00000   0.00000
  24       10F 0       -0.00676   0.00157   0.00000   0.00754   0.00522
  25       10F+1        0.00000   0.00000   0.02250   0.00000   0.00000
  26       10F-1       -0.02014   0.00267   0.00000   0.00171   0.01849
  27       10F+2        0.00851   0.00030   0.00000  -0.00468   0.01311
  28       10F-2        0.00000   0.00000  -0.01158   0.00000   0.00000
  29       10F+3        0.00000   0.00000   0.00987   0.00000   0.00000
  30       10F-3       -0.00660  -0.00122   0.00000   0.01100  -0.00185
  31 2   H  1S          0.00869   0.02157   0.01836   0.00767  -0.01217
  32        2S          0.33470   0.00549   0.58560  -0.38390  -0.20333
  33        3S          0.08721  -0.68305  -0.67435  -0.87691  -0.72407
  34        4PX         0.00202  -0.00717  -0.01346  -0.00336  -0.00159
  35        4PY        -0.01311  -0.00179  -0.00847   0.00845   0.00578
  36        4PZ        -0.00941   0.00015  -0.00295   0.00973  -0.00849
  37        5PX         0.01533   0.10043  -0.07537   0.04292  -0.03187
  38        5PY        -0.00721   0.03238  -0.04597   0.08305   0.01987
  39        5PZ         0.00577   0.02721   0.03858  -0.03237   0.03746
  40        6D 0        0.00091   0.00246  -0.00110   0.00122  -0.00398
  41        6D+1        0.00383  -0.00128  -0.00077  -0.00256   0.00326
  42        6D-1        0.00174  -0.00079  -0.00271   0.00021   0.00027
  43        6D+2       -0.00801  -0.00476   0.00478   0.00817   0.00853
  44        6D-2       -0.00181  -0.00583   0.00753  -0.00403  -0.00017
  45 3   H  1S          0.00869   0.02157  -0.01836   0.00767  -0.01217
  46        2S          0.33470   0.00549  -0.58560  -0.38390  -0.20333
  47        3S          0.08721  -0.68305   0.67435  -0.87691  -0.72407
  48        4PX        -0.00202   0.00717  -0.01346   0.00336   0.00159
  49        4PY        -0.01311  -0.00179   0.00847   0.00845   0.00578
  50        4PZ        -0.00941   0.00015   0.00295   0.00973  -0.00849
  51        5PX        -0.01533  -0.10043  -0.07537  -0.04292   0.03187
  52        5PY        -0.00721   0.03238   0.04597   0.08305   0.01987
  53        5PZ         0.00577   0.02721  -0.03858  -0.03237   0.03746
  54        6D 0        0.00091   0.00246   0.00110   0.00122  -0.00398
  55        6D+1       -0.00383   0.00128  -0.00077   0.00256  -0.00326
  56        6D-1        0.00174  -0.00079   0.00271   0.00021   0.00027
  57        6D+2       -0.00801  -0.00476  -0.00478   0.00817   0.00853
  58        6D-2        0.00181   0.00583   0.00753   0.00403   0.00017
  59 4   H  1S         -0.00869   0.02157  -0.01836   0.00767   0.01217
  60        2S         -0.33470   0.00549  -0.58560  -0.38390   0.20333
  61        3S         -0.08721  -0.68305   0.67435  -0.87691   0.72407
  62        4PX         0.00202   0.00717  -0.01346   0.00336  -0.00159
  63        4PY        -0.01311   0.00179  -0.00847  -0.00845   0.00578
  64        4PZ         0.00941   0.00015   0.00295   0.00973   0.00849
  65        5PX         0.01533  -0.10043  -0.07537  -0.04292  -0.03187
  66        5PY        -0.00721  -0.03238  -0.04597  -0.08305   0.01987
  67        5PZ        -0.00577   0.02721  -0.03858  -0.03237  -0.03746
  68        6D 0       -0.00091   0.00246   0.00110   0.00122   0.00398
  69        6D+1        0.00383   0.00128  -0.00077   0.00256   0.00326
  70        6D-1        0.00174   0.00079  -0.00271  -0.00021   0.00027
  71        6D+2        0.00801  -0.00476  -0.00478   0.00817  -0.00853
  72        6D-2        0.00181  -0.00583  -0.00753  -0.00403   0.00017
  73 5   H  1S         -0.00869   0.02157   0.01836   0.00767   0.01217
  74        2S         -0.33470   0.00549   0.58560  -0.38390   0.20333
  75        3S         -0.08721  -0.68305  -0.67435  -0.87691   0.72407
  76        4PX        -0.00202  -0.00717  -0.01346  -0.00336   0.00159
  77        4PY        -0.01311   0.00179   0.00847  -0.00845   0.00578
  78        4PZ         0.00941   0.00015  -0.00295   0.00973   0.00849
  79        5PX        -0.01533   0.10043  -0.07537   0.04292   0.03187
  80        5PY        -0.00721  -0.03238   0.04597  -0.08305   0.01987
  81        5PZ        -0.00577   0.02721   0.03858  -0.03237  -0.03746
  82        6D 0       -0.00091   0.00246  -0.00110   0.00122   0.00398
  83        6D+1       -0.00383  -0.00128  -0.00077  -0.00256  -0.00326
  84        6D-1        0.00174   0.00079   0.00271  -0.00021   0.00027
  85        6D+2        0.00801  -0.00476   0.00478   0.00817  -0.00853
  86        6D-2       -0.00181   0.00583  -0.00753   0.00403  -0.00017
  87 6   C  1S          0.01561   0.02431   0.00000   0.03796   0.02261
  88        2S          0.03703  -0.07399   0.00000  -0.01987  -0.16265
  89        3S          0.02568  -0.00541   0.00000  -0.00426  -0.05698
  90        4S         -1.96852  -0.44336   0.00000   0.15608   0.81520
  91        5PX         0.00000   0.00000   0.02859   0.00000   0.00000
  92        5PY         0.01949  -0.03532   0.00000  -0.03409  -0.07502
  93        5PZ         0.00631   0.03730   0.00000  -0.09310  -0.04401
  94        6PX         0.00000   0.00000  -0.12036   0.00000   0.00000
  95        6PY         0.04997  -0.21132   0.00000  -0.07220  -0.10549
  96        6PZ         0.18716   0.20505   0.00000  -0.21025  -0.06178
  97        7PX         0.00000   0.00000  -0.25549   0.00000   0.00000
  98        7PY        -2.11134  -0.73896   0.00000  -2.10040   1.78884
  99        7PZ         2.45028   0.91257   0.00000   0.92306   1.96450
 100        8D 0        0.01189  -0.01929   0.00000  -0.00106   0.00273
 101        8D+1        0.00000   0.00000   0.00352   0.00000   0.00000
 102        8D-1       -0.01949  -0.00608   0.00000  -0.01649  -0.02448
 103        8D+2       -0.02447   0.00323   0.00000  -0.02557   0.02362
 104        8D-2        0.00000   0.00000  -0.01185   0.00000   0.00000
 105        9D 0       -0.15892  -0.08774   0.00000  -0.10754   0.04035
 106        9D+1        0.00000   0.00000  -0.06660   0.00000   0.00000
 107        9D-1        0.20615   0.03764   0.00000   0.08552   0.12189
 108        9D+2        0.10833   0.00960   0.00000   0.15511  -0.18027
 109        9D-2        0.00000   0.00000   0.20594   0.00000   0.00000
 110       10F 0        0.00676   0.00157   0.00000   0.00754  -0.00522
 111       10F+1        0.00000   0.00000   0.02250   0.00000   0.00000
 112       10F-1       -0.02014  -0.00267   0.00000  -0.00171   0.01849
 113       10F+2       -0.00851   0.00030   0.00000  -0.00468  -0.01311
 114       10F-2        0.00000   0.00000   0.01158   0.00000   0.00000
 115       10F+3        0.00000   0.00000   0.00987   0.00000   0.00000
 116       10F-3       -0.00660   0.00122   0.00000  -0.01100  -0.00185
 117 7   C  1S         -0.03729  -0.00279   0.00000   0.00657  -0.02690
 118        2S          0.09703  -0.00229   0.00000  -0.01536   0.10076
 119        3S         -0.01790   0.00368   0.00000  -0.02315   0.01000
 120        4S          5.31200   1.17095   0.00000   0.34859   2.28400
 121        5PX         0.00000   0.00000   0.05970   0.00000   0.00000
 122        5PY        -0.01264   0.01747   0.00000  -0.03496  -0.01718
 123        5PZ         0.02565   0.00864   0.00000   0.00762   0.04375
 124        6PX         0.00000   0.00000   0.17379   0.00000   0.00000
 125        6PY        -0.04343   0.10811   0.00000  -0.22072   0.26651
 126        6PZ         0.33559   0.11327   0.00000   0.28891  -0.00337
 127        7PX         0.00000   0.00000  -0.12117   0.00000   0.00000
 128        7PY         0.93984  -0.66382   0.00000   0.73984   0.54366
 129        7PZ         2.97945   1.11612   0.00000   0.08547   1.13066
 130        8D 0       -0.00225  -0.00920   0.00000   0.02104  -0.00214
 131        8D+1        0.00000   0.00000  -0.00290   0.00000   0.00000
 132        8D-1       -0.01048   0.03162   0.00000  -0.01327  -0.00492
 133        8D+2        0.00659  -0.00889   0.00000   0.01474   0.00269
 134        8D-2        0.00000   0.00000   0.00572   0.00000   0.00000
 135        9D 0        0.13554   0.08420   0.00000  -0.05737  -0.19066
 136        9D+1        0.00000   0.00000  -0.05777   0.00000   0.00000
 137        9D-1       -0.15501  -0.09261   0.00000  -0.00694  -0.00699
 138        9D+2       -0.08121   0.03546   0.00000  -0.09756  -0.18415
 139        9D-2        0.00000   0.00000   0.01810   0.00000   0.00000
 140       10F 0        0.00833   0.00474   0.00000   0.01088   0.00159
 141       10F+1        0.00000   0.00000  -0.00586   0.00000   0.00000
 142       10F-1       -0.00528   0.00112   0.00000   0.00521  -0.01703
 143       10F+2       -0.01547  -0.01087   0.00000   0.00447   0.00754
 144       10F-2        0.00000   0.00000   0.00364   0.00000   0.00000
 145       10F+3        0.00000   0.00000  -0.00094   0.00000   0.00000
 146       10F-3       -0.00162   0.00608   0.00000  -0.01083  -0.01857
 147 8   H  1S         -0.01705   0.05382   0.00000   0.00488  -0.01707
 148        2S          0.19527   0.48063   0.00000   0.25983  -0.10395
 149        3S          1.13655   0.28421   0.00000   0.06111   0.97681
 150        4PX         0.00000   0.00000  -0.00147   0.00000   0.00000
 151        4PY         0.00369  -0.00136   0.00000   0.00916  -0.00629
 152        4PZ         0.00274   0.01427   0.00000   0.00202  -0.00780
 153        5PX         0.00000   0.00000   0.00698   0.00000   0.00000
 154        5PY         0.00589  -0.02053   0.00000   0.06666   0.09734
 155        5PZ         0.08780   0.02547   0.00000   0.01896   0.01000
 156        6D 0        0.01030   0.00727   0.00000  -0.00371  -0.00470
 157        6D+1        0.00000   0.00000  -0.00233   0.00000   0.00000
 158        6D-1        0.00788   0.00114   0.00000   0.01167   0.00400
 159        6D+2        0.00059   0.00139   0.00000  -0.00584  -0.00096
 160        6D-2        0.00000   0.00000  -0.00004   0.00000   0.00000
 161 9   C  1S          0.03729  -0.00279   0.00000   0.00657   0.02690
 162        2S         -0.09703  -0.00229   0.00000  -0.01536  -0.10076
 163        3S          0.01790   0.00368   0.00000  -0.02315  -0.01000
 164        4S         -5.31200   1.17095   0.00000   0.34859  -2.28400
 165        5PX         0.00000   0.00000   0.05970   0.00000   0.00000
 166        5PY        -0.01264  -0.01747   0.00000   0.03496  -0.01718
 167        5PZ        -0.02565   0.00864   0.00000   0.00762  -0.04375
 168        6PX         0.00000   0.00000   0.17379   0.00000   0.00000
 169        6PY        -0.04343  -0.10811   0.00000   0.22072   0.26651
 170        6PZ        -0.33559   0.11327   0.00000   0.28891   0.00337
 171        7PX         0.00000   0.00000  -0.12117   0.00000   0.00000
 172        7PY         0.93984   0.66382   0.00000  -0.73984   0.54366
 173        7PZ        -2.97945   1.11612   0.00000   0.08547  -1.13066
 174        8D 0        0.00225  -0.00920   0.00000   0.02104   0.00214
 175        8D+1        0.00000   0.00000  -0.00290   0.00000   0.00000
 176        8D-1       -0.01048  -0.03162   0.00000   0.01327  -0.00492
 177        8D+2       -0.00659  -0.00889   0.00000   0.01474  -0.00269
 178        8D-2        0.00000   0.00000  -0.00572   0.00000   0.00000
 179        9D 0       -0.13554   0.08420   0.00000  -0.05737   0.19066
 180        9D+1        0.00000   0.00000  -0.05777   0.00000   0.00000
 181        9D-1       -0.15501   0.09261   0.00000   0.00694  -0.00699
 182        9D+2        0.08121   0.03546   0.00000  -0.09756   0.18415
 183        9D-2        0.00000   0.00000  -0.01810   0.00000   0.00000
 184       10F 0       -0.00833   0.00474   0.00000   0.01088  -0.00159
 185       10F+1        0.00000   0.00000  -0.00586   0.00000   0.00000
 186       10F-1       -0.00528  -0.00112   0.00000  -0.00521  -0.01703
 187       10F+2        0.01547  -0.01087   0.00000   0.00447  -0.00754
 188       10F-2        0.00000   0.00000  -0.00364   0.00000   0.00000
 189       10F+3        0.00000   0.00000  -0.00094   0.00000   0.00000
 190       10F-3       -0.00162  -0.00608   0.00000   0.01083  -0.01857
 191 10  H  1S          0.01705   0.05382   0.00000   0.00488   0.01707
 192        2S         -0.19527   0.48063   0.00000   0.25983   0.10395
 193        3S         -1.13655   0.28421   0.00000   0.06111  -0.97681
 194        4PX         0.00000   0.00000  -0.00147   0.00000   0.00000
 195        4PY         0.00369   0.00136   0.00000  -0.00916  -0.00629
 196        4PZ        -0.00274   0.01427   0.00000   0.00202   0.00780
 197        5PX         0.00000   0.00000   0.00698   0.00000   0.00000
 198        5PY         0.00589   0.02053   0.00000  -0.06666   0.09734
 199        5PZ        -0.08780   0.02547   0.00000   0.01896  -0.01000
 200        6D 0       -0.01030   0.00727   0.00000  -0.00371   0.00470
 201        6D+1        0.00000   0.00000  -0.00233   0.00000   0.00000
 202        6D-1        0.00788  -0.00114   0.00000  -0.01167   0.00400
 203        6D+2       -0.00059   0.00139   0.00000  -0.00584   0.00096
 204        6D-2        0.00000   0.00000   0.00004   0.00000   0.00000
 205 11  Si 1S          0.00000  -0.02603   0.00000   0.01619   0.00000
 206        2S          0.00000   0.03254   0.00000  -0.07663   0.00000
 207        3S          0.00000  -0.44407   0.00000   0.13061   0.00000
 208        4S          0.00000  -0.17866   0.00000  -0.03894   0.00000
 209        5S          0.00000   1.03335   0.00000   2.40746   0.00000
 210        6PX         0.00000   0.00000   0.07496   0.00000   0.00000
 211        6PY        -0.00401   0.00000   0.00000   0.00000   0.08756
 212        6PZ         0.00000   0.06758   0.00000   0.02318   0.00000
 213        7PX         0.00000   0.00000  -0.22998   0.00000   0.00000
 214        7PY        -0.22498   0.00000   0.00000   0.00000   0.42994
 215        7PZ         0.00000  -0.11796   0.00000  -0.07744   0.00000
 216        8PX         0.00000   0.00000  -0.03837   0.00000   0.00000
 217        8PY         0.00261   0.00000   0.00000   0.00000  -0.07485
 218        8PZ         0.00000  -0.03593   0.00000  -0.00573   0.00000
 219        9PX         0.00000   0.00000   1.76020   0.00000   0.00000
 220        9PY         2.36985   0.00000   0.00000   0.00000   3.10035
 221        9PZ         0.00000   0.22194   0.00000  -1.83827   0.00000
 222       10D 0        0.00000   0.10297   0.00000   0.77285   0.00000
 223       10D+1        0.00000   0.00000   1.03663   0.00000   0.00000
 224       10D-1       -0.32320   0.00000   0.00000   0.00000  -1.49338
 225       10D+2        0.00000   0.87361   0.00000   0.38473   0.00000
 226       10D-2        0.00000   0.00000   0.00000   0.00000   0.00000
 227       11D 0        0.00000   0.03017   0.00000  -0.01549   0.00000
 228       11D+1        0.00000   0.00000   0.11311   0.00000   0.00000
 229       11D-1        0.03650   0.00000   0.00000   0.00000  -0.17957
 230       11D+2        0.00000   0.09189   0.00000   0.04584   0.00000
 231       11D-2        0.00000   0.00000   0.00000   0.00000   0.00000
 232       12F 0        0.00000  -0.07368   0.00000  -0.10671   0.00000
 233       12F+1        0.00000   0.00000   0.04960   0.00000   0.00000
 234       12F-1        0.00818   0.00000   0.00000   0.00000   0.12816
 235       12F+2        0.00000   0.11411   0.00000  -0.01407   0.00000
 236       12F-2        0.00000   0.00000   0.00000   0.00000   0.00000
 237       12F+3        0.00000   0.00000   0.05040   0.00000   0.00000
 238       12F-3       -0.02223   0.00000   0.00000   0.00000  -0.07335
 239 12  F  1S          0.00000   0.01272   0.03989   0.01126   0.00000
 240        2S          0.00000   0.05618   0.03708  -0.02484   0.00000
 241        3S          0.00000   0.00459  -0.01188  -0.00751   0.00000
 242        4S          0.00000  -0.59874  -1.05445  -0.19922   0.00000
 243        5PX         0.00000  -0.06141  -0.04192   0.00885   0.00000
 244        5PY        -0.03874   0.00000   0.00000   0.00000   0.02994
 245        5PZ         0.00000  -0.01602  -0.04053   0.04229   0.00000
 246        6PX         0.00000  -0.06734  -0.05097   0.00752   0.00000
 247        6PY        -0.03443   0.00000   0.00000   0.00000   0.04301
 248        6PZ         0.00000  -0.01673  -0.05658   0.06564   0.00000
 249        7PX         0.00000   0.03931   0.16614   0.13865   0.00000
 250        7PY        -0.12559   0.00000   0.00000   0.00000   0.08363
 251        7PZ         0.00000   0.17246   0.11212   0.07936   0.00000
 252        8D 0        0.00000   0.00306  -0.00205   0.00001   0.00000
 253        8D+1        0.00000   0.00067   0.00050   0.00059   0.00000
 254        8D-1        0.00008   0.00000   0.00000   0.00000   0.00181
 255        8D+2        0.00000  -0.00039   0.00035   0.00183   0.00000
 256        8D-2        0.00079   0.00000   0.00000   0.00000   0.00397
 257        9D 0        0.00000  -0.00128  -0.00387   0.00122   0.00000
 258        9D+1        0.00000  -0.02314  -0.01299  -0.00610   0.00000
 259        9D-1        0.00169   0.00000   0.00000   0.00000   0.00415
 260        9D+2        0.00000  -0.00713  -0.01013  -0.00640   0.00000
 261        9D-2       -0.00070   0.00000   0.00000   0.00000   0.00475
 262       10F 0        0.00000  -0.00075  -0.00011  -0.00034   0.00000
 263       10F+1        0.00000   0.00065   0.00042   0.00099   0.00000
 264       10F-1        0.00012   0.00000   0.00000   0.00000   0.00052
 265       10F+2        0.00000   0.00062   0.00081   0.00065   0.00000
 266       10F-2       -0.00022   0.00000   0.00000   0.00000  -0.00011
 267       10F+3        0.00000  -0.00012   0.00057  -0.00008   0.00000
 268       10F-3        0.00003   0.00000   0.00000   0.00000  -0.00076
 269 13  F  1S          0.00000   0.01272  -0.03989   0.01126   0.00000
 270        2S          0.00000   0.05618  -0.03708  -0.02484   0.00000
 271        3S          0.00000   0.00459   0.01188  -0.00751   0.00000
 272        4S          0.00000  -0.59874   1.05445  -0.19922   0.00000
 273        5PX         0.00000   0.06141  -0.04192  -0.00885   0.00000
 274        5PY        -0.03874   0.00000   0.00000   0.00000   0.02994
 275        5PZ         0.00000  -0.01602   0.04053   0.04229   0.00000
 276        6PX         0.00000   0.06734  -0.05097  -0.00752   0.00000
 277        6PY        -0.03443   0.00000   0.00000   0.00000   0.04301
 278        6PZ         0.00000  -0.01673   0.05658   0.06564   0.00000
 279        7PX         0.00000  -0.03931   0.16614  -0.13865   0.00000
 280        7PY        -0.12559   0.00000   0.00000   0.00000   0.08363
 281        7PZ         0.00000   0.17246  -0.11212   0.07936   0.00000
 282        8D 0        0.00000   0.00306   0.00205   0.00001   0.00000
 283        8D+1        0.00000  -0.00067   0.00050  -0.00059   0.00000
 284        8D-1        0.00008   0.00000   0.00000   0.00000   0.00181
 285        8D+2        0.00000  -0.00039  -0.00035   0.00183   0.00000
 286        8D-2       -0.00079   0.00000   0.00000   0.00000  -0.00397
 287        9D 0        0.00000  -0.00128   0.00387   0.00122   0.00000
 288        9D+1        0.00000   0.02314  -0.01299   0.00610   0.00000
 289        9D-1        0.00169   0.00000   0.00000   0.00000   0.00415
 290        9D+2        0.00000  -0.00713   0.01013  -0.00640   0.00000
 291        9D-2        0.00070   0.00000   0.00000   0.00000  -0.00475
 292       10F 0        0.00000  -0.00075   0.00011  -0.00034   0.00000
 293       10F+1        0.00000  -0.00065   0.00042  -0.00099   0.00000
 294       10F-1        0.00012   0.00000   0.00000   0.00000   0.00052
 295       10F+2        0.00000   0.00062  -0.00081   0.00065   0.00000
 296       10F-2        0.00022   0.00000   0.00000   0.00000   0.00011
 297       10F+3        0.00000   0.00012   0.00057   0.00008   0.00000
 298       10F-3        0.00003   0.00000   0.00000   0.00000  -0.00076
                          51        52        53        54        55
                        (A2)--V   (B1)--V   (B2)--V   (A1)--V   (A1)--V
     Eigenvalues --     0.44724   0.46387   0.51309   0.51636   0.53561
   1 1   C  1S          0.00000   0.00000   0.00581   0.01248  -0.01319
   2        2S          0.00000   0.00000  -0.04143  -0.00343   0.12544
   3        3S          0.00000   0.00000   0.02580   0.00269   0.04899
   4        4S          0.00000   0.00000  -4.80207   0.03258  -1.12556
   5        5PX         0.00136   0.03268   0.00000   0.00000   0.00000
   6        5PY         0.00000   0.00000   0.02669   0.02243  -0.05036
   7        5PZ         0.00000   0.00000   0.10334   0.06592   0.08077
   8        6PX         0.02097   0.04136   0.00000   0.00000   0.00000
   9        6PY         0.00000   0.00000   0.14088   0.03453  -0.15842
  10        6PZ         0.00000   0.00000   0.14256   0.26257   0.05213
  11        7PX         0.21623  -0.36339   0.00000   0.00000   0.00000
  12        7PY         0.00000   0.00000  -0.04114   0.96600   1.50730
  13        7PZ         0.00000   0.00000   2.90948   0.23770  -1.64919
  14        8D 0        0.00000   0.00000   0.01532   0.00392  -0.00358
  15        8D+1        0.01889  -0.01086   0.00000   0.00000   0.00000
  16        8D-1        0.00000   0.00000   0.00935  -0.00682  -0.01165
  17        8D+2        0.00000   0.00000   0.01310  -0.01610  -0.02140
  18        8D-2       -0.02540   0.00131   0.00000   0.00000   0.00000
  19        9D 0        0.00000   0.00000   0.01401  -0.06336   0.02339
  20        9D+1       -0.09928   0.14777   0.00000   0.00000   0.00000
  21        9D-1        0.00000   0.00000  -0.02805  -0.03837   0.22590
  22        9D+2        0.00000   0.00000  -0.07141   0.15234   0.12193
  23        9D-2        0.03364   0.04273   0.00000   0.00000   0.00000
  24       10F 0        0.00000   0.00000   0.00017  -0.00149   0.00346
  25       10F+1       -0.00579  -0.00075   0.00000   0.00000   0.00000
  26       10F-1        0.00000   0.00000   0.00936   0.00649   0.00745
  27       10F+2        0.00000   0.00000  -0.00468  -0.00720   0.01471
  28       10F-2       -0.00350   0.00255   0.00000   0.00000   0.00000
  29       10F+3       -0.00931  -0.00309   0.00000   0.00000   0.00000
  30       10F-3        0.00000   0.00000  -0.01700   0.00711  -0.00731
  31 2   H  1S         -0.05307  -0.00335  -0.02283  -0.01826  -0.00377
  32        2S         -0.42027   0.16613   0.34235  -0.24843  -0.00607
  33        3S          0.26989  -0.48191  -0.01710  -0.35747  -0.56071
  34        4PX         0.00870  -0.00633  -0.00182   0.00276  -0.00082
  35        4PY         0.00829  -0.00022  -0.00669   0.00618   0.00097
  36        4PZ        -0.00379   0.00172   0.00793   0.00036  -0.00749
  37        5PX         0.00118   0.03851  -0.05162  -0.03667  -0.07495
  38        5PY        -0.07309  -0.02467  -0.05967   0.04160   0.01079
  39        5PZ         0.11557  -0.07059  -0.02060   0.02225   0.03091
  40        6D 0       -0.00370   0.00114  -0.00124  -0.00002  -0.00480
  41        6D+1       -0.00501   0.00454  -0.00213  -0.00011   0.00384
  42        6D-1       -0.00729   0.00682   0.00111  -0.00073  -0.00120
  43        6D+2       -0.00446  -0.00271  -0.00350   0.00835   0.00795
  44        6D-2       -0.00001  -0.00102   0.00345  -0.00375   0.00216
  45 3   H  1S          0.05307   0.00335  -0.02283  -0.01826  -0.00377
  46        2S          0.42027  -0.16613   0.34235  -0.24843  -0.00607
  47        3S         -0.26989   0.48191  -0.01710  -0.35747  -0.56071
  48        4PX         0.00870  -0.00633   0.00182  -0.00276   0.00082
  49        4PY        -0.00829   0.00022  -0.00669   0.00618   0.00097
  50        4PZ         0.00379  -0.00172   0.00793   0.00036  -0.00749
  51        5PX         0.00118   0.03851   0.05162   0.03667   0.07495
  52        5PY         0.07309   0.02467  -0.05967   0.04160   0.01079
  53        5PZ        -0.11557   0.07059  -0.02060   0.02225   0.03091
  54        6D 0        0.00370  -0.00114  -0.00124  -0.00002  -0.00480
  55        6D+1       -0.00501   0.00454   0.00213   0.00011  -0.00384
  56        6D-1        0.00729  -0.00682   0.00111  -0.00073  -0.00120
  57        6D+2        0.00446   0.00271  -0.00350   0.00835   0.00795
  58        6D-2       -0.00001  -0.00102  -0.00345   0.00375  -0.00216
  59 4   H  1S         -0.05307   0.00335   0.02283  -0.01826  -0.00377
  60        2S         -0.42027  -0.16613  -0.34235  -0.24843  -0.00607
  61        3S          0.26989   0.48191   0.01710  -0.35747  -0.56071
  62        4PX        -0.00870  -0.00633  -0.00182  -0.00276   0.00082
  63        4PY        -0.00829  -0.00022  -0.00669  -0.00618  -0.00097
  64        4PZ        -0.00379  -0.00172  -0.00793   0.00036  -0.00749
  65        5PX        -0.00118   0.03851  -0.05162   0.03667   0.07495
  66        5PY         0.07309  -0.02467  -0.05967  -0.04160  -0.01079
  67        5PZ         0.11557   0.07059   0.02060   0.02225   0.03091
  68        6D 0       -0.00370  -0.00114   0.00124  -0.00002  -0.00480
  69        6D+1        0.00501   0.00454  -0.00213   0.00011  -0.00384
  70        6D-1        0.00729   0.00682   0.00111   0.00073   0.00120
  71        6D+2       -0.00446   0.00271   0.00350   0.00835   0.00795
  72        6D-2       -0.00001   0.00102  -0.00345  -0.00375   0.00216
  73 5   H  1S          0.05307  -0.00335   0.02283  -0.01826  -0.00377
  74        2S          0.42027   0.16613  -0.34235  -0.24843  -0.00607
  75        3S         -0.26989  -0.48191   0.01710  -0.35747  -0.56071
  76        4PX        -0.00870  -0.00633   0.00182   0.00276  -0.00082
  77        4PY         0.00829   0.00022  -0.00669  -0.00618  -0.00097
  78        4PZ         0.00379   0.00172  -0.00793   0.00036  -0.00749
  79        5PX        -0.00118   0.03851   0.05162  -0.03667  -0.07495
  80        5PY        -0.07309   0.02467  -0.05967  -0.04160  -0.01079
  81        5PZ        -0.11557  -0.07059   0.02060   0.02225   0.03091
  82        6D 0        0.00370   0.00114   0.00124  -0.00002  -0.00480
  83        6D+1        0.00501   0.00454   0.00213  -0.00011   0.00384
  84        6D-1       -0.00729  -0.00682   0.00111   0.00073   0.00120
  85        6D+2        0.00446  -0.00271   0.00350   0.00835   0.00795
  86        6D-2       -0.00001   0.00102   0.00345   0.00375  -0.00216
  87 6   C  1S          0.00000   0.00000  -0.00581   0.01248  -0.01319
  88        2S          0.00000   0.00000   0.04143  -0.00343   0.12544
  89        3S          0.00000   0.00000  -0.02580   0.00269   0.04899
  90        4S          0.00000   0.00000   4.80207   0.03258  -1.12556
  91        5PX        -0.00136   0.03268   0.00000   0.00000   0.00000
  92        5PY         0.00000   0.00000   0.02669  -0.02243   0.05036
  93        5PZ         0.00000   0.00000  -0.10334   0.06592   0.08077
  94        6PX        -0.02097   0.04136   0.00000   0.00000   0.00000
  95        6PY         0.00000   0.00000   0.14088  -0.03453   0.15842
  96        6PZ         0.00000   0.00000  -0.14256   0.26257   0.05213
  97        7PX        -0.21623  -0.36339   0.00000   0.00000   0.00000
  98        7PY         0.00000   0.00000  -0.04114  -0.96600  -1.50730
  99        7PZ         0.00000   0.00000  -2.90948   0.23770  -1.64919
 100        8D 0        0.00000   0.00000  -0.01532   0.00392  -0.00358
 101        8D+1       -0.01889  -0.01086   0.00000   0.00000   0.00000
 102        8D-1        0.00000   0.00000   0.00935   0.00682   0.01165
 103        8D+2        0.00000   0.00000  -0.01310  -0.01610  -0.02140
 104        8D-2       -0.02540  -0.00131   0.00000   0.00000   0.00000
 105        9D 0        0.00000   0.00000  -0.01401  -0.06336   0.02339
 106        9D+1        0.09928   0.14777   0.00000   0.00000   0.00000
 107        9D-1        0.00000   0.00000  -0.02805   0.03837  -0.22590
 108        9D+2        0.00000   0.00000   0.07141   0.15234   0.12193
 109        9D-2        0.03364  -0.04273   0.00000   0.00000   0.00000
 110       10F 0        0.00000   0.00000  -0.00017  -0.00149   0.00346
 111       10F+1        0.00579  -0.00075   0.00000   0.00000   0.00000
 112       10F-1        0.00000   0.00000   0.00936  -0.00649  -0.00745
 113       10F+2        0.00000   0.00000   0.00468  -0.00720   0.01471
 114       10F-2       -0.00350  -0.00255   0.00000   0.00000   0.00000
 115       10F+3        0.00931  -0.00309   0.00000   0.00000   0.00000
 116       10F-3        0.00000   0.00000  -0.01700  -0.00711   0.00731
 117 7   C  1S          0.00000   0.00000   0.02348  -0.00760   0.04173
 118        2S          0.00000   0.00000  -0.02291  -0.13261  -0.06790
 119        3S          0.00000   0.00000   0.00092  -0.07816  -0.01074
 120        4S          0.00000   0.00000   2.80861   2.27773   0.01527
 121        5PX        -0.02033  -0.11993   0.00000   0.00000   0.00000
 122        5PY         0.00000   0.00000   0.04659  -0.05952   0.02354
 123        5PZ         0.00000   0.00000  -0.03504  -0.00071   0.03931
 124        6PX        -0.10027  -0.47282   0.00000   0.00000   0.00000
 125        6PY         0.00000   0.00000   0.23533  -0.55048  -0.03754
 126        6PZ         0.00000   0.00000   0.01354  -0.57751  -0.20449
 127        7PX         0.34818   0.88192   0.00000   0.00000   0.00000
 128        7PY         0.00000   0.00000   5.64996   0.34270   0.15531
 129        7PZ         0.00000   0.00000  -3.31801   0.66218  -1.09886
 130        8D 0        0.00000   0.00000   0.01580   0.00592   0.01202
 131        8D+1       -0.00534  -0.00771   0.00000   0.00000   0.00000
 132        8D-1        0.00000   0.00000  -0.00664   0.00364   0.01300
 133        8D+2        0.00000   0.00000   0.00569   0.01505  -0.00047
 134        8D-2        0.00547   0.00245   0.00000   0.00000   0.00000
 135        9D 0        0.00000   0.00000  -0.07728   0.20834   0.14215
 136        9D+1        0.02309  -0.00586   0.00000   0.00000   0.00000
 137        9D-1        0.00000   0.00000   0.09671   0.27548   0.27489
 138        9D+2        0.00000   0.00000  -0.10004  -0.05081   0.00366
 139        9D-2       -0.09822  -0.14737   0.00000   0.00000   0.00000
 140       10F 0        0.00000   0.00000  -0.01080  -0.00952  -0.00738
 141       10F+1        0.00316   0.00687   0.00000   0.00000   0.00000
 142       10F-1        0.00000   0.00000   0.00819  -0.06359  -0.00852
 143       10F+2        0.00000   0.00000  -0.00932   0.01336   0.00999
 144       10F-2       -0.00530  -0.01095   0.00000   0.00000   0.00000
 145       10F+3        0.00111  -0.00920   0.00000   0.00000   0.00000
 146       10F-3        0.00000   0.00000  -0.00837  -0.00094   0.00602
 147 8   H  1S          0.00000   0.00000   0.03740  -0.04326   0.04646
 148        2S          0.00000   0.00000   0.19909  -1.48757  -0.37297
 149        3S          0.00000   0.00000  -0.05920   0.20713  -1.23183
 150        4PX         0.00276   0.00387   0.00000   0.00000   0.00000
 151        4PY         0.00000   0.00000   0.02217  -0.01140   0.00632
 152        4PZ         0.00000   0.00000  -0.00379  -0.03109   0.00231
 153        5PX        -0.02408  -0.01443   0.00000   0.00000   0.00000
 154        5PY         0.00000   0.00000  -0.06990  -0.28123  -0.21379
 155        5PZ         0.00000   0.00000   0.03311  -0.36084  -0.30354
 156        6D 0        0.00000   0.00000   0.00612  -0.03081  -0.01241
 157        6D+1       -0.00176  -0.00296   0.00000   0.00000   0.00000
 158        6D-1        0.00000   0.00000   0.00381  -0.04059  -0.01593
 159        6D+2        0.00000   0.00000  -0.00292   0.01539   0.00611
 160        6D-2        0.00190   0.00253   0.00000   0.00000   0.00000
 161 9   C  1S          0.00000   0.00000  -0.02348  -0.00760   0.04173
 162        2S          0.00000   0.00000   0.02291  -0.13261  -0.06790
 163        3S          0.00000   0.00000  -0.00092  -0.07816  -0.01074
 164        4S          0.00000   0.00000  -2.80861   2.27773   0.01527
 165        5PX         0.02033  -0.11993   0.00000   0.00000   0.00000
 166        5PY         0.00000   0.00000   0.04659   0.05952  -0.02354
 167        5PZ         0.00000   0.00000   0.03504  -0.00071   0.03931
 168        6PX         0.10027  -0.47282   0.00000   0.00000   0.00000
 169        6PY         0.00000   0.00000   0.23533   0.55048   0.03754
 170        6PZ         0.00000   0.00000  -0.01354  -0.57751  -0.20449
 171        7PX        -0.34818   0.88192   0.00000   0.00000   0.00000
 172        7PY         0.00000   0.00000   5.64996  -0.34270  -0.15531
 173        7PZ         0.00000   0.00000   3.31801   0.66218  -1.09886
 174        8D 0        0.00000   0.00000  -0.01580   0.00592   0.01202
 175        8D+1        0.00534  -0.00771   0.00000   0.00000   0.00000
 176        8D-1        0.00000   0.00000  -0.00664  -0.00364  -0.01300
 177        8D+2        0.00000   0.00000  -0.00569   0.01505  -0.00047
 178        8D-2        0.00547  -0.00245   0.00000   0.00000   0.00000
 179        9D 0        0.00000   0.00000   0.07728   0.20834   0.14215
 180        9D+1       -0.02309  -0.00586   0.00000   0.00000   0.00000
 181        9D-1        0.00000   0.00000   0.09671  -0.27548  -0.27489
 182        9D+2        0.00000   0.00000   0.10004  -0.05081   0.00366
 183        9D-2       -0.09822   0.14737   0.00000   0.00000   0.00000
 184       10F 0        0.00000   0.00000   0.01080  -0.00952  -0.00738
 185       10F+1       -0.00316   0.00687   0.00000   0.00000   0.00000
 186       10F-1        0.00000   0.00000   0.00819   0.06359   0.00852
 187       10F+2        0.00000   0.00000   0.00932   0.01336   0.00999
 188       10F-2       -0.00530   0.01095   0.00000   0.00000   0.00000
 189       10F+3       -0.00111  -0.00920   0.00000   0.00000   0.00000
 190       10F-3        0.00000   0.00000  -0.00837   0.00094  -0.00602
 191 10  H  1S          0.00000   0.00000  -0.03740  -0.04326   0.04646
 192        2S          0.00000   0.00000  -0.19909  -1.48757  -0.37297
 193        3S          0.00000   0.00000   0.05920   0.20713  -1.23183
 194        4PX        -0.00276   0.00387   0.00000   0.00000   0.00000
 195        4PY         0.00000   0.00000   0.02217   0.01140  -0.00632
 196        4PZ         0.00000   0.00000   0.00379  -0.03109   0.00231
 197        5PX         0.02408  -0.01443   0.00000   0.00000   0.00000
 198        5PY         0.00000   0.00000  -0.06990   0.28123   0.21379
 199        5PZ         0.00000   0.00000  -0.03311  -0.36084  -0.30354
 200        6D 0        0.00000   0.00000  -0.00612  -0.03081  -0.01241
 201        6D+1        0.00176  -0.00296   0.00000   0.00000   0.00000
 202        6D-1        0.00000   0.00000   0.00381   0.04059   0.01593
 203        6D+2        0.00000   0.00000   0.00292   0.01539   0.00611
 204        6D-2        0.00190  -0.00253   0.00000   0.00000   0.00000
 205 11  Si 1S          0.00000   0.00000   0.00000  -0.00945  -0.01853
 206        2S          0.00000   0.00000   0.00000   0.10497   0.08124
 207        3S          0.00000   0.00000   0.00000   0.09375  -0.19667
 208        4S          0.00000   0.00000   0.00000   0.13408  -0.29030
 209        5S          0.00000   0.00000   0.00000  -0.73012   5.78405
 210        6PX         0.00000   0.02638   0.00000   0.00000   0.00000
 211        6PY         0.00000   0.00000   0.08386   0.00000   0.00000
 212        6PZ         0.00000   0.00000   0.00000   0.07009  -0.07534
 213        7PX         0.00000  -0.10708   0.00000   0.00000   0.00000
 214        7PY         0.00000   0.00000  -0.57421   0.00000   0.00000
 215        7PZ         0.00000   0.00000   0.00000  -0.69126  -0.28871
 216        8PX         0.00000  -0.01060   0.00000   0.00000   0.00000
 217        8PY         0.00000   0.00000  -0.03930   0.00000   0.00000
 218        8PZ         0.00000   0.00000   0.00000  -0.03668   0.05892
 219        9PX         0.00000   0.56456   0.00000   0.00000   0.00000
 220        9PY         0.00000   0.00000  -0.56008   0.00000   0.00000
 221        9PZ         0.00000   0.00000   0.00000   1.12930  -2.37880
 222       10D 0        0.00000   0.00000   0.00000  -0.52527   0.90816
 223       10D+1        0.00000   0.28724   0.00000   0.00000   0.00000
 224       10D-1        0.00000   0.00000  -0.61151   0.00000   0.00000
 225       10D+2        0.00000   0.00000   0.00000   0.36015  -0.84897
 226       10D-2        0.79633   0.00000   0.00000   0.00000   0.00000
 227       11D 0        0.00000   0.00000   0.00000   0.02644   0.12711
 228       11D+1        0.00000   0.03080   0.00000   0.00000   0.00000
 229       11D-1        0.00000   0.00000   0.01630   0.00000   0.00000
 230       11D+2        0.00000   0.00000   0.00000   0.01260  -0.07825
 231       11D-2        0.12257   0.00000   0.00000   0.00000   0.00000
 232       12F 0        0.00000   0.00000   0.00000   0.04840   0.03322
 233       12F+1        0.00000  -0.00383   0.00000   0.00000   0.00000
 234       12F-1        0.00000   0.00000  -0.00804   0.00000   0.00000
 235       12F+2        0.00000   0.00000   0.00000  -0.01152   0.15406
 236       12F-2       -0.07842   0.00000   0.00000   0.00000   0.00000
 237       12F+3        0.00000   0.04681   0.00000   0.00000   0.00000
 238       12F-3        0.00000   0.00000  -0.03574   0.00000   0.00000
 239 12  F  1S          0.00000   0.00749   0.00000  -0.00866   0.00652
 240        2S          0.00000   0.02502   0.00000   0.06691  -0.00066
 241        3S          0.00000   0.00067   0.00000   0.01256  -0.00358
 242        4S          0.00000  -0.28822   0.00000  -0.05510  -0.12904
 243        5PX         0.00000  -0.01166   0.00000  -0.04879   0.02746
 244        5PY        -0.07860   0.00000   0.03951   0.00000   0.00000
 245        5PZ         0.00000  -0.01736   0.00000  -0.02797  -0.06824
 246        6PX         0.00000  -0.01137   0.00000  -0.05593   0.02881
 247        6PY        -0.10372   0.00000   0.04557   0.00000   0.00000
 248        6PZ         0.00000  -0.01949   0.00000  -0.06071  -0.08630
 249        7PX         0.00000   0.02302   0.00000  -0.20965   0.19173
 250        7PY        -0.17052   0.00000   0.15073   0.00000   0.00000
 251        7PZ         0.00000   0.01782   0.00000   0.04162  -0.15601
 252        8D 0        0.00000  -0.00001   0.00000   0.00278  -0.00487
 253        8D+1        0.00000  -0.00009   0.00000  -0.00169  -0.00242
 254        8D-1       -0.00278   0.00000   0.00087   0.00000   0.00000
 255        8D+2        0.00000  -0.00017   0.00000  -0.00323   0.00273
 256        8D-2       -0.00133   0.00000   0.00340   0.00000   0.00000
 257        9D 0        0.00000  -0.00375   0.00000   0.00268  -0.00493
 258        9D+1        0.00000  -0.00273   0.00000   0.00756  -0.01076
 259        9D-1       -0.01126   0.00000  -0.00500   0.00000   0.00000
 260        9D+2        0.00000   0.00108   0.00000   0.00371   0.00207
 261        9D-2        0.00077   0.00000   0.00536   0.00000   0.00000
 262       10F 0        0.00000   0.00021   0.00000   0.00006   0.00006
 263       10F+1        0.00000   0.00036   0.00000  -0.00105   0.00019
 264       10F-1        0.00048   0.00000   0.00019   0.00000   0.00000
 265       10F+2        0.00000   0.00005   0.00000  -0.00060  -0.00039
 266       10F-2        0.00027   0.00000   0.00010   0.00000   0.00000
 267       10F+3        0.00000   0.00008   0.00000  -0.00006  -0.00008
 268       10F-3       -0.00014   0.00000  -0.00046   0.00000   0.00000
 269 13  F  1S          0.00000  -0.00749   0.00000  -0.00866   0.00652
 270        2S          0.00000  -0.02502   0.00000   0.06691  -0.00066
 271        3S          0.00000  -0.00067   0.00000   0.01256  -0.00358
 272        4S          0.00000   0.28822   0.00000  -0.05510  -0.12904
 273        5PX         0.00000  -0.01166   0.00000   0.04879  -0.02746
 274        5PY         0.07860   0.00000   0.03951   0.00000   0.00000
 275        5PZ         0.00000   0.01736   0.00000  -0.02797  -0.06824
 276        6PX         0.00000  -0.01137   0.00000   0.05593  -0.02881
 277        6PY         0.10372   0.00000   0.04557   0.00000   0.00000
 278        6PZ         0.00000   0.01949   0.00000  -0.06071  -0.08630
 279        7PX         0.00000   0.02302   0.00000   0.20965  -0.19173
 280        7PY         0.17052   0.00000   0.15073   0.00000   0.00000
 281        7PZ         0.00000  -0.01782   0.00000   0.04162  -0.15601
 282        8D 0        0.00000   0.00001   0.00000   0.00278  -0.00487
 283        8D+1        0.00000  -0.00009   0.00000   0.00169   0.00242
 284        8D-1        0.00278   0.00000   0.00087   0.00000   0.00000
 285        8D+2        0.00000   0.00017   0.00000  -0.00323   0.00273
 286        8D-2       -0.00133   0.00000  -0.00340   0.00000   0.00000
 287        9D 0        0.00000   0.00375   0.00000   0.00268  -0.00493
 288        9D+1        0.00000  -0.00273   0.00000  -0.00756   0.01076
 289        9D-1        0.01126   0.00000  -0.00500   0.00000   0.00000
 290        9D+2        0.00000  -0.00108   0.00000   0.00371   0.00207
 291        9D-2        0.00077   0.00000  -0.00536   0.00000   0.00000
 292       10F 0        0.00000  -0.00021   0.00000   0.00006   0.00006
 293       10F+1        0.00000   0.00036   0.00000   0.00105  -0.00019
 294       10F-1       -0.00048   0.00000   0.00019   0.00000   0.00000
 295       10F+2        0.00000  -0.00005   0.00000  -0.00060  -0.00039
 296       10F-2        0.00027   0.00000  -0.00010   0.00000   0.00000
 297       10F+3        0.00000   0.00008   0.00000   0.00006   0.00008
 298       10F-3        0.00014   0.00000  -0.00046   0.00000   0.00000
                          56        57        58        59        60
                        (A1)--V   (B1)--V   (A2)--V   (B2)--V   (B1)--V
     Eigenvalues --     0.54812   0.57170   0.58252   0.60777   0.61253
   1 1   C  1S         -0.06584   0.00000   0.00000  -0.00372   0.00000
   2        2S          0.22256   0.00000   0.00000   0.04041   0.00000
   3        3S          0.10015   0.00000   0.00000   0.01486   0.00000
   4        4S         -3.08289   0.00000   0.00000   0.30585   0.00000
   5        5PX         0.00000  -0.09229   0.01120   0.00000  -0.19459
   6        5PY        -0.07404   0.00000   0.00000  -0.05866   0.00000
   7        5PZ        -0.03350   0.00000   0.00000  -0.11666   0.00000
   8        6PX         0.00000   0.50299  -0.18281   0.00000   0.22239
   9        6PY        -0.29650   0.00000   0.00000   0.11889   0.00000
  10        6PZ         0.01718   0.00000   0.00000  -0.19927   0.00000
  11        7PX         0.00000   2.77173   0.14955   0.00000   2.64177
  12        7PY         1.91161   0.00000   0.00000  -0.58755   0.00000
  13        7PZ        -0.12820   0.00000   0.00000   2.31595   0.00000
  14        8D 0        0.01101   0.00000   0.00000   0.00354   0.00000
  15        8D+1        0.00000  -0.00484   0.00053   0.00000   0.00890
  16        8D-1       -0.00805   0.00000   0.00000   0.01334   0.00000
  17        8D+2       -0.01057   0.00000   0.00000   0.01224   0.00000
  18        8D-2        0.00000   0.01661   0.00098   0.00000   0.03440
  19        9D 0        0.06678   0.00000   0.00000  -0.32897   0.00000
  20        9D+1        0.00000   0.02391  -0.15622   0.00000   0.13199
  21        9D-1       -0.09094   0.00000   0.00000  -0.14990   0.00000
  22        9D+2        0.03008   0.00000   0.00000  -0.03192   0.00000
  23        9D-2        0.00000   0.67823  -0.28556   0.00000   0.47941
  24       10F 0        0.00813   0.00000   0.00000   0.01454   0.00000
  25       10F+1        0.00000  -0.04468   0.01255   0.00000  -0.02135
  26       10F-1        0.02985   0.00000   0.00000   0.00970   0.00000
  27       10F+2       -0.00058   0.00000   0.00000  -0.00662   0.00000
  28       10F-2        0.00000   0.01950  -0.00297   0.00000   0.00582
  29       10F+3        0.00000  -0.01845   0.00823   0.00000  -0.00854
  30       10F-3       -0.02838   0.00000   0.00000   0.01686   0.00000
  31 2   H  1S         -0.04271   0.02062   0.00392   0.01122   0.06083
  32        2S          0.06540  -1.35425   0.25906  -0.21817  -0.69400
  33        3S         -0.35529  -1.26534   0.44174   0.06769  -1.56592
  34        4PX        -0.00538   0.01350   0.00014  -0.00047   0.00383
  35        4PY         0.00559   0.00234  -0.00266  -0.00218  -0.00693
  36        4PZ        -0.00241   0.00653  -0.00116   0.00753  -0.00713
  37        5PX        -0.16372   0.39445  -0.16024   0.15466   0.33619
  38        5PY        -0.18232   0.31445  -0.05318   0.06517   0.37688
  39        5PZ        -0.00501  -0.02668   0.01874  -0.01823   0.12305
  40        6D 0       -0.00924   0.01053  -0.00222   0.00812   0.01213
  41        6D+1        0.00234  -0.00515  -0.00104  -0.00613  -0.00271
  42        6D-1        0.00111   0.00165  -0.00149  -0.00047  -0.00522
  43        6D+2        0.00405  -0.00965   0.00610  -0.00560  -0.00270
  44        6D-2        0.01443  -0.03232   0.00983  -0.00343  -0.02578
  45 3   H  1S         -0.04271  -0.02062  -0.00392   0.01122  -0.06083
  46        2S          0.06540   1.35425  -0.25906  -0.21817   0.69400
  47        3S         -0.35529   1.26534  -0.44174   0.06769   1.56592
  48        4PX         0.00538   0.01350   0.00014   0.00047   0.00383
  49        4PY         0.00559  -0.00234   0.00266  -0.00218   0.00693
  50        4PZ        -0.00241  -0.00653   0.00116   0.00753   0.00713
  51        5PX         0.16372   0.39445  -0.16024  -0.15466   0.33619
  52        5PY        -0.18232  -0.31445   0.05318   0.06517  -0.37688
  53        5PZ        -0.00501   0.02668  -0.01874  -0.01823  -0.12305
  54        6D 0       -0.00924  -0.01053   0.00222   0.00812  -0.01213
  55        6D+1       -0.00234  -0.00515  -0.00104   0.00613  -0.00271
  56        6D-1        0.00111  -0.00165   0.00149  -0.00047   0.00522
  57        6D+2        0.00405   0.00965  -0.00610  -0.00560   0.00270
  58        6D-2       -0.01443  -0.03232   0.00983   0.00343  -0.02578
  59 4   H  1S         -0.04271  -0.02062   0.00392  -0.01122  -0.06083
  60        2S          0.06540   1.35425   0.25906   0.21817   0.69400
  61        3S         -0.35529   1.26534   0.44174  -0.06769   1.56592
  62        4PX         0.00538   0.01350  -0.00014  -0.00047   0.00383
  63        4PY        -0.00559   0.00234   0.00266  -0.00218  -0.00693
  64        4PZ        -0.00241  -0.00653  -0.00116  -0.00753   0.00713
  65        5PX         0.16372   0.39445   0.16024   0.15466   0.33619
  66        5PY         0.18232   0.31445   0.05318   0.06517   0.37688
  67        5PZ        -0.00501   0.02668   0.01874   0.01823  -0.12305
  68        6D 0       -0.00924  -0.01053  -0.00222  -0.00812  -0.01213
  69        6D+1       -0.00234  -0.00515   0.00104  -0.00613  -0.00271
  70        6D-1       -0.00111   0.00165   0.00149  -0.00047  -0.00522
  71        6D+2        0.00405   0.00965   0.00610   0.00560   0.00270
  72        6D-2        0.01443   0.03232   0.00983   0.00343   0.02578
  73 5   H  1S         -0.04271   0.02062  -0.00392  -0.01122   0.06083
  74        2S          0.06540  -1.35425  -0.25906   0.21817  -0.69400
  75        3S         -0.35529  -1.26534  -0.44174  -0.06769  -1.56592
  76        4PX        -0.00538   0.01350  -0.00014   0.00047   0.00383
  77        4PY        -0.00559  -0.00234  -0.00266  -0.00218   0.00693
  78        4PZ        -0.00241   0.00653   0.00116  -0.00753  -0.00713
  79        5PX        -0.16372   0.39445   0.16024  -0.15466   0.33619
  80        5PY         0.18232  -0.31445  -0.05318   0.06517  -0.37688
  81        5PZ        -0.00501  -0.02668  -0.01874   0.01823   0.12305
  82        6D 0       -0.00924   0.01053   0.00222  -0.00812   0.01213
  83        6D+1        0.00234  -0.00515   0.00104   0.00613  -0.00271
  84        6D-1       -0.00111  -0.00165  -0.00149  -0.00047   0.00522
  85        6D+2        0.00405  -0.00965  -0.00610   0.00560  -0.00270
  86        6D-2       -0.01443   0.03232   0.00983  -0.00343   0.02578
  87 6   C  1S         -0.06584   0.00000   0.00000   0.00372   0.00000
  88        2S          0.22256   0.00000   0.00000  -0.04041   0.00000
  89        3S          0.10015   0.00000   0.00000  -0.01486   0.00000
  90        4S         -3.08289   0.00000   0.00000  -0.30585   0.00000
  91        5PX         0.00000  -0.09229  -0.01120   0.00000  -0.19459
  92        5PY         0.07404   0.00000   0.00000  -0.05866   0.00000
  93        5PZ        -0.03350   0.00000   0.00000   0.11666   0.00000
  94        6PX         0.00000   0.50299   0.18281   0.00000   0.22239
  95        6PY         0.29650   0.00000   0.00000   0.11889   0.00000
  96        6PZ         0.01718   0.00000   0.00000   0.19927   0.00000
  97        7PX         0.00000   2.77173  -0.14955   0.00000   2.64177
  98        7PY        -1.91161   0.00000   0.00000  -0.58755   0.00000
  99        7PZ        -0.12820   0.00000   0.00000  -2.31595   0.00000
 100        8D 0        0.01101   0.00000   0.00000  -0.00354   0.00000
 101        8D+1        0.00000  -0.00484  -0.00053   0.00000   0.00890
 102        8D-1        0.00805   0.00000   0.00000   0.01334   0.00000
 103        8D+2       -0.01057   0.00000   0.00000  -0.01224   0.00000
 104        8D-2        0.00000  -0.01661   0.00098   0.00000  -0.03440
 105        9D 0        0.06678   0.00000   0.00000   0.32897   0.00000
 106        9D+1        0.00000   0.02391   0.15622   0.00000   0.13199
 107        9D-1        0.09094   0.00000   0.00000  -0.14990   0.00000
 108        9D+2        0.03008   0.00000   0.00000   0.03192   0.00000
 109        9D-2        0.00000  -0.67823  -0.28556   0.00000  -0.47941
 110       10F 0        0.00813   0.00000   0.00000  -0.01454   0.00000
 111       10F+1        0.00000  -0.04468  -0.01255   0.00000  -0.02135
 112       10F-1       -0.02985   0.00000   0.00000   0.00970   0.00000
 113       10F+2       -0.00058   0.00000   0.00000   0.00662   0.00000
 114       10F-2        0.00000  -0.01950  -0.00297   0.00000  -0.00582
 115       10F+3        0.00000  -0.01845  -0.00823   0.00000  -0.00854
 116       10F-3        0.02838   0.00000   0.00000   0.01686   0.00000
 117 7   C  1S         -0.00924   0.00000   0.00000  -0.08706   0.00000
 118        2S          0.04916   0.00000   0.00000   0.16810   0.00000
 119        3S          0.00720   0.00000   0.00000   0.01994   0.00000
 120        4S         -0.69519   0.00000   0.00000   4.19587   0.00000
 121        5PX         0.00000  -0.01610  -0.18270   0.00000   0.02243
 122        5PY         0.03378   0.00000   0.00000  -0.00126   0.00000
 123        5PZ        -0.12737   0.00000   0.00000  -0.04785   0.00000
 124        6PX         0.00000  -0.01164  -0.55518   0.00000  -0.04610
 125        6PY         0.24130   0.00000   0.00000   0.23707   0.00000
 126        6PZ         0.35775   0.00000   0.00000  -0.30832   0.00000
 127        7PX         0.00000  -0.46521   1.94597   0.00000  -0.29923
 128        7PY         0.26985   0.00000   0.00000   4.49273   0.00000
 129        7PZ         1.28729   0.00000   0.00000   1.00956   0.00000
 130        8D 0       -0.01864   0.00000   0.00000  -0.01847   0.00000
 131        8D+1        0.00000   0.01217  -0.01168   0.00000   0.00121
 132        8D-1       -0.03233   0.00000   0.00000  -0.01464   0.00000
 133        8D+2       -0.00552   0.00000   0.00000   0.01047   0.00000
 134        8D-2        0.00000  -0.00924  -0.00901   0.00000  -0.00280
 135        9D 0       -0.00554   0.00000   0.00000  -0.07221   0.00000
 136        9D+1        0.00000   0.07524   0.08344   0.00000  -0.19722
 137        9D-1       -0.41061   0.00000   0.00000   0.52543   0.00000
 138        9D+2        0.01269   0.00000   0.00000  -0.01334   0.00000
 139        9D-2        0.00000   0.02550   0.26543   0.00000   0.10473
 140       10F 0        0.02267   0.00000   0.00000  -0.01819   0.00000
 141       10F+1        0.00000   0.00741  -0.00187   0.00000  -0.00110
 142       10F-1        0.02324   0.00000   0.00000  -0.00794   0.00000
 143       10F+2       -0.01859   0.00000   0.00000  -0.01018   0.00000
 144       10F-2        0.00000   0.00597  -0.00685   0.00000   0.00969
 145       10F+3        0.00000   0.00662  -0.03046   0.00000   0.00440
 146       10F-3       -0.00156   0.00000   0.00000  -0.01534   0.00000
 147 8   H  1S         -0.05059   0.00000   0.00000  -0.08056   0.00000
 148        2S          0.87995   0.00000   0.00000  -0.69148   0.00000
 149        3S          1.13571   0.00000   0.00000   1.91674   0.00000
 150        4PX         0.00000   0.00652   0.00458   0.00000  -0.00519
 151        4PY         0.00199   0.00000   0.00000  -0.00761   0.00000
 152        4PZ         0.00706   0.00000   0.00000  -0.01958   0.00000
 153        5PX         0.00000  -0.08488   0.02339   0.00000   0.04923
 154        5PY         0.27406   0.00000   0.00000   0.08774   0.00000
 155        5PZ         0.44559   0.00000   0.00000   0.05722   0.00000
 156        6D 0        0.02609   0.00000   0.00000  -0.00101   0.00000
 157        6D+1        0.00000   0.00179   0.01023   0.00000  -0.00174
 158        6D-1        0.03066   0.00000   0.00000  -0.00104   0.00000
 159        6D+2       -0.01121   0.00000   0.00000  -0.00450   0.00000
 160        6D-2        0.00000  -0.00468   0.00169   0.00000  -0.00235
 161 9   C  1S         -0.00924   0.00000   0.00000   0.08706   0.00000
 162        2S          0.04916   0.00000   0.00000  -0.16810   0.00000
 163        3S          0.00720   0.00000   0.00000  -0.01994   0.00000
 164        4S         -0.69519   0.00000   0.00000  -4.19587   0.00000
 165        5PX         0.00000  -0.01610   0.18270   0.00000   0.02243
 166        5PY        -0.03378   0.00000   0.00000  -0.00126   0.00000
 167        5PZ        -0.12737   0.00000   0.00000   0.04785   0.00000
 168        6PX         0.00000  -0.01164   0.55518   0.00000  -0.04610
 169        6PY        -0.24130   0.00000   0.00000   0.23707   0.00000
 170        6PZ         0.35775   0.00000   0.00000   0.30832   0.00000
 171        7PX         0.00000  -0.46521  -1.94597   0.00000  -0.29923
 172        7PY        -0.26985   0.00000   0.00000   4.49273   0.00000
 173        7PZ         1.28729   0.00000   0.00000  -1.00956   0.00000
 174        8D 0       -0.01864   0.00000   0.00000   0.01847   0.00000
 175        8D+1        0.00000   0.01217   0.01168   0.00000   0.00121
 176        8D-1        0.03233   0.00000   0.00000  -0.01464   0.00000
 177        8D+2       -0.00552   0.00000   0.00000  -0.01047   0.00000
 178        8D-2        0.00000   0.00924  -0.00901   0.00000   0.00280
 179        9D 0       -0.00554   0.00000   0.00000   0.07221   0.00000
 180        9D+1        0.00000   0.07524  -0.08344   0.00000  -0.19722
 181        9D-1        0.41061   0.00000   0.00000   0.52543   0.00000
 182        9D+2        0.01269   0.00000   0.00000   0.01334   0.00000
 183        9D-2        0.00000  -0.02550   0.26543   0.00000  -0.10473
 184       10F 0        0.02267   0.00000   0.00000   0.01819   0.00000
 185       10F+1        0.00000   0.00741   0.00187   0.00000  -0.00110
 186       10F-1       -0.02324   0.00000   0.00000  -0.00794   0.00000
 187       10F+2       -0.01859   0.00000   0.00000   0.01018   0.00000
 188       10F-2        0.00000  -0.00597  -0.00685   0.00000  -0.00969
 189       10F+3        0.00000   0.00662   0.03046   0.00000   0.00440
 190       10F-3        0.00156   0.00000   0.00000  -0.01534   0.00000
 191 10  H  1S         -0.05059   0.00000   0.00000   0.08056   0.00000
 192        2S          0.87995   0.00000   0.00000   0.69148   0.00000
 193        3S          1.13571   0.00000   0.00000  -1.91674   0.00000
 194        4PX         0.00000   0.00652  -0.00458   0.00000  -0.00519
 195        4PY        -0.00199   0.00000   0.00000  -0.00761   0.00000
 196        4PZ         0.00706   0.00000   0.00000   0.01958   0.00000
 197        5PX         0.00000  -0.08488  -0.02339   0.00000   0.04923
 198        5PY        -0.27406   0.00000   0.00000   0.08774   0.00000
 199        5PZ         0.44559   0.00000   0.00000  -0.05722   0.00000
 200        6D 0        0.02609   0.00000   0.00000   0.00101   0.00000
 201        6D+1        0.00000   0.00179  -0.01023   0.00000  -0.00174
 202        6D-1       -0.03066   0.00000   0.00000  -0.00104   0.00000
 203        6D+2       -0.01121   0.00000   0.00000   0.00450   0.00000
 204        6D-2        0.00000   0.00468   0.00169   0.00000   0.00235
 205 11  Si 1S         -0.03203   0.00000   0.00000   0.00000   0.00000
 206        2S          0.09390   0.00000   0.00000   0.00000   0.00000
 207        3S         -0.44641   0.00000   0.00000   0.00000   0.00000
 208        4S         -0.29859   0.00000   0.00000   0.00000   0.00000
 209        5S          4.46434   0.00000   0.00000   0.00000   0.00000
 210        6PX         0.00000   0.11836   0.00000   0.00000  -0.07828
 211        6PY         0.00000   0.00000   0.00000  -0.00582   0.00000
 212        6PZ         0.01395   0.00000   0.00000   0.00000   0.00000
 213        7PX         0.00000  -1.00694   0.00000   0.00000   0.45496
 214        7PY         0.00000   0.00000   0.00000  -0.51366   0.00000
 215        7PZ        -0.43495   0.00000   0.00000   0.00000   0.00000
 216        8PX         0.00000  -0.01898   0.00000   0.00000   0.02019
 217        8PY         0.00000   0.00000   0.00000   0.01266   0.00000
 218        8PZ         0.02008   0.00000   0.00000   0.00000   0.00000
 219        9PX         0.00000  -0.28145   0.00000   0.00000  -0.88398
 220        9PY         0.00000   0.00000   0.00000  -1.52444   0.00000
 221        9PZ        -1.84658   0.00000   0.00000   0.00000   0.00000
 222       10D 0        0.28382   0.00000   0.00000   0.00000   0.00000
 223       10D+1        0.00000   0.25928   0.00000   0.00000   0.77619
 224       10D-1        0.00000   0.00000   0.00000   0.08921   0.00000
 225       10D+2       -0.12493   0.00000   0.00000   0.00000   0.00000
 226       10D-2        0.00000   0.00000  -0.31917   0.00000   0.00000
 227       11D 0       -0.00777   0.00000   0.00000   0.00000   0.00000
 228       11D+1        0.00000   0.08277   0.00000   0.00000  -0.09952
 229       11D-1        0.00000   0.00000   0.00000   0.08530   0.00000
 230       11D+2       -0.00748   0.00000   0.00000   0.00000   0.00000
 231       11D-2        0.00000   0.00000  -0.04385   0.00000   0.00000
 232       12F 0       -0.03746   0.00000   0.00000   0.00000   0.00000
 233       12F+1        0.00000   0.12441   0.00000   0.00000  -0.03799
 234       12F-1        0.00000   0.00000   0.00000   0.01196   0.00000
 235       12F+2        0.16089   0.00000   0.00000   0.00000   0.00000
 236       12F-2        0.00000   0.00000   0.02871   0.00000   0.00000
 237       12F+3        0.00000   0.10563   0.00000   0.00000   0.05661
 238       12F-3        0.00000   0.00000   0.00000  -0.00487   0.00000
 239 12  F  1S         -0.00201  -0.01398   0.00000   0.00000   0.01178
 240        2S          0.04788   0.04962   0.00000   0.00000  -0.04250
 241        3S          0.00973   0.01447   0.00000   0.00000  -0.01063
 242        4S         -0.24974   0.03188   0.00000   0.00000  -0.27037
 243        5PX        -0.06597  -0.03088   0.00000   0.00000   0.03108
 244        5PY         0.00000   0.00000   0.01194   0.00087   0.00000
 245        5PZ        -0.01443  -0.03035   0.00000   0.00000   0.04523
 246        6PX        -0.09243  -0.03389   0.00000   0.00000   0.04973
 247        6PY         0.00000   0.00000   0.00693  -0.00439   0.00000
 248        6PZ        -0.00213  -0.03027   0.00000   0.00000   0.08287
 249        7PX         0.03562  -0.04093   0.00000   0.00000   0.15899
 250        7PY         0.00000   0.00000   0.07055   0.06669   0.00000
 251        7PZ         0.01674  -0.12856   0.00000   0.00000   0.06086
 252        8D 0        0.00001  -0.00265   0.00000   0.00000   0.00067
 253        8D+1       -0.00116  -0.00309   0.00000   0.00000   0.00126
 254        8D-1        0.00000   0.00000   0.00084   0.00027   0.00000
 255        8D+2       -0.00062   0.00007   0.00000   0.00000  -0.00040
 256        8D-2        0.00000   0.00000   0.00044   0.00056   0.00000
 257        9D 0       -0.00248   0.00253   0.00000   0.00000   0.00730
 258        9D+1       -0.01586  -0.00569   0.00000   0.00000   0.00137
 259        9D-1        0.00000   0.00000   0.00341  -0.01308   0.00000
 260        9D+2       -0.00861  -0.00481   0.00000   0.00000  -0.00621
 261        9D-2        0.00000   0.00000   0.00284  -0.00246   0.00000
 262       10F 0        0.00013  -0.00007   0.00000   0.00000   0.00024
 263       10F+1        0.00056  -0.00009   0.00000   0.00000   0.00012
 264       10F-1        0.00000   0.00000  -0.00018   0.00025   0.00000
 265       10F+2       -0.00010   0.00033   0.00000   0.00000   0.00010
 266       10F-2        0.00000   0.00000  -0.00029   0.00037   0.00000
 267       10F+3       -0.00019   0.00049   0.00000   0.00000  -0.00002
 268       10F-3        0.00000   0.00000  -0.00013  -0.00014   0.00000
 269 13  F  1S         -0.00201   0.01398   0.00000   0.00000  -0.01178
 270        2S          0.04788  -0.04962   0.00000   0.00000   0.04250
 271        3S          0.00973  -0.01447   0.00000   0.00000   0.01063
 272        4S         -0.24974  -0.03188   0.00000   0.00000   0.27037
 273        5PX         0.06597  -0.03088   0.00000   0.00000   0.03108
 274        5PY         0.00000   0.00000  -0.01194   0.00087   0.00000
 275        5PZ        -0.01443   0.03035   0.00000   0.00000  -0.04523
 276        6PX         0.09243  -0.03389   0.00000   0.00000   0.04973
 277        6PY         0.00000   0.00000  -0.00693  -0.00439   0.00000
 278        6PZ        -0.00213   0.03027   0.00000   0.00000  -0.08287
 279        7PX        -0.03562  -0.04093   0.00000   0.00000   0.15899
 280        7PY         0.00000   0.00000  -0.07055   0.06669   0.00000
 281        7PZ         0.01674   0.12856   0.00000   0.00000  -0.06086
 282        8D 0        0.00001   0.00265   0.00000   0.00000  -0.00067
 283        8D+1        0.00116  -0.00309   0.00000   0.00000   0.00126
 284        8D-1        0.00000   0.00000  -0.00084   0.00027   0.00000
 285        8D+2       -0.00062  -0.00007   0.00000   0.00000   0.00040
 286        8D-2        0.00000   0.00000   0.00044  -0.00056   0.00000
 287        9D 0       -0.00248  -0.00253   0.00000   0.00000  -0.00730
 288        9D+1        0.01586  -0.00569   0.00000   0.00000   0.00137
 289        9D-1        0.00000   0.00000  -0.00341  -0.01308   0.00000
 290        9D+2       -0.00861   0.00481   0.00000   0.00000   0.00621
 291        9D-2        0.00000   0.00000   0.00284   0.00246   0.00000
 292       10F 0        0.00013   0.00007   0.00000   0.00000  -0.00024
 293       10F+1       -0.00056  -0.00009   0.00000   0.00000   0.00012
 294       10F-1        0.00000   0.00000   0.00018   0.00025   0.00000
 295       10F+2       -0.00010  -0.00033   0.00000   0.00000  -0.00010
 296       10F-2        0.00000   0.00000  -0.00029  -0.00037   0.00000
 297       10F+3        0.00019   0.00049   0.00000   0.00000  -0.00002
 298       10F-3        0.00000   0.00000   0.00013  -0.00014   0.00000
                          61        62        63        64        65
                        (A2)--V   (A1)--V   (B2)--V   (A1)--V   (B2)--V
     Eigenvalues --     0.61750   0.62156   0.62316   0.63563   0.65001
   1 1   C  1S          0.00000   0.01018   0.07023   0.01239   0.04188
   2        2S          0.00000   0.06378  -0.12441  -0.04674  -0.10695
   3        3S          0.00000   0.05770  -0.05388   0.00175  -0.06248
   4        4S          0.00000  -2.08258   3.00017  -0.82563   0.98450
   5        5PX        -0.21055   0.00000   0.00000   0.00000   0.00000
   6        5PY         0.00000  -0.09848  -0.12176  -0.05737  -0.05271
   7        5PZ         0.00000  -0.13693   0.02184   0.00411  -0.01310
   8        6PX         0.55270   0.00000   0.00000   0.00000   0.00000
   9        6PY         0.00000   0.19636   0.32136   0.03938   0.02322
  10        6PZ         0.00000  -0.05170   0.24138   0.21138  -0.08375
  11        7PX         4.58286   0.00000   0.00000   0.00000   0.00000
  12        7PY         0.00000   1.05791   1.40810   1.01431   0.38921
  13        7PZ         0.00000   2.60382   0.19131   0.55767  -0.09138
  14        8D 0        0.00000  -0.00009  -0.02049  -0.02184  -0.01498
  15        8D+1        0.00286   0.00000   0.00000   0.00000   0.00000
  16        8D-1        0.00000  -0.00263  -0.00238   0.00422   0.01320
  17        8D+2        0.00000   0.00683   0.00422  -0.00007   0.01314
  18        8D-2        0.03434   0.00000   0.00000   0.00000   0.00000
  19        9D 0        0.00000  -0.43838  -0.37015  -0.07005  -0.14450
  20        9D+1        0.08243   0.00000   0.00000   0.00000   0.00000
  21        9D-1        0.00000  -0.19158   0.07961  -0.11055   0.01801
  22        9D+2        0.00000   0.13026   0.27370   0.10095  -0.07954
  23        9D-2        0.88017   0.00000   0.00000   0.00000   0.00000
  24       10F 0        0.00000   0.00717  -0.01412  -0.00098   0.00318
  25       10F+1       -0.05147   0.00000   0.00000   0.00000   0.00000
  26       10F-1        0.00000   0.02335  -0.02279   0.00510  -0.01395
  27       10F+2        0.00000  -0.01666  -0.00418  -0.00630   0.00932
  28       10F-2        0.02024   0.00000   0.00000   0.00000   0.00000
  29       10F+3       -0.02786   0.00000   0.00000   0.00000   0.00000
  30       10F-3        0.00000   0.00897   0.04190   0.00319   0.02406
  31 2   H  1S          0.05523   0.01342   0.05321   0.02889   0.04489
  32        2S         -1.66168  -0.13708  -0.64066   0.08371  -0.17335
  33        3S         -2.28575  -0.72288  -1.37637  -0.43401  -0.62988
  34        4PX         0.01595  -0.00588  -0.00175  -0.00538  -0.00588
  35        4PY        -0.00126   0.00161   0.00682   0.00204  -0.00019
  36        4PZ        -0.00089   0.01059   0.00088   0.00205  -0.00529
  37        5PX         0.55169   0.21986   0.45502   0.11456   0.29318
  38        5PY         0.49934   0.05911   0.27006   0.02343   0.08152
  39        5PZ         0.08112  -0.08795   0.03308  -0.00000   0.07958
  40        6D 0        0.01659   0.01083   0.01850   0.00053   0.00833
  41        6D+1       -0.00699  -0.00255  -0.00217  -0.00181  -0.00529
  42        6D-1       -0.00394  -0.00018  -0.00219   0.00351  -0.00409
  43        6D+2       -0.01132  -0.00374  -0.00791  -0.00185  -0.01117
  44        6D-2       -0.04208  -0.00556  -0.02577  -0.00582  -0.00965
  45 3   H  1S         -0.05523   0.01342   0.05321   0.02889   0.04489
  46        2S          1.66168  -0.13708  -0.64066   0.08371  -0.17335
  47        3S          2.28575  -0.72288  -1.37637  -0.43401  -0.62988
  48        4PX         0.01595   0.00588   0.00175   0.00538   0.00588
  49        4PY         0.00126   0.00161   0.00682   0.00204  -0.00019
  50        4PZ         0.00089   0.01059   0.00088   0.00205  -0.00529
  51        5PX         0.55169  -0.21986  -0.45502  -0.11456  -0.29318
  52        5PY        -0.49934   0.05911   0.27006   0.02343   0.08152
  53        5PZ        -0.08112  -0.08795   0.03308  -0.00000   0.07958
  54        6D 0       -0.01659   0.01083   0.01850   0.00053   0.00833
  55        6D+1       -0.00699   0.00255   0.00217   0.00181   0.00529
  56        6D-1        0.00394  -0.00018  -0.00219   0.00351  -0.00409
  57        6D+2        0.01132  -0.00374  -0.00791  -0.00185  -0.01117
  58        6D-2       -0.04208   0.00556   0.02577   0.00582   0.00965
  59 4   H  1S          0.05523   0.01342  -0.05321   0.02889  -0.04489
  60        2S         -1.66168  -0.13708   0.64066   0.08371   0.17335
  61        3S         -2.28575  -0.72288   1.37637  -0.43401   0.62988
  62        4PX        -0.01595   0.00588  -0.00175   0.00538  -0.00588
  63        4PY         0.00126  -0.00161   0.00682  -0.00204  -0.00019
  64        4PZ        -0.00089   0.01059  -0.00088   0.00205   0.00529
  65        5PX        -0.55169  -0.21986   0.45502  -0.11456   0.29318
  66        5PY        -0.49934  -0.05911   0.27006  -0.02343   0.08152
  67        5PZ         0.08112  -0.08795  -0.03308  -0.00000  -0.07958
  68        6D 0        0.01659   0.01083  -0.01850   0.00053  -0.00833
  69        6D+1        0.00699   0.00255  -0.00217   0.00181  -0.00529
  70        6D-1        0.00394   0.00018  -0.00219  -0.00351  -0.00409
  71        6D+2       -0.01132  -0.00374   0.00791  -0.00185   0.01117
  72        6D-2       -0.04208  -0.00556   0.02577  -0.00582   0.00965
  73 5   H  1S         -0.05523   0.01342  -0.05321   0.02889  -0.04489
  74        2S          1.66168  -0.13708   0.64066   0.08371   0.17335
  75        3S          2.28575  -0.72288   1.37637  -0.43401   0.62988
  76        4PX        -0.01595  -0.00588   0.00175  -0.00538   0.00588
  77        4PY        -0.00126  -0.00161   0.00682  -0.00204  -0.00019
  78        4PZ         0.00089   0.01059  -0.00088   0.00205   0.00529
  79        5PX        -0.55169   0.21986  -0.45502   0.11456  -0.29318
  80        5PY         0.49934  -0.05911   0.27006  -0.02343   0.08152
  81        5PZ        -0.08112  -0.08795  -0.03308  -0.00000  -0.07958
  82        6D 0       -0.01659   0.01083  -0.01850   0.00053  -0.00833
  83        6D+1        0.00699  -0.00255   0.00217  -0.00181   0.00529
  84        6D-1       -0.00394   0.00018  -0.00219  -0.00351  -0.00409
  85        6D+2        0.01132  -0.00374   0.00791  -0.00185   0.01117
  86        6D-2       -0.04208   0.00556  -0.02577   0.00582  -0.00965
  87 6   C  1S          0.00000   0.01018  -0.07023   0.01239  -0.04188
  88        2S          0.00000   0.06378   0.12441  -0.04674   0.10695
  89        3S          0.00000   0.05770   0.05388   0.00175   0.06248
  90        4S          0.00000  -2.08258  -3.00017  -0.82563  -0.98450
  91        5PX         0.21055   0.00000   0.00000   0.00000   0.00000
  92        5PY         0.00000   0.09848  -0.12176   0.05737  -0.05271
  93        5PZ         0.00000  -0.13693  -0.02184   0.00411   0.01310
  94        6PX        -0.55270   0.00000   0.00000   0.00000   0.00000
  95        6PY         0.00000  -0.19636   0.32136  -0.03938   0.02322
  96        6PZ         0.00000  -0.05170  -0.24138   0.21138   0.08375
  97        7PX        -4.58286   0.00000   0.00000   0.00000   0.00000
  98        7PY         0.00000  -1.05791   1.40810  -1.01431   0.38921
  99        7PZ         0.00000   2.60382  -0.19131   0.55767   0.09138
 100        8D 0        0.00000  -0.00009   0.02049  -0.02184   0.01498
 101        8D+1       -0.00286   0.00000   0.00000   0.00000   0.00000
 102        8D-1        0.00000   0.00263  -0.00238  -0.00422   0.01320
 103        8D+2        0.00000   0.00683  -0.00422  -0.00007  -0.01314
 104        8D-2        0.03434   0.00000   0.00000   0.00000   0.00000
 105        9D 0        0.00000  -0.43838   0.37015  -0.07005   0.14450
 106        9D+1       -0.08243   0.00000   0.00000   0.00000   0.00000
 107        9D-1        0.00000   0.19158   0.07961   0.11055   0.01801
 108        9D+2        0.00000   0.13026  -0.27370   0.10095   0.07954
 109        9D-2        0.88017   0.00000   0.00000   0.00000   0.00000
 110       10F 0        0.00000   0.00717   0.01412  -0.00098  -0.00318
 111       10F+1        0.05147   0.00000   0.00000   0.00000   0.00000
 112       10F-1        0.00000  -0.02335  -0.02279  -0.00510  -0.01395
 113       10F+2        0.00000  -0.01666   0.00418  -0.00630  -0.00932
 114       10F-2        0.02024   0.00000   0.00000   0.00000   0.00000
 115       10F+3        0.02786   0.00000   0.00000   0.00000   0.00000
 116       10F-3        0.00000  -0.00897   0.04190  -0.00319   0.02406
 117 7   C  1S          0.00000   0.05453   0.01443  -0.03049   0.03826
 118        2S          0.00000  -0.20247  -0.00403  -0.03064  -0.10864
 119        3S          0.00000  -0.11454   0.04161  -0.00641  -0.14653
 120        4S          0.00000   5.44566  -2.55077  -0.88892   8.37786
 121        5PX        -0.03049   0.00000   0.00000   0.00000   0.00000
 122        5PY         0.00000   0.10024  -0.10001  -0.06869   0.07700
 123        5PZ         0.00000  -0.06982  -0.05175  -0.12195   0.08461
 124        6PX        -0.12566   0.00000   0.00000   0.00000   0.00000
 125        6PY         0.00000  -0.20643   0.35360  -0.05454  -0.27050
 126        6PZ         0.00000  -0.26467   0.33379   0.11971  -0.46935
 127        7PX         1.31520   0.00000   0.00000   0.00000   0.00000
 128        7PY         0.00000  -2.24545   0.47116   0.87280   1.02431
 129        7PZ         0.00000   0.75359   1.06022   2.13271  -3.63227
 130        8D 0        0.00000   0.01634  -0.00399  -0.00544  -0.00313
 131        8D+1       -0.01329   0.00000   0.00000   0.00000   0.00000
 132        8D-1        0.00000   0.00196  -0.01402   0.00254   0.01476
 133        8D+2        0.00000  -0.00352  -0.01150   0.00790   0.00347
 134        8D-2        0.00933   0.00000   0.00000   0.00000   0.00000
 135        9D 0        0.00000   0.36546  -0.52467  -0.12609   0.66984
 136        9D+1        0.12423   0.00000   0.00000   0.00000   0.00000
 137        9D-1        0.00000   0.00437  -0.42482  -0.39972   0.72438
 138        9D+2        0.00000  -0.12682  -0.07687   0.11528  -0.30945
 139        9D-2       -0.13129   0.00000   0.00000   0.00000   0.00000
 140       10F 0        0.00000  -0.00066   0.01231   0.01902  -0.03753
 141       10F+1       -0.00402   0.00000   0.00000   0.00000   0.00000
 142       10F-1        0.00000  -0.06876   0.03534   0.01267  -0.07597
 143       10F+2        0.00000   0.00703  -0.01311  -0.01838   0.02911
 144       10F-2       -0.01096   0.00000   0.00000   0.00000   0.00000
 145       10F+3        0.00066   0.00000   0.00000   0.00000   0.00000
 146       10F-3        0.00000   0.01116  -0.01226  -0.00841  -0.00645
 147 8   H  1S          0.00000   0.01772  -0.01153  -0.03143   0.04271
 148        2S          0.00000  -1.31757   1.63416   0.90878  -2.94699
 149        3S          0.00000  -0.63948   0.98563   1.92924  -2.41102
 150        4PX         0.00530   0.00000   0.00000   0.00000   0.00000
 151        4PY         0.00000  -0.01710   0.01207  -0.00047  -0.01398
 152        4PZ         0.00000  -0.00930   0.01377   0.00279  -0.02781
 153        5PX        -0.01755   0.00000   0.00000   0.00000   0.00000
 154        5PY         0.00000  -0.16226   0.32349   0.23691  -0.57923
 155        5PZ         0.00000  -0.48475   0.52268   0.43199  -0.89568
 156        6D 0        0.00000  -0.02869   0.02477   0.01577  -0.03511
 157        6D+1        0.00106   0.00000   0.00000   0.00000   0.00000
 158        6D-1        0.00000  -0.02741   0.03409   0.01708  -0.05120
 159        6D+2        0.00000   0.00907  -0.01085  -0.00477   0.01904
 160        6D-2        0.00723   0.00000   0.00000   0.00000   0.00000
 161 9   C  1S          0.00000   0.05453  -0.01443  -0.03049  -0.03826
 162        2S          0.00000  -0.20247   0.00403  -0.03064   0.10864
 163        3S          0.00000  -0.11454  -0.04161  -0.00641   0.14653
 164        4S          0.00000   5.44566   2.55077  -0.88892  -8.37786
 165        5PX         0.03049   0.00000   0.00000   0.00000   0.00000
 166        5PY         0.00000  -0.10024  -0.10001   0.06869   0.07700
 167        5PZ         0.00000  -0.06982   0.05175  -0.12195  -0.08461
 168        6PX         0.12566   0.00000   0.00000   0.00000   0.00000
 169        6PY         0.00000   0.20643   0.35360   0.05454  -0.27050
 170        6PZ         0.00000  -0.26467  -0.33379   0.11971   0.46935
 171        7PX        -1.31520   0.00000   0.00000   0.00000   0.00000
 172        7PY         0.00000   2.24545   0.47116  -0.87280   1.02431
 173        7PZ         0.00000   0.75359  -1.06022   2.13271   3.63227
 174        8D 0        0.00000   0.01634   0.00399  -0.00544   0.00313
 175        8D+1        0.01329   0.00000   0.00000   0.00000   0.00000
 176        8D-1        0.00000  -0.00196  -0.01402  -0.00254   0.01476
 177        8D+2        0.00000  -0.00352   0.01150   0.00790  -0.00347
 178        8D-2        0.00933   0.00000   0.00000   0.00000   0.00000
 179        9D 0        0.00000   0.36546   0.52467  -0.12609  -0.66984
 180        9D+1       -0.12423   0.00000   0.00000   0.00000   0.00000
 181        9D-1        0.00000  -0.00437  -0.42482   0.39972   0.72438
 182        9D+2        0.00000  -0.12682   0.07687   0.11528   0.30945
 183        9D-2       -0.13129   0.00000   0.00000   0.00000   0.00000
 184       10F 0        0.00000  -0.00066  -0.01231   0.01902   0.03753
 185       10F+1        0.00402   0.00000   0.00000   0.00000   0.00000
 186       10F-1        0.00000   0.06876   0.03534  -0.01267  -0.07597
 187       10F+2        0.00000   0.00703   0.01311  -0.01838  -0.02911
 188       10F-2       -0.01096   0.00000   0.00000   0.00000   0.00000
 189       10F+3       -0.00066   0.00000   0.00000   0.00000   0.00000
 190       10F-3        0.00000  -0.01116  -0.01226   0.00841  -0.00645
 191 10  H  1S          0.00000   0.01772   0.01153  -0.03143  -0.04271
 192        2S          0.00000  -1.31757  -1.63416   0.90878   2.94699
 193        3S          0.00000  -0.63948  -0.98563   1.92924   2.41102
 194        4PX        -0.00530   0.00000   0.00000   0.00000   0.00000
 195        4PY         0.00000   0.01710   0.01207   0.00047  -0.01398
 196        4PZ         0.00000  -0.00930  -0.01377   0.00279   0.02781
 197        5PX         0.01755   0.00000   0.00000   0.00000   0.00000
 198        5PY         0.00000   0.16226   0.32349  -0.23691  -0.57923
 199        5PZ         0.00000  -0.48475  -0.52268   0.43199   0.89568
 200        6D 0        0.00000  -0.02869  -0.02477   0.01577   0.03511
 201        6D+1       -0.00106   0.00000   0.00000   0.00000   0.00000
 202        6D-1        0.00000   0.02741   0.03409  -0.01708  -0.05120
 203        6D+2        0.00000   0.00907   0.01085  -0.00477  -0.01904
 204        6D-2        0.00723   0.00000   0.00000   0.00000   0.00000
 205 11  Si 1S          0.00000  -0.01292   0.00000   0.01026   0.00000
 206        2S          0.00000  -0.05367   0.00000  -0.00621   0.00000
 207        3S          0.00000  -0.38299   0.00000   0.19465   0.00000
 208        4S          0.00000  -0.01697   0.00000   0.10038   0.00000
 209        5S          0.00000  -0.26117   0.00000  -0.20237   0.00000
 210        6PX         0.00000   0.00000   0.00000   0.00000   0.00000
 211        6PY         0.00000   0.00000   0.03154   0.00000  -0.01862
 212        6PZ         0.00000   0.01547   0.00000  -0.07066   0.00000
 213        7PX         0.00000   0.00000   0.00000   0.00000   0.00000
 214        7PY         0.00000   0.00000  -0.11316   0.00000  -0.06173
 215        7PZ         0.00000  -0.20890   0.00000   0.44832   0.00000
 216        8PX         0.00000   0.00000   0.00000   0.00000   0.00000
 217        8PY         0.00000   0.00000   0.00124   0.00000   0.00566
 218        8PZ         0.00000  -0.00900   0.00000   0.02268   0.00000
 219        9PX         0.00000   0.00000   0.00000   0.00000   0.00000
 220        9PY         0.00000   0.00000   0.02743   0.00000   0.20243
 221        9PZ         0.00000  -0.41977   0.00000  -0.21582   0.00000
 222       10D 0        0.00000   0.18810   0.00000   0.57719   0.00000
 223       10D+1        0.00000   0.00000   0.00000   0.00000   0.00000
 224       10D-1        0.00000   0.00000   0.28919   0.00000  -0.15267
 225       10D+2        0.00000  -0.11778   0.00000   0.02241   0.00000
 226       10D-2       -0.92754   0.00000   0.00000   0.00000   0.00000
 227       11D 0        0.00000   0.06405   0.00000   0.09240   0.00000
 228       11D+1        0.00000   0.00000   0.00000   0.00000   0.00000
 229       11D-1        0.00000   0.00000  -0.05432   0.00000   0.06063
 230       11D+2        0.00000   0.01566   0.00000  -0.05759   0.00000
 231       11D-2        0.01802   0.00000   0.00000   0.00000   0.00000
 232       12F 0        0.00000   0.03909   0.00000   0.03214   0.00000
 233       12F+1        0.00000   0.00000   0.00000   0.00000   0.00000
 234       12F-1        0.00000   0.00000   0.03156   0.00000  -0.01666
 235       12F+2        0.00000  -0.02897   0.00000  -0.07197   0.00000
 236       12F-2        0.03261   0.00000   0.00000   0.00000   0.00000
 237       12F+3        0.00000   0.00000   0.00000   0.00000   0.00000
 238       12F-3        0.00000   0.00000   0.00434   0.00000   0.03089
 239 12  F  1S          0.00000  -0.00958   0.00000   0.00456   0.00000
 240        2S          0.00000   0.01586   0.00000  -0.03079   0.00000
 241        3S          0.00000   0.00576   0.00000  -0.00730   0.00000
 242        4S          0.00000   0.20158   0.00000   0.03942   0.00000
 243        5PX         0.00000   0.00914   0.00000   0.08081   0.00000
 244        5PY        -0.00802   0.00000   0.00212   0.00000  -0.00589
 245        5PZ         0.00000  -0.00293   0.00000  -0.03292   0.00000
 246        6PX         0.00000   0.02206   0.00000   0.12088   0.00000
 247        6PY        -0.03417   0.00000   0.01020   0.00000  -0.01690
 248        6PZ         0.00000  -0.00316   0.00000  -0.04641   0.00000
 249        7PX         0.00000  -0.08690   0.00000   0.08483   0.00000
 250        7PY         0.18305   0.00000  -0.04879   0.00000   0.03235
 251        7PZ         0.00000  -0.08381   0.00000  -0.10129   0.00000
 252        8D 0        0.00000  -0.00081   0.00000  -0.00302   0.00000
 253        8D+1        0.00000  -0.00208   0.00000  -0.00088   0.00000
 254        8D-1        0.00190   0.00000   0.00012   0.00000  -0.00012
 255        8D+2        0.00000  -0.00057   0.00000   0.00265   0.00000
 256        8D-2        0.00139   0.00000  -0.00087   0.00000   0.00028
 257        9D 0        0.00000  -0.00513   0.00000  -0.00686   0.00000
 258        9D+1        0.00000   0.00907   0.00000   0.00189   0.00000
 259        9D-1       -0.01457   0.00000   0.00695   0.00000  -0.00463
 260        9D+2        0.00000  -0.00608   0.00000   0.01716   0.00000
 261        9D-2       -0.00229   0.00000  -0.00280   0.00000  -0.00082
 262       10F 0        0.00000   0.00028   0.00000  -0.00019   0.00000
 263       10F+1        0.00000  -0.00038   0.00000   0.00005   0.00000
 264       10F-1        0.00043   0.00000  -0.00016   0.00000   0.00013
 265       10F+2        0.00000  -0.00006   0.00000  -0.00022   0.00000
 266       10F-2       -0.00025   0.00000  -0.00010   0.00000  -0.00008
 267       10F+3        0.00000   0.00043   0.00000  -0.00034   0.00000
 268       10F-3       -0.00036   0.00000  -0.00004   0.00000  -0.00007
 269 13  F  1S          0.00000  -0.00958   0.00000   0.00456   0.00000
 270        2S          0.00000   0.01586   0.00000  -0.03079   0.00000
 271        3S          0.00000   0.00576   0.00000  -0.00730   0.00000
 272        4S          0.00000   0.20158   0.00000   0.03942   0.00000
 273        5PX         0.00000  -0.00914   0.00000  -0.08081   0.00000
 274        5PY         0.00802   0.00000   0.00212   0.00000  -0.00589
 275        5PZ         0.00000  -0.00293   0.00000  -0.03292   0.00000
 276        6PX         0.00000  -0.02206   0.00000  -0.12088   0.00000
 277        6PY         0.03417   0.00000   0.01020   0.00000  -0.01690
 278        6PZ         0.00000  -0.00316   0.00000  -0.04641   0.00000
 279        7PX         0.00000   0.08690   0.00000  -0.08483   0.00000
 280        7PY        -0.18305   0.00000  -0.04879   0.00000   0.03235
 281        7PZ         0.00000  -0.08381   0.00000  -0.10129   0.00000
 282        8D 0        0.00000  -0.00081   0.00000  -0.00302   0.00000
 283        8D+1        0.00000   0.00208   0.00000   0.00088   0.00000
 284        8D-1       -0.00190   0.00000   0.00012   0.00000  -0.00012
 285        8D+2        0.00000  -0.00057   0.00000   0.00265   0.00000
 286        8D-2        0.00139   0.00000   0.00087   0.00000  -0.00028
 287        9D 0        0.00000  -0.00513   0.00000  -0.00686   0.00000
 288        9D+1        0.00000  -0.00907   0.00000  -0.00189   0.00000
 289        9D-1        0.01457   0.00000   0.00695   0.00000  -0.00463
 290        9D+2        0.00000  -0.00608   0.00000   0.01716   0.00000
 291        9D-2       -0.00229   0.00000   0.00280   0.00000   0.00082
 292       10F 0        0.00000   0.00028   0.00000  -0.00019   0.00000
 293       10F+1        0.00000   0.00038   0.00000  -0.00005   0.00000
 294       10F-1       -0.00043   0.00000  -0.00016   0.00000   0.00013
 295       10F+2        0.00000  -0.00006   0.00000  -0.00022   0.00000
 296       10F-2       -0.00025   0.00000   0.00010   0.00000   0.00008
 297       10F+3        0.00000  -0.00043   0.00000   0.00034   0.00000
 298       10F-3        0.00036   0.00000  -0.00004   0.00000  -0.00007
                          66        67        68        69        70
                        (A1)--V   (A2)--V   (B1)--V   (B2)--V   (A1)--V
     Eigenvalues --     0.65231   0.65729   0.71484   0.72985   0.75872
   1 1   C  1S          0.06246   0.00000   0.00000  -0.00126  -0.00071
   2        2S         -0.11229   0.00000   0.00000   0.01703  -0.02128
   3        3S         -0.10029   0.00000   0.00000  -0.03937  -0.00685
   4        4S          5.62871   0.00000   0.00000   4.87409  -0.06422
   5        5PX         0.00000   0.07023   0.00204   0.00000   0.00000
   6        5PY        -0.14880   0.00000   0.00000   0.03988   0.04765
   7        5PZ         0.04535   0.00000   0.00000   0.12989  -0.05502
   8        6PX         0.00000   0.15110  -0.00442   0.00000   0.00000
   9        6PY         0.16491   0.00000   0.00000  -0.33823   0.35733
  10        6PZ         0.04614   0.00000   0.00000   0.00807   0.02894
  11        7PX         0.00000   1.84843   2.18759   0.00000   0.00000
  12        7PY         1.24376   0.00000   0.00000  -2.62813  -0.00428
  13        7PZ        -2.10735   0.00000   0.00000  -2.45486  -1.84066
  14        8D 0       -0.01131   0.00000   0.00000   0.00264   0.00126
  15        8D+1        0.00000  -0.02285  -0.01887   0.00000   0.00000
  16        8D-1       -0.00211   0.00000   0.00000   0.01504  -0.01379
  17        8D+2        0.01643   0.00000   0.00000  -0.00716   0.00705
  18        8D-2        0.00000  -0.00902  -0.00416   0.00000   0.00000
  19        9D 0       -0.25537   0.00000   0.00000   0.24154  -0.31053
  20        9D+1        0.00000   0.10450   0.14478   0.00000   0.00000
  21        9D-1        0.26494   0.00000   0.00000   0.31086   0.03939
  22        9D+2        0.13488   0.00000   0.00000  -0.15195  -0.03014
  23        9D-2        0.00000  -0.02112  -0.02614   0.00000   0.00000
  24       10F 0       -0.01643   0.00000   0.00000  -0.00026   0.00885
  25       10F+1        0.00000  -0.01196  -0.00041   0.00000   0.00000
  26       10F-1       -0.04168   0.00000   0.00000  -0.00495   0.00856
  27       10F+2        0.01528   0.00000   0.00000   0.01612   0.00056
  28       10F-2        0.00000   0.01624   0.00460   0.00000   0.00000
  29       10F+3        0.00000  -0.01015  -0.00385   0.00000   0.00000
  30       10F-3        0.05377   0.00000   0.00000  -0.00231   0.02365
  31 2   H  1S          0.04908  -0.02991  -0.02519   0.01485  -0.00500
  32        2S         -0.96452  -0.76950  -0.59003   0.16021  -0.32749
  33        3S         -1.31503  -0.12723  -0.53947   0.64789   0.23405
  34        4PX        -0.00149   0.01128   0.01085   0.00120   0.00737
  35        4PY         0.00949   0.00807   0.00060  -0.00919   0.00556
  36        4PZ        -0.00799   0.01088   0.01088  -0.00985  -0.00435
  37        5PX         0.55791  -0.00079  -0.03586  -0.12798   0.06503
  38        5PY         0.24157  -0.05032   0.01348   0.02451   0.04067
  39        5PZ         0.10776  -0.19727  -0.18708   0.12042   0.01747
  40        6D 0        0.02321  -0.00040   0.00434  -0.00791   0.00900
  41        6D+1       -0.00165   0.00553   0.00594   0.00127  -0.00137
  42        6D-1       -0.00670   0.01035   0.00867   0.00128  -0.00224
  43        6D+2       -0.01593  -0.00218   0.00242   0.00520  -0.00416
  44        6D-2       -0.02555  -0.00309   0.00102   0.00749  -0.00553
  45 3   H  1S          0.04908   0.02991   0.02519   0.01485  -0.00500
  46        2S         -0.96452   0.76950   0.59003   0.16021  -0.32749
  47        3S         -1.31503   0.12723   0.53947   0.64789   0.23405
  48        4PX         0.00149   0.01128   0.01085  -0.00120  -0.00737
  49        4PY         0.00949  -0.00807  -0.00060  -0.00919   0.00556
  50        4PZ        -0.00799  -0.01088  -0.01088  -0.00985  -0.00435
  51        5PX        -0.55791  -0.00079  -0.03586   0.12798  -0.06503
  52        5PY         0.24157   0.05032  -0.01348   0.02451   0.04067
  53        5PZ         0.10776   0.19727   0.18708   0.12042   0.01747
  54        6D 0        0.02321   0.00040  -0.00434  -0.00791   0.00900
  55        6D+1        0.00165   0.00553   0.00594  -0.00127   0.00137
  56        6D-1       -0.00670  -0.01035  -0.00867   0.00128  -0.00224
  57        6D+2       -0.01593   0.00218  -0.00242   0.00520  -0.00416
  58        6D-2        0.02555  -0.00309   0.00102  -0.00749   0.00553
  59 4   H  1S          0.04908  -0.02991   0.02519  -0.01485  -0.00500
  60        2S         -0.96452  -0.76950   0.59003  -0.16021  -0.32749
  61        3S         -1.31503  -0.12723   0.53947  -0.64789   0.23405
  62        4PX         0.00149  -0.01128   0.01085   0.00120  -0.00737
  63        4PY        -0.00949  -0.00807   0.00060  -0.00919  -0.00556
  64        4PZ        -0.00799   0.01088  -0.01088   0.00985  -0.00435
  65        5PX        -0.55791   0.00079  -0.03586  -0.12798  -0.06503
  66        5PY        -0.24157   0.05032   0.01348   0.02451  -0.04067
  67        5PZ         0.10776  -0.19727   0.18708  -0.12042   0.01747
  68        6D 0        0.02321  -0.00040  -0.00434   0.00791   0.00900
  69        6D+1        0.00165  -0.00553   0.00594   0.00127   0.00137
  70        6D-1        0.00670  -0.01035   0.00867   0.00128   0.00224
  71        6D+2       -0.01593  -0.00218  -0.00242  -0.00520  -0.00416
  72        6D-2       -0.02555  -0.00309  -0.00102  -0.00749  -0.00553
  73 5   H  1S          0.04908   0.02991  -0.02519  -0.01485  -0.00500
  74        2S         -0.96452   0.76950  -0.59003  -0.16021  -0.32749
  75        3S         -1.31503   0.12723  -0.53947  -0.64789   0.23405
  76        4PX        -0.00149  -0.01128   0.01085  -0.00120   0.00737
  77        4PY        -0.00949   0.00807  -0.00060  -0.00919  -0.00556
  78        4PZ        -0.00799  -0.01088   0.01088   0.00985  -0.00435
  79        5PX         0.55791   0.00079  -0.03586   0.12798   0.06503
  80        5PY        -0.24157  -0.05032  -0.01348   0.02451  -0.04067
  81        5PZ         0.10776   0.19727  -0.18708  -0.12042   0.01747
  82        6D 0        0.02321   0.00040   0.00434   0.00791   0.00900
  83        6D+1       -0.00165  -0.00553   0.00594  -0.00127  -0.00137
  84        6D-1        0.00670   0.01035  -0.00867   0.00128   0.00224
  85        6D+2       -0.01593   0.00218   0.00242  -0.00520  -0.00416
  86        6D-2        0.02555  -0.00309  -0.00102   0.00749   0.00553
  87 6   C  1S          0.06246   0.00000   0.00000   0.00126  -0.00071
  88        2S         -0.11229   0.00000   0.00000  -0.01703  -0.02128
  89        3S         -0.10029   0.00000   0.00000   0.03937  -0.00685
  90        4S          5.62871   0.00000   0.00000  -4.87409  -0.06422
  91        5PX         0.00000  -0.07023   0.00204   0.00000   0.00000
  92        5PY         0.14880   0.00000   0.00000   0.03988  -0.04765
  93        5PZ         0.04535   0.00000   0.00000  -0.12989  -0.05502
  94        6PX         0.00000  -0.15110  -0.00442   0.00000   0.00000
  95        6PY        -0.16491   0.00000   0.00000  -0.33823  -0.35733
  96        6PZ         0.04614   0.00000   0.00000  -0.00807   0.02894
  97        7PX         0.00000  -1.84843   2.18759   0.00000   0.00000
  98        7PY        -1.24376   0.00000   0.00000  -2.62813   0.00428
  99        7PZ        -2.10735   0.00000   0.00000   2.45486  -1.84066
 100        8D 0       -0.01131   0.00000   0.00000  -0.00264   0.00126
 101        8D+1        0.00000   0.02285  -0.01887   0.00000   0.00000
 102        8D-1        0.00211   0.00000   0.00000   0.01504   0.01379
 103        8D+2        0.01643   0.00000   0.00000   0.00716   0.00705
 104        8D-2        0.00000  -0.00902   0.00416   0.00000   0.00000
 105        9D 0       -0.25537   0.00000   0.00000  -0.24154  -0.31053
 106        9D+1        0.00000  -0.10450   0.14478   0.00000   0.00000
 107        9D-1       -0.26494   0.00000   0.00000   0.31086  -0.03939
 108        9D+2        0.13488   0.00000   0.00000   0.15195  -0.03014
 109        9D-2        0.00000  -0.02112   0.02614   0.00000   0.00000
 110       10F 0       -0.01643   0.00000   0.00000   0.00026   0.00885
 111       10F+1        0.00000   0.01196  -0.00041   0.00000   0.00000
 112       10F-1        0.04168   0.00000   0.00000  -0.00495  -0.00856
 113       10F+2        0.01528   0.00000   0.00000  -0.01612   0.00056
 114       10F-2        0.00000   0.01624  -0.00460   0.00000   0.00000
 115       10F+3        0.00000   0.01015  -0.00385   0.00000   0.00000
 116       10F-3       -0.05377   0.00000   0.00000  -0.00231  -0.02365
 117 7   C  1S         -0.01499   0.00000   0.00000   0.04608   0.00909
 118        2S          0.12473   0.00000   0.00000  -0.20344  -0.17578
 119        3S          0.07675   0.00000   0.00000  -0.18869  -0.07488
 120        4S         -3.47047   0.00000   0.00000  12.77463  -1.97675
 121        5PX         0.00000   0.08117   0.00783   0.00000   0.00000
 122        5PY        -0.03517   0.00000   0.00000  -0.02330   0.01226
 123        5PZ         0.03156   0.00000   0.00000  -0.15808  -0.02564
 124        6PX         0.00000   0.06990   0.09333   0.00000   0.00000
 125        6PY         0.18269   0.00000   0.00000   0.31674  -0.28241
 126        6PZ         0.12021   0.00000   0.00000  -0.46679  -0.19301
 127        7PX         0.00000   0.80517  -0.38673   0.00000   0.00000
 128        7PY         1.46324   0.00000   0.00000   2.52454   2.01002
 129        7PZ        -0.89550   0.00000   0.00000   4.64858   1.30704
 130        8D 0       -0.01339   0.00000   0.00000  -0.02088   0.01808
 131        8D+1        0.00000  -0.01465   0.00281   0.00000   0.00000
 132        8D-1       -0.01449   0.00000   0.00000   0.00057   0.02124
 133        8D+2       -0.00375   0.00000   0.00000  -0.01687   0.01718
 134        8D-2        0.00000  -0.00019  -0.01153   0.00000   0.00000
 135        9D 0       -0.12668   0.00000   0.00000   0.15043  -0.01521
 136        9D+1        0.00000  -0.07454   0.03258   0.00000   0.00000
 137        9D-1        0.03981   0.00000   0.00000   0.14644  -0.08947
 138        9D+2        0.07293   0.00000   0.00000  -0.60867  -0.15292
 139        9D-2        0.00000   0.01159  -0.16448   0.00000   0.00000
 140       10F 0        0.00123   0.00000   0.00000  -0.00546  -0.00156
 141       10F+1        0.00000  -0.00666  -0.00027   0.00000   0.00000
 142       10F-1        0.03917   0.00000   0.00000  -0.08153  -0.01961
 143       10F+2       -0.00517   0.00000   0.00000  -0.00290  -0.01391
 144       10F-2        0.00000   0.00296  -0.00774   0.00000   0.00000
 145       10F+3        0.00000   0.00957  -0.00774   0.00000   0.00000
 146       10F-3        0.00184   0.00000   0.00000  -0.03600  -0.00962
 147 8   H  1S         -0.02511   0.00000   0.00000  -0.01379   0.04385
 148        2S          0.51676   0.00000   0.00000  -1.14588   0.75963
 149        3S          0.10557   0.00000   0.00000   1.55409   0.91259
 150        4PX         0.00000  -0.00705  -0.01019   0.00000   0.00000
 151        4PY         0.00761   0.00000   0.00000  -0.01560   0.00162
 152        4PZ         0.00650   0.00000   0.00000  -0.01402   0.00529
 153        5PX         0.00000   0.15971   0.10055   0.00000   0.00000
 154        5PY         0.08135   0.00000   0.00000  -0.08879  -0.02099
 155        5PZ         0.21981   0.00000   0.00000  -0.31475  -0.15416
 156        6D 0        0.01496   0.00000   0.00000  -0.01736  -0.01346
 157        6D+1        0.00000   0.00402   0.00216   0.00000   0.00000
 158        6D-1        0.01451   0.00000   0.00000  -0.01562  -0.00932
 159        6D+2       -0.00561   0.00000   0.00000   0.00967   0.00483
 160        6D-2        0.00000   0.00324  -0.00432   0.00000   0.00000
 161 9   C  1S         -0.01499   0.00000   0.00000  -0.04608   0.00909
 162        2S          0.12473   0.00000   0.00000   0.20344  -0.17578
 163        3S          0.07675   0.00000   0.00000   0.18869  -0.07488
 164        4S         -3.47047   0.00000   0.00000 -12.77463  -1.97675
 165        5PX         0.00000  -0.08117   0.00783   0.00000   0.00000
 166        5PY         0.03517   0.00000   0.00000  -0.02330  -0.01226
 167        5PZ         0.03156   0.00000   0.00000   0.15808  -0.02564
 168        6PX         0.00000  -0.06990   0.09333   0.00000   0.00000
 169        6PY        -0.18269   0.00000   0.00000   0.31674   0.28241
 170        6PZ         0.12021   0.00000   0.00000   0.46679  -0.19301
 171        7PX         0.00000  -0.80517  -0.38673   0.00000   0.00000
 172        7PY        -1.46324   0.00000   0.00000   2.52454  -2.01002
 173        7PZ        -0.89550   0.00000   0.00000  -4.64858   1.30704
 174        8D 0       -0.01339   0.00000   0.00000   0.02088   0.01808
 175        8D+1        0.00000   0.01465   0.00281   0.00000   0.00000
 176        8D-1        0.01449   0.00000   0.00000   0.00057  -0.02124
 177        8D+2       -0.00375   0.00000   0.00000   0.01687   0.01718
 178        8D-2        0.00000  -0.00019   0.01153   0.00000   0.00000
 179        9D 0       -0.12668   0.00000   0.00000  -0.15043  -0.01521
 180        9D+1        0.00000   0.07454   0.03258   0.00000   0.00000
 181        9D-1       -0.03981   0.00000   0.00000   0.14644   0.08947
 182        9D+2        0.07293   0.00000   0.00000   0.60867  -0.15292
 183        9D-2        0.00000   0.01159   0.16448   0.00000   0.00000
 184       10F 0        0.00123   0.00000   0.00000   0.00546  -0.00156
 185       10F+1        0.00000   0.00666  -0.00027   0.00000   0.00000
 186       10F-1       -0.03917   0.00000   0.00000  -0.08153   0.01961
 187       10F+2       -0.00517   0.00000   0.00000   0.00290  -0.01391
 188       10F-2        0.00000   0.00296   0.00774   0.00000   0.00000
 189       10F+3        0.00000  -0.00957  -0.00774   0.00000   0.00000
 190       10F-3       -0.00184   0.00000   0.00000  -0.03600   0.00962
 191 10  H  1S         -0.02511   0.00000   0.00000   0.01379   0.04385
 192        2S          0.51676   0.00000   0.00000   1.14588   0.75963
 193        3S          0.10557   0.00000   0.00000  -1.55409   0.91259
 194        4PX         0.00000   0.00705  -0.01019   0.00000   0.00000
 195        4PY        -0.00761   0.00000   0.00000  -0.01560  -0.00162
 196        4PZ         0.00650   0.00000   0.00000   0.01402   0.00529
 197        5PX         0.00000  -0.15971   0.10055   0.00000   0.00000
 198        5PY        -0.08135   0.00000   0.00000  -0.08879   0.02099
 199        5PZ         0.21981   0.00000   0.00000   0.31475  -0.15416
 200        6D 0        0.01496   0.00000   0.00000   0.01736  -0.01346
 201        6D+1        0.00000  -0.00402   0.00216   0.00000   0.00000
 202        6D-1       -0.01451   0.00000   0.00000  -0.01562   0.00932
 203        6D+2       -0.00561   0.00000   0.00000  -0.00967   0.00483
 204        6D-2        0.00000   0.00324   0.00432   0.00000   0.00000
 205 11  Si 1S         -0.01973   0.00000   0.00000   0.00000  -0.02033
 206        2S          0.06736   0.00000   0.00000   0.00000  -0.04035
 207        3S         -0.24681   0.00000   0.00000   0.00000  -0.50418
 208        4S         -0.12336   0.00000   0.00000   0.00000   0.05645
 209        5S          1.98829   0.00000   0.00000   0.00000   0.33769
 210        6PX         0.00000   0.00000  -0.05774   0.00000   0.00000
 211        6PY         0.00000   0.00000   0.00000   0.06133   0.00000
 212        6PZ        -0.01520   0.00000   0.00000   0.00000   0.03069
 213        7PX         0.00000   0.00000   1.26416   0.00000   0.00000
 214        7PY         0.00000   0.00000   0.00000  -0.44050   0.00000
 215        7PZ        -0.20632   0.00000   0.00000   0.00000  -0.79079
 216        8PX         0.00000   0.00000  -0.02342   0.00000   0.00000
 217        8PY         0.00000   0.00000   0.00000  -0.02585   0.00000
 218        8PZ         0.00937   0.00000   0.00000   0.00000   0.00321
 219        9PX         0.00000   0.00000  -1.01386   0.00000   0.00000
 220        9PY         0.00000   0.00000   0.00000  -0.01133   0.00000
 221        9PZ        -0.25731   0.00000   0.00000   0.00000   0.60421
 222       10D 0       -0.62615   0.00000   0.00000   0.00000  -1.46050
 223       10D+1        0.00000   0.00000   2.18605   0.00000   0.00000
 224       10D-1        0.00000   0.00000   0.00000   0.98224   0.00000
 225       10D+2       -0.20409   0.00000   0.00000   0.00000  -1.60784
 226       10D-2        0.00000  -1.29368   0.00000   0.00000   0.00000
 227       11D 0       -0.05158   0.00000   0.00000   0.00000  -0.00930
 228       11D+1        0.00000   0.00000  -0.01104   0.00000   0.00000
 229       11D-1        0.00000   0.00000   0.00000  -0.00495   0.00000
 230       11D+2       -0.05697   0.00000   0.00000   0.00000  -0.00016
 231       11D-2        0.00000   0.03332   0.00000   0.00000   0.00000
 232       12F 0       -0.02552   0.00000   0.00000   0.00000   0.09345
 233       12F+1        0.00000   0.00000   0.08344   0.00000   0.00000
 234       12F-1        0.00000   0.00000   0.00000   0.02608   0.00000
 235       12F+2        0.07535   0.00000   0.00000   0.00000  -0.13569
 236       12F-2        0.00000  -0.00903   0.00000   0.00000   0.00000
 237       12F+3        0.00000   0.00000   0.16484   0.00000   0.00000
 238       12F-3        0.00000   0.00000   0.00000  -0.07457   0.00000
 239 12  F  1S         -0.00510   0.00000   0.04173   0.00000  -0.02960
 240        2S          0.01919   0.00000  -0.05818   0.00000   0.04998
 241        3S          0.00592   0.00000  -0.02105   0.00000   0.01669
 242        4S         -0.03570   0.00000  -1.21736   0.00000   0.77726
 243        5PX        -0.03567   0.00000   0.02546   0.00000  -0.01042
 244        5PY         0.00000   0.03443   0.00000  -0.01559   0.00000
 245        5PZ         0.00490   0.00000  -0.00098   0.00000  -0.00210
 246        6PX        -0.03118   0.00000   0.03043   0.00000   0.01990
 247        6PY         0.00000   0.02630   0.00000  -0.01655   0.00000
 248        6PZ         0.01270   0.00000  -0.01399   0.00000  -0.01440
 249        7PX        -0.14206   0.00000   0.65916   0.00000  -0.55470
 250        7PY         0.00000   0.28552   0.00000  -0.10841   0.00000
 251        7PZ         0.04555   0.00000   0.38211   0.00000  -0.23176
 252        8D 0        0.00163   0.00000  -0.00073   0.00000   0.00013
 253        8D+1       -0.00026   0.00000   0.00741   0.00000  -0.00407
 254        8D-1        0.00000   0.00416   0.00000   0.00056   0.00000
 255        8D+2       -0.00278   0.00000   0.00424   0.00000  -0.00679
 256        8D-2        0.00000   0.00297   0.00000  -0.00169   0.00000
 257        9D 0       -0.00201   0.00000   0.00226   0.00000  -0.00281
 258        9D+1       -0.00093   0.00000  -0.02013   0.00000   0.03580
 259        9D-1        0.00000  -0.00738   0.00000   0.01552   0.00000
 260        9D+2       -0.00524   0.00000  -0.03987   0.00000  -0.00872
 261        9D-2        0.00000  -0.00522   0.00000  -0.00324   0.00000
 262       10F 0        0.00037   0.00000  -0.00017   0.00000   0.00092
 263       10F+1        0.00009   0.00000   0.00016   0.00000  -0.00135
 264       10F-1        0.00000   0.00021   0.00000  -0.00034   0.00000
 265       10F+2       -0.00011   0.00000   0.00200   0.00000  -0.00117
 266       10F-2        0.00000  -0.00003   0.00000  -0.00046   0.00000
 267       10F+3        0.00008   0.00000   0.00155   0.00000   0.00077
 268       10F-3        0.00000   0.00014   0.00000   0.00040   0.00000
 269 13  F  1S         -0.00510   0.00000  -0.04173   0.00000  -0.02960
 270        2S          0.01919   0.00000   0.05818   0.00000   0.04998
 271        3S          0.00592   0.00000   0.02105   0.00000   0.01669
 272        4S         -0.03570   0.00000   1.21736   0.00000   0.77726
 273        5PX         0.03567   0.00000   0.02546   0.00000   0.01042
 274        5PY         0.00000  -0.03443   0.00000  -0.01559   0.00000
 275        5PZ         0.00490   0.00000   0.00098   0.00000  -0.00210
 276        6PX         0.03118   0.00000   0.03043   0.00000  -0.01990
 277        6PY         0.00000  -0.02630   0.00000  -0.01655   0.00000
 278        6PZ         0.01270   0.00000   0.01399   0.00000  -0.01440
 279        7PX         0.14206   0.00000   0.65916   0.00000   0.55470
 280        7PY         0.00000  -0.28552   0.00000  -0.10841   0.00000
 281        7PZ         0.04555   0.00000  -0.38211   0.00000  -0.23176
 282        8D 0        0.00163   0.00000   0.00073   0.00000   0.00013
 283        8D+1        0.00026   0.00000   0.00741   0.00000   0.00407
 284        8D-1        0.00000  -0.00416   0.00000   0.00056   0.00000
 285        8D+2       -0.00278   0.00000  -0.00424   0.00000  -0.00679
 286        8D-2        0.00000   0.00297   0.00000   0.00169   0.00000
 287        9D 0       -0.00201   0.00000  -0.00226   0.00000  -0.00281
 288        9D+1        0.00093   0.00000  -0.02013   0.00000  -0.03580
 289        9D-1        0.00000   0.00738   0.00000   0.01552   0.00000
 290        9D+2       -0.00524   0.00000   0.03987   0.00000  -0.00872
 291        9D-2        0.00000  -0.00522   0.00000   0.00324   0.00000
 292       10F 0        0.00037   0.00000   0.00017   0.00000   0.00092
 293       10F+1       -0.00009   0.00000   0.00016   0.00000   0.00135
 294       10F-1        0.00000  -0.00021   0.00000  -0.00034   0.00000
 295       10F+2       -0.00011   0.00000  -0.00200   0.00000  -0.00117
 296       10F-2        0.00000  -0.00003   0.00000   0.00046   0.00000
 297       10F+3       -0.00008   0.00000   0.00155   0.00000  -0.00077
 298       10F-3        0.00000  -0.00014   0.00000   0.00040   0.00000
                          71        72        73        74        75
                        (B2)--V   (B1)--V   (A1)--V   (B2)--V   (B1)--V
     Eigenvalues --     0.77029   0.79842   0.81314   0.83175   0.84768
   1 1   C  1S          0.05860   0.00000   0.03726  -0.00475   0.00000
   2        2S         -0.26737   0.00000  -0.12965  -0.02699   0.00000
   3        3S         -0.14344   0.00000  -0.00829  -0.02758   0.00000
   4        4S          6.59304   0.00000  -2.06494   0.35627   0.00000
   5        5PX         0.00000   0.05849   0.00000   0.00000   0.00093
   6        5PY         0.05120   0.00000   0.06706   0.06899   0.00000
   7        5PZ         0.05155   0.00000   0.03957  -0.08192   0.00000
   8        6PX         0.00000   0.13749   0.00000   0.00000  -0.08505
   9        6PY         0.38001   0.00000   0.08735   0.30273   0.00000
  10        6PZ        -0.37677   0.00000  -0.33792  -0.41548   0.00000
  11        7PX         0.00000   1.23123   0.00000   0.00000   0.63103
  12        7PY        -0.39366   0.00000  -0.48605  -0.81153   0.00000
  13        7PZ        -3.13692   0.00000  -0.74264   0.86166   0.00000
  14        8D 0       -0.00058   0.00000   0.00713   0.00011   0.00000
  15        8D+1        0.00000   0.00617   0.00000   0.00000  -0.00292
  16        8D-1        0.00667   0.00000  -0.00325   0.00996   0.00000
  17        8D+2        0.00228   0.00000  -0.00004   0.00000   0.00000
  18        8D-2        0.00000  -0.01363   0.00000   0.00000   0.00788
  19        9D 0        0.03205   0.00000   0.08449  -0.21537   0.00000
  20        9D+1        0.00000   0.05704   0.00000   0.00000   0.14359
  21        9D-1        0.28912   0.00000   0.22171   0.04893   0.00000
  22        9D+2        0.02147   0.00000  -0.30547  -0.03952   0.00000
  23        9D-2        0.00000   0.11859   0.00000   0.00000  -0.25152
  24       10F 0       -0.00952   0.00000  -0.00231   0.00741   0.00000
  25       10F+1        0.00000  -0.00676   0.00000   0.00000   0.00058
  26       10F-1       -0.04836   0.00000   0.01029  -0.00213   0.00000
  27       10F+2        0.01512   0.00000   0.00968   0.00365   0.00000
  28       10F-2        0.00000  -0.00683   0.00000   0.00000  -0.00987
  29       10F+3        0.00000  -0.01774   0.00000   0.00000   0.00822
  30       10F-3        0.04494   0.00000  -0.02136   0.02409   0.00000
  31 2   H  1S          0.00959  -0.03181   0.01488  -0.00963   0.00171
  32        2S         -0.65355  -0.62419   0.67602  -0.36702   0.03981
  33        3S         -0.48217  -0.09337   0.02374   0.03256  -0.16003
  34        4PX         0.00649   0.00850  -0.01082   0.00938  -0.00126
  35        4PY         0.00803   0.01270  -0.00705   0.00401  -0.00594
  36        4PZ        -0.00185  -0.01896  -0.00049   0.00192  -0.01375
  37        5PX         0.26512   0.02090  -0.00397  -0.01576  -0.06377
  38        5PY         0.18865  -0.15329  -0.06390   0.05358   0.02145
  39        5PZ         0.07851   0.26447  -0.00919   0.00144   0.13669
  40        6D 0        0.01471  -0.00243   0.00076   0.00253   0.00142
  41        6D+1       -0.00312  -0.00342   0.00156  -0.00345  -0.00020
  42        6D-1       -0.00661  -0.00654  -0.00036  -0.00369  -0.00079
  43        6D+2       -0.00924  -0.00648  -0.00773  -0.00151   0.00631
  44        6D-2       -0.02007   0.00127   0.01177  -0.00637   0.00049
  45 3   H  1S          0.00959   0.03181   0.01488  -0.00963  -0.00171
  46        2S         -0.65355   0.62419   0.67602  -0.36702  -0.03981
  47        3S         -0.48217   0.09337   0.02374   0.03256   0.16003
  48        4PX        -0.00649   0.00850   0.01082  -0.00938  -0.00126
  49        4PY         0.00803  -0.01270  -0.00705   0.00401   0.00594
  50        4PZ        -0.00185   0.01896  -0.00049   0.00192   0.01375
  51        5PX        -0.26512   0.02090   0.00397   0.01576  -0.06377
  52        5PY         0.18865   0.15329  -0.06390   0.05358  -0.02145
  53        5PZ         0.07851  -0.26447  -0.00919   0.00144  -0.13669
  54        6D 0        0.01471   0.00243   0.00076   0.00253  -0.00142
  55        6D+1        0.00312  -0.00342  -0.00156   0.00345  -0.00020
  56        6D-1       -0.00661   0.00654  -0.00036  -0.00369   0.00079
  57        6D+2       -0.00924   0.00648  -0.00773  -0.00151  -0.00631
  58        6D-2        0.02007   0.00127  -0.01177   0.00637   0.00049
  59 4   H  1S         -0.00959   0.03181   0.01488   0.00963  -0.00171
  60        2S          0.65355   0.62419   0.67602   0.36702  -0.03981
  61        3S          0.48217   0.09337   0.02374  -0.03256   0.16003
  62        4PX         0.00649   0.00850   0.01082   0.00938  -0.00126
  63        4PY         0.00803   0.01270   0.00705   0.00401  -0.00594
  64        4PZ         0.00185   0.01896  -0.00049  -0.00192   0.01375
  65        5PX         0.26512   0.02090   0.00397  -0.01576  -0.06377
  66        5PY         0.18865  -0.15329   0.06390   0.05358   0.02145
  67        5PZ        -0.07851  -0.26447  -0.00919  -0.00144  -0.13669
  68        6D 0       -0.01471   0.00243   0.00076  -0.00253  -0.00142
  69        6D+1       -0.00312  -0.00342  -0.00156  -0.00345  -0.00020
  70        6D-1       -0.00661  -0.00654   0.00036  -0.00369  -0.00079
  71        6D+2        0.00924   0.00648  -0.00773   0.00151  -0.00631
  72        6D-2        0.02007  -0.00127   0.01177   0.00637  -0.00049
  73 5   H  1S         -0.00959  -0.03181   0.01488   0.00963   0.00171
  74        2S          0.65355  -0.62419   0.67602   0.36702   0.03981
  75        3S          0.48217  -0.09337   0.02374  -0.03256  -0.16003
  76        4PX        -0.00649   0.00850  -0.01082  -0.00938  -0.00126
  77        4PY         0.00803  -0.01270   0.00705   0.00401   0.00594
  78        4PZ         0.00185  -0.01896  -0.00049  -0.00192  -0.01375
  79        5PX        -0.26512   0.02090  -0.00397   0.01576  -0.06377
  80        5PY         0.18865   0.15329   0.06390   0.05358  -0.02145
  81        5PZ        -0.07851   0.26447  -0.00919  -0.00144   0.13669
  82        6D 0       -0.01471  -0.00243   0.00076  -0.00253   0.00142
  83        6D+1        0.00312  -0.00342   0.00156   0.00345  -0.00020
  84        6D-1       -0.00661   0.00654   0.00036  -0.00369   0.00079
  85        6D+2        0.00924  -0.00648  -0.00773   0.00151   0.00631
  86        6D-2       -0.02007  -0.00127  -0.01177  -0.00637  -0.00049
  87 6   C  1S         -0.05860   0.00000   0.03726   0.00475   0.00000
  88        2S          0.26737   0.00000  -0.12965   0.02699   0.00000
  89        3S          0.14344   0.00000  -0.00829   0.02758   0.00000
  90        4S         -6.59304   0.00000  -2.06494  -0.35627   0.00000
  91        5PX         0.00000   0.05849   0.00000   0.00000   0.00093
  92        5PY         0.05120   0.00000  -0.06706   0.06899   0.00000
  93        5PZ        -0.05155   0.00000   0.03957   0.08192   0.00000
  94        6PX         0.00000   0.13749   0.00000   0.00000  -0.08505
  95        6PY         0.38001   0.00000  -0.08735   0.30273   0.00000
  96        6PZ         0.37677   0.00000  -0.33792   0.41548   0.00000
  97        7PX         0.00000   1.23123   0.00000   0.00000   0.63103
  98        7PY        -0.39366   0.00000   0.48605  -0.81153   0.00000
  99        7PZ         3.13692   0.00000  -0.74264  -0.86166   0.00000
 100        8D 0        0.00058   0.00000   0.00713  -0.00011   0.00000
 101        8D+1        0.00000   0.00617   0.00000   0.00000  -0.00292
 102        8D-1        0.00667   0.00000   0.00325   0.00996   0.00000
 103        8D+2       -0.00228   0.00000  -0.00004  -0.00000   0.00000
 104        8D-2        0.00000   0.01363   0.00000   0.00000  -0.00788
 105        9D 0       -0.03205   0.00000   0.08449   0.21537   0.00000
 106        9D+1        0.00000   0.05704   0.00000   0.00000   0.14359
 107        9D-1        0.28912   0.00000  -0.22171   0.04893   0.00000
 108        9D+2       -0.02147   0.00000  -0.30547   0.03952   0.00000
 109        9D-2        0.00000  -0.11859   0.00000   0.00000   0.25152
 110       10F 0        0.00952   0.00000  -0.00231  -0.00741   0.00000
 111       10F+1        0.00000  -0.00676   0.00000   0.00000   0.00058
 112       10F-1       -0.04836   0.00000  -0.01029  -0.00213   0.00000
 113       10F+2       -0.01512   0.00000   0.00968  -0.00365   0.00000
 114       10F-2        0.00000   0.00683   0.00000   0.00000   0.00987
 115       10F+3        0.00000  -0.01774   0.00000   0.00000   0.00822
 116       10F-3        0.04494   0.00000   0.02136   0.02409   0.00000
 117 7   C  1S          0.00670   0.00000  -0.03457   0.05865   0.00000
 118        2S         -0.13921   0.00000   0.17189  -0.18709   0.00000
 119        3S         -0.10655   0.00000   0.05381  -0.15205   0.00000
 120        4S          1.52970   0.00000  -1.28753  11.20808   0.00000
 121        5PX         0.00000   0.00633   0.00000   0.00000  -0.03068
 122        5PY         0.09015   0.00000  -0.07930  -0.23414   0.00000
 123        5PZ        -0.14316   0.00000  -0.02180   0.03396   0.00000
 124        6PX         0.00000  -0.02921   0.00000   0.00000  -0.19282
 125        6PY        -0.10640   0.00000   0.13756   0.22991   0.00000
 126        6PZ        -0.23870   0.00000   0.19873  -0.21279   0.00000
 127        7PX         0.00000  -0.26801   0.00000   0.00000   0.33105
 128        7PY        -3.39553   0.00000  -0.51486   6.08599   0.00000
 129        7PZ         6.13662   0.00000  -0.96181   0.70644   0.00000
 130        8D 0       -0.00008   0.00000  -0.01019  -0.03745   0.00000
 131        8D+1        0.00000   0.00491   0.00000   0.00000  -0.00077
 132        8D-1        0.00568   0.00000  -0.00792   0.00511   0.00000
 133        8D+2       -0.00014   0.00000   0.00374  -0.03440   0.00000
 134        8D-2        0.00000  -0.00995   0.00000   0.00000   0.00355
 135        9D 0        0.47336   0.00000  -0.22448  -0.07460   0.00000
 136        9D+1        0.00000  -0.15213   0.00000   0.00000   0.21113
 137        9D-1       -0.16703   0.00000   0.00201   0.30042   0.00000
 138        9D+2        0.04022   0.00000  -0.04976  -0.73997   0.00000
 139        9D-2        0.00000   0.04151   0.00000   0.00000   0.22094
 140       10F 0        0.01313   0.00000   0.00104  -0.01413   0.00000
 141       10F+1        0.00000  -0.00020   0.00000   0.00000   0.00622
 142       10F-1       -0.03466   0.00000   0.04285  -0.05521   0.00000
 143       10F+2       -0.01414   0.00000   0.00105  -0.00056   0.00000
 144       10F-2        0.00000  -0.00226   0.00000   0.00000   0.00863
 145       10F+3        0.00000   0.00555   0.00000   0.00000   0.00474
 146       10F-3        0.00514   0.00000  -0.00084  -0.05334   0.00000
 147 8   H  1S          0.01259   0.00000  -0.02966   0.00621   0.00000
 148        2S          0.17360   0.00000  -0.02809  -0.78530   0.00000
 149        3S          1.14866   0.00000  -0.02671   0.95956   0.00000
 150        4PX         0.00000  -0.00867   0.00000   0.00000   0.02840
 151        4PY        -0.01255   0.00000  -0.00662   0.00288   0.00000
 152        4PZ         0.00275   0.00000  -0.00011  -0.01117   0.00000
 153        5PX         0.00000   0.11201   0.00000   0.00000  -0.34595
 154        5PY         0.01621   0.00000   0.29083  -0.35711   0.00000
 155        5PZ        -0.11445   0.00000   0.36799  -0.17254   0.00000
 156        6D 0       -0.00264   0.00000   0.01501  -0.00224   0.00000
 157        6D+1        0.00000   0.00106   0.00000   0.00000   0.00318
 158        6D-1       -0.00862   0.00000   0.02854  -0.01695   0.00000
 159        6D+2        0.00775   0.00000  -0.00970   0.00929   0.00000
 160        6D-2        0.00000  -0.00150   0.00000   0.00000   0.00344
 161 9   C  1S         -0.00670   0.00000  -0.03457  -0.05865   0.00000
 162        2S          0.13921   0.00000   0.17189   0.18709   0.00000
 163        3S          0.10655   0.00000   0.05381   0.15205   0.00000
 164        4S         -1.52970   0.00000  -1.28753 -11.20808   0.00000
 165        5PX         0.00000   0.00633   0.00000   0.00000  -0.03068
 166        5PY         0.09015   0.00000   0.07930  -0.23414   0.00000
 167        5PZ         0.14316   0.00000  -0.02180  -0.03396   0.00000
 168        6PX         0.00000  -0.02921   0.00000   0.00000  -0.19282
 169        6PY        -0.10640   0.00000  -0.13756   0.22991   0.00000
 170        6PZ         0.23870   0.00000   0.19873   0.21279   0.00000
 171        7PX         0.00000  -0.26801   0.00000   0.00000   0.33105
 172        7PY        -3.39553   0.00000   0.51486   6.08599   0.00000
 173        7PZ        -6.13662   0.00000  -0.96181  -0.70644   0.00000
 174        8D 0        0.00008   0.00000  -0.01019   0.03745   0.00000
 175        8D+1        0.00000   0.00491   0.00000   0.00000  -0.00077
 176        8D-1        0.00568   0.00000   0.00792   0.00511   0.00000
 177        8D+2        0.00014   0.00000   0.00374   0.03440   0.00000
 178        8D-2        0.00000   0.00995   0.00000   0.00000  -0.00355
 179        9D 0       -0.47336   0.00000  -0.22448   0.07460   0.00000
 180        9D+1        0.00000  -0.15213   0.00000   0.00000   0.21113
 181        9D-1       -0.16703   0.00000  -0.00201   0.30042   0.00000
 182        9D+2       -0.04022   0.00000  -0.04976   0.73997   0.00000
 183        9D-2        0.00000  -0.04151   0.00000   0.00000  -0.22094
 184       10F 0       -0.01313   0.00000   0.00104   0.01413   0.00000
 185       10F+1        0.00000  -0.00020   0.00000   0.00000   0.00622
 186       10F-1       -0.03466   0.00000  -0.04285  -0.05521   0.00000
 187       10F+2        0.01414   0.00000   0.00105   0.00056   0.00000
 188       10F-2        0.00000   0.00226   0.00000   0.00000  -0.00863
 189       10F+3        0.00000   0.00555   0.00000   0.00000   0.00474
 190       10F-3        0.00514   0.00000   0.00084  -0.05334   0.00000
 191 10  H  1S         -0.01259   0.00000  -0.02966  -0.00621   0.00000
 192        2S         -0.17360   0.00000  -0.02809   0.78530   0.00000
 193        3S         -1.14866   0.00000  -0.02671  -0.95956   0.00000
 194        4PX         0.00000  -0.00867   0.00000   0.00000   0.02840
 195        4PY        -0.01255   0.00000   0.00662   0.00288   0.00000
 196        4PZ        -0.00275   0.00000  -0.00011   0.01117   0.00000
 197        5PX         0.00000   0.11201   0.00000   0.00000  -0.34595
 198        5PY         0.01621   0.00000  -0.29083  -0.35711   0.00000
 199        5PZ         0.11445   0.00000   0.36799   0.17254   0.00000
 200        6D 0        0.00264   0.00000   0.01501   0.00224   0.00000
 201        6D+1        0.00000   0.00106   0.00000   0.00000   0.00318
 202        6D-1       -0.00862   0.00000  -0.02854  -0.01695   0.00000
 203        6D+2       -0.00775   0.00000  -0.00970  -0.00929   0.00000
 204        6D-2        0.00000   0.00150   0.00000   0.00000  -0.00344
 205 11  Si 1S          0.00000   0.00000  -0.02241   0.00000   0.00000
 206        2S          0.00000   0.00000  -0.16385   0.00000   0.00000
 207        3S          0.00000   0.00000  -0.88922   0.00000   0.00000
 208        4S          0.00000   0.00000  -0.36736   0.00000   0.00000
 209        5S          0.00000   0.00000   3.96836   0.00000   0.00000
 210        6PX         0.00000   0.06186   0.00000   0.00000   0.00609
 211        6PY        -0.06874   0.00000   0.00000  -0.04106   0.00000
 212        6PZ         0.00000   0.00000   0.12919   0.00000   0.00000
 213        7PX         0.00000  -0.82574   0.00000   0.00000   0.75176
 214        7PY         0.36079   0.00000   0.00000  -0.00974   0.00000
 215        7PZ         0.00000   0.00000  -1.02569   0.00000   0.00000
 216        8PX         0.00000  -0.03531   0.00000   0.00000  -0.03410
 217        8PY         0.02424   0.00000   0.00000   0.00279   0.00000
 218        8PZ         0.00000   0.00000  -0.03629   0.00000   0.00000
 219        9PX         0.00000  -0.67075   0.00000   0.00000  -0.64897
 220        9PY         1.81131   0.00000   0.00000  -0.07813   0.00000
 221        9PZ         0.00000   0.00000  -1.79583   0.00000   0.00000
 222       10D 0        0.00000   0.00000   0.62534   0.00000   0.00000
 223       10D+1        0.00000   0.38416   0.00000   0.00000   1.42835
 224       10D-1       -1.46216   0.00000   0.00000  -0.83058   0.00000
 225       10D+2        0.00000   0.00000  -1.42430   0.00000   0.00000
[truncated: 4,996,558 more chars]
