# Supplementary material for: The molecular structure and curious motions in 1,1-difluorosilacyclopent-3-ene and silacyclopent-3-ene as determined by microwave spectroscopy and quantum chemical calculations
Source: Royal Society of Chemistry journal article supplement (doi:10.1039/d1cp04286f), 2022-01-01
Supplement: d1cp04286f2.log [file d1cp04286f2.log]

 Entering Gaussian System, Link 0=g16
 Initial command:
 /share/apps/Gaussian/g16_b01/g16/l1.exe "/work/180515.vici.chem.tamu.edu/Gau-11300.inp" -scrdir="/work/180515.vici.chem.tamu.edu/"
 Default is to use a total of  16 processors:
                               16 via shared-memory
                                1 via Linda
 Entering Link 1 = /share/apps/Gaussian/g16_b01/g16/l1.exe PID=     11301.
  
 Copyright (c) 1988-2017, Gaussian, Inc.  All Rights Reserved.
  
 This is part of the Gaussian(R) 16 program.  It is based on
 the Gaussian(R) 09 system (copyright 2009, Gaussian, Inc.),
 the Gaussian(R) 03 system (copyright 2003, Gaussian, Inc.),
 the Gaussian(R) 98 system (copyright 1998, Gaussian, Inc.),
 the Gaussian(R) 94 system (copyright 1995, Gaussian, Inc.),
 the Gaussian 92(TM) system (copyright 1992, Gaussian, Inc.),
 the Gaussian 90(TM) system (copyright 1990, Gaussian, Inc.),
 the Gaussian 88(TM) system (copyright 1988, Gaussian, Inc.),
 the Gaussian 86(TM) system (copyright 1986, Carnegie Mellon
 University), and the Gaussian 82(TM) system (copyright 1983,
 Carnegie Mellon University). Gaussian is a federally registered
 trademark of Gaussian, Inc.
  
 This software contains proprietary and confidential information,
 including trade secrets, belonging to Gaussian, Inc.
  
 This software is provided under written license and may be
 used, copied, transmitted, or stored only in accord with that
 written license.
  
 The following legend is applicable only to US Government
 contracts under FAR:
  
                    RESTRICTED RIGHTS LEGEND
  
 Use, reproduction and disclosure by the US Government is
 subject to restrictions as set forth in subparagraphs (a)
 and (c) of the Commercial Computer Software - Restricted
 Rights clause in FAR 52.227-19.
  
 Gaussian, Inc.
 340 Quinnipiac St., Bldg. 40, Wallingford CT 06492
  
  
 ---------------------------------------------------------------
 Warning -- This program may not be used in any manner that
 competes with the business of Gaussian, Inc. or will provide
 assistance to any competitor of Gaussian, Inc.  The licensee
 of this program is prohibited from giving any competitor of
 Gaussian, Inc. access to this program.  By using this program,
 the user acknowledges that Gaussian, Inc. is engaged in the
 business of creating and licensing software in the field of
 computational chemistry and represents and warrants to the
 licensee that it is not a competitor of Gaussian, Inc. and that
 it will not use this program in any manner prohibited above.
 ---------------------------------------------------------------
  

 Cite this work as:
 Gaussian 16, Revision B.01,
 M. J. Frisch, G. W. Trucks, H. B. Schlegel, G. E. Scuseria, 
 M. A. Robb, J. R. Cheeseman, G. Scalmani, V. Barone, 
 G. A. Petersson, H. Nakatsuji, X. Li, M. Caricato, A. V. Marenich, 
 J. Bloino, B. G. Janesko, R. Gomperts, B. Mennucci, H. P. Hratchian, 
 J. V. Ortiz, A. F. Izmaylov, J. L. Sonnenberg, D. Williams-Young, 
 F. Ding, F. Lipparini, F. Egidi, J. Goings, B. Peng, A. Petrone, 
 T. Henderson, D. Ranasinghe, V. G. Zakrzewski, J. Gao, N. Rega, 
 G. Zheng, W. Liang, M. Hada, M. Ehara, K. Toyota, R. Fukuda, 
 J. Hasegawa, M. Ishida, T. Nakajima, Y. Honda, O. Kitao, H. Nakai, 
 T. Vreven, K. Throssell, J. A. Montgomery, Jr., J. E. Peralta, 
 F. Ogliaro, M. J. Bearpark, J. J. Heyd, E. N. Brothers, K. N. Kudin, 
 V. N. Staroverov, T. A. Keith, R. Kobayashi, J. Normand, 
 K. Raghavachari, A. P. Rendell, J. C. Burant, S. S. Iyengar, 
 J. Tomasi, M. Cossi, J. M. Millam, M. Klene, C. Adamo, R. Cammi, 
 J. W. Ochterski, R. L. Martin, K. Morokuma, O. Farkas, 
 J. B. Foresman, and D. J. Fox, Gaussian, Inc., Wallingford CT, 2016.
 
 ******************************************
 Gaussian 16:  EM64L-G16RevB.01 20-Dec-2017
                20-Nov-2020 
 ******************************************
 %chk=SiH-3-ene_ccsdtzVici.chk
 ------------------------------------------------------
 #p opt ccsd/cc-pvtz pop=full geom=connectivity gfprint
 ------------------------------------------------------
 1/18=20,19=15,38=1,57=2/1,3;
 2/9=110,12=2,17=6,18=5,40=1/2;
 3/5=16,6=1,11=9,24=100,25=1,30=1,71=1/1,2,3;
 4//1;
 5/5=2,38=5/2;
 8/6=4,9=120000,10=1/1,4;
 9/5=7,15=1/13;
 11/28=-8,29=200,42=3/11;
 10/5=6/2;
 6/7=3/1;
 7/12=7/1,2,3,16;
 1/18=20,19=15/3(2);
 2/9=110/2;
 99//99;
 2/9=110/2;
 3/5=16,6=1,11=9,25=1,30=1,71=1/1,2,3;
 4/5=5,16=3,69=1/1;
 5/5=2,38=5/2;
 8/6=4,9=120000,10=1/1,4;
 9/5=7,15=1/13;
 11/28=-8,29=200,42=3/11;
 10/5=6/2;
 7/12=7/1,2,3,16;
 1/18=20,19=15/3(-9);
 2/9=110/2;
 6/7=3/1;
 99/9=10/99;
 Leave Link    1 at Fri Nov 20 17:35:41 2020, MaxMem=           0 cpu:               3.2 elap:               0.2
 (Enter /share/apps/Gaussian/g16_b01/g16/l101.exe)
 -----
 Si4H8
 -----
 Symbolic Z-matrix:
 Charge =  0 Multiplicity = 1
 C
 C                    1    B1
 C                    2    B2       1    A1
 C                    1    B3       2    A2       3    D1       0
 Si                   3    B4       2    A3       1    D2       0
 H                    4    B5       1    A4       2    D3       0
 H                    4    B6       1    A5       2    D4       0
 H                    3    B7       2    A6       1    D5       0
 H                    3    B8       2    A7       1    D6       0
 H                    2    B9       1    A8       4    D7       0
 H                    1    B10      2    A9       3    D8       0
 H                    5    B11      3    A10      2    D9       0
 H                    5    B12      3    A11      2    D10      0
       Variables:
  B1                    1.34233                  
  B2                    1.50994                  
  B3                    1.50994                  
  B4                    1.89772                  
  B5                    1.09024                  
  B6                    1.0919                   
  B7                    1.0919                   
  B8                    1.09024                  
  B9                    1.08374                  
  B10                   1.08374                  
  B11                   1.48193                  
  B12                   1.48257                  
  A1                  119.38338                  
  A2                  119.38338                  
  A3                  101.79261                  
  A4                  111.64819                  
  A5                  110.99091                  
  A6                  110.99091                  
  A7                  111.64819                  
  A8                  120.55055                  
  A9                  120.55055                  
  A10                 114.20605                  
  A11                 111.857                    
  D1                    0.                       
  D2                   -8.15688                  
  D3                  129.30643                  
  D4                 -111.77061                  
  D5                  111.77061                  
  D6                 -129.30643                  
  D7                  179.2033                   
  D8                 -179.2033                   
  D9                  130.70678                  
  D10                -105.86997                  
 
 ITRead=  0  0  0  0  0  0  0  0  0  0  0  0  0
 MicOpt= -1 -1 -1 -1 -1 -1 -1 -1 -1 -1 -1 -1 -1
 NAtoms=     13 NQM=       13 NQMF=       0 NMMI=      0 NMMIF=      0
                NMic=       0 NMicF=      0.
                    Isotopes and Nuclear Properties:
 (Nuclear quadrupole moments (NQMom) in fm**2, nuclear magnetic moments (NMagM)
  in nuclear magnetons)

  Atom         1           2           3           4           5           6           7           8           9          10
 IAtWgt=          12          12          12          12          28           1           1           1           1           1
 AtmWgt=  12.0000000  12.0000000  12.0000000  12.0000000  27.9769284   1.0078250   1.0078250   1.0078250   1.0078250   1.0078250
 NucSpn=           0           0           0           0           0           1           1           1           1           1
 AtZEff=  -0.0000000  -0.0000000  -0.0000000  -0.0000000  -0.0000000  -0.0000000  -0.0000000  -0.0000000  -0.0000000  -0.0000000
 NQMom=    0.0000000   0.0000000   0.0000000   0.0000000   0.0000000   0.0000000   0.0000000   0.0000000   0.0000000   0.0000000
 NMagM=    0.0000000   0.0000000   0.0000000   0.0000000   0.0000000   2.7928460   2.7928460   2.7928460   2.7928460   2.7928460
 AtZNuc=   6.0000000   6.0000000   6.0000000   6.0000000  14.0000000   1.0000000   1.0000000   1.0000000   1.0000000   1.0000000

  Atom        11          12          13
 IAtWgt=           1           1           1
 AtmWgt=   1.0078250   1.0078250   1.0078250
 NucSpn=           1           1           1
 AtZEff=  -0.0000000  -0.0000000  -0.0000000
 NQMom=    0.0000000   0.0000000   0.0000000
 NMagM=    2.7928460   2.7928460   2.7928460
 AtZNuc=   1.0000000   1.0000000   1.0000000
 Leave Link  101 at Fri Nov 20 17:35:42 2020, MaxMem=  7340032000 cpu:              14.1 elap:               1.0
 (Enter /share/apps/Gaussian/g16_b01/g16/l103.exe)

 GradGradGradGradGradGradGradGradGradGradGradGradGradGradGradGradGradGrad
 Berny optimization.
 Initialization pass.
                           ----------------------------
                           !    Initial Parameters    !
                           ! (Angstroms and Degrees)  !
 --------------------------                            --------------------------
 ! Name  Definition              Value          Derivative Info.                !
 --------------------------------------------------------------------------------
 ! R1    R(1,2)                  1.3423         estimate D2E/DX2                !
 ! R2    R(1,4)                  1.5099         estimate D2E/DX2                !
 ! R3    R(1,11)                 1.0837         estimate D2E/DX2                !
 ! R4    R(2,3)                  1.5099         estimate D2E/DX2                !
 ! R5    R(2,10)                 1.0837         estimate D2E/DX2                !
 ! R6    R(3,5)                  1.8977         estimate D2E/DX2                !
 ! R7    R(3,8)                  1.0919         estimate D2E/DX2                !
 ! R8    R(3,9)                  1.0902         estimate D2E/DX2                !
 ! R9    R(4,5)                  1.8977         estimate D2E/DX2                !
 ! R10   R(4,6)                  1.0902         estimate D2E/DX2                !
 ! R11   R(4,7)                  1.0919         estimate D2E/DX2                !
 ! R12   R(5,12)                 1.4819         estimate D2E/DX2                !
 ! R13   R(5,13)                 1.4826         estimate D2E/DX2                !
 ! A1    A(2,1,4)              119.3834         estimate D2E/DX2                !
 ! A2    A(2,1,11)             120.5505         estimate D2E/DX2                !
 ! A3    A(4,1,11)             120.0613         estimate D2E/DX2                !
 ! A4    A(1,2,3)              119.3834         estimate D2E/DX2                !
 ! A5    A(1,2,10)             120.5505         estimate D2E/DX2                !
 ! A6    A(3,2,10)             120.0613         estimate D2E/DX2                !
 ! A7    A(2,3,5)              101.7926         estimate D2E/DX2                !
 ! A8    A(2,3,8)              110.9909         estimate D2E/DX2                !
 ! A9    A(2,3,9)              111.6482         estimate D2E/DX2                !
 ! A10   A(5,3,8)              112.5044         estimate D2E/DX2                !
 ! A11   A(5,3,9)              113.2814         estimate D2E/DX2                !
 ! A12   A(8,3,9)              106.7107         estimate D2E/DX2                !
 ! A13   A(1,4,5)              101.7926         estimate D2E/DX2                !
 ! A14   A(1,4,6)              111.6482         estimate D2E/DX2                !
 ! A15   A(1,4,7)              110.9909         estimate D2E/DX2                !
 ! A16   A(5,4,6)              113.2814         estimate D2E/DX2                !
 ! A17   A(5,4,7)              112.5044         estimate D2E/DX2                !
 ! A18   A(6,4,7)              106.7107         estimate D2E/DX2                !
 ! A19   A(3,5,4)               96.1571         estimate D2E/DX2                !
 ! A20   A(3,5,12)             114.2061         estimate D2E/DX2                !
 ! A21   A(3,5,13)             111.857          estimate D2E/DX2                !
 ! A22   A(4,5,12)             114.2061         estimate D2E/DX2                !
 ! A23   A(4,5,13)             111.857          estimate D2E/DX2                !
 ! A24   A(12,5,13)            108.2781         estimate D2E/DX2                !
 ! D1    D(4,1,2,3)              0.0            estimate D2E/DX2                !
 ! D2    D(4,1,2,10)           179.2033         estimate D2E/DX2                !
 ! D3    D(11,1,2,3)          -179.2033         estimate D2E/DX2                !
 ! D4    D(11,1,2,10)            0.0            estimate D2E/DX2                !
 ! D5    D(2,1,4,5)              8.1569         estimate D2E/DX2                !
 ! D6    D(2,1,4,6)            129.3064         estimate D2E/DX2                !
 ! D7    D(2,1,4,7)           -111.7706         estimate D2E/DX2                !
 ! D8    D(11,1,4,5)          -172.6358         estimate D2E/DX2                !
 ! D9    D(11,1,4,6)           -51.4863         estimate D2E/DX2                !
 ! D10   D(11,1,4,7)            67.4367         estimate D2E/DX2                !
 ! D11   D(1,2,3,5)             -8.1569         estimate D2E/DX2                !
 ! D12   D(1,2,3,8)            111.7706         estimate D2E/DX2                !
 ! D13   D(1,2,3,9)           -129.3064         estimate D2E/DX2                !
 ! D14   D(10,2,3,5)           172.6358         estimate D2E/DX2                !
 ! D15   D(10,2,3,8)           -67.4367         estimate D2E/DX2                !
 ! D16   D(10,2,3,9)            51.4863         estimate D2E/DX2                !
 ! D17   D(2,3,5,4)             10.6638         estimate D2E/DX2                !
 ! D18   D(2,3,5,12)           130.7068         estimate D2E/DX2                !
 ! D19   D(2,3,5,13)          -105.87           estimate D2E/DX2                !
 ! D20   D(8,3,5,4)           -108.1918         estimate D2E/DX2                !
 ! D21   D(8,3,5,12)            11.8512         estimate D2E/DX2                !
 ! D22   D(8,3,5,13)           135.2744         estimate D2E/DX2                !
 ! D23   D(9,3,5,4)            130.6704         estimate D2E/DX2                !
 ! D24   D(9,3,5,12)          -109.2866         estimate D2E/DX2                !
 ! D25   D(9,3,5,13)            14.1366         estimate D2E/DX2                !
 ! D26   D(1,4,5,3)            -10.6638         estimate D2E/DX2                !
 ! D27   D(1,4,5,12)          -130.7068         estimate D2E/DX2                !
 ! D28   D(1,4,5,13)           105.87           estimate D2E/DX2                !
 ! D29   D(6,4,5,3)           -130.6704         estimate D2E/DX2                !
 ! D30   D(6,4,5,12)           109.2866         estimate D2E/DX2                !
 ! D31   D(6,4,5,13)           -14.1366         estimate D2E/DX2                !
 ! D32   D(7,4,5,3)            108.1918         estimate D2E/DX2                !
 ! D33   D(7,4,5,12)           -11.8512         estimate D2E/DX2                !
 ! D34   D(7,4,5,13)          -135.2744         estimate D2E/DX2                !
 --------------------------------------------------------------------------------
 Trust Radius=3.00D-01 FncErr=1.00D-07 GrdErr=1.00D-07 EigMax=2.50D+02 EigMin=1.00D-04
 Number of steps in this run=     81 maximum allowed number of steps=    100.
 GradGradGradGradGradGradGradGradGradGradGradGradGradGradGradGradGradGrad

 Leave Link  103 at Fri Nov 20 17:35:42 2020, MaxMem=  7340032000 cpu:               0.4 elap:               0.1
 (Enter /share/apps/Gaussian/g16_b01/g16/l202.exe)
                          Input orientation:                          
 ---------------------------------------------------------------------
 Center     Atomic      Atomic             Coordinates (Angstroms)
 Number     Number       Type             X           Y           Z
 ---------------------------------------------------------------------
      1          6           0        0.000000    0.000000    0.000000
      2          6           0        0.000000    0.000000    1.342330
      3          6           0        1.315698    0.000000    2.083185
      4          6           0        1.315698    0.000000   -0.740855
      5         14           0        2.555886   -0.263573    0.671165
      6          1           0        1.351196   -0.784089   -1.497530
      7          1           0        1.471005    0.946730   -1.262230
      8          1           0        1.471005    0.946730    2.604560
      9          1           0        1.351196   -0.784089    2.839860
     10          1           0       -0.933204    0.012977    1.893192
     11          1           0       -0.933204    0.012977   -0.550862
     12          1           0        3.688712    0.691848    0.671165
     13          1           0        3.108053   -1.639485    0.671165
 ---------------------------------------------------------------------
                    Distance matrix (angstroms):
                    1          2          3          4          5
     1  C    0.000000
     2  C    1.342330   0.000000
     3  C    2.463883   1.509943   0.000000
     4  C    1.509943   2.463883   2.824040   0.000000
     5  Si   2.655652   2.655652   1.897719   1.897719   0.000000
     6  H    2.164052   3.241193   3.665730   1.090235   2.534848
     7  H    2.157169   3.137497   3.480261   1.091902   2.525830
     8  H    3.137497   2.157169   1.091902   3.480261   2.525830
     9  H    3.241193   2.164052   1.090235   3.665730   2.534848
    10  H    2.110738   1.083738   2.256951   3.463514   3.707233
    11  H    1.083738   2.110738   3.463514   2.256951   3.707233
    12  H    3.812573   3.812573   2.846691   2.846691   1.481933
    13  H    3.577481   3.577481   2.809670   2.809670   1.482573
                    6          7          8          9         10
     6  H    0.000000
     7  H    1.750844   0.000000
     8  H    4.453901   3.866790   0.000000
     9  H    4.337390   4.453901   1.750844   0.000000
    10  H    4.165428   4.075390   2.675474   2.598072   0.000000
    11  H    2.598072   2.675474   4.075390   4.165428   2.444054
    12  H    3.513632   2.953169   2.953169   3.513632   4.828698
    13  H    2.919159   3.620283   3.620283   2.919159   4.533844
                   11         12         13
    11  H    0.000000
    12  H    4.828698   0.000000
    13  H    4.533844   2.402557   0.000000
 Stoichiometry    C4H8Si
 Framework group  CS[SG(H2Si),X(C4H6)]
 Deg. of freedom    18
 Full point group                 CS      NOp   2
 Largest Abelian subgroup         CS      NOp   2
 Largest concise Abelian subgroup CS      NOp   2
                         Standard orientation:                         
 ---------------------------------------------------------------------
 Center     Atomic      Atomic             Coordinates (Angstroms)
 Number     Number       Type             X           Y           Z
 ---------------------------------------------------------------------
      1          6           0       -0.093183    1.350990    0.671165
      2          6           0       -0.093183    1.350990   -0.671165
      3          6           0       -0.093183    0.035292   -1.412020
      4          6           0       -0.093183    0.035292    1.412020
      5         14           0        0.170390   -1.204896    0.000000
      6          1           0        0.690906   -0.000206    2.168695
      7          1           0       -1.039913   -0.120015    1.933395
      8          1           0       -1.039913   -0.120015   -1.933395
      9          1           0        0.690906   -0.000206   -2.168695
     10          1           0       -0.106160    2.284194   -1.222027
     11          1           0       -0.106160    2.284194    1.222027
     12          1           0       -0.785031   -2.337722    0.000000
     13          1           0        1.546302   -1.757063    0.000000
 ---------------------------------------------------------------------
 Rotational constants (GHZ):           5.9394289           4.5513663           2.7567511
 Leave Link  202 at Fri Nov 20 17:35:43 2020, MaxMem=  7340032000 cpu:               0.3 elap:               0.1
 (Enter /share/apps/Gaussian/g16_b01/g16/l301.exe)
 Standard basis: CC-pVTZ (5D, 7F)
 Ernie: Thresh=  0.10000D-02 Tol=  0.10000D-05 Strict=F.
 Ernie:  24 primitive shells out of 228 were deleted.
 AO basis set (Overlap normalization):
 Atom C1       Shell     1 S   7     bf    1 -     1         -0.176090555144          2.553001051132          1.268318036140
      0.8236000000D+04  0.5419783203D-03
      0.1235000000D+04  0.4192873817D-02
      0.2808000000D+03  0.2152216205D-01
      0.7927000000D+02  0.8353432195D-01
      0.2559000000D+02  0.2395828457D+00
      0.8997000000D+01  0.4428528419D+00
      0.3319000000D+01  0.3517995618D+00
 Atom C1       Shell     2 S   6     bf    2 -     2         -0.176090555144          2.553001051132          1.268318036140
      0.2808000000D+03 -0.5949224937D-04
      0.7927000000D+02 -0.1148158310D-02
      0.2559000000D+02 -0.1001913745D-01
      0.8997000000D+01 -0.6121949230D-01
      0.3319000000D+01 -0.1732698541D+00
      0.3643000000D+00  0.1072915192D+01
 Atom C1       Shell     3 S   1     bf    3 -     3         -0.176090555144          2.553001051132          1.268318036140
      0.9059000000D+00  0.1000000000D+01
 Atom C1       Shell     4 S   1     bf    4 -     4         -0.176090555144          2.553001051132          1.268318036140
      0.1285000000D+00  0.1000000000D+01
 Atom C1       Shell     5 P   3     bf    5 -     7         -0.176090555144          2.553001051132          1.268318036140
      0.1871000000D+02  0.3942638716D-01
      0.4133000000D+01  0.2440889849D+00
      0.1200000000D+01  0.8154920089D+00
 Atom C1       Shell     6 P   1     bf    8 -    10         -0.176090555144          2.553001051132          1.268318036140
      0.3827000000D+00  0.1000000000D+01
 Atom C1       Shell     7 P   1     bf   11 -    13         -0.176090555144          2.553001051132          1.268318036140
      0.1209000000D+00  0.1000000000D+01
 Atom C1       Shell     8 D   1     bf   14 -    18         -0.176090555144          2.553001051132          1.268318036140
      0.1097000000D+01  0.1000000000D+01
 Atom C1       Shell     9 D   1     bf   19 -    23         -0.176090555144          2.553001051132          1.268318036140
      0.3180000000D+00  0.1000000000D+01
 Atom C1       Shell    10 F   1     bf   24 -    30         -0.176090555144          2.553001051132          1.268318036140
      0.7610000000D+00  0.1000000000D+01
 Atom C2       Shell    11 S   7     bf   31 -    31         -0.176090555144          2.553001051132         -1.268318036140
      0.8236000000D+04  0.5419783203D-03
      0.1235000000D+04  0.4192873817D-02
      0.2808000000D+03  0.2152216205D-01
      0.7927000000D+02  0.8353432195D-01
      0.2559000000D+02  0.2395828457D+00
      0.8997000000D+01  0.4428528419D+00
      0.3319000000D+01  0.3517995618D+00
 Atom C2       Shell    12 S   6     bf   32 -    32         -0.176090555144          2.553001051132         -1.268318036140
      0.2808000000D+03 -0.5949224937D-04
      0.7927000000D+02 -0.1148158310D-02
      0.2559000000D+02 -0.1001913745D-01
      0.8997000000D+01 -0.6121949230D-01
      0.3319000000D+01 -0.1732698541D+00
      0.3643000000D+00  0.1072915192D+01
 Atom C2       Shell    13 S   1     bf   33 -    33         -0.176090555144          2.553001051132         -1.268318036140
      0.9059000000D+00  0.1000000000D+01
 Atom C2       Shell    14 S   1     bf   34 -    34         -0.176090555144          2.553001051132         -1.268318036140
      0.1285000000D+00  0.1000000000D+01
 Atom C2       Shell    15 P   3     bf   35 -    37         -0.176090555144          2.553001051132         -1.268318036140
      0.1871000000D+02  0.3942638716D-01
      0.4133000000D+01  0.2440889849D+00
      0.1200000000D+01  0.8154920089D+00
 Atom C2       Shell    16 P   1     bf   38 -    40         -0.176090555144          2.553001051132         -1.268318036140
      0.3827000000D+00  0.1000000000D+01
 Atom C2       Shell    17 P   1     bf   41 -    43         -0.176090555144          2.553001051132         -1.268318036140
      0.1209000000D+00  0.1000000000D+01
 Atom C2       Shell    18 D   1     bf   44 -    48         -0.176090555144          2.553001051132         -1.268318036140
      0.1097000000D+01  0.1000000000D+01
 Atom C2       Shell    19 D   1     bf   49 -    53         -0.176090555144          2.553001051132         -1.268318036140
      0.3180000000D+00  0.1000000000D+01
 Atom C2       Shell    20 F   1     bf   54 -    60         -0.176090555144          2.553001051132         -1.268318036140
      0.7610000000D+00  0.1000000000D+01
 Atom C3       Shell    21 S   7     bf   61 -    61         -0.176090555144          0.066692176333         -2.668331080306
      0.8236000000D+04  0.5419783203D-03
      0.1235000000D+04  0.4192873817D-02
      0.2808000000D+03  0.2152216205D-01
      0.7927000000D+02  0.8353432195D-01
      0.2559000000D+02  0.2395828457D+00
      0.8997000000D+01  0.4428528419D+00
      0.3319000000D+01  0.3517995618D+00
 Atom C3       Shell    22 S   6     bf   62 -    62         -0.176090555144          0.066692176333         -2.668331080306
      0.2808000000D+03 -0.5949224937D-04
      0.7927000000D+02 -0.1148158310D-02
      0.2559000000D+02 -0.1001913745D-01
      0.8997000000D+01 -0.6121949230D-01
      0.3319000000D+01 -0.1732698541D+00
      0.3643000000D+00  0.1072915192D+01
 Atom C3       Shell    23 S   1     bf   63 -    63         -0.176090555144          0.066692176333         -2.668331080306
      0.9059000000D+00  0.1000000000D+01
 Atom C3       Shell    24 S   1     bf   64 -    64         -0.176090555144          0.066692176333         -2.668331080306
      0.1285000000D+00  0.1000000000D+01
 Atom C3       Shell    25 P   3     bf   65 -    67         -0.176090555144          0.066692176333         -2.668331080306
      0.1871000000D+02  0.3942638716D-01
      0.4133000000D+01  0.2440889849D+00
      0.1200000000D+01  0.8154920089D+00
 Atom C3       Shell    26 P   1     bf   68 -    70         -0.176090555144          0.066692176333         -2.668331080306
      0.3827000000D+00  0.1000000000D+01
 Atom C3       Shell    27 P   1     bf   71 -    73         -0.176090555144          0.066692176333         -2.668331080306
      0.1209000000D+00  0.1000000000D+01
 Atom C3       Shell    28 D   1     bf   74 -    78         -0.176090555144          0.066692176333         -2.668331080306
      0.1097000000D+01  0.1000000000D+01
 Atom C3       Shell    29 D   1     bf   79 -    83         -0.176090555144          0.066692176333         -2.668331080306
      0.3180000000D+00  0.1000000000D+01
 Atom C3       Shell    30 F   1     bf   84 -    90         -0.176090555144          0.066692176333         -2.668331080306
      0.7610000000D+00  0.1000000000D+01
 Atom C4       Shell    31 S   7     bf   91 -    91         -0.176090555144          0.066692176333          2.668331080306
      0.8236000000D+04  0.5419783203D-03
      0.1235000000D+04  0.4192873817D-02
      0.2808000000D+03  0.2152216205D-01
      0.7927000000D+02  0.8353432195D-01
      0.2559000000D+02  0.2395828457D+00
      0.8997000000D+01  0.4428528419D+00
      0.3319000000D+01  0.3517995618D+00
 Atom C4       Shell    32 S   6     bf   92 -    92         -0.176090555144          0.066692176333          2.668331080306
      0.2808000000D+03 -0.5949224937D-04
      0.7927000000D+02 -0.1148158310D-02
      0.2559000000D+02 -0.1001913745D-01
      0.8997000000D+01 -0.6121949230D-01
      0.3319000000D+01 -0.1732698541D+00
      0.3643000000D+00  0.1072915192D+01
 Atom C4       Shell    33 S   1     bf   93 -    93         -0.176090555144          0.066692176333          2.668331080306
      0.9059000000D+00  0.1000000000D+01
 Atom C4       Shell    34 S   1     bf   94 -    94         -0.176090555144          0.066692176333          2.668331080306
      0.1285000000D+00  0.1000000000D+01
 Atom C4       Shell    35 P   3     bf   95 -    97         -0.176090555144          0.066692176333          2.668331080306
      0.1871000000D+02  0.3942638716D-01
      0.4133000000D+01  0.2440889849D+00
      0.1200000000D+01  0.8154920089D+00
 Atom C4       Shell    36 P   1     bf   98 -   100         -0.176090555144          0.066692176333          2.668331080306
      0.3827000000D+00  0.1000000000D+01
 Atom C4       Shell    37 P   1     bf  101 -   103         -0.176090555144          0.066692176333          2.668331080306
      0.1209000000D+00  0.1000000000D+01
 Atom C4       Shell    38 D   1     bf  104 -   108         -0.176090555144          0.066692176333          2.668331080306
      0.1097000000D+01  0.1000000000D+01
 Atom C4       Shell    39 D   1     bf  109 -   113         -0.176090555144          0.066692176333          2.668331080306
      0.3180000000D+00  0.1000000000D+01
 Atom C4       Shell    40 F   1     bf  114 -   120         -0.176090555144          0.066692176333          2.668331080306
      0.7610000000D+00  0.1000000000D+01
 Atom Si5      Shell    41 S  11     bf  121 -   121          0.321990228878         -2.276923487995         -0.000000000000
      0.2549000000D+06  0.6238088535D-04
      0.3819000000D+05  0.4845466693D-03
      0.8690000000D+04  0.2539893209D-02
      0.2462000000D+04  0.1056456546D-01
      0.8048000000D+03  0.3680078696D-01
      0.2913000000D+03  0.1072426597D+00
      0.1136000000D+03  0.2473382989D+00
      0.4675000000D+02  0.3897534068D+00
      0.1982000000D+02  0.3006716394D+00
      0.7708000000D+01  0.5650090631D-01
      0.1402000000D+01  0.6226991515D-02
 Atom Si5      Shell    42 S   9     bf  122 -   122          0.321990228878         -2.276923487995         -0.000000000000
      0.2462000000D+04 -0.1752058729D-04
      0.8048000000D+03 -0.2181197954D-03
      0.2913000000D+03 -0.1903662287D-02
      0.1136000000D+03 -0.1154945923D-01
      0.4675000000D+02 -0.4976382836D-01
      0.1982000000D+02 -0.9938072155D-01
      0.7708000000D+01  0.9431175782D-01
      0.3340000000D+01  0.5435385708D+00
      0.1402000000D+01  0.4759770115D+00
 Atom Si5      Shell    43 S   9     bf  123 -   123          0.321990228878         -2.276923487995         -0.000000000000
      0.2462000000D+04 -0.1686141182D-05
      0.8048000000D+03  0.4746598974D-05
      0.1136000000D+03  0.2340735485D-03
      0.4675000000D+02  0.9113181297D-03
      0.1982000000D+02  0.4034121524D-02
      0.7708000000D+01 -0.5457607873D-02
      0.3340000000D+01 -0.7221273589D-01
      0.1402000000D+01 -0.3182587179D+00
      0.2070000000D+00  0.1142213504D+01
 Atom Si5      Shell    44 S   1     bf  124 -   124          0.321990228878         -2.276923487995         -0.000000000000
      0.4387000000D+00  0.1000000000D+01
 Atom Si5      Shell    45 S   1     bf  125 -   125          0.321990228878         -2.276923487995         -0.000000000000
      0.7944000000D-01  0.1000000000D+01
 Atom Si5      Shell    46 P   6     bf  126 -   128          0.321990228878         -2.276923487995         -0.000000000000
      0.4815000000D+03  0.2085549471D-02
      0.1139000000D+03  0.1667619837D-01
      0.3623000000D+02  0.7753893526D-01
      0.1334000000D+02  0.2313987378D+00
      0.5252000000D+01  0.4239367733D+00
      0.2120000000D+01  0.4277947460D+00
 Atom Si5      Shell    47 P   6     bf  129 -   131          0.321990228878         -2.276923487995         -0.000000000000
      0.1139000000D+03 -0.2184944274D-03
      0.3623000000D+02 -0.4051387665D-03
      0.1334000000D+02 -0.7285939736D-02
      0.5252000000D+01 -0.5757615037D-02
      0.2120000000D+01 -0.5337060557D-01
      0.2528000000D+00  0.1015139649D+01
 Atom Si5      Shell    48 P   1     bf  132 -   134          0.321990228878         -2.276923487995         -0.000000000000
      0.8561000000D+00  0.1000000000D+01
 Atom Si5      Shell    49 P   1     bf  135 -   137          0.321990228878         -2.276923487995         -0.000000000000
      0.7889000000D-01  0.1000000000D+01
 Atom Si5      Shell    50 D   1     bf  138 -   142          0.321990228878         -2.276923487995         -0.000000000000
      0.1590000000D+00  0.1000000000D+01
 Atom Si5      Shell    51 D   1     bf  143 -   147          0.321990228878         -2.276923487995         -0.000000000000
      0.4810000000D+00  0.1000000000D+01
 Atom Si5      Shell    52 F   1     bf  148 -   154          0.321990228878         -2.276923487995         -0.000000000000
      0.3360000000D+00  0.1000000000D+01
 Atom H6       Shell    53 S   3     bf  155 -   155          1.305622914026         -0.000389326812          4.098239596439
      0.3387000000D+02  0.2549486323D-01
      0.5095000000D+01  0.1903627659D+00
      0.1159000000D+01  0.8521620222D+00
 Atom H6       Shell    54 S   1     bf  156 -   156          1.305622914026         -0.000389326812          4.098239596439
      0.3258000000D+00  0.1000000000D+01
 Atom H6       Shell    55 S   1     bf  157 -   157          1.305622914026         -0.000389326812          4.098239596439
      0.1027000000D+00  0.1000000000D+01
 Atom H6       Shell    56 P   1     bf  158 -   160          1.305622914026         -0.000389326812          4.098239596439
      0.1407000000D+01  0.1000000000D+01
 Atom H6       Shell    57 P   1     bf  161 -   163          1.305622914026         -0.000389326812          4.098239596439
      0.3880000000D+00  0.1000000000D+01
 Atom H6       Shell    58 D   1     bf  164 -   168          1.305622914026         -0.000389326812          4.098239596439
      0.1057000000D+01  0.1000000000D+01
 Atom H7       Shell    59 S   3     bf  169 -   169         -1.965150967689         -0.226795524096          3.653587037370
      0.3387000000D+02  0.2549486323D-01
      0.5095000000D+01  0.1903627659D+00
      0.1159000000D+01  0.8521620222D+00
 Atom H7       Shell    60 S   1     bf  170 -   170         -1.965150967689         -0.226795524096          3.653587037370
      0.3258000000D+00  0.1000000000D+01
 Atom H7       Shell    61 S   1     bf  171 -   171         -1.965150967689         -0.226795524096          3.653587037370
      0.1027000000D+00  0.1000000000D+01
 Atom H7       Shell    62 P   1     bf  172 -   174         -1.965150967689         -0.226795524096          3.653587037370
      0.1407000000D+01  0.1000000000D+01
 Atom H7       Shell    63 P   1     bf  175 -   177         -1.965150967689         -0.226795524096          3.653587037370
      0.3880000000D+00  0.1000000000D+01
 Atom H7       Shell    64 D   1     bf  178 -   182         -1.965150967689         -0.226795524096          3.653587037370
      0.1057000000D+01  0.1000000000D+01
 Atom H8       Shell    65 S   3     bf  183 -   183         -1.965150967689         -0.226795524096         -3.653587037370
      0.3387000000D+02  0.2549486323D-01
      0.5095000000D+01  0.1903627659D+00
      0.1159000000D+01  0.8521620222D+00
 Atom H8       Shell    66 S   1     bf  184 -   184         -1.965150967689         -0.226795524096         -3.653587037370
      0.3258000000D+00  0.1000000000D+01
 Atom H8       Shell    67 S   1     bf  185 -   185         -1.965150967689         -0.226795524096         -3.653587037370
      0.1027000000D+00  0.1000000000D+01
 Atom H8       Shell    68 P   1     bf  186 -   188         -1.965150967689         -0.226795524096         -3.653587037370
      0.1407000000D+01  0.1000000000D+01
 Atom H8       Shell    69 P   1     bf  189 -   191         -1.965150967689         -0.226795524096         -3.653587037370
      0.3880000000D+00  0.1000000000D+01
 Atom H8       Shell    70 D   1     bf  192 -   196         -1.965150967689         -0.226795524096         -3.653587037370
      0.1057000000D+01  0.1000000000D+01
 Atom H9       Shell    71 S   3     bf  197 -   197          1.305622914026         -0.000389326812         -4.098239596439
      0.3387000000D+02  0.2549486323D-01
      0.5095000000D+01  0.1903627659D+00
      0.1159000000D+01  0.8521620222D+00
 Atom H9       Shell    72 S   1     bf  198 -   198          1.305622914026         -0.000389326812         -4.098239596439
      0.3258000000D+00  0.1000000000D+01
 Atom H9       Shell    73 S   1     bf  199 -   199          1.305622914026         -0.000389326812         -4.098239596439
      0.1027000000D+00  0.1000000000D+01
 Atom H9       Shell    74 P   1     bf  200 -   202          1.305622914026         -0.000389326812         -4.098239596439
      0.1407000000D+01  0.1000000000D+01
 Atom H9       Shell    75 P   1     bf  203 -   205          1.305622914026         -0.000389326812         -4.098239596439
      0.3880000000D+00  0.1000000000D+01
 Atom H9       Shell    76 D   1     bf  206 -   210          1.305622914026         -0.000389326812         -4.098239596439
      0.1057000000D+01  0.1000000000D+01
 Atom H10      Shell    77 S   3     bf  211 -   211         -0.200613531494          4.316501035595         -2.309296345737
      0.3387000000D+02  0.2549486323D-01
      0.5095000000D+01  0.1903627659D+00
      0.1159000000D+01  0.8521620222D+00
 Atom H10      Shell    78 S   1     bf  212 -   212         -0.200613531494          4.316501035595         -2.309296345737
      0.3258000000D+00  0.1000000000D+01
 Atom H10      Shell    79 S   1     bf  213 -   213         -0.200613531494          4.316501035595         -2.309296345737
      0.1027000000D+00  0.1000000000D+01
 Atom H10      Shell    80 P   1     bf  214 -   216         -0.200613531494          4.316501035595         -2.309296345737
      0.1407000000D+01  0.1000000000D+01
 Atom H10      Shell    81 P   1     bf  217 -   219         -0.200613531494          4.316501035595         -2.309296345737
      0.3880000000D+00  0.1000000000D+01
 Atom H10      Shell    82 D   1     bf  220 -   224         -0.200613531494          4.316501035595         -2.309296345737
      0.1057000000D+01  0.1000000000D+01
 Atom H11      Shell    83 S   3     bf  225 -   225         -0.200613531494          4.316501035595          2.309296345737
      0.3387000000D+02  0.2549486323D-01
      0.5095000000D+01  0.1903627659D+00
      0.1159000000D+01  0.8521620222D+00
 Atom H11      Shell    84 S   1     bf  226 -   226         -0.200613531494          4.316501035595          2.309296345737
      0.3258000000D+00  0.1000000000D+01
 Atom H11      Shell    85 S   1     bf  227 -   227         -0.200613531494          4.316501035595          2.309296345737
      0.1027000000D+00  0.1000000000D+01
 Atom H11      Shell    86 P   1     bf  228 -   230         -0.200613531494          4.316501035595          2.309296345737
      0.1407000000D+01  0.1000000000D+01
 Atom H11      Shell    87 P   1     bf  231 -   233         -0.200613531494          4.316501035595          2.309296345737
      0.3880000000D+00  0.1000000000D+01
 Atom H11      Shell    88 D   1     bf  234 -   238         -0.200613531494          4.316501035595          2.309296345737
      0.1057000000D+01  0.1000000000D+01
 Atom H12      Shell    89 S   3     bf  239 -   239         -1.483493790445         -4.417654370059          0.000000000000
      0.3387000000D+02  0.2549486323D-01
      0.5095000000D+01  0.1903627659D+00
      0.1159000000D+01  0.8521620222D+00
 Atom H12      Shell    90 S   1     bf  240 -   240         -1.483493790445         -4.417654370059          0.000000000000
      0.3258000000D+00  0.1000000000D+01
 Atom H12      Shell    91 S   1     bf  241 -   241         -1.483493790445         -4.417654370059          0.000000000000
      0.1027000000D+00  0.1000000000D+01
 Atom H12      Shell    92 P   1     bf  242 -   244         -1.483493790445         -4.417654370059          0.000000000000
      0.1407000000D+01  0.1000000000D+01
 Atom H12      Shell    93 P   1     bf  245 -   247         -1.483493790445         -4.417654370059          0.000000000000
      0.3880000000D+00  0.1000000000D+01
 Atom H12      Shell    94 D   1     bf  248 -   252         -1.483493790445         -4.417654370059          0.000000000000
      0.1057000000D+01  0.1000000000D+01
 Atom H13      Shell    95 S   3     bf  253 -   253          2.922087079514         -3.320367892222          0.000000000000
      0.3387000000D+02  0.2549486323D-01
      0.5095000000D+01  0.1903627659D+00
      0.1159000000D+01  0.8521620222D+00
 Atom H13      Shell    96 S   1     bf  254 -   254          2.922087079514         -3.320367892222          0.000000000000
      0.3258000000D+00  0.1000000000D+01
 Atom H13      Shell    97 S   1     bf  255 -   255          2.922087079514         -3.320367892222          0.000000000000
      0.1027000000D+00  0.1000000000D+01
 Atom H13      Shell    98 P   1     bf  256 -   258          2.922087079514         -3.320367892222          0.000000000000
      0.1407000000D+01  0.1000000000D+01
 Atom H13      Shell    99 P   1     bf  259 -   261          2.922087079514         -3.320367892222          0.000000000000
      0.3880000000D+00  0.1000000000D+01
 Atom H13      Shell   100 D   1     bf  262 -   266          2.922087079514         -3.320367892222          0.000000000000
      0.1057000000D+01  0.1000000000D+01
 There are   164 symmetry adapted cartesian basis functions of A'  symmetry.
 There are   135 symmetry adapted cartesian basis functions of A"  symmetry.
 There are   145 symmetry adapted basis functions of A'  symmetry.
 There are   121 symmetry adapted basis functions of A"  symmetry.
   266 basis functions,   439 primitive gaussians,   299 cartesian basis functions
    23 alpha electrons       23 beta electrons
       nuclear repulsion energy       218.7886311509 Hartrees.
 IExCor=    0 DFT=F Ex=HF Corr=None ExCW=0 ScaHFX=  1.000000
 ScaDFX=  1.000000  1.000000  1.000000  1.000000 ScalE2=  1.000000  1.000000
 IRadAn=      5 IRanWt=     -1 IRanGd=            0 ICorTp=0 IEmpDi=  4
 NAtoms=   13 NActive=   13 NUniq=    8 SFac= 2.64D+00 NAtFMM=   60 NAOKFM=F Big=F
 Integral buffers will be    131072 words long.
 Raffenetti 1 integral format.
 Two-electron integral symmetry is turned on.
 Leave Link  301 at Fri Nov 20 17:35:43 2020, MaxMem=  7340032000 cpu:               2.2 elap:               0.2
 (Enter /share/apps/Gaussian/g16_b01/g16/l302.exe)
 NPDir=0 NMtPBC=     1 NCelOv=     1 NCel=       1 NClECP=     1 NCelD=      1
         NCelK=      1 NCelE2=     1 NClLst=     1 CellRange=     0.0.
 One-electron integrals computed using PRISM.
 One-electron integral symmetry used in STVInt
 NBasis=   266 RedAO= T EigKep=  2.84D-04  NBF=   145   121
 NBsUse=   266 1.00D-06 EigRej= -1.00D+00 NBFU=   145   121
 Leave Link  302 at Fri Nov 20 17:35:44 2020, MaxMem=  7340032000 cpu:               6.6 elap:               0.5
 (Enter /share/apps/Gaussian/g16_b01/g16/l303.exe)
 DipDrv:  MaxL=1.
 Leave Link  303 at Fri Nov 20 17:35:45 2020, MaxMem=  7340032000 cpu:               1.4 elap:               0.2
 (Enter /share/apps/Gaussian/g16_b01/g16/l401.exe)
 ExpMin= 7.89D-02 ExpMax= 2.55D+05 ExpMxC= 2.46D+03 IAcc=3 IRadAn=         5 AccDes= 0.00D+00
 Harris functional with IExCor=  205 and IRadAn=       5 diagonalized for initial guess.
 HarFok:  IExCor=  205 AccDes= 0.00D+00 IRadAn=         5 IDoV= 1 UseB2=F ITyADJ=14
 ICtDFT=  3500011 ScaDFX=  1.000000  1.000000  1.000000  1.000000
 FoFCou: FMM=F IPFlag=           0 FMFlag=      100000 FMFlg1=           0
         NFxFlg=           0 DoJE=T BraDBF=F KetDBF=T FulRan=T
         wScrn=  0.000000 ICntrl=       500 IOpCl=  0 I1Cent=   200000004 NGrid=           0
         NMat0=    1 NMatS0=      1 NMatT0=    0 NMatD0=    1 NMtDS0=    0 NMtDT0=    0
 Petite list used in FoFCou.
 Harris En= -445.217148589727    
 JPrj=0 DoOrth=F DoCkMO=F.
 Initial guess orbital symmetries:
       Occupied  (A') (A') (A") (A') (A") (A') (A') (A') (A") (A')
                 (A") (A') (A") (A') (A') (A') (A') (A") (A") (A")
                 (A') (A') (A')
       Virtual   (A") (A") (A') (A') (A') (A') (A") (A') (A") (A')
                 (A") (A') (A") (A') (A") (A') (A") (A') (A') (A')
                 (A") (A') (A') (A") (A') (A') (A") (A') (A") (A')
                 (A") (A') (A") (A') (A') (A") (A") (A') (A") (A')
                 (A') (A") (A") (A') (A') (A") (A') (A') (A") (A")
                 (A") (A') (A') (A") (A') (A') (A") (A') (A") (A')
                 (A") (A') (A') (A") (A") (A') (A') (A") (A') (A")
                 (A') (A') (A") (A") (A') (A') (A") (A") (A') (A")
                 (A') (A') (A') (A') (A") (A") (A") (A') (A") (A")
                 (A') (A') (A') (A") (A') (A") (A') (A") (A") (A')
                 (A") (A') (A") (A') (A') (A") (A') (A") (A') (A')
                 (A") (A") (A') (A') (A') (A') (A") (A') (A") (A')
                 (A') (A") (A') (A") (A') (A") (A') (A') (A') (A")
                 (A') (A") (A") (A') (A") (A') (A') (A") (A') (A')
                 (A") (A') (A") (A") (A") (A') (A") (A') (A') (A")
                 (A") (A') (A') (A") (A') (A") (A') (A") (A') (A")
                 (A') (A") (A') (A") (A") (A") (A') (A') (A") (A')
                 (A") (A') (A") (A') (A") (A') (A") (A') (A") (A')
                 (A') (A") (A') (A') (A") (A') (A") (A") (A') (A')
                 (A") (A') (A") (A') (A") (A") (A') (A') (A") (A")
                 (A') (A") (A') (A") (A') (A') (A") (A') (A") (A')
                 (A") (A") (A') (A') (A") (A') (A") (A') (A') (A")
                 (A') (A") (A') (A") (A') (A") (A') (A') (A") (A')
                 (A") (A") (A') (A") (A') (A") (A') (A") (A") (A')
                 (A') (A") (A")
 The electronic state of the initial guess is 1-A'.
 Leave Link  401 at Fri Nov 20 17:35:46 2020, MaxMem=  7340032000 cpu:              15.2 elap:               1.0
 (Enter /share/apps/Gaussian/g16_b01/g16/l502.exe)
 Integral symmetry usage will be decided dynamically.
 Closed shell SCF:
 Using DIIS extrapolation, IDIIS=  1040.
 NGot=  7340032000 LenX=  7339845016 LenY=  7339755174
 Requested convergence on RMS density matrix=1.00D-08 within 128 cycles.
 Requested convergence on MAX density matrix=1.00D-06.
 Requested convergence on             energy=1.00D-06.
 No special actions if energy rises.
 Fock matrices will be formed incrementally for  20 cycles.
 Integral accuracy reduced to 1.0D-05 until final iterations.

 Cycle   1  Pass 0  IDiag  1:
 FoFJK:  IHMeth= 1 ICntrl=       0 DoSepK=F KAlg= 0 I1Cent=           0 FoldK=F
 IRaf= 990000000 NMat=       1 IRICut=       1 DoRegI=T DoRafI=F ISym2E= 1 IDoP0=0 IntGTp=1.
 FoFCou: FMM=F IPFlag=           0 FMFlag=      100000 FMFlg1=           0
         NFxFlg=           0 DoJE=F BraDBF=F KetDBF=F FulRan=T
         wScrn=  0.000000 ICntrl=         0 IOpCl=  0 I1Cent=           0 NGrid=           0
         NMat0=    1 NMatS0=      1 NMatT0=    0 NMatD0=    1 NMtDS0=    0 NMtDT0=    0
 Petite list used in FoFCou.
 E= -444.803578137255    
 DIIS: error= 4.03D-02 at cycle   1 NSaved=   1.
 NSaved= 1 IEnMin= 1 EnMin= -444.803578137255     IErMin= 1 ErrMin= 4.03D-02
 ErrMax= 4.03D-02  0.00D+00 EMaxC= 1.00D-01 BMatC= 5.11D-01 BMatP= 5.11D-01
 IDIUse=3 WtCom= 5.97D-01 WtEn= 4.03D-01
 Coeff-Com:  0.100D+01
 Coeff-En:   0.100D+01
 Coeff:      0.100D+01
 Gap=     0.441 Goal=   None    Shift=    0.000
 GapD=    0.441 DampG=2.000 DampE=0.500 DampFc=1.0000 IDamp=-1.
 RMSDP=1.95D-03 MaxDP=8.58D-02              OVMax= 1.48D-01

 Cycle   2  Pass 0  IDiag  1:
 RMSU=  1.95D-03    CP:  9.98D-01
 E= -445.050977857525     Delta-E=       -0.247399720270 Rises=F Damp=F
 DIIS: error= 2.12D-02 at cycle   2 NSaved=   2.
 NSaved= 2 IEnMin= 2 EnMin= -445.050977857525     IErMin= 2 ErrMin= 2.12D-02
 ErrMax= 2.12D-02  0.00D+00 EMaxC= 1.00D-01 BMatC= 6.31D-02 BMatP= 5.11D-01
 IDIUse=3 WtCom= 7.88D-01 WtEn= 2.12D-01
 Coeff-Com:  0.196D+00 0.804D+00
 Coeff-En:   0.000D+00 0.100D+01
 Coeff:      0.154D+00 0.846D+00
 Gap=     0.518 Goal=   None    Shift=    0.000
 RMSDP=8.50D-04 MaxDP=2.34D-02 DE=-2.47D-01 OVMax= 7.59D-02

 Cycle   3  Pass 0  IDiag  1:
 RMSU=  5.95D-04    CP:  1.00D+00  6.91D-01
 E= -445.107325728296     Delta-E=       -0.056347870771 Rises=F Damp=F
 DIIS: error= 6.78D-03 at cycle   3 NSaved=   3.
 NSaved= 3 IEnMin= 3 EnMin= -445.107325728296     IErMin= 3 ErrMin= 6.78D-03
 ErrMax= 6.78D-03  0.00D+00 EMaxC= 1.00D-01 BMatC= 6.09D-03 BMatP= 6.31D-02
 IDIUse=3 WtCom= 9.32D-01 WtEn= 6.78D-02
 Coeff-Com: -0.228D-01 0.203D+00 0.820D+00
 Coeff-En:   0.000D+00 0.000D+00 0.100D+01
 Coeff:     -0.213D-01 0.189D+00 0.832D+00
 Gap=     0.481 Goal=   None    Shift=    0.000
 RMSDP=1.75D-04 MaxDP=4.54D-03 DE=-5.63D-02 OVMax= 1.75D-02

 Cycle   4  Pass 0  IDiag  1:
 RMSU=  1.07D-04    CP:  1.00D+00  7.59D-01  9.43D-01
 E= -445.113464293644     Delta-E=       -0.006138565348 Rises=F Damp=F
 DIIS: error= 8.57D-04 at cycle   4 NSaved=   4.
 NSaved= 4 IEnMin= 4 EnMin= -445.113464293644     IErMin= 4 ErrMin= 8.57D-04
 ErrMax= 8.57D-04  0.00D+00 EMaxC= 1.00D-01 BMatC= 6.66D-05 BMatP= 6.09D-03
 IDIUse=3 WtCom= 9.91D-01 WtEn= 8.57D-03
 Coeff-Com: -0.436D-02-0.117D-01 0.352D-01 0.981D+00
 Coeff-En:   0.000D+00 0.000D+00 0.000D+00 0.100D+01
 Coeff:     -0.432D-02-0.116D-01 0.349D-01 0.981D+00
 Gap=     0.482 Goal=   None    Shift=    0.000
 RMSDP=5.48D-05 MaxDP=1.61D-03 DE=-6.14D-03 OVMax= 3.75D-03

 Cycle   5  Pass 0  IDiag  1:
 RMSU=  3.20D-05    CP:  1.00D+00  7.55D-01  1.00D+00  1.25D+00
 E= -445.113581787446     Delta-E=       -0.000117493802 Rises=F Damp=F
 DIIS: error= 2.89D-04 at cycle   5 NSaved=   5.
 NSaved= 5 IEnMin= 5 EnMin= -445.113581787446     IErMin= 5 ErrMin= 2.89D-04
 ErrMax= 2.89D-04  0.00D+00 EMaxC= 1.00D-01 BMatC= 5.50D-06 BMatP= 6.66D-05
 IDIUse=3 WtCom= 9.97D-01 WtEn= 2.89D-03
 Coeff-Com:  0.212D-02-0.136D-01-0.636D-01-0.848D-01 0.116D+01
 Coeff-En:   0.000D+00 0.000D+00 0.000D+00 0.000D+00 0.100D+01
 Coeff:      0.211D-02-0.136D-01-0.634D-01-0.846D-01 0.116D+01
 Gap=     0.482 Goal=   None    Shift=    0.000
 RMSDP=2.17D-05 MaxDP=6.38D-04 DE=-1.17D-04 OVMax= 1.26D-03

 Cycle   6  Pass 0  IDiag  1:
 RMSU=  6.14D-06    CP:  1.00D+00  7.55D-01  1.02D+00  1.39D+00  1.31D+00
 E= -445.113595446001     Delta-E=       -0.000013658555 Rises=F Damp=F
 DIIS: error= 3.74D-05 at cycle   6 NSaved=   6.
 NSaved= 6 IEnMin= 6 EnMin= -445.113595446001     IErMin= 6 ErrMin= 3.74D-05
 ErrMax= 3.74D-05  0.00D+00 EMaxC= 1.00D-01 BMatC= 1.99D-07 BMatP= 5.50D-06
 IDIUse=1 WtCom= 1.00D+00 WtEn= 0.00D+00
 Coeff-Com:  0.281D-03-0.566D-03-0.493D-02-0.504D-01 0.707D-01 0.985D+00
 Coeff:      0.281D-03-0.566D-03-0.493D-02-0.504D-01 0.707D-01 0.985D+00
 Gap=     0.482 Goal=   None    Shift=    0.000
 RMSDP=3.85D-06 MaxDP=1.10D-04 DE=-1.37D-05 OVMax= 2.84D-04

 Initial convergence to 1.0D-05 achieved.  Increase integral accuracy.
 Cycle   7  Pass 1  IDiag  1:
 E= -445.113597605702     Delta-E=       -0.000002159701 Rises=F Damp=F
 DIIS: error= 3.11D-05 at cycle   1 NSaved=   1.
 NSaved= 1 IEnMin= 1 EnMin= -445.113597605702     IErMin= 1 ErrMin= 3.11D-05
 ErrMax= 3.11D-05  0.00D+00 EMaxC= 1.00D-01 BMatC= 7.17D-08 BMatP= 7.17D-08
 IDIUse=1 WtCom= 1.00D+00 WtEn= 0.00D+00
 Coeff-Com:  0.100D+01
 Coeff:      0.100D+01
 Gap=     0.482 Goal=   None    Shift=    0.000
 RMSDP=3.85D-06 MaxDP=1.10D-04 DE=-2.16D-06 OVMax= 6.04D-05

 Cycle   8  Pass 1  IDiag  1:
 RMSU=  3.69D-06    CP:  1.00D+00
 E= -445.113597642932     Delta-E=       -0.000000037230 Rises=F Damp=F
 DIIS: error= 4.18D-06 at cycle   2 NSaved=   2.
 NSaved= 2 IEnMin= 2 EnMin= -445.113597642932     IErMin= 2 ErrMin= 4.18D-06
 ErrMax= 4.18D-06  0.00D+00 EMaxC= 1.00D-01 BMatC= 2.00D-09 BMatP= 7.17D-08
 IDIUse=1 WtCom= 1.00D+00 WtEn= 0.00D+00
 Coeff-Com: -0.111D-01 0.101D+01
 Coeff:     -0.111D-01 0.101D+01
 Gap=     0.482 Goal=   None    Shift=    0.000
 RMSDP=3.95D-07 MaxDP=9.95D-06 DE=-3.72D-08 OVMax= 1.98D-05

 Cycle   9  Pass 1  IDiag  1:
 RMSU=  3.15D-07    CP:  1.00D+00  1.06D+00
 E= -445.113597647219     Delta-E=       -0.000000004286 Rises=F Damp=F
 DIIS: error= 1.85D-06 at cycle   3 NSaved=   3.
 NSaved= 3 IEnMin= 3 EnMin= -445.113597647219     IErMin= 3 ErrMin= 1.85D-06
 ErrMax= 1.85D-06  0.00D+00 EMaxC= 1.00D-01 BMatC= 3.87D-10 BMatP= 2.00D-09
 IDIUse=1 WtCom= 1.00D+00 WtEn= 0.00D+00
 Coeff-Com: -0.252D-01 0.103D+00 0.923D+00
 Coeff:     -0.252D-01 0.103D+00 0.923D+00
 Gap=     0.482 Goal=   None    Shift=    0.000
 RMSDP=1.27D-07 MaxDP=3.10D-06 DE=-4.29D-09 OVMax= 1.14D-05

 Cycle  10  Pass 1  IDiag  1:
 RMSU=  6.53D-08    CP:  1.00D+00  1.08D+00  1.31D+00
 E= -445.113597648001     Delta-E=       -0.000000000783 Rises=F Damp=F
 DIIS: error= 7.62D-07 at cycle   4 NSaved=   4.
 NSaved= 4 IEnMin= 4 EnMin= -445.113597648001     IErMin= 4 ErrMin= 7.62D-07
 ErrMax= 7.62D-07  0.00D+00 EMaxC= 1.00D-01 BMatC= 5.86D-11 BMatP= 3.87D-10
 IDIUse=1 WtCom= 1.00D+00 WtEn= 0.00D+00
 Coeff-Com:  0.406D-02-0.206D+00-0.562D-01 0.126D+01
 Coeff:      0.406D-02-0.206D+00-0.562D-01 0.126D+01
 Gap=     0.482 Goal=   None    Shift=    0.000
 RMSDP=8.95D-08 MaxDP=2.08D-06 DE=-7.83D-10 OVMax= 6.89D-06

 Cycle  11  Pass 1  IDiag  1:
 RMSU=  2.20D-08    CP:  1.00D+00  1.08D+00  1.56D+00  1.38D+00
 E= -445.113597648157     Delta-E=       -0.000000000156 Rises=F Damp=F
 DIIS: error= 4.39D-08 at cycle   5 NSaved=   5.
 NSaved= 5 IEnMin= 5 EnMin= -445.113597648157     IErMin= 5 ErrMin= 4.39D-08
 ErrMax= 4.39D-08  0.00D+00 EMaxC= 1.00D-01 BMatC= 3.82D-13 BMatP= 5.86D-11
 IDIUse=1 WtCom= 1.00D+00 WtEn= 0.00D+00
 Coeff-Com: -0.212D-03 0.245D-01 0.163D-03-0.167D+00 0.114D+01
 Coeff:     -0.212D-03 0.245D-01 0.163D-03-0.167D+00 0.114D+01
 Gap=     0.482 Goal=   None    Shift=    0.000
 RMSDP=6.54D-09 MaxDP=1.33D-07 DE=-1.56D-10 OVMax= 4.59D-07

 SCF Done:  E(RHF) =  -445.113597648     A.U. after   11 cycles
            NFock= 11  Conv=0.65D-08     -V/T= 2.0004
 KE= 4.449438617461D+02 PE=-1.490282793147D+03 EE= 3.814367026017D+02
 Leave Link  502 at Fri Nov 20 17:36:07 2020, MaxMem=  7340032000 cpu:             331.0 elap:              20.9
 (Enter /share/apps/Gaussian/g16_b01/g16/l801.exe)
 Windowed orbitals will be sorted by symmetry type.
 ExpMin= 7.89D-02 ExpMax= 2.55D+05 ExpMxC= 2.46D+03 IAcc=3 IRadAn=         5 AccDes= 0.00D+00
 HarFok:  IExCor=  205 AccDes= 0.00D+00 IRadAn=         5 IDoV=-2 UseB2=F ITyADJ=14
 ICtDFT= 12500011 ScaDFX=  1.000000  1.000000  1.000000  1.000000
 DSYEVD-2 returned Info=          69 IAlg= 4 N=    34 NDim=    34 NE2=   215877316 trying  DSYEV.
 Largest valence mixing into a core orbital is  3.15D-04
 Largest core mixing into a valence orbital is  4.57D-05
 Range of M.O.s used for correlation:    10   266
 NBasis=   266 NAE=    23 NBE=    23 NFC=     9 NFV=     0
 NROrb=    257 NOA=    14 NOB=    14 NVA=   243 NVB=   243

 **** Warning!!: The largest alpha MO coefficient is  0.12313133D+02

 Leave Link  801 at Fri Nov 20 17:36:09 2020, MaxMem=  7340032000 cpu:               2.7 elap:               0.2
 (Enter /share/apps/Gaussian/g16_b01/g16/l804.exe)
 Closed-shell transformation, MDV=  7340032000 ITran=4 ISComp=2.
 Unit  1 TFree=       4042059 TCopy=       1245553.
 Semi-Direct transformation.
 ModeAB=           4 MOrb=            14 LenV=    7338193526
 LASXX=     57299188 LTotXX=    57299188 LenRXX=   115268342
 LTotAB=    57969154 MaxLAS=    85150268 LenRXY=           0
 NonZer=   172567530 LenScr=   259129344 LnRSAI=    85150268
 LnScr1=   127926272 LExtra=           0 Total=    587474226
 MaxDsk=          -1 SrtSym=           T ITran=            4
 DoSDTr:  NPSUse= 16
 JobTyp=0 Pass  1:  I=   1 to  14.
 (rs|ai) integrals will be sorted in core.
 Complete sort for first half transformation.
 First half transformation complete.
 Begin second half transformation for I=  10.
 Complete sort for second half transformation.
 Second half transformation complete.
 Spin components of T(2) and E(2):
     alpha-alpha T2 =       0.3242309516D-01 E2=     -0.8755112134D-01
     alpha-beta  T2 =       0.2063089817D+00 E2=     -0.6101669325D+00
     beta-beta   T2 =       0.3242309516D-01 E2=     -0.8755112134D-01
 ANorm=    0.1127455175D+01
 E2 =    -0.7852691752D+00 EUMP2 =    -0.44589886682334D+03
 Leave Link  804 at Fri Nov 20 17:37:06 2020, MaxMem=  7340032000 cpu:             891.7 elap:              56.3
 (Enter /share/apps/Gaussian/g16_b01/g16/l913.exe)
 CIDS:  MDV=  7340032000.
 Frozen-core window:  NFC=   9 NFV=   0.
 IFCWin=0 IBDFC=1 NFBD=     0     0 NFCmp=     0     0 NFFFC=     0     0
 Using DD3R+UMP44R for 1st iteration.
 Using DD4RQ for 2nd and later iterations.
 Keep R2 and R3 ints in memory in symmetry-blocked form, NReq=946048433.
 FoFCou: FMM=F IPFlag=           0 FMFlag=           0 FMFlg1=           0
         NFxFlg=           0 DoJE=F BraDBF=F KetDBF=F FulRan=T
         wScrn=  0.000000 ICntrl=       600 IOpCl=  0 I1Cent=           0 NGrid=           0
         NMat0=    1 NMatS0=  35511 NMatT0=    0 NMatD0=    1 NMtDS0=    0 NMtDT0=    0
 Petite list used in FoFCou.
 CIDS: In Core Option IDoMem=           1.
 Coupled Cluster theory with single and double substitutions
 ===========================================================
 Iterations=  50 Convergence= 0.100D-07
 Produce multiple copies of IABC intergrals
 Iteration Nr.   1
 **********************
 DD1Dir will call FoFMem   1 times, MxPair=       210
 NAB=   105 NAA=     0 NBB=     0.
 MP4(R+Q)=  0.21493968D-01
 Maximum subspace dimension=  5
 A-vector RMS=  1.5982049D-03 Max=  1.0706445D-02 conv= 1.00D-06.
 RLE energy=       -0.8105540319
 E3=       -0.46149460D-01        EUMP3=      -0.44594501628D+03
 E4(DQ)=    0.23232400D-02        UMP4(DQ)=   -0.44594269304D+03
 E4(SDQ)=  -0.34692490D-02        UMP4(SDQ)=  -0.44594848553D+03
 VARIATIONAL ENERGIES WITH THE FIRST-ORDER WAVEFUNCTION:
 DE(Corr)= -0.80976532     E(Corr)=     -445.92336296    
 NORM(A)=   0.11394160D+01
 Iteration Nr.   2
 **********************
 DD1Dir will call FoFMem   1 times, MxPair=       210
 NAB=   105 NAA=     0 NBB=     0.
 A-vector RMS=  2.5299064D-04 Max=  9.5590734D-03 conv= 1.00D-06.
 RLE energy=       -0.8334343802
 DE(Corr)= -0.83028789     E(CORR)=     -445.94388554     Delta=-2.05D-02
 NORM(A)=   0.11503369D+01
 Iteration Nr.   3
 **********************
 DD1Dir will call FoFMem   1 times, MxPair=       210
 NAB=   105 NAA=     0 NBB=     0.
 A-vector RMS=  2.0430288D-04 Max=  2.5279529D-03 conv= 1.00D-06.
 RLE energy=       -0.8342338567
 DE(Corr)= -0.83284049     E(CORR)=     -445.94643814     Delta=-2.55D-03
 NORM(A)=   0.11524082D+01
 Iteration Nr.   4
 **********************
 DD1Dir will call FoFMem   1 times, MxPair=       210
 NAB=   105 NAA=     0 NBB=     0.
 A-vector RMS=  4.9233460D-05 Max=  1.3415630D-03 conv= 1.00D-06.
 RLE energy=       -0.8345157533
 DE(Corr)= -0.83439534     E(CORR)=     -445.94799299     Delta=-1.55D-03
 NORM(A)=   0.11530036D+01
 Iteration Nr.   5
 **********************
 DD1Dir will call FoFMem   1 times, MxPair=       210
 NAB=   105 NAA=     0 NBB=     0.
 A-vector RMS=  2.3215870D-05 Max=  3.5137966D-04 conv= 1.00D-06.
 RLE energy=       -0.8345866434
 DE(Corr)= -0.83454470     E(CORR)=     -445.94814235     Delta=-1.49D-04
 NORM(A)=   0.11531507D+01
 Iteration Nr.   6
 **********************
 DD1Dir will call FoFMem   1 times, MxPair=       210
 NAB=   105 NAA=     0 NBB=     0.
 A-vector RMS=  5.5229144D-06 Max=  7.0597781D-05 conv= 1.00D-06.
 RLE energy=       -0.8345522228
 DE(Corr)= -0.83456357     E(CORR)=     -445.94816122     Delta=-1.89D-05
 NORM(A)=   0.11531531D+01
 Iteration Nr.   7
 **********************
 DD1Dir will call FoFMem   1 times, MxPair=       210
 NAB=   105 NAA=     0 NBB=     0.
 A-vector RMS=  1.8933593D-06 Max=  3.2510345D-05 conv= 1.00D-06.
 RLE energy=       -0.8345607243
 DE(Corr)= -0.83456345     E(CORR)=     -445.94816110     Delta= 1.19D-07
 NORM(A)=   0.11531577D+01
 Iteration Nr.   8
 **********************
 DD1Dir will call FoFMem   1 times, MxPair=       210
 NAB=   105 NAA=     0 NBB=     0.
 A-vector RMS=  6.5668402D-07 Max=  1.0520486D-05 conv= 1.00D-06.
 RLE energy=       -0.8345614778
 DE(Corr)= -0.83456188     E(CORR)=     -445.94815953     Delta= 1.57D-06
 NORM(A)=   0.11531588D+01
 Iteration Nr.   9
 **********************
 DD1Dir will call FoFMem   1 times, MxPair=       210
 NAB=   105 NAA=     0 NBB=     0.
 A-vector RMS=  2.4458706D-07 Max=  3.9385086D-06 conv= 1.00D-06.
 RLE energy=       -0.8345626393
 DE(Corr)= -0.83456265     E(CORR)=     -445.94816030     Delta=-7.66D-07
 NORM(A)=   0.11531595D+01
 Iteration Nr.  10
 **********************
 DD1Dir will call FoFMem   1 times, MxPair=       210
 NAB=   105 NAA=     0 NBB=     0.
 A-vector RMS=  9.9172639D-08 Max=  1.8320881D-06 conv= 1.00D-06.
 RLE energy=       -0.8345629422
 DE(Corr)= -0.83456282     E(CORR)=     -445.94816046     Delta=-1.67D-07
 NORM(A)=   0.11531599D+01
 Iteration Nr.  11
 **********************
 DD1Dir will call FoFMem   1 times, MxPair=       210
 NAB=   105 NAA=     0 NBB=     0.
 A-vector RMS=  3.5994943D-08 Max=  5.4014062D-07 conv= 1.00D-06.
 RLE energy=       -0.8345630403
 DE(Corr)= -0.83456300     E(CORR)=     -445.94816065     Delta=-1.82D-07
 NORM(A)=   0.11531601D+01
 Iteration Nr.  12
 **********************
 DD1Dir will call FoFMem   1 times, MxPair=       210
 NAB=   105 NAA=     0 NBB=     0.
 A-vector RMS=  1.4818650D-08 Max=  2.6348795D-07 conv= 1.00D-06.
 RLE energy=       -0.8345630812
 DE(Corr)= -0.83456306     E(CORR)=     -445.94816071     Delta=-5.93D-08
 NORM(A)=   0.11531602D+01
 Iteration Nr.  13
 **********************
 DD1Dir will call FoFMem   1 times, MxPair=       210
 NAB=   105 NAA=     0 NBB=     0.
 A-vector RMS=  5.0797709D-09 Max=  8.2320752D-08 conv= 1.00D-06.
 RLE energy=       -0.8345630898
 DE(Corr)= -0.83456308     E(CORR)=     -445.94816073     Delta=-2.61D-08
 NORM(A)=   0.11531602D+01
 Iteration Nr.  14
 **********************
 DD1Dir will call FoFMem   1 times, MxPair=       210
 NAB=   105 NAA=     0 NBB=     0.
 A-vector RMS=  1.9971893D-09 Max=  3.4477103D-08 conv= 1.00D-06.
 RLE energy=       -0.8345630921
 DE(Corr)= -0.83456309     E(CORR)=     -445.94816074     Delta=-6.88D-09
 NORM(A)=   0.11531602D+01
 CI/CC converged in   14 iterations to DelEn=-6.88D-09 Conv= 1.00D-08 ErrA1= 2.00D-09 Conv= 1.00D-06
 Wavefunction amplitudes converged. E(Corr)=     -445.94816074    
 Largest amplitude= 9.20D-02

 Z-amplitude iterations

 Iteration Nr.   1
 **********************
 DD1Dir will call FoFMem   1 times, MxPair=       210
 NAB=   105 NAA=     0 NBB=     0.
 A-vector RMS=  3.7866104D-04 Max=  4.2518897D-03 conv= 1.00D-06.
 RLE energy=       -0.8344824275
 DE(Z)= -0.80694652     E(Z)=     -445.92054417     Delta= 2.76D-02
 NORM(A)=   0.11531292D+01
 Iteration Nr.   2
 **********************
 DD1Dir will call FoFMem   1 times, MxPair=       210
 NAB=   105 NAA=     0 NBB=     0.
 A-vector RMS=  3.7766717D-04 Max=  4.2415113D-03 conv= 1.00D-06.
 RLE energy=       -0.8342607055
 DE(Z)= -0.80694088     E(Z)=     -445.92053853     Delta= 5.64D-06
 NORM(A)=   0.11530424D+01
 Iteration Nr.   3
 **********************
 DD1Dir will call FoFMem   1 times, MxPair=       210
 NAB=   105 NAA=     0 NBB=     0.
 A-vector RMS=  3.7509901D-04 Max=  4.2099951D-03 conv= 1.00D-06.
 RLE energy=       -0.8337883931
 DE(Z)= -0.80692710     E(Z)=     -445.92052475     Delta= 1.38D-05
 NORM(A)=   0.11528544D+01
 Iteration Nr.   4
 **********************
 DD1Dir will call FoFMem   1 times, MxPair=       210
 NAB=   105 NAA=     0 NBB=     0.
 A-vector RMS=  3.6876491D-04 Max=  4.1420562D-03 conv= 1.00D-06.
 RLE energy=       -0.8338501573
 DE(Z)= -0.80689486     E(Z)=     -445.92049251     Delta= 3.22D-05
 NORM(A)=   0.11528778D+01
 Iteration Nr.   5
 **********************
 DD1Dir will call FoFMem   1 times, MxPair=       210
 NAB=   105 NAA=     0 NBB=     0.
 A-vector RMS=  3.6955257D-04 Max=  4.1495425D-03 conv= 1.00D-06.
 RLE energy=       -0.8049792818
 DE(Z)= -0.80689912     E(Z)=     -445.92049677     Delta=-4.26D-06
 NORM(A)=   0.11417945D+01
 Iteration Nr.   6
 **********************
 DD1Dir will call FoFMem   1 times, MxPair=       210
 NAB=   105 NAA=     0 NBB=     0.
 A-vector RMS=  6.7629101D-07 Max=  1.0689516D-05 conv= 1.00D-06.
 RLE energy=       -0.8049797303
 DE(Z)= -0.80498032     E(Z)=     -445.91857797     Delta= 1.92D-03
 NORM(A)=   0.11417923D+01
 Iteration Nr.   7
 **********************
 DD1Dir will call FoFMem   1 times, MxPair=       210
 NAB=   105 NAA=     0 NBB=     0.
 A-vector RMS=  2.9819173D-07 Max=  4.6888583D-06 conv= 1.00D-06.
 RLE energy=       -0.8049795336
 DE(Z)= -0.80497974     E(Z)=     -445.91857739     Delta= 5.81D-07
 NORM(A)=   0.11417919D+01
 Iteration Nr.   8
 **********************
 DD1Dir will call FoFMem   1 times, MxPair=       210
 NAB=   105 NAA=     0 NBB=     0.
 A-vector RMS=  8.6769176D-08 Max=  1.2467360D-06 conv= 1.00D-06.
 RLE energy=       -0.8049795462
 DE(Z)= -0.80497966     E(Z)=     -445.91857731     Delta= 8.09D-08
 NORM(A)=   0.11417916D+01
 Iteration Nr.   9
 **********************
 DD1Dir will call FoFMem   1 times, MxPair=       210
 NAB=   105 NAA=     0 NBB=     0.
 A-vector RMS=  2.8378202D-08 Max=  3.8196927D-07 conv= 1.00D-06.
 RLE energy=       -0.8049796071
 DE(Z)= -0.80497960     E(Z)=     -445.91857725     Delta= 5.38D-08
 NORM(A)=   0.11417917D+01
 Iteration Nr.  10
 **********************
 DD1Dir will call FoFMem   1 times, MxPair=       210
 NAB=   105 NAA=     0 NBB=     0.
 A-vector RMS=  7.3287693D-09 Max=  8.4443493D-08 conv= 1.00D-06.
 RLE energy=       -0.8049795922
 DE(Z)= -0.80497959     E(Z)=     -445.91857724     Delta= 1.16D-08
 NORM(A)=   0.11417917D+01
 Iteration Nr.  11
 **********************
 DD1Dir will call FoFMem   1 times, MxPair=       210
 NAB=   105 NAA=     0 NBB=     0.
 A-vector RMS=  2.9697705D-09 Max=  4.0074369D-08 conv= 1.00D-06.
 RLE energy=       -0.8049795949
 DE(Z)= -0.80497960     E(Z)=     -445.91857724     Delta=-3.55D-09
 NORM(A)=   0.11417917D+01
 CI/CC converged in   11 iterations to DelEn=-3.55D-09 Conv= 1.00D-08 ErrA1= 2.97D-09 Conv= 1.00D-06
 Z-amplitudes converged.
 Discarding MO integrals.
 Leave Link  913 at Fri Nov 20 18:07:14 2020, MaxMem=  7340032000 cpu:           27736.8 elap:            1789.2
 (Enter /share/apps/Gaussian/g16_b01/g16/l1111.exe)
 Unit  1 TFree=     122396483 TCopy=      21384360.
 Selected functions:
 Compute CCSD 2PDM.
 Form Post-SCF non-separable gradient here.
 IO1PDM=    0 IOW=    0 IO2PDM=    0.
 MDV=    7340032000.
 Frozen-core window:  NFC=   9 NFV=   0.
 Leave Link 1111 at Sat Nov 21 03:09:48 2020, MaxMem=  7340032000 cpu:          503108.9 elap:           32552.8
 (Enter /share/apps/Gaussian/g16_b01/g16/l1002.exe)
 Minotr:  Closed shell wavefunction.
          Computing CCSD/QCISD derivatives.
          Using Z-Vector for PSCF gradient.
          Skipping F1 and S1 gradient terms here.
          IDoAtm=1111111111111
          Frozen-core window.
          Direct CPHF calculation.
          Differentiating once with respect to electric field.
                with respect to dipole field.
          Differentiating once with respect to nuclear coordinates.
          Using symmetry in CPHF.
          Requested convergence is 1.0D-10 RMS, and 1.0D-09 maximum.
          NewPWx=F KeepS1=T KeepF1=T KeepIn=T MapXYZ=F SortEE=F KeepMc=T.
 Keep R1 ints in memory in symmetry-blocked form, NReq=945930887.
 FoFCou: FMM=F IPFlag=           0 FMFlag=           0 FMFlg1=           0
         NFxFlg=           0 DoJE=F BraDBF=F KetDBF=F FulRan=T
         wScrn=  0.000000 ICntrl=       600 IOpCl=  0 I1Cent=           0 NGrid=           0
         NMat0=    1 NMatS0=  35511 NMatT0=    0 NMatD0=    1 NMtDS0=    0 NMtDT0=    0
 Petite list used in FoFCou.
          MDV=    7340032000 using IRadAn=       5.
          Solving linear equations separately, MaxMat=       0.
          There are     1 degrees of freedom in the 1st order CPHF.  IDoFFX=0 NUNeed=     1.
 LinEq1:  Iter=  0 NonCon=     1 RMS=1.85D-03 Max=3.82D-02 NDo=     1
 AX will form     1 AO Fock derivatives at one time.
 LinEq1:  Iter=  1 NonCon=     1 RMS=6.49D-04 Max=1.54D-02 NDo=     1
 LinEq1:  Iter=  2 NonCon=     1 RMS=1.55D-04 Max=2.41D-03 NDo=     1
 LinEq1:  Iter=  3 NonCon=     1 RMS=3.31D-05 Max=5.44D-04 NDo=     1
 LinEq1:  Iter=  4 NonCon=     1 RMS=6.99D-06 Max=1.24D-04 NDo=     1
 LinEq1:  Iter=  5 NonCon=     1 RMS=1.61D-06 Max=2.96D-05 NDo=     1
 LinEq1:  Iter=  6 NonCon=     1 RMS=2.99D-07 Max=4.89D-06 NDo=     1
 LinEq1:  Iter=  7 NonCon=     1 RMS=6.25D-08 Max=8.74D-07 NDo=     1
 LinEq1:  Iter=  8 NonCon=     1 RMS=1.73D-08 Max=3.07D-07 NDo=     1
 LinEq1:  Iter=  9 NonCon=     1 RMS=4.07D-09 Max=5.41D-08 NDo=     1
 LinEq1:  Iter= 10 NonCon=     1 RMS=6.69D-10 Max=1.08D-08 NDo=     1
 LinEq1:  Iter= 11 NonCon=     1 RMS=1.19D-10 Max=2.54D-09 NDo=     1
 LinEq1:  Iter= 12 NonCon=     0 RMS=3.39D-11 Max=5.53D-10 NDo=     1
 Linear equations converged to 1.000D-10 1.000D-09 after    12 iterations.
 End of Minotr F.D. properties file   721 does not exist.
 End of Minotr F.D. properties file   722 does not exist.
 End of Minotr F.D. properties file   788 does not exist.
 Leave Link 1002 at Sat Nov 21 03:10:33 2020, MaxMem=  7340032000 cpu:             260.7 elap:              43.9
 (Enter /share/apps/Gaussian/g16_b01/g16/l601.exe)
 Copying SCF densities to generalized density rwf, IOpCl= 0 IROHF=0.

 **********************************************************************

            Population analysis using the SCF Density.

 **********************************************************************

 Orbital symmetries:
       Occupied  (A') (A') (A") (A") (A') (A') (A') (A') (A") (A')
                 (A") (A') (A") (A') (A') (A') (A") (A') (A") (A')
                 (A') (A") (A')
       Virtual   (A') (A") (A") (A') (A') (A") (A') (A') (A") (A')
                 (A") (A') (A') (A") (A") (A') (A") (A') (A') (A")
                 (A') (A') (A') (A') (A") (A') (A') (A') (A") (A')
                 (A") (A") (A") (A') (A") (A') (A') (A") (A") (A')
                 (A') (A") (A') (A") (A') (A") (A') (A") (A') (A")
                 (A") (A') (A') (A") (A') (A") (A') (A") (A') (A')
                 (A") (A') (A") (A') (A') (A") (A') (A') (A") (A')
                 (A") (A') (A") (A") (A') (A') (A") (A") (A') (A')
                 (A") (A') (A') (A") (A') (A") (A") (A') (A") (A')
                 (A") (A') (A") (A') (A") (A') (A") (A") (A') (A')
                 (A") (A') (A") (A') (A') (A') (A") (A") (A') (A')
                 (A") (A") (A') (A') (A') (A') (A") (A') (A") (A')
                 (A') (A") (A') (A") (A') (A") (A') (A') (A") (A')
                 (A") (A') (A") (A') (A') (A") (A') (A") (A') (A")
                 (A') (A") (A') (A") (A") (A') (A") (A') (A") (A')
                 (A") (A') (A') (A') (A") (A') (A") (A") (A') (A")
                 (A') (A") (A") (A") (A') (A") (A') (A") (A') (A')
                 (A') (A") (A") (A') (A") (A') (A") (A') (A") (A")
                 (A') (A') (A') (A') (A") (A') (A") (A') (A") (A")
                 (A') (A') (A") (A") (A") (A') (A') (A') (A") (A")
                 (A') (A") (A') (A") (A') (A') (A') (A") (A") (A')
                 (A") (A') (A") (A') (A") (A') (A") (A') (A') (A")
                 (A') (A") (A') (A") (A') (A") (A') (A') (A") (A')
                 (A") (A") (A') (A") (A') (A") (A') (A") (A") (A')
                 (A') (A") (A")
 The electronic state is 1-A'.
 Alpha  occ. eigenvalues --  -68.76137 -11.22937 -11.22772 -11.20958 -11.20957
 Alpha  occ. eigenvalues --   -6.11046  -4.21660  -4.21642  -4.21609  -1.09080
 Alpha  occ. eigenvalues --   -0.95931  -0.88998  -0.71371  -0.69221  -0.64012
 Alpha  occ. eigenvalues --   -0.59028  -0.55527  -0.53313  -0.50138  -0.46429
 Alpha  occ. eigenvalues --   -0.44299  -0.41630  -0.34582
 Alpha virt. eigenvalues --    0.13584   0.14080   0.16782   0.16972   0.18358
 Alpha virt. eigenvalues --    0.18875   0.20112   0.21563   0.22010   0.22240
 Alpha virt. eigenvalues --    0.23248   0.31360   0.32057   0.34447   0.35905
 Alpha virt. eigenvalues --    0.36832   0.40084   0.40471   0.43588   0.45026
 Alpha virt. eigenvalues --    0.45469   0.46796   0.48465   0.50437   0.51350
 Alpha virt. eigenvalues --    0.53798   0.57064   0.58643   0.59030   0.61256
 Alpha virt. eigenvalues --    0.61844   0.62939   0.63887   0.63932   0.65479
 Alpha virt. eigenvalues --    0.65512   0.66095   0.66242   0.74143   0.76037
 Alpha virt. eigenvalues --    0.78827   0.78960   0.79802   0.83098   0.83297
 Alpha virt. eigenvalues --    0.85207   0.92389   0.94327   0.95792   0.96790
 Alpha virt. eigenvalues --    1.00063   1.01990   1.03815   1.08379   1.09873
 Alpha virt. eigenvalues --    1.12547   1.12642   1.16244   1.16895   1.20400
 Alpha virt. eigenvalues --    1.21023   1.23466   1.26168   1.26707   1.27876
 Alpha virt. eigenvalues --    1.29789   1.32146   1.32523   1.34337   1.38878
 Alpha virt. eigenvalues --    1.39413   1.40466   1.41708   1.44903   1.44954
 Alpha virt. eigenvalues --    1.45374   1.46065   1.47260   1.52607   1.54694
 Alpha virt. eigenvalues --    1.56333   1.57602   1.58052   1.59735   1.59794
 Alpha virt. eigenvalues --    1.60816   1.63114   1.68830   1.69704   1.71117
 Alpha virt. eigenvalues --    1.71214   1.72034   1.77611   1.79421   1.79613
 Alpha virt. eigenvalues --    1.82150   1.85013   1.85204   1.86297   1.93325
 Alpha virt. eigenvalues --    1.94897   2.01735   2.25130   2.46451   2.47768
 Alpha virt. eigenvalues --    2.57294   2.60355   2.63752   2.64756   2.68534
 Alpha virt. eigenvalues --    2.71585   2.73336   2.75214   2.76293   2.83316
 Alpha virt. eigenvalues --    2.84136   2.88676   2.92079   2.97660   2.98011
 Alpha virt. eigenvalues --    2.98630   3.00758   3.03223   3.07537   3.09134
 Alpha virt. eigenvalues --    3.12261   3.12648   3.15862   3.20099   3.21737
 Alpha virt. eigenvalues --    3.22229   3.23510   3.26948   3.31522   3.33067
 Alpha virt. eigenvalues --    3.33396   3.35057   3.37673   3.38608   3.42423
 Alpha virt. eigenvalues --    3.42779   3.44360   3.44975   3.47319   3.51328
 Alpha virt. eigenvalues --    3.51615   3.55271   3.56313   3.56611   3.58747
 Alpha virt. eigenvalues --    3.61173   3.62446   3.63248   3.64163   3.65543
 Alpha virt. eigenvalues --    3.69683   3.71739   3.75499   3.75702   3.76914
 Alpha virt. eigenvalues --    3.80956   3.82030   3.83095   3.85125   3.85185
 Alpha virt. eigenvalues --    3.87998   3.88836   3.93743   3.94235   3.95322
 Alpha virt. eigenvalues --    3.96743   3.96854   4.00316   4.06944   4.08151
 Alpha virt. eigenvalues --    4.11123   4.12037   4.14731   4.15452   4.19036
 Alpha virt. eigenvalues --    4.19375   4.20241   4.22389   4.24256   4.25773
 Alpha virt. eigenvalues --    4.29810   4.29901   4.32140   4.33670   4.39060
 Alpha virt. eigenvalues --    4.40949   4.44443   4.44877   4.46403   4.47784
 Alpha virt. eigenvalues --    4.47795   4.48043   4.50555   4.51319   4.52836
 Alpha virt. eigenvalues --    4.55617   4.58603   4.60540   4.64092   4.67018
 Alpha virt. eigenvalues --    4.70858   4.76998   4.76999   4.84246   4.85338
 Alpha virt. eigenvalues --    4.93219   5.00685   5.00924   5.07436   5.11353
 Alpha virt. eigenvalues --    5.12731   5.17857   5.20812   5.21840   5.30552
 Alpha virt. eigenvalues --    5.33232   5.35987   5.40779   5.41571   5.46412
 Alpha virt. eigenvalues --    5.47948   5.52170   5.56987   5.60676   5.61886
 Alpha virt. eigenvalues --    5.73580   5.77934   5.91341   6.02439   6.07038
 Alpha virt. eigenvalues --    6.22027   6.33169   6.37401   6.43608  10.78225
 Alpha virt. eigenvalues --   12.54038  12.97983  14.28825
     Molecular Orbital Coefficients:
                           1         2         3         4         5
                           O         O         O         O         O
     Eigenvalues --   -68.76137 -11.22937 -11.22772 -11.20958 -11.20957
   1 1   C  1S         -0.00000   0.69174   0.69217   0.01291  -0.01116
   2        2S         -0.00002  -0.00542  -0.00453  -0.00026   0.00042
   3        3S          0.00000   0.02940   0.02923   0.00039  -0.00030
   4        4S          0.00009   0.00272   0.00561   0.00111  -0.00121
   5        5PX         0.00000   0.00001   0.00000   0.00000   0.00001
   6        5PY         0.00000  -0.00006  -0.00007   0.00015  -0.00018
   7        5PZ        -0.00000   0.00015   0.00065  -0.00012   0.00008
   8        6PX         0.00000  -0.00003   0.00001  -0.00000  -0.00004
   9        6PY        -0.00002   0.00016  -0.00026   0.00019   0.00021
  10        6PZ         0.00001  -0.00045  -0.00387   0.00014   0.00012
  11        7PX         0.00000  -0.00004   0.00003  -0.00006  -0.00003
  12        7PY        -0.00006  -0.00020  -0.00118  -0.00084   0.00090
  13        7PZ         0.00000   0.00033  -0.00214   0.00086  -0.00006
  14        8D 0       -0.00000   0.00018   0.00056   0.00004   0.00000
  15        8D+1       -0.00000   0.00000  -0.00000   0.00000   0.00000
  16        8D-1        0.00000   0.00010   0.00010   0.00002  -0.00001
  17        8D+2       -0.00000  -0.00030  -0.00041  -0.00003   0.00002
  18        8D-2       -0.00000  -0.00001  -0.00001  -0.00000  -0.00000
  19        9D 0        0.00002  -0.00023   0.00201  -0.00019   0.00008
  20        9D+1        0.00000  -0.00003   0.00002  -0.00002  -0.00003
  21        9D-1       -0.00003   0.00001  -0.00064  -0.00061   0.00021
  22        9D+2        0.00001  -0.00010   0.00127  -0.00014   0.00007
  23        9D-2        0.00000   0.00001   0.00002   0.00001   0.00001
  24       10F 0       -0.00000  -0.00019  -0.00064  -0.00016   0.00011
  25       10F+1        0.00000  -0.00000  -0.00000   0.00001  -0.00000
  26       10F-1        0.00000   0.00002   0.00003   0.00003   0.00003
  27       10F+2       -0.00000  -0.00024  -0.00025  -0.00021   0.00012
  28       10F-2       -0.00000  -0.00000  -0.00000   0.00000   0.00000
  29       10F+3        0.00000   0.00000  -0.00000  -0.00000   0.00001
  30       10F-3       -0.00000  -0.00004  -0.00002   0.00011  -0.00008
  31 2   C  1S         -0.00000   0.69174  -0.69217  -0.01291  -0.01116
  32        2S         -0.00002  -0.00542   0.00453   0.00026   0.00042
  33        3S          0.00000   0.02940  -0.02923  -0.00039  -0.00030
  34        4S          0.00009   0.00272  -0.00561  -0.00111  -0.00121
  35        5PX         0.00000   0.00001  -0.00000  -0.00000   0.00001
  36        5PY         0.00000  -0.00006   0.00007  -0.00015  -0.00018
  37        5PZ         0.00000  -0.00015   0.00065  -0.00012  -0.00008
  38        6PX         0.00000  -0.00003  -0.00001   0.00000  -0.00004
  39        6PY        -0.00002   0.00016   0.00026  -0.00019   0.00021
  40        6PZ        -0.00001   0.00045  -0.00387   0.00014  -0.00012
  41        7PX         0.00000  -0.00004  -0.00003   0.00006  -0.00003
  42        7PY        -0.00006  -0.00020   0.00118   0.00084   0.00090
  43        7PZ        -0.00000  -0.00033  -0.00214   0.00086   0.00006
  44        8D 0       -0.00000   0.00018  -0.00056  -0.00004   0.00000
  45        8D+1        0.00000  -0.00000  -0.00000   0.00000  -0.00000
  46        8D-1       -0.00000  -0.00010   0.00010   0.00002   0.00001
  47        8D+2       -0.00000  -0.00030   0.00041   0.00003   0.00002
  48        8D-2       -0.00000  -0.00001   0.00001   0.00000  -0.00000
  49        9D 0        0.00002  -0.00023  -0.00201   0.00019   0.00008
  50        9D+1       -0.00000   0.00003   0.00002  -0.00002   0.00003
  51        9D-1        0.00003  -0.00001  -0.00064  -0.00061  -0.00021
  52        9D+2        0.00001  -0.00010  -0.00127   0.00014   0.00007
  53        9D-2        0.00000   0.00001  -0.00002  -0.00001   0.00001
  54       10F 0        0.00000   0.00019  -0.00064  -0.00016  -0.00011
  55       10F+1        0.00000  -0.00000   0.00000  -0.00001  -0.00000
  56       10F-1        0.00000   0.00002  -0.00003  -0.00003   0.00003
  57       10F+2        0.00000   0.00024  -0.00025  -0.00021  -0.00012
  58       10F-2        0.00000   0.00000  -0.00000   0.00000  -0.00000
  59       10F+3        0.00000   0.00000   0.00000   0.00000   0.00001
  60       10F-3       -0.00000  -0.00004   0.00002  -0.00011  -0.00008
  61 3   C  1S         -0.00000   0.01102  -0.01281   0.69191   0.69191
  62        2S         -0.00002  -0.00011  -0.00033  -0.00495  -0.00516
  63        3S          0.00000   0.00058  -0.00060   0.02928   0.02930
  64        4S         -0.00015   0.00064   0.00056   0.00528   0.00538
  65        5PX        -0.00000  -0.00002  -0.00000  -0.00002  -0.00003
  66        5PY         0.00000   0.00014  -0.00013   0.00017   0.00017
  67        5PZ        -0.00000   0.00008  -0.00000  -0.00005  -0.00003
  68        6PX        -0.00001   0.00016   0.00008  -0.00025  -0.00004
  69        6PY        -0.00000   0.00017  -0.00053   0.00028   0.00018
  70        6PZ        -0.00001  -0.00010  -0.00092  -0.00080  -0.00098
  71        7PX        -0.00001   0.00042   0.00015  -0.00034   0.00022
  72        7PY        -0.00004  -0.00067   0.00000   0.00072   0.00023
  73        7PZ        -0.00002   0.00010   0.00007   0.00004   0.00034
  74        8D 0       -0.00000  -0.00002  -0.00000   0.00003   0.00004
  75        8D+1       -0.00000  -0.00001  -0.00001  -0.00002  -0.00004
  76        8D-1        0.00000   0.00002  -0.00002   0.00011   0.00010
  77        8D+2        0.00000   0.00003   0.00004   0.00018   0.00019
  78        8D-2        0.00000   0.00001  -0.00000   0.00004   0.00004
  79        9D 0        0.00004  -0.00003  -0.00014  -0.00023  -0.00019
  80        9D+1        0.00001  -0.00014  -0.00006  -0.00005  -0.00012
  81        9D-1       -0.00001  -0.00041  -0.00018   0.00027   0.00018
  82        9D+2       -0.00001  -0.00008  -0.00009   0.00033   0.00037
  83        9D-2       -0.00000  -0.00001  -0.00000   0.00009   0.00008
  84       10F 0       -0.00000   0.00011  -0.00013   0.00011   0.00009
  85       10F+1        0.00000   0.00001  -0.00000   0.00014   0.00014
  86       10F-1       -0.00001  -0.00005  -0.00005   0.00001   0.00001
  87       10F+2       -0.00000   0.00011  -0.00016  -0.00043  -0.00044
  88       10F-2       -0.00000  -0.00002   0.00001  -0.00003  -0.00004
  89       10F+3       -0.00000  -0.00000   0.00001  -0.00005  -0.00004
  90       10F-3        0.00001   0.00012  -0.00013  -0.00015  -0.00013
  91 4   C  1S         -0.00000   0.01102   0.01281  -0.69191   0.69191
  92        2S         -0.00002  -0.00011   0.00033   0.00495  -0.00516
  93        3S          0.00000   0.00058   0.00060  -0.02928   0.02930
  94        4S         -0.00015   0.00064  -0.00056  -0.00528   0.00538
  95        5PX        -0.00000  -0.00002   0.00000   0.00002  -0.00003
  96        5PY         0.00000   0.00014   0.00013  -0.00017   0.00017
  97        5PZ         0.00000  -0.00008  -0.00000  -0.00005   0.00003
  98        6PX        -0.00001   0.00016  -0.00008   0.00025  -0.00004
  99        6PY        -0.00000   0.00017   0.00053  -0.00028   0.00018
 100        6PZ         0.00001   0.00010  -0.00092  -0.00080   0.00098
 101        7PX        -0.00001   0.00042  -0.00015   0.00034   0.00022
 102        7PY        -0.00004  -0.00067  -0.00000  -0.00072   0.00023
 103        7PZ         0.00002  -0.00010   0.00007   0.00004  -0.00034
 104        8D 0       -0.00000  -0.00002   0.00000  -0.00003   0.00004
 105        8D+1        0.00000   0.00001  -0.00001  -0.00002   0.00004
 106        8D-1       -0.00000  -0.00002  -0.00002   0.00011  -0.00010
 107        8D+2        0.00000   0.00003  -0.00004  -0.00018   0.00019
 108        8D-2        0.00000   0.00001   0.00000  -0.00004   0.00004
 109        9D 0        0.00004  -0.00003   0.00014   0.00023  -0.00019
 110        9D+1       -0.00001   0.00014  -0.00006  -0.00005   0.00012
 111        9D-1        0.00001   0.00041  -0.00018   0.00027  -0.00018
 112        9D+2       -0.00001  -0.00008   0.00009  -0.00033   0.00037
 113        9D-2       -0.00000  -0.00001   0.00000  -0.00009   0.00008
 114       10F 0        0.00000  -0.00011  -0.00013   0.00011  -0.00009
 115       10F+1        0.00000   0.00001   0.00000  -0.00014   0.00014
 116       10F-1       -0.00001  -0.00005   0.00005  -0.00001   0.00001
 117       10F+2        0.00000  -0.00011  -0.00016  -0.00043   0.00044
 118       10F-2        0.00000   0.00002   0.00001  -0.00003   0.00004
 119       10F+3       -0.00000  -0.00000  -0.00001   0.00005  -0.00004
 120       10F-3        0.00001   0.00012   0.00013   0.00015  -0.00013
 121 5   Si 1S          1.00206  -0.00000   0.00000   0.00000   0.00002
 122        2S         -0.00715   0.00001   0.00000   0.00000   0.00003
 123        3S          0.00076  -0.00008   0.00000   0.00000   0.00053
 124        4S         -0.00123  -0.00003   0.00000   0.00000  -0.00016
 125        5S         -0.00035  -0.00184   0.00000   0.00000  -0.00190
 126        6PX         0.00000   0.00001   0.00000   0.00000   0.00001
 127        6PY        -0.00001  -0.00001   0.00000   0.00000  -0.00003
 128        6PZ         0.00000   0.00000   0.00002   0.00006   0.00000
 129        7PX        -0.00000   0.00012   0.00000   0.00000  -0.00011
 130        7PY         0.00000  -0.00047   0.00000   0.00000   0.00052
 131        7PZ         0.00000   0.00000   0.00016  -0.00053   0.00000
 132        8PX         0.00000  -0.00001   0.00000   0.00000   0.00001
 133        8PY        -0.00000   0.00001   0.00000   0.00000  -0.00001
 134        8PZ         0.00000   0.00000  -0.00006  -0.00004   0.00000
 135        9PX        -0.00000  -0.00037   0.00000   0.00000  -0.00015
 136        9PY         0.00000  -0.00065   0.00000   0.00000  -0.00005
 137        9PZ         0.00000   0.00000   0.00004  -0.00019   0.00000
 138       10D 0       -0.00000  -0.00032   0.00000   0.00000   0.00013
 139       10D+1        0.00000   0.00000  -0.00004   0.00005   0.00000
 140       10D-1        0.00000   0.00000   0.00002  -0.00041   0.00000
 141       10D+2        0.00000  -0.00005   0.00000   0.00000  -0.00041
 142       10D-2        0.00000   0.00006   0.00000   0.00000  -0.00016
 143       11D 0        0.00001  -0.00001   0.00000   0.00000   0.00014
 144       11D+1        0.00000   0.00000  -0.00001   0.00007   0.00000
 145       11D-1        0.00000   0.00000  -0.00001  -0.00032   0.00000
 146       11D+2        0.00000   0.00009   0.00000   0.00000  -0.00013
 147       11D-2        0.00000   0.00004   0.00000   0.00000  -0.00007
 148       12F 0        0.00000   0.00000   0.00012   0.00000   0.00000
 149       12F+1       -0.00000   0.00003   0.00000   0.00000  -0.00004
 150       12F-1        0.00001  -0.00007   0.00000   0.00000   0.00012
 151       12F+2        0.00000   0.00000   0.00001   0.00020   0.00000
 152       12F-2        0.00000   0.00000  -0.00001   0.00008   0.00000
 153       12F+3        0.00001  -0.00000   0.00000   0.00000   0.00002
 154       12F-3       -0.00000  -0.00017   0.00000   0.00000  -0.00006
 155 6   H  1S         -0.00000   0.00004   0.00004  -0.00013   0.00015
 156        2S          0.00003  -0.00043   0.00030   0.00082  -0.00118
 157        3S          0.00003  -0.00014   0.00007   0.00047  -0.00047
 158        4PX         0.00000  -0.00001  -0.00003  -0.00017   0.00018
 159        4PY        -0.00000  -0.00002  -0.00002   0.00000  -0.00000
 160        4PZ         0.00000   0.00001  -0.00002  -0.00017   0.00017
 161        5PX         0.00001   0.00008  -0.00016  -0.00021   0.00027
 162        5PY        -0.00000  -0.00015  -0.00009  -0.00001  -0.00002
 163        5PZ        -0.00002   0.00011  -0.00003  -0.00035   0.00045
 164        6D 0        0.00000   0.00000  -0.00002   0.00008  -0.00008
 165        6D+1        0.00000  -0.00002   0.00002   0.00019  -0.00021
 166        6D-1        0.00000   0.00003   0.00006   0.00000   0.00001
 167        6D+2       -0.00000   0.00002   0.00005   0.00009  -0.00009
 168        6D-2        0.00000   0.00004   0.00003  -0.00000   0.00001
 169 7   H  1S         -0.00000   0.00003   0.00003  -0.00016   0.00013
 170        2S          0.00002   0.00013   0.00003   0.00122  -0.00092
 171        3S          0.00002  -0.00002  -0.00009   0.00072  -0.00033
 172        4PX        -0.00000   0.00002   0.00002   0.00021  -0.00020
 173        4PY        -0.00000  -0.00002  -0.00001   0.00003  -0.00003
 174        4PZ         0.00000  -0.00000  -0.00000  -0.00011   0.00012
 175        5PX        -0.00000   0.00003   0.00011   0.00039  -0.00031
 176        5PY        -0.00000  -0.00007  -0.00009   0.00005  -0.00004
 177        5PZ        -0.00002   0.00002   0.00008  -0.00039   0.00026
 178        6D 0        0.00000   0.00000  -0.00003  -0.00001   0.00002
 179        6D+1       -0.00000   0.00000   0.00001  -0.00020   0.00018
 180        6D-1        0.00000   0.00001   0.00004  -0.00002   0.00003
 181        6D+2       -0.00000   0.00003   0.00005   0.00014  -0.00013
 182        6D-2       -0.00000  -0.00003  -0.00002   0.00004  -0.00005
 183 8   H  1S         -0.00000   0.00003  -0.00003   0.00016   0.00013
 184        2S          0.00002   0.00013  -0.00003  -0.00122  -0.00092
 185        3S          0.00002  -0.00002   0.00009  -0.00072  -0.00033
 186        4PX        -0.00000   0.00002  -0.00002  -0.00021  -0.00020
 187        4PY        -0.00000  -0.00002   0.00001  -0.00003  -0.00003
 188        4PZ        -0.00000   0.00000  -0.00000  -0.00011  -0.00012
 189        5PX        -0.00000   0.00003  -0.00011  -0.00039  -0.00031
 190        5PY        -0.00000  -0.00007   0.00009  -0.00005  -0.00004
 191        5PZ         0.00002  -0.00002   0.00008  -0.00039  -0.00026
 192        6D 0        0.00000   0.00000   0.00003   0.00001   0.00002
 193        6D+1        0.00000  -0.00000   0.00001  -0.00020  -0.00018
 194        6D-1       -0.00000  -0.00001   0.00004  -0.00002  -0.00003
 195        6D+2       -0.00000   0.00003  -0.00005  -0.00014  -0.00013
 196        6D-2       -0.00000  -0.00003   0.00002  -0.00004  -0.00005
 197 9   H  1S         -0.00000   0.00004  -0.00004   0.00013   0.00015
 198        2S          0.00003  -0.00043  -0.00030  -0.00082  -0.00118
 199        3S          0.00003  -0.00014  -0.00007  -0.00047  -0.00047
 200        4PX         0.00000  -0.00001   0.00003   0.00017   0.00018
 201        4PY        -0.00000  -0.00002   0.00002  -0.00000  -0.00000
 202        4PZ        -0.00000  -0.00001  -0.00002  -0.00017  -0.00017
 203        5PX         0.00001   0.00008   0.00016   0.00021   0.00027
 204        5PY        -0.00000  -0.00015   0.00009   0.00001  -0.00002
 205        5PZ         0.00002  -0.00011  -0.00003  -0.00035  -0.00045
 206        6D 0        0.00000   0.00000   0.00002  -0.00008  -0.00008
 207        6D+1       -0.00000   0.00002   0.00002   0.00019   0.00021
 208        6D-1       -0.00000  -0.00003   0.00006   0.00000  -0.00001
 209        6D+2       -0.00000   0.00002  -0.00005  -0.00009  -0.00009
 210        6D-2        0.00000   0.00004  -0.00003   0.00000   0.00001
 211 10  H  1S         -0.00000   0.00009  -0.00011   0.00003   0.00005
 212        2S          0.00003  -0.00005  -0.00254  -0.00014  -0.00042
 213        3S          0.00002  -0.00041  -0.00037   0.00001  -0.00036
 214        4PX         0.00000  -0.00000   0.00000   0.00000   0.00000
 215        4PY         0.00000   0.00018  -0.00017  -0.00004  -0.00001
 216        4PZ        -0.00000  -0.00013   0.00010   0.00003   0.00002
 217        5PX        -0.00000   0.00000  -0.00001  -0.00000   0.00000
 218        5PY        -0.00000  -0.00001   0.00062   0.00009   0.00020
 219        5PZ         0.00001  -0.00012  -0.00073   0.00012  -0.00003
 220        6D 0        0.00000   0.00002  -0.00006  -0.00001   0.00001
 221        6D+1        0.00000  -0.00000   0.00000   0.00000   0.00000
 222        6D-1        0.00000   0.00017  -0.00011  -0.00005  -0.00002
 223        6D+2        0.00000   0.00009  -0.00010   0.00001   0.00004
 224        6D-2        0.00000   0.00000  -0.00000  -0.00000  -0.00000
 225 11  H  1S         -0.00000   0.00009   0.00011  -0.00003   0.00005
 226        2S          0.00003  -0.00005   0.00254   0.00014  -0.00042
 227        3S          0.00002  -0.00041   0.00037  -0.00001  -0.00036
 228        4PX         0.00000  -0.00000  -0.00000  -0.00000   0.00000
 229        4PY         0.00000   0.00018   0.00017   0.00004  -0.00001
 230        4PZ         0.00000   0.00013   0.00010   0.00003  -0.00002
 231        5PX        -0.00000   0.00000   0.00001   0.00000   0.00000
 232        5PY        -0.00000  -0.00001  -0.00062  -0.00009   0.00020
 233        5PZ        -0.00001   0.00012  -0.00073   0.00012   0.00003
 234        6D 0        0.00000   0.00002   0.00006   0.00001   0.00001
 235        6D+1       -0.00000   0.00000   0.00000   0.00000  -0.00000
 236        6D-1       -0.00000  -0.00017  -0.00011  -0.00005   0.00002
 237        6D+2        0.00000   0.00009   0.00010  -0.00001   0.00004
 238        6D-2        0.00000   0.00000   0.00000   0.00000  -0.00000
 239 12  H  1S         -0.00000  -0.00000   0.00000   0.00000  -0.00002
 240        2S         -0.00005  -0.00013   0.00000   0.00000   0.00015
 241        3S          0.00007  -0.00013   0.00000   0.00000   0.00035
 242        4PX         0.00000   0.00001   0.00000   0.00000   0.00001
 243        4PY         0.00001  -0.00002   0.00000   0.00000  -0.00001
 244        4PZ         0.00000   0.00000   0.00000  -0.00001   0.00000
 245        5PX        -0.00000  -0.00003   0.00000   0.00000  -0.00002
 246        5PY        -0.00000  -0.00004   0.00000   0.00000   0.00010
 247        5PZ         0.00000   0.00000   0.00001  -0.00001   0.00000
 248        6D 0       -0.00001   0.00000   0.00000   0.00000  -0.00001
 249        6D+1        0.00000   0.00000   0.00001  -0.00001   0.00000
 250        6D-1        0.00000   0.00000   0.00000   0.00000   0.00000
 251        6D+2       -0.00000   0.00003   0.00000   0.00000   0.00000
 252        6D-2        0.00001  -0.00001   0.00000   0.00000   0.00000
 253 13  H  1S         -0.00000  -0.00002   0.00000   0.00000  -0.00002
 254        2S         -0.00004  -0.00007   0.00000   0.00000   0.00015
 255        3S          0.00007   0.00044   0.00000   0.00000   0.00050
 256        4PX        -0.00001   0.00001   0.00000   0.00000  -0.00000
 257        4PY         0.00000  -0.00003   0.00000   0.00000  -0.00001
 258        4PZ         0.00000   0.00000  -0.00000  -0.00002   0.00000
 259        5PX         0.00000   0.00006   0.00000   0.00000  -0.00001
 260        5PY        -0.00000   0.00011   0.00000   0.00000   0.00008
 261        5PZ         0.00000   0.00000   0.00004   0.00002   0.00000
 262        6D 0       -0.00001   0.00000   0.00000   0.00000  -0.00000
 263        6D+1        0.00000   0.00000  -0.00001   0.00000   0.00000
 264        6D-1        0.00000   0.00000   0.00000   0.00001   0.00000
 265        6D+2        0.00001  -0.00003   0.00000   0.00000  -0.00000
 266        6D-2       -0.00001   0.00000   0.00000   0.00000  -0.00000
                           6         7         8         9        10
                           O         O         O         O         O
     Eigenvalues --    -6.11046  -4.21660  -4.21642  -4.21609  -1.09080
   1 1   C  1S          0.00002  -0.00001  -0.00001  -0.00001  -0.12103
   2        2S          0.00012   0.00000   0.00004  -0.00005   0.28459
   3        3S          0.00004  -0.00001   0.00000   0.00002   0.05796
   4        4S         -0.00138   0.00019   0.00065  -0.00110   0.09980
   5        5PX        -0.00000   0.00000   0.00000   0.00000   0.00001
   6        5PY         0.00001  -0.00002  -0.00004  -0.00000  -0.02094
   7        5PZ         0.00002   0.00000  -0.00000  -0.00002  -0.03982
   8        6PX         0.00001   0.00006  -0.00003  -0.00001  -0.00014
   9        6PY        -0.00018   0.00013   0.00027  -0.00010  -0.01889
  10        6PZ        -0.00031   0.00011   0.00019   0.00026  -0.03101
  11        7PX        -0.00004  -0.00002   0.00000  -0.00004   0.00006
  12        7PY         0.00060  -0.00001  -0.00009   0.00022  -0.00279
  13        7PZ        -0.00006   0.00002   0.00019   0.00048  -0.00340
  14        8D 0        0.00003  -0.00001  -0.00001  -0.00001   0.00841
  15        8D+1        0.00000  -0.00000   0.00001  -0.00000  -0.00004
  16        8D-1       -0.00002  -0.00000   0.00000   0.00002  -0.00051
  17        8D+2        0.00001   0.00000   0.00001  -0.00000  -0.00657
  18        8D-2       -0.00000  -0.00001   0.00001  -0.00000  -0.00009
  19        9D 0       -0.00023   0.00007   0.00003  -0.00022   0.00542
  20        9D+1       -0.00001   0.00006  -0.00002   0.00005  -0.00021
  21        9D-1        0.00006   0.00003   0.00006  -0.00021   0.00399
  22        9D+2        0.00004  -0.00004  -0.00007  -0.00005  -0.00954
  23        9D-2       -0.00001   0.00002  -0.00001   0.00001  -0.00031
  24       10F 0        0.00006  -0.00001  -0.00003   0.00000  -0.00591
  25       10F+1       -0.00000   0.00001   0.00000  -0.00000  -0.00002
  26       10F-1        0.00003  -0.00001  -0.00001  -0.00000  -0.00023
  27       10F+2        0.00004  -0.00001  -0.00002   0.00000  -0.00413
  28       10F-2        0.00000  -0.00001   0.00000  -0.00000  -0.00002
  29       10F+3       -0.00001   0.00000  -0.00000   0.00000   0.00002
  30       10F-3        0.00003  -0.00000  -0.00002  -0.00001   0.00040
  31 2   C  1S          0.00002  -0.00001  -0.00001   0.00001  -0.12103
  32        2S          0.00012   0.00000   0.00004   0.00005   0.28459
  33        3S          0.00004  -0.00001   0.00000  -0.00002   0.05796
  34        4S         -0.00138   0.00019   0.00065   0.00110   0.09980
  35        5PX        -0.00000   0.00000   0.00000  -0.00000   0.00001
  36        5PY         0.00001  -0.00002  -0.00004   0.00000  -0.02094
  37        5PZ        -0.00002  -0.00000   0.00000  -0.00002   0.03982
  38        6PX         0.00001   0.00006  -0.00003   0.00001  -0.00014
  39        6PY        -0.00018   0.00013   0.00027   0.00010  -0.01889
  40        6PZ         0.00031  -0.00011  -0.00019   0.00026   0.03101
  41        7PX        -0.00004  -0.00002   0.00000   0.00004   0.00006
  42        7PY         0.00060  -0.00001  -0.00009  -0.00022  -0.00279
  43        7PZ         0.00006  -0.00002  -0.00019   0.00048   0.00340
  44        8D 0        0.00003  -0.00001  -0.00001   0.00001   0.00841
  45        8D+1       -0.00000   0.00000  -0.00001  -0.00000   0.00004
  46        8D-1        0.00002   0.00000  -0.00000   0.00002   0.00051
  47        8D+2        0.00001   0.00000   0.00001   0.00000  -0.00657
  48        8D-2       -0.00000  -0.00001   0.00001   0.00000  -0.00009
  49        9D 0       -0.00023   0.00007   0.00003   0.00022   0.00542
  50        9D+1        0.00001  -0.00006   0.00002   0.00005   0.00021
  51        9D-1       -0.00006  -0.00003  -0.00006  -0.00021  -0.00399
  52        9D+2        0.00004  -0.00004  -0.00007   0.00005  -0.00954
  53        9D-2       -0.00001   0.00002  -0.00001  -0.00001  -0.00031
  54       10F 0       -0.00006   0.00001   0.00003   0.00000   0.00591
  55       10F+1       -0.00000   0.00001   0.00000   0.00000  -0.00002
  56       10F-1        0.00003  -0.00001  -0.00001   0.00000  -0.00023
  57       10F+2       -0.00004   0.00001   0.00002   0.00000   0.00413
  58       10F-2       -0.00000   0.00001  -0.00000  -0.00000   0.00002
  59       10F+3       -0.00001   0.00000  -0.00000  -0.00000   0.00002
  60       10F-3        0.00003  -0.00000  -0.00002   0.00001   0.00040
  61 3   C  1S         -0.00013  -0.00008  -0.00029   0.00033  -0.07478
  62        2S          0.00034   0.00018   0.00073  -0.00090   0.17893
  63        3S          0.00001  -0.00001  -0.00005   0.00013   0.03556
  64        4S          0.00130   0.00008   0.00035  -0.00169   0.03964
  65        5PX         0.00002   0.00005   0.00003  -0.00005  -0.00007
  66        5PY        -0.00012  -0.00004  -0.00020   0.00022   0.02318
  67        5PZ         0.00012   0.00007   0.00024  -0.00020   0.01964
  68        6PX         0.00010   0.00032   0.00010  -0.00025  -0.00071
  69        6PY        -0.00022  -0.00009  -0.00064   0.00132   0.02629
  70        6PZ         0.00033   0.00024   0.00111  -0.00121   0.02259
  71        7PX         0.00004   0.00017   0.00006  -0.00013  -0.00106
  72        7PY         0.00048  -0.00004  -0.00050   0.00077   0.00277
  73        7PZ         0.00010   0.00014   0.00048  -0.00103  -0.00523
  74        8D 0        0.00004   0.00002   0.00010  -0.00005   0.00094
  75        8D+1        0.00001   0.00005   0.00003  -0.00005   0.00005
  76        8D-1       -0.00003  -0.00005  -0.00021   0.00023   0.00365
  77        8D+2       -0.00001  -0.00001  -0.00007   0.00011  -0.00185
  78        8D-2       -0.00001  -0.00003  -0.00002   0.00005   0.00011
  79        9D 0       -0.00022   0.00014   0.00040  -0.00006   0.00133
  80        9D+1       -0.00005   0.00016   0.00005  -0.00015   0.00056
  81        9D-1       -0.00018   0.00000  -0.00034   0.00085   0.00294
  82        9D+2       -0.00008   0.00005  -0.00025   0.00035   0.00029
  83        9D-2       -0.00002  -0.00032   0.00004   0.00018   0.00066
  84       10F 0        0.00000   0.00002   0.00004   0.00005   0.00045
  85       10F+1        0.00001   0.00005   0.00002  -0.00003   0.00085
  86       10F-1       -0.00005  -0.00002  -0.00013   0.00012  -0.00019
  87       10F+2       -0.00005   0.00002  -0.00006   0.00016  -0.00366
  88       10F-2       -0.00001  -0.00008  -0.00000   0.00007  -0.00050
  89       10F+3       -0.00001  -0.00005   0.00001   0.00005  -0.00037
  90       10F-3       -0.00000  -0.00003   0.00000  -0.00005  -0.00108
  91 4   C  1S         -0.00013  -0.00008  -0.00029  -0.00033  -0.07478
  92        2S          0.00034   0.00018   0.00073   0.00090   0.17893
  93        3S          0.00001  -0.00001  -0.00005  -0.00013   0.03556
  94        4S          0.00130   0.00008   0.00035   0.00169   0.03964
  95        5PX         0.00002   0.00005   0.00003   0.00005  -0.00007
  96        5PY        -0.00012  -0.00004  -0.00020  -0.00022   0.02318
  97        5PZ        -0.00012  -0.00007  -0.00024  -0.00020  -0.01964
  98        6PX         0.00010   0.00032   0.00010   0.00025  -0.00071
  99        6PY        -0.00022  -0.00009  -0.00064  -0.00132   0.02629
 100        6PZ        -0.00033  -0.00024  -0.00111  -0.00121  -0.02259
 101        7PX         0.00004   0.00017   0.00006   0.00013  -0.00106
 102        7PY         0.00048  -0.00004  -0.00050  -0.00077   0.00277
 103        7PZ        -0.00010  -0.00014  -0.00048  -0.00103   0.00523
 104        8D 0        0.00004   0.00002   0.00010   0.00005   0.00094
 105        8D+1       -0.00001  -0.00005  -0.00003  -0.00005  -0.00005
 106        8D-1        0.00003   0.00005   0.00021   0.00023  -0.00365
 107        8D+2       -0.00001  -0.00001  -0.00007  -0.00011  -0.00185
 108        8D-2       -0.00001  -0.00003  -0.00002  -0.00005   0.00011
 109        9D 0       -0.00022   0.00014   0.00040   0.00006   0.00133
 110        9D+1        0.00005  -0.00016  -0.00005  -0.00015  -0.00056
 111        9D-1        0.00018  -0.00000   0.00034   0.00085  -0.00294
 112        9D+2       -0.00008   0.00005  -0.00025  -0.00035   0.00029
 113        9D-2       -0.00002  -0.00032   0.00004  -0.00018   0.00066
 114       10F 0       -0.00000  -0.00002  -0.00004   0.00005  -0.00045
 115       10F+1        0.00001   0.00005   0.00002   0.00003   0.00085
 116       10F-1       -0.00005  -0.00002  -0.00013  -0.00012  -0.00019
 117       10F+2        0.00005  -0.00002   0.00006   0.00016   0.00366
 118       10F-2        0.00001   0.00008   0.00000   0.00007   0.00050
 119       10F+3       -0.00001  -0.00005   0.00001  -0.00005  -0.00037
 120       10F-3       -0.00000  -0.00003   0.00000   0.00005  -0.00108
 121 5   Si 1S         -0.26720  -0.00011  -0.00030   0.00000   0.01100
 122        2S          1.00274   0.00051   0.00152   0.00000  -0.04264
 123        3S         -0.01366   0.00014   0.00062   0.00000   0.08310
 124        4S          0.05171  -0.00012  -0.00041   0.00000   0.00850
 125        5S          0.00494  -0.00036  -0.00118   0.00000   0.02022
 126        6PX         0.00012   0.82517  -0.40811   0.00000   0.00399
 127        6PY        -0.00100   0.40810   0.82526   0.00000  -0.02305
 128        6PZ         0.00000   0.00000   0.00000   0.92059   0.00000
 129        7PX        -0.00015   0.00195  -0.00085   0.00000  -0.00839
 130        7PY         0.00067   0.00093   0.00153   0.00000   0.04514
 131        7PZ         0.00000   0.00000   0.00000   0.00122   0.00000
 132        8PX         0.00006   0.11929  -0.05894   0.00000  -0.00076
 133        8PY        -0.00043   0.05894   0.11911   0.00000   0.00424
 134        8PZ         0.00000   0.00000   0.00000   0.13314   0.00000
 135        9PX        -0.00004  -0.00040   0.00025   0.00000  -0.00212
 136        9PY         0.00039  -0.00032  -0.00081   0.00000   0.01203
 137        9PZ         0.00000   0.00000   0.00000  -0.00109   0.00000
 138       10D 0        0.00020  -0.00002  -0.00034   0.00000   0.00498
 139       10D+1        0.00000   0.00000   0.00000   0.00019   0.00000
 140       10D-1        0.00000   0.00000   0.00000  -0.00084   0.00000
 141       10D+2       -0.00038  -0.00009   0.00042   0.00000  -0.00628
 142       10D-2       -0.00014   0.00034   0.00012   0.00000  -0.00312
 143       11D 0        0.00012  -0.00001  -0.00021   0.00000   0.00294
 144       11D+1        0.00000   0.00000   0.00000   0.00015   0.00000
 145       11D-1        0.00000   0.00000   0.00000  -0.00077   0.00000
 146       11D+2       -0.00007   0.00002   0.00031   0.00000  -0.00935
 147       11D-2       -0.00002   0.00003   0.00012   0.00000  -0.00347
 148       12F 0        0.00000   0.00000   0.00000  -0.00002   0.00000
 149       12F+1        0.00003   0.00000   0.00001   0.00000  -0.00092
 150       12F-1       -0.00012   0.00001  -0.00001   0.00000   0.00389
 151       12F+2        0.00000   0.00000   0.00000   0.00028   0.00000
 152       12F-2        0.00000   0.00000   0.00000   0.00014   0.00000
 153       12F+3       -0.00013   0.00003   0.00008   0.00000   0.00107
 154       12F-3        0.00010   0.00003  -0.00009   0.00000  -0.00247
 155 6   H  1S         -0.00001   0.00002  -0.00002   0.00003   0.02378
 156        2S         -0.00018  -0.00006   0.00025   0.00016   0.02560
 157        3S         -0.00035   0.00003   0.00014   0.00025   0.00001
 158        4PX         0.00001   0.00001   0.00000   0.00002  -0.00147
 159        4PY         0.00000  -0.00000   0.00000  -0.00002   0.00044
 160        4PZ         0.00001  -0.00001   0.00001  -0.00001  -0.00159
 161        5PX        -0.00005   0.00000  -0.00004  -0.00013  -0.00015
 162        5PY        -0.00004   0.00009   0.00000   0.00004   0.00034
 163        5PZ         0.00010   0.00004  -0.00013   0.00003  -0.00151
 164        6D 0       -0.00000  -0.00001   0.00000  -0.00002   0.00009
 165        6D+1       -0.00001   0.00001   0.00001   0.00000   0.00025
 166        6D-1        0.00002  -0.00003  -0.00001  -0.00004  -0.00025
 167        6D+2        0.00001  -0.00001   0.00000   0.00003  -0.00006
 168        6D-2        0.00000   0.00000  -0.00001   0.00001  -0.00010
 169 7   H  1S         -0.00002  -0.00004   0.00001   0.00002   0.02439
 170        2S         -0.00008   0.00016   0.00026   0.00010   0.02525
 171        3S         -0.00029   0.00008   0.00014   0.00019  -0.00002
 172        4PX        -0.00002  -0.00000  -0.00000  -0.00002   0.00177
 173        4PY         0.00001   0.00001  -0.00001  -0.00002   0.00070
 174        4PZ         0.00000   0.00001  -0.00000  -0.00001  -0.00123
 175        5PX         0.00006   0.00005   0.00007   0.00010  -0.00003
 176        5PY        -0.00004  -0.00009   0.00009   0.00004   0.00056
 177        5PZ         0.00008  -0.00011  -0.00007   0.00007  -0.00141
 178        6D 0        0.00000   0.00000  -0.00001  -0.00002   0.00005
 179        6D+1        0.00000  -0.00001  -0.00001   0.00002  -0.00026
 180        6D-1        0.00002   0.00002  -0.00003  -0.00003  -0.00032
 181        6D+2        0.00001   0.00000   0.00000   0.00002  -0.00011
 182        6D-2       -0.00001  -0.00000   0.00001   0.00001   0.00022
 183 8   H  1S         -0.00002  -0.00004   0.00001  -0.00002   0.02439
 184        2S         -0.00008   0.00016   0.00026  -0.00010   0.02525
 185        3S         -0.00029   0.00008   0.00014  -0.00019  -0.00002
 186        4PX        -0.00002  -0.00000  -0.00000   0.00002   0.00177
 187        4PY         0.00001   0.00001  -0.00001   0.00002   0.00070
 188        4PZ        -0.00000  -0.00001   0.00000  -0.00001   0.00123
 189        5PX         0.00006   0.00005   0.00007  -0.00010  -0.00003
 190        5PY        -0.00004  -0.00009   0.00009  -0.00004   0.00056
 191        5PZ        -0.00008   0.00011   0.00007   0.00007   0.00141
 192        6D 0        0.00000   0.00000  -0.00001   0.00002   0.00005
 193        6D+1       -0.00000   0.00001   0.00001   0.00002   0.00026
 194        6D-1       -0.00002  -0.00002   0.00003  -0.00003   0.00032
 195        6D+2        0.00001   0.00000   0.00000  -0.00002  -0.00011
 196        6D-2       -0.00001  -0.00000   0.00001  -0.00001   0.00022
 197 9   H  1S         -0.00001   0.00002  -0.00002  -0.00003   0.02378
 198        2S         -0.00018  -0.00006   0.00025  -0.00016   0.02560
 199        3S         -0.00035   0.00003   0.00014  -0.00025   0.00001
 200        4PX         0.00001   0.00001   0.00000  -0.00002  -0.00147
 201        4PY         0.00000  -0.00000   0.00000   0.00002   0.00044
 202        4PZ        -0.00001   0.00001  -0.00001  -0.00001   0.00159
 203        5PX        -0.00005   0.00000  -0.00004   0.00013  -0.00015
 204        5PY        -0.00004   0.00009   0.00000  -0.00004   0.00034
 205        5PZ        -0.00010  -0.00004   0.00013   0.00003   0.00151
 206        6D 0       -0.00000  -0.00001   0.00000   0.00002   0.00009
 207        6D+1        0.00001  -0.00001  -0.00001   0.00000  -0.00025
 208        6D-1       -0.00002   0.00003   0.00001  -0.00004   0.00025
 209        6D+2        0.00001  -0.00001   0.00000  -0.00003  -0.00006
 210        6D-2        0.00000   0.00000  -0.00001  -0.00001  -0.00010
 211 10  H  1S          0.00000   0.00000   0.00000  -0.00001   0.03444
 212        2S          0.00031  -0.00018  -0.00041  -0.00010   0.01728
 213        3S         -0.00012  -0.00002  -0.00002   0.00003  -0.00051
 214        4PX        -0.00000  -0.00000  -0.00000  -0.00000   0.00002
 215        4PY        -0.00002   0.00001   0.00001  -0.00000  -0.00213
 216        4PZ         0.00002  -0.00000  -0.00001   0.00000   0.00172
 217        5PX         0.00002  -0.00002   0.00001   0.00001  -0.00001
 218        5PY        -0.00020   0.00008   0.00017   0.00008   0.00544
 219        5PZ         0.00002  -0.00003  -0.00008   0.00006  -0.00371
 220        6D 0       -0.00000   0.00000  -0.00000   0.00001   0.00040
 221        6D+1       -0.00000   0.00000  -0.00000  -0.00000  -0.00001
 222        6D-1       -0.00002   0.00001   0.00002  -0.00001   0.00067
 223        6D+2       -0.00003   0.00001   0.00001   0.00000   0.00018
 224        6D-2       -0.00000   0.00001  -0.00000  -0.00000   0.00000
 225 11  H  1S          0.00000   0.00000   0.00000   0.00001   0.03444
 226        2S          0.00031  -0.00018  -0.00041   0.00010   0.01728
 227        3S         -0.00012  -0.00002  -0.00002  -0.00003  -0.00051
 228        4PX        -0.00000  -0.00000  -0.00000   0.00000   0.00002
 229        4PY        -0.00002   0.00001   0.00001   0.00000  -0.00213
 230        4PZ        -0.00002   0.00000   0.00001   0.00000  -0.00172
 231        5PX         0.00002  -0.00002   0.00001  -0.00001  -0.00001
 232        5PY        -0.00020   0.00008   0.00017  -0.00008   0.00544
 233        5PZ        -0.00002   0.00003   0.00008   0.00006   0.00371
 234        6D 0       -0.00000   0.00000  -0.00000  -0.00001   0.00040
 235        6D+1        0.00000  -0.00000   0.00000  -0.00000   0.00001
 236        6D-1        0.00002  -0.00001  -0.00002  -0.00001  -0.00067
 237        6D+2       -0.00003   0.00001   0.00001  -0.00000   0.00018
 238        6D-2       -0.00000   0.00001  -0.00000   0.00000   0.00000
 239 12  H  1S          0.00013  -0.00100  -0.00041   0.00000   0.00354
 240        2S          0.00153  -0.00160  -0.00099   0.00000   0.00682
 241        3S         -0.00064  -0.00037  -0.00013   0.00000   0.00363
 242        4PX         0.00004  -0.00019  -0.00016   0.00000   0.00018
 243        4PY         0.00003  -0.00027  -0.00006   0.00000   0.00034
 244        4PZ         0.00000   0.00000   0.00000   0.00009   0.00000
 245        5PX         0.00032  -0.00039  -0.00036   0.00000   0.00108
 246        5PY         0.00044  -0.00057  -0.00033   0.00000   0.00114
 247        5PZ         0.00000   0.00000   0.00000   0.00008   0.00000
 248        6D 0       -0.00006   0.00001   0.00003   0.00000  -0.00017
 249        6D+1        0.00000   0.00000   0.00000   0.00003   0.00000
 250        6D-1        0.00000   0.00000   0.00000   0.00003   0.00000
 251        6D+2       -0.00002   0.00004  -0.00003   0.00000  -0.00013
 252        6D-2        0.00011  -0.00002  -0.00005   0.00000   0.00022
 253 13  H  1S          0.00013   0.00072  -0.00078   0.00000   0.00400
 254        2S          0.00155   0.00115  -0.00162   0.00000   0.00710
 255        3S         -0.00070   0.00032  -0.00024   0.00000   0.00320
 256        4PX        -0.00005  -0.00020   0.00028   0.00000  -0.00040
 257        4PY         0.00002   0.00014  -0.00005   0.00000   0.00031
 258        4PZ         0.00000   0.00000   0.00000   0.00009   0.00000
 259        5PX        -0.00048  -0.00040   0.00071   0.00000  -0.00132
 260        5PY         0.00022   0.00028  -0.00025   0.00000   0.00082
 261        5PZ         0.00000   0.00000   0.00000   0.00008   0.00000
 262        6D 0       -0.00006   0.00000   0.00003   0.00000  -0.00024
 263        6D+1        0.00000   0.00000   0.00000  -0.00004   0.00000
 264        6D-1        0.00000   0.00000   0.00000   0.00002   0.00000
 265        6D+2        0.00008  -0.00003  -0.00006   0.00000   0.00011
 266        6D-2       -0.00008  -0.00005   0.00002   0.00000  -0.00041
                          11        12        13        14        15
                           O         O         O         O         O
     Eigenvalues --    -0.95931  -0.88998  -0.71371  -0.69221  -0.64012
   1 1   C  1S          0.06061   0.07777  -0.09091   0.00048   0.00189
   2        2S         -0.15070  -0.18748   0.23192  -0.00138  -0.00511
   3        3S         -0.03113  -0.03828   0.04784  -0.00091   0.00093
   4        4S         -0.07690  -0.09746   0.18506  -0.01435   0.00757
   5        5PX         0.00013   0.00041  -0.00032   0.00473   0.00472
   6        5PY         0.02814  -0.05440   0.04262  -0.04430   0.12771
   7        5PZ        -0.04652   0.07204   0.07176  -0.08716   0.04783
   8        6PX         0.00011   0.00064  -0.00032   0.00639   0.00684
   9        6PY         0.03314  -0.07243   0.05026  -0.06048   0.16358
  10        6PZ        -0.05154   0.07125   0.08748  -0.10503   0.05422
  11        7PX        -0.00092  -0.00014  -0.00000   0.00216   0.00246
  12        7PY         0.00349  -0.01150   0.01421  -0.01975   0.06207
  13        7PZ        -0.00123   0.01189   0.01698  -0.02806   0.02448
  14        8D 0        0.00053  -0.00957  -0.00102   0.00378  -0.00235
  15        8D+1        0.00005   0.00001  -0.00008  -0.00013  -0.00019
  16        8D-1        0.00441  -0.00318   0.00574   0.00165   0.00349
  17        8D+2        0.00613   0.00068  -0.00753   0.00164  -0.00093
  18        8D-2        0.00002   0.00003  -0.00021  -0.00033  -0.00054
  19        9D 0       -0.00249  -0.00769   0.00113  -0.00025  -0.00401
  20        9D+1        0.00005   0.00012  -0.00005  -0.00035  -0.00014
  21        9D-1        0.00029  -0.00826   0.00380  -0.00009   0.00611
  22        9D+2        0.00822   0.00384  -0.01435   0.00218  -0.00072
  23        9D-2        0.00037   0.00021  -0.00042  -0.00041  -0.00071
  24       10F 0        0.00268   0.00481  -0.00369  -0.00173   0.00189
  25       10F+1        0.00004   0.00002   0.00003   0.00014   0.00021
  26       10F-1       -0.00005  -0.00145  -0.00095   0.00021   0.00317
  27       10F+2        0.00287   0.00259  -0.00401   0.00117   0.00018
  28       10F-2       -0.00002   0.00002  -0.00006   0.00002  -0.00013
  29       10F+3        0.00003  -0.00007   0.00008  -0.00021  -0.00009
  30       10F-3       -0.00066   0.00087  -0.00042   0.00139  -0.00215
  31 2   C  1S         -0.06061   0.07777   0.09091   0.00048   0.00189
  32        2S          0.15070  -0.18748  -0.23192  -0.00138  -0.00511
  33        3S          0.03113  -0.03828  -0.04784  -0.00091   0.00093
  34        4S          0.07690  -0.09746  -0.18506  -0.01435   0.00757
  35        5PX        -0.00013   0.00041   0.00032   0.00473   0.00472
  36        5PY        -0.02814  -0.05440  -0.04262  -0.04430   0.12771
  37        5PZ        -0.04652  -0.07204   0.07176   0.08716  -0.04783
  38        6PX        -0.00011   0.00064   0.00032   0.00639   0.00684
  39        6PY        -0.03314  -0.07243  -0.05026  -0.06048   0.16358
  40        6PZ        -0.05154  -0.07125   0.08748   0.10503  -0.05422
  41        7PX         0.00092  -0.00014   0.00000   0.00216   0.00246
  42        7PY        -0.00349  -0.01150  -0.01421  -0.01975   0.06207
  43        7PZ        -0.00123  -0.01189   0.01698   0.02806  -0.02448
  44        8D 0       -0.00053  -0.00957   0.00102   0.00378  -0.00235
  45        8D+1        0.00005  -0.00001  -0.00008   0.00013   0.00019
  46        8D-1        0.00441   0.00318   0.00574  -0.00165  -0.00349
  47        8D+2       -0.00613   0.00068   0.00753   0.00164  -0.00093
  48        8D-2       -0.00002   0.00003   0.00021  -0.00033  -0.00054
  49        9D 0        0.00249  -0.00769  -0.00113  -0.00025  -0.00401
  50        9D+1        0.00005  -0.00012  -0.00005   0.00035   0.00014
  51        9D-1        0.00029   0.00826   0.00380   0.00009  -0.00611
  52        9D+2       -0.00822   0.00384   0.01435   0.00218  -0.00072
  53        9D-2       -0.00037   0.00021   0.00042  -0.00041  -0.00071
  54       10F 0        0.00268  -0.00481  -0.00369   0.00173  -0.00189
  55       10F+1       -0.00004   0.00002  -0.00003   0.00014   0.00021
  56       10F-1        0.00005  -0.00145   0.00095   0.00021   0.00317
  57       10F+2        0.00287  -0.00259  -0.00401  -0.00117  -0.00018
  58       10F-2       -0.00002  -0.00002  -0.00006  -0.00002   0.00013
  59       10F+3       -0.00003  -0.00007  -0.00008  -0.00021  -0.00009
  60       10F-3        0.00066   0.00087   0.00042   0.00139  -0.00215
  61 3   C  1S         -0.11733  -0.09173  -0.04429   0.02812   0.00983
  62        2S          0.28541   0.22479   0.11049  -0.06893  -0.02610
  63        3S          0.05681   0.04370   0.02285  -0.01546  -0.00548
  64        4S          0.10801   0.11701   0.08121  -0.04665   0.00095
  65        5PX        -0.00145  -0.00074  -0.00329   0.01038   0.01602
  66        5PY         0.02115  -0.02291  -0.06869  -0.03642  -0.04999
  67        5PZ        -0.00585  -0.01660  -0.04101   0.08762  -0.04514
  68        6PX        -0.00257  -0.00042  -0.00311   0.01373   0.01872
  69        6PY         0.02957  -0.02608  -0.08404  -0.05271  -0.06548
  70        6PZ        -0.00746  -0.01612  -0.04839   0.11519  -0.05711
  71        7PX        -0.00421   0.00076  -0.00094   0.00533   0.00653
  72        7PY         0.00975  -0.00299  -0.02353  -0.02238  -0.02682
  73        7PZ        -0.01198  -0.00559  -0.01725   0.04513  -0.01645
  74        8D 0       -0.00061   0.00076   0.00260   0.00280  -0.00127
  75        8D+1       -0.00032  -0.00017  -0.00009   0.00147  -0.00105
  76        8D-1        0.00332  -0.00114  -0.00329  -0.00255  -0.00593
  77        8D+2       -0.00034   0.00276   0.00722  -0.00354   0.00248
  78        8D-2        0.00042   0.00033   0.00035  -0.00103  -0.00014
  79        9D 0       -0.00181   0.00292   0.00091   0.00816  -0.00862
  80        9D+1       -0.00039   0.00013  -0.00121   0.00336   0.00081
  81        9D-1        0.00711  -0.00089  -0.00434  -0.00709  -0.01175
  82        9D+2        0.00111   0.00140   0.00681  -0.00599   0.00091
  83        9D-2        0.00106  -0.00003   0.00033  -0.00130  -0.00049
  84       10F 0       -0.00056  -0.00043   0.00012   0.00041  -0.00047
  85       10F+1        0.00122   0.00105   0.00043  -0.00007   0.00012
  86       10F-1       -0.00066  -0.00114   0.00011   0.00052  -0.00232
  87       10F+2       -0.00555  -0.00485  -0.00144   0.00064   0.00121
  88       10F-2       -0.00053  -0.00057  -0.00038  -0.00021  -0.00020
  89       10F+3       -0.00048  -0.00047  -0.00025  -0.00017  -0.00040
  90       10F-3       -0.00244  -0.00149   0.00048   0.00148   0.00053
  91 4   C  1S          0.11733  -0.09173   0.04429   0.02812   0.00983
  92        2S         -0.28541   0.22479  -0.11049  -0.06893  -0.02610
  93        3S         -0.05681   0.04370  -0.02285  -0.01546  -0.00548
  94        4S         -0.10801   0.11701  -0.08121  -0.04665   0.00095
  95        5PX         0.00145  -0.00074   0.00329   0.01038   0.01602
  96        5PY        -0.02115  -0.02291   0.06869  -0.03642  -0.04999
  97        5PZ        -0.00585   0.01660  -0.04101  -0.08762   0.04514
  98        6PX         0.00257  -0.00042   0.00311   0.01373   0.01872
  99        6PY        -0.02957  -0.02608   0.08404  -0.05271  -0.06548
 100        6PZ        -0.00746   0.01612  -0.04839  -0.11519   0.05711
 101        7PX         0.00421   0.00076   0.00094   0.00533   0.00653
 102        7PY        -0.00975  -0.00299   0.02353  -0.02238  -0.02682
 103        7PZ        -0.01198   0.00559  -0.01725  -0.04513   0.01645
 104        8D 0        0.00061   0.00076  -0.00260   0.00280  -0.00127
 105        8D+1       -0.00032   0.00017  -0.00009  -0.00147   0.00105
 106        8D-1        0.00332   0.00114  -0.00329   0.00255   0.00593
 107        8D+2        0.00034   0.00276  -0.00722  -0.00354   0.00248
 108        8D-2       -0.00042   0.00033  -0.00035  -0.00103  -0.00014
 109        9D 0        0.00181   0.00292  -0.00091   0.00816  -0.00862
 110        9D+1       -0.00039  -0.00013  -0.00121  -0.00336  -0.00081
 111        9D-1        0.00711   0.00089  -0.00434   0.00709   0.01175
 112        9D+2       -0.00111   0.00140  -0.00681  -0.00599   0.00091
 113        9D-2       -0.00106  -0.00003  -0.00033  -0.00130  -0.00049
 114       10F 0       -0.00056   0.00043   0.00012  -0.00041   0.00047
 115       10F+1       -0.00122   0.00105  -0.00043  -0.00007   0.00012
 116       10F-1        0.00066  -0.00114  -0.00011   0.00052  -0.00232
 117       10F+2       -0.00555   0.00485  -0.00144  -0.00064  -0.00121
 118       10F-2       -0.00053   0.00057  -0.00038   0.00021   0.00020
 119       10F+3        0.00048  -0.00047   0.00025  -0.00017  -0.00040
 120       10F-3        0.00244  -0.00149  -0.00048   0.00148   0.00053
 121 5   Si 1S          0.00000   0.02075   0.00000   0.04086   0.02857
 122        2S          0.00000  -0.08089   0.00000  -0.16133  -0.11380
 123        3S          0.00000   0.16318   0.00000   0.32969   0.23183
 124        4S          0.00000   0.01728   0.00000   0.03810   0.02836
 125        5S          0.00000   0.03107   0.00000   0.09622   0.09631
 126        6PX         0.00000   0.00555   0.00000  -0.00246  -0.01219
 127        6PY         0.00000  -0.02110   0.00000   0.00137   0.05292
 128        6PZ         0.03477   0.00000   0.03515   0.00000   0.00000
 129        7PX         0.00000  -0.01131   0.00000   0.00405   0.02676
 130        7PY         0.00000   0.04554   0.00000  -0.00460  -0.11462
 131        7PZ        -0.07522   0.00000  -0.07679   0.00000   0.00000
 132        8PX         0.00000  -0.00119   0.00000   0.00082   0.00283
 133        8PY         0.00000   0.00445   0.00000  -0.00119  -0.01227
 134        8PZ        -0.00717   0.00000  -0.00795   0.00000   0.00000
 135        9PX         0.00000  -0.00333   0.00000   0.00038   0.00749
 136        9PY         0.00000   0.00959   0.00000  -0.00356  -0.02118
 137        9PZ        -0.01998   0.00000  -0.01701   0.00000   0.00000
 138       10D 0        0.00000   0.00864   0.00000  -0.00654  -0.01098
 139       10D+1        0.00399   0.00000   0.00419   0.00000   0.00000
 140       10D-1       -0.02204   0.00000  -0.01387   0.00000   0.00000
 141       10D+2        0.00000  -0.00437   0.00000  -0.00537   0.01161
 142       10D-2        0.00000  -0.00436   0.00000   0.00029   0.00535
 143       11D 0        0.00000   0.01078   0.00000  -0.01311  -0.00874
 144       11D+1        0.00532   0.00000   0.00535   0.00000   0.00000
 145       11D-1       -0.02514   0.00000  -0.01722   0.00000   0.00000
 146       11D+2        0.00000  -0.00592   0.00000  -0.00352   0.01793
 147       11D-2        0.00000  -0.00342   0.00000  -0.00018   0.00856
 148       12F 0        0.00106   0.00000  -0.00274   0.00000   0.00000
 149       12F+1        0.00000  -0.00218   0.00000  -0.00167  -0.00124
 150       12F-1        0.00000   0.00911   0.00000   0.00781   0.00825
 151       12F+2        0.00622   0.00000   0.00226   0.00000   0.00000
 152       12F-2        0.00293   0.00000   0.00206   0.00000   0.00000
 153       12F+3        0.00000   0.00238   0.00000   0.00769   0.00638
 154       12F-3        0.00000  -0.00246   0.00000  -0.01008  -0.00540
 155 6   H  1S         -0.05449   0.05081  -0.04368  -0.04850   0.02455
 156        2S         -0.06246   0.06064  -0.05876  -0.06379   0.04002
 157        3S         -0.00501   0.00804  -0.01571  -0.01910   0.01153
 158        4PX         0.00387  -0.00359   0.00333   0.00423  -0.00173
 159        4PY        -0.00071  -0.00020   0.00137  -0.00129  -0.00080
 160        4PZ         0.00361  -0.00324   0.00233   0.00210  -0.00160
 161        5PX         0.00154  -0.00127   0.00305   0.00435  -0.00384
 162        5PY        -0.00127  -0.00045   0.00387  -0.00313  -0.00299
 163        5PZ         0.00235  -0.00332   0.00175  -0.00145  -0.00031
 164        6D 0       -0.00017   0.00034  -0.00013   0.00044  -0.00006
 165        6D+1       -0.00082   0.00076  -0.00063  -0.00083   0.00048
 166        6D-1        0.00028   0.00011  -0.00080   0.00060   0.00043
 167        6D+2       -0.00011   0.00016  -0.00066  -0.00072   0.00042
 168        6D-2        0.00042  -0.00010  -0.00059   0.00060   0.00023
 169 7   H  1S         -0.05383   0.05080  -0.04594  -0.04433   0.00482
 170        2S         -0.05949   0.06185  -0.06413  -0.05873   0.00368
 171        3S         -0.00358   0.00886  -0.01735  -0.01806   0.00070
 172        4PX        -0.00448   0.00435  -0.00419  -0.00418   0.00088
 173        4PY        -0.00123   0.00033   0.00079  -0.00177  -0.00099
 174        4PZ         0.00236  -0.00220   0.00153   0.00062   0.00043
 175        5PX        -0.00149   0.00229  -0.00465  -0.00333   0.00108
 176        5PY        -0.00147  -0.00055   0.00271  -0.00309  -0.00278
 177        5PZ         0.00163  -0.00298   0.00136  -0.00231   0.00336
 178        6D 0        0.00018  -0.00002   0.00017   0.00065  -0.00037
 179        6D+1        0.00068  -0.00077   0.00058   0.00023   0.00031
 180        6D-1        0.00025   0.00014  -0.00047   0.00034   0.00042
 181        6D+2       -0.00022   0.00038  -0.00101  -0.00069   0.00048
 182        6D-2       -0.00054   0.00007   0.00044  -0.00083  -0.00036
 183 8   H  1S          0.05383   0.05080   0.04594  -0.04433   0.00482
 184        2S          0.05949   0.06185   0.06413  -0.05873   0.00368
 185        3S          0.00358   0.00886   0.01735  -0.01806   0.00070
 186        4PX         0.00448   0.00435   0.00419  -0.00418   0.00088
 187        4PY         0.00123   0.00033  -0.00079  -0.00177  -0.00099
 188        4PZ         0.00236   0.00220   0.00153  -0.00062  -0.00043
 189        5PX         0.00149   0.00229   0.00465  -0.00333   0.00108
 190        5PY         0.00147  -0.00055  -0.00271  -0.00309  -0.00278
 191        5PZ         0.00163   0.00298   0.00136   0.00231  -0.00336
 192        6D 0       -0.00018  -0.00002  -0.00017   0.00065  -0.00037
 193        6D+1        0.00068   0.00077   0.00058  -0.00023  -0.00031
 194        6D-1        0.00025  -0.00014  -0.00047  -0.00034  -0.00042
 195        6D+2        0.00022   0.00038   0.00101  -0.00069   0.00048
 196        6D-2        0.00054   0.00007  -0.00044  -0.00083  -0.00036
 197 9   H  1S          0.05449   0.05081   0.04368  -0.04850   0.02455
 198        2S          0.06246   0.06064   0.05876  -0.06379   0.04002
 199        3S          0.00501   0.00804   0.01571  -0.01910   0.01153
 200        4PX        -0.00387  -0.00359  -0.00333   0.00423  -0.00173
 201        4PY         0.00071  -0.00020  -0.00137  -0.00129  -0.00080
 202        4PZ         0.00361   0.00324   0.00233  -0.00210   0.00160
 203        5PX        -0.00154  -0.00127  -0.00305   0.00435  -0.00384
 204        5PY         0.00127  -0.00045  -0.00387  -0.00313  -0.00299
 205        5PZ         0.00235   0.00332   0.00175   0.00145   0.00031
 206        6D 0        0.00017   0.00034   0.00013   0.00044  -0.00006
 207        6D+1       -0.00082  -0.00076  -0.00063   0.00083  -0.00048
 208        6D-1        0.00028  -0.00011  -0.00080  -0.00060  -0.00043
 209        6D+2        0.00011   0.00016   0.00066  -0.00072   0.00042
 210        6D-2       -0.00042  -0.00010   0.00059   0.00060   0.00023
 211 10  H  1S          0.02778  -0.04372  -0.09983  -0.04947   0.08474
 212        2S          0.02771  -0.03546  -0.13189  -0.06592   0.12151
 213        3S          0.00257  -0.00672  -0.03803  -0.01728   0.03688
 214        4PX         0.00002  -0.00004  -0.00012  -0.00001   0.00019
 215        4PY        -0.00267   0.00241   0.00824   0.00460  -0.00633
 216        4PZ         0.00061  -0.00333  -0.00368  -0.00157   0.00486
 217        5PX         0.00004   0.00011  -0.00007   0.00018   0.00040
 218        5PY        -0.00088  -0.00575   0.00708   0.00210  -0.00404
 219        5PZ         0.00015   0.00028  -0.00026   0.00072   0.00375
 220        6D 0       -0.00008  -0.00103   0.00096   0.00073   0.00036
 221        6D+1       -0.00000  -0.00001  -0.00002   0.00001   0.00005
 222        6D-1       -0.00010   0.00037   0.00096   0.00059  -0.00193
 223        6D+2       -0.00059  -0.00047   0.00152   0.00095  -0.00084
 224        6D-2       -0.00001  -0.00002   0.00004   0.00001  -0.00006
 225 11  H  1S         -0.02778  -0.04372   0.09983  -0.04947   0.08474
 226        2S         -0.02771  -0.03546   0.13189  -0.06592   0.12151
 227        3S         -0.00257  -0.00672   0.03803  -0.01728   0.03688
 228        4PX        -0.00002  -0.00004   0.00012  -0.00001   0.00019
 229        4PY         0.00267   0.00241  -0.00824   0.00460  -0.00633
 230        4PZ         0.00061   0.00333  -0.00368   0.00157  -0.00486
 231        5PX        -0.00004   0.00011   0.00007   0.00018   0.00040
 232        5PY         0.00088  -0.00575  -0.00708   0.00210  -0.00404
 233        5PZ         0.00015  -0.00028  -0.00026  -0.00072  -0.00375
 234        6D 0        0.00008  -0.00103  -0.00096   0.00073   0.00036
 235        6D+1       -0.00000   0.00001  -0.00002  -0.00001  -0.00005
 236        6D-1       -0.00010  -0.00037   0.00096  -0.00059   0.00193
 237        6D+2        0.00059  -0.00047  -0.00152   0.00095  -0.00084
 238        6D-2        0.00001  -0.00002  -0.00004   0.00001  -0.00006
 239 12  H  1S          0.00000   0.01429   0.00000   0.05766   0.06689
 240        2S          0.00000   0.02414   0.00000   0.09239   0.10697
 241        3S          0.00000   0.00932   0.00000   0.03847   0.04930
 242        4PX         0.00000   0.00078   0.00000   0.00288   0.00314
 243        4PY         0.00000   0.00117   0.00000   0.00297   0.00342
 244        4PZ        -0.00015   0.00000  -0.00034   0.00000   0.00000
 245        5PX         0.00000   0.00199   0.00000   0.00443   0.00488
 246        5PY         0.00000   0.00271   0.00000   0.00561   0.00382
 247        5PZ        -0.00092   0.00000  -0.00112   0.00000   0.00000
 248        6D 0        0.00000  -0.00041   0.00000  -0.00090  -0.00089
 249        6D+1       -0.00013   0.00000  -0.00022   0.00000   0.00000
 250        6D-1       -0.00027   0.00000  -0.00026   0.00000   0.00000
 251        6D+2        0.00000  -0.00024   0.00000  -0.00008   0.00011
 252        6D-2        0.00000   0.00076   0.00000   0.00137   0.00166
 253 13  H  1S          0.00000   0.01427   0.00000   0.05830   0.06621
 254        2S          0.00000   0.02208   0.00000   0.09633   0.10497
 255        3S          0.00000   0.00915   0.00000   0.04040   0.04623
 256        4PX         0.00000  -0.00126   0.00000  -0.00401  -0.00433
 257        4PY         0.00000   0.00062   0.00000   0.00146   0.00148
 258        4PZ        -0.00022   0.00000  -0.00029   0.00000   0.00000
 259        5PX         0.00000  -0.00247   0.00000  -0.00724  -0.00630
 260        5PY         0.00000   0.00141   0.00000   0.00312   0.00054
 261        5PZ        -0.00055   0.00000  -0.00100   0.00000   0.00000
 262        6D 0        0.00000  -0.00040   0.00000  -0.00100  -0.00089
 263        6D+1        0.00020   0.00000   0.00026   0.00000   0.00000
 264        6D-1       -0.00014   0.00000  -0.00014   0.00000   0.00000
 265        6D+2        0.00000   0.00046   0.00000   0.00113   0.00147
 266        6D-2        0.00000  -0.00058   0.00000  -0.00107  -0.00065
                          16        17        18        19        20
                           O         O         O         O         O
     Eigenvalues --    -0.59028  -0.55527  -0.53313  -0.50138  -0.46429
   1 1   C  1S         -0.00090  -0.00232   0.00266   0.01422   0.00146
   2        2S          0.00200   0.00624  -0.00472  -0.03941  -0.00411
   3        3S          0.00002   0.00141  -0.00212  -0.00676  -0.00094
   4        4S          0.00071  -0.00109   0.02786  -0.04454  -0.00360
   5        5PX         0.06202  -0.02405  -0.00738  -0.00335  -0.03404
   6        5PY        -0.01938  -0.00277  -0.04254   0.13765   0.00578
   7        5PZ         0.01490   0.00050   0.19332  -0.00250  -0.00357
   8        6PX         0.08746  -0.03260  -0.01051  -0.00472  -0.04598
   9        6PY        -0.02548  -0.00302  -0.06263   0.17791   0.00455
  10        6PZ         0.01875   0.00042   0.23101  -0.00379  -0.00461
  11        7PX         0.03674  -0.00629  -0.00540  -0.00213  -0.03110
  12        7PY        -0.01163   0.00282  -0.02333   0.11351  -0.00001
  13        7PZ         0.00256  -0.00152   0.09889  -0.00030  -0.00329
  14        8D 0       -0.00080  -0.00053  -0.01448   0.00261  -0.00010
  15        8D+1       -0.00163  -0.00327   0.00017  -0.00036   0.00138
  16        8D-1       -0.00088  -0.00009  -0.00051   0.01575   0.00027
  17        8D+2       -0.00053  -0.00042  -0.00814   0.00276   0.00011
  18        8D-2       -0.00399   0.00367   0.00019   0.00026   0.00099
  19        9D 0        0.00062  -0.00081  -0.01131   0.00484   0.00065
  20        9D+1       -0.00386  -0.00921   0.00043  -0.00070   0.00239
  21        9D-1       -0.00190  -0.00095  -0.00433   0.03393  -0.00116
  22        9D+2       -0.00049  -0.00010  -0.00995   0.00569   0.00115
  23        9D-2       -0.00655   0.00790   0.00090   0.00084   0.00085
  24       10F 0        0.00012  -0.00023   0.00332   0.00193  -0.00002
  25       10F+1        0.00216   0.00003  -0.00025   0.00004  -0.00126
  26       10F-1       -0.00076   0.00043  -0.00159  -0.00365   0.00018
  27       10F+2       -0.00038  -0.00014  -0.00208   0.00250   0.00012
  28       10F-2       -0.00081   0.00193   0.00011   0.00009   0.00027
  29       10F+3       -0.00201   0.00154   0.00023   0.00026   0.00053
  30       10F-3        0.00027   0.00011   0.00138  -0.00403  -0.00017
  31 2   C  1S         -0.00090   0.00232   0.00266  -0.01422   0.00146
  32        2S          0.00200  -0.00624  -0.00472   0.03941  -0.00411
  33        3S          0.00002  -0.00141  -0.00212   0.00676  -0.00094
  34        4S          0.00071   0.00109   0.02786   0.04454  -0.00360
  35        5PX         0.06202   0.02405  -0.00738   0.00335  -0.03404
  36        5PY        -0.01938   0.00277  -0.04254  -0.13765   0.00578
  37        5PZ        -0.01490   0.00050  -0.19332  -0.00250   0.00357
  38        6PX         0.08746   0.03260  -0.01051   0.00472  -0.04598
  39        6PY        -0.02548   0.00302  -0.06263  -0.17791   0.00455
  40        6PZ        -0.01875   0.00042  -0.23101  -0.00379   0.00461
  41        7PX         0.03674   0.00629  -0.00540   0.00213  -0.03110
  42        7PY        -0.01163  -0.00282  -0.02333  -0.11351  -0.00001
  43        7PZ        -0.00256  -0.00152  -0.09889  -0.00030   0.00329
  44        8D 0       -0.00080   0.00053  -0.01448  -0.00261  -0.00010
  45        8D+1        0.00163  -0.00327  -0.00017  -0.00036  -0.00138
  46        8D-1        0.00088  -0.00009   0.00051   0.01575  -0.00027
  47        8D+2       -0.00053   0.00042  -0.00814  -0.00276   0.00011
  48        8D-2       -0.00399  -0.00367   0.00019  -0.00026   0.00099
  49        9D 0        0.00062   0.00081  -0.01131  -0.00484   0.00065
  50        9D+1        0.00386  -0.00921  -0.00043  -0.00070  -0.00239
  51        9D-1        0.00190  -0.00095   0.00433   0.03393   0.00116
  52        9D+2       -0.00049   0.00010  -0.00995  -0.00569   0.00115
  53        9D-2       -0.00655  -0.00790   0.00090  -0.00084   0.00085
  54       10F 0       -0.00012  -0.00023  -0.00332   0.00193   0.00002
  55       10F+1        0.00216  -0.00003  -0.00025  -0.00004  -0.00126
  56       10F-1       -0.00076  -0.00043  -0.00159   0.00365   0.00018
  57       10F+2        0.00038  -0.00014   0.00208   0.00250  -0.00012
  58       10F-2        0.00081   0.00193  -0.00011   0.00009  -0.00027
  59       10F+3       -0.00201  -0.00154   0.00023  -0.00026   0.00053
  60       10F-3        0.00027  -0.00011   0.00138   0.00403  -0.00017
  61 3   C  1S         -0.00134   0.00007   0.00489  -0.02166   0.00076
  62        2S          0.00388   0.00011  -0.00949   0.05957  -0.00168
  63        3S          0.00066   0.00014  -0.00353   0.01172  -0.00037
  64        4S          0.00059  -0.00715  -0.02558   0.00817   0.00004
  65        5PX         0.14370   0.16309  -0.01299   0.01308  -0.04474
  66        5PY         0.02521   0.00536   0.09055   0.06775  -0.00512
  67        5PZ        -0.00341  -0.01927   0.08687   0.13671  -0.00080
  68        6PX         0.17696   0.20347  -0.01638   0.01757  -0.05464
  69        6PY         0.03200   0.00626   0.11886   0.08317  -0.00749
  70        6PZ        -0.00332  -0.02251   0.11490   0.17580  -0.00186
  71        7PX         0.08721   0.10440  -0.00780   0.00809  -0.01534
  72        7PY         0.01636  -0.00013   0.04440   0.03583  -0.00558
  73        7PZ        -0.00243  -0.01542   0.05714   0.08036  -0.00310
  74        8D 0        0.00213   0.00306  -0.00380  -0.00098  -0.00086
  75        8D+1       -0.00821  -0.01173   0.00189   0.00098   0.00373
  76        8D-1        0.00063  -0.00108   0.00336   0.00503   0.00010
  77        8D+2       -0.00259  -0.00146  -0.01071  -0.00974   0.00147
  78        8D-2       -0.00017  -0.00092  -0.00073  -0.00088  -0.00136
  79        9D 0        0.00236   0.00245  -0.00203   0.00552  -0.00093
  80        9D+1       -0.00118  -0.00826   0.00361   0.00202   0.00578
  81        9D-1        0.00235  -0.00096   0.00376   0.00936  -0.00001
  82        9D+2       -0.00146  -0.00150  -0.01620  -0.01011   0.00492
  83        9D-2       -0.00017  -0.00378  -0.00076  -0.00080  -0.00823
  84       10F 0       -0.00025  -0.00023  -0.00160  -0.00111   0.00025
  85       10F+1        0.00090   0.00050  -0.00027   0.00010  -0.00037
  86       10F-1        0.00025  -0.00008  -0.00120   0.00087  -0.00006
  87       10F+2       -0.00002   0.00032  -0.00107  -0.00165   0.00047
  88       10F-2        0.00046   0.00039   0.00002   0.00022  -0.00154
  89       10F+3       -0.00148  -0.00062   0.00029   0.00008  -0.00038
  90       10F-3       -0.00055   0.00006  -0.00214  -0.00152  -0.00050
  91 4   C  1S         -0.00134  -0.00007   0.00489   0.02166   0.00076
  92        2S          0.00388  -0.00011  -0.00949  -0.05957  -0.00168
  93        3S          0.00066  -0.00014  -0.00353  -0.01172  -0.00037
  94        4S          0.00059   0.00715  -0.02558  -0.00817   0.00004
  95        5PX         0.14370  -0.16309  -0.01299  -0.01308  -0.04474
  96        5PY         0.02521  -0.00536   0.09055  -0.06775  -0.00512
  97        5PZ         0.00341  -0.01927  -0.08687   0.13671   0.00080
  98        6PX         0.17696  -0.20347  -0.01638  -0.01757  -0.05464
  99        6PY         0.03200  -0.00626   0.11886  -0.08317  -0.00749
 100        6PZ         0.00332  -0.02251  -0.11490   0.17580   0.00186
 101        7PX         0.08721  -0.10440  -0.00780  -0.00809  -0.01534
 102        7PY         0.01636   0.00013   0.04440  -0.03583  -0.00558
 103        7PZ         0.00243  -0.01542  -0.05714   0.08036   0.00310
 104        8D 0        0.00213  -0.00306  -0.00380   0.00098  -0.00086
 105        8D+1        0.00821  -0.01173  -0.00189   0.00098  -0.00373
 106        8D-1       -0.00063  -0.00108  -0.00336   0.00503  -0.00010
 107        8D+2       -0.00259   0.00146  -0.01071   0.00974   0.00147
 108        8D-2       -0.00017   0.00092  -0.00073   0.00088  -0.00136
 109        9D 0        0.00236  -0.00245  -0.00203  -0.00552  -0.00093
 110        9D+1        0.00118  -0.00826  -0.00361   0.00202  -0.00578
 111        9D-1       -0.00235  -0.00096  -0.00376   0.00936   0.00001
 112        9D+2       -0.00146   0.00150  -0.01620   0.01011   0.00492
 113        9D-2       -0.00017   0.00378  -0.00076   0.00080  -0.00823
 114       10F 0        0.00025  -0.00023   0.00160  -0.00111  -0.00025
 115       10F+1        0.00090  -0.00050  -0.00027  -0.00010  -0.00037
 116       10F-1        0.00025   0.00008  -0.00120  -0.00087  -0.00006
 117       10F+2        0.00002   0.00032   0.00107  -0.00165  -0.00047
 118       10F-2       -0.00046   0.00039  -0.00002   0.00022   0.00154
 119       10F+3       -0.00148   0.00062   0.00029  -0.00008  -0.00038
 120       10F-3       -0.00055  -0.00006  -0.00214   0.00152  -0.00050
 121 5   Si 1S         -0.00209   0.00000   0.00734   0.00000   0.00034
 122        2S          0.00814   0.00000  -0.02959   0.00000  -0.00122
 123        3S         -0.01750   0.00000   0.06041   0.00000   0.00318
 124        4S         -0.00118   0.00000   0.00929   0.00000   0.00063
 125        5S         -0.01456   0.00000   0.02038   0.00000  -0.00391
 126        6PX        -0.05155   0.00000  -0.00064   0.00000  -0.12883
 127        6PY        -0.01579   0.00000   0.00395   0.00000  -0.02711
 128        6PZ         0.00000   0.00683   0.00000   0.02631   0.00000
 129        7PX         0.11376   0.00000   0.00123   0.00000   0.31317
 130        7PY         0.03650   0.00000  -0.01313   0.00000   0.06593
 131        7PZ         0.00000  -0.01537   0.00000  -0.06545   0.00000
 132        8PX         0.01165   0.00000   0.00027   0.00000   0.03284
 133        8PY         0.00349   0.00000  -0.00082   0.00000   0.00689
 134        8PZ         0.00000  -0.00159   0.00000  -0.00682   0.00000
 135        9PX         0.01812   0.00000   0.00177   0.00000   0.12701
 136        9PY         0.00343   0.00000  -0.01170   0.00000   0.02532
 137        9PZ         0.00000  -0.00210   0.00000  -0.02678   0.00000
 138       10D 0        0.00508   0.00000  -0.02089   0.00000  -0.00389
 139       10D+1        0.00000  -0.01580   0.00000   0.00365   0.00000
 140       10D-1        0.00000  -0.00319   0.00000  -0.02602   0.00000
 141       10D+2        0.00189   0.00000  -0.00399   0.00000   0.04195
 142       10D-2       -0.00629   0.00000   0.00092   0.00000  -0.07892
 143       11D 0        0.00234   0.00000  -0.02148   0.00000  -0.00198
 144       11D+1        0.00000  -0.01934   0.00000   0.00288   0.00000
 145       11D-1        0.00000  -0.00516   0.00000  -0.02944   0.00000
 146       11D+2        0.00007   0.00000  -0.00433   0.00000   0.03904
 147       11D-2       -0.00113   0.00000  -0.00071   0.00000  -0.07119
 148       12F 0        0.00000  -0.00216   0.00000   0.00822   0.00000
 149       12F+1        0.00237   0.00000   0.00121   0.00000  -0.02118
 150       12F-1       -0.00036   0.00000  -0.00363   0.00000  -0.00561
 151       12F+2        0.00000   0.00313   0.00000   0.01156   0.00000
 152       12F-2        0.00000  -0.00803   0.00000   0.00276   0.00000
 153       12F+3       -0.00671   0.00000   0.00430   0.00000  -0.00530
 154       12F-3       -0.00334   0.00000  -0.00406   0.00000  -0.00600
 155 6   H  1S          0.07557  -0.09755  -0.05924   0.05264  -0.02434
 156        2S          0.12314  -0.15759  -0.08498   0.08342  -0.04333
 157        3S          0.04303  -0.06226  -0.04150   0.04487  -0.03501
 158        4PX        -0.00310   0.00433   0.00429  -0.00460   0.00104
 159        4PY         0.00107  -0.00052   0.00198  -0.00120  -0.00062
 160        4PZ        -0.00621   0.00734   0.00248  -0.00117   0.00162
 161        5PX        -0.00406   0.00445   0.00379  -0.00768   0.00067
 162        5PY         0.00120  -0.00145   0.00566  -0.00360   0.00052
 163        5PZ        -0.01027   0.01050  -0.00140   0.00173   0.00360
 164        6D 0        0.00133  -0.00127   0.00019  -0.00077  -0.00037
 165        6D+1        0.00174  -0.00202  -0.00067   0.00084  -0.00057
 166        6D-1       -0.00041   0.00028  -0.00105   0.00057   0.00009
 167        6D+2        0.00017  -0.00044  -0.00114   0.00126  -0.00002
 168        6D-2       -0.00039   0.00022  -0.00089   0.00059   0.00006
 169 7   H  1S         -0.08970   0.09921  -0.03656   0.05138   0.03051
 170        2S         -0.14506   0.15666  -0.05067   0.08086   0.04922
 171        3S         -0.04959   0.06497  -0.02548   0.04391   0.04097
 172        4PX        -0.00592   0.00603  -0.00367   0.00473   0.00176
 173        4PY        -0.00117   0.00156   0.00160  -0.00061   0.00086
 174        4PZ         0.00543  -0.00588  -0.00009   0.00013  -0.00137
 175        5PX        -0.00828   0.00625  -0.00327   0.00674   0.00175
 176        5PY        -0.00030   0.00264   0.00539  -0.00261  -0.00007
 177        5PZ         0.00806  -0.00751  -0.00381   0.00406  -0.00174
 178        6D 0       -0.00025   0.00022   0.00048  -0.00094  -0.00017
 179        6D+1        0.00204  -0.00201  -0.00012  -0.00006  -0.00064
 180        6D-1        0.00025  -0.00055  -0.00081   0.00042  -0.00023
 181        6D+2       -0.00103   0.00089  -0.00126   0.00146   0.00028
 182        6D-2       -0.00041   0.00067   0.00084  -0.00032   0.00019
 183 8   H  1S         -0.08970  -0.09921  -0.03656  -0.05138   0.03051
 184        2S         -0.14506  -0.15666  -0.05067  -0.08086   0.04922
 185        3S         -0.04959  -0.06497  -0.02548  -0.04391   0.04097
 186        4PX        -0.00592  -0.00603  -0.00367  -0.00473   0.00176
 187        4PY        -0.00117  -0.00156   0.00160   0.00061   0.00086
 188        4PZ        -0.00543  -0.00588   0.00009   0.00013   0.00137
 189        5PX        -0.00828  -0.00625  -0.00327  -0.00674   0.00175
 190        5PY        -0.00030  -0.00264   0.00539   0.00261  -0.00007
 191        5PZ        -0.00806  -0.00751   0.00381   0.00406   0.00174
 192        6D 0       -0.00025  -0.00022   0.00048   0.00094  -0.00017
 193        6D+1       -0.00204  -0.00201   0.00012  -0.00006   0.00064
 194        6D-1       -0.00025  -0.00055   0.00081   0.00042   0.00023
 195        6D+2       -0.00103  -0.00089  -0.00126  -0.00146   0.00028
 196        6D-2       -0.00041  -0.00067   0.00084   0.00032   0.00019
 197 9   H  1S          0.07557   0.09755  -0.05924  -0.05264  -0.02434
 198        2S          0.12314   0.15759  -0.08498  -0.08342  -0.04333
 199        3S          0.04303   0.06226  -0.04150  -0.04487  -0.03501
 200        4PX        -0.00310  -0.00433   0.00429   0.00460   0.00104
 201        4PY         0.00107   0.00052   0.00198   0.00120  -0.00062
 202        4PZ         0.00621   0.00734  -0.00248  -0.00117  -0.00162
 203        5PX        -0.00406  -0.00445   0.00379   0.00768   0.00067
 204        5PY         0.00120   0.00145   0.00566   0.00360   0.00052
 205        5PZ         0.01027   0.01050   0.00140   0.00173  -0.00360
 206        6D 0        0.00133   0.00127   0.00019   0.00077  -0.00037
 207        6D+1       -0.00174  -0.00202   0.00067   0.00084   0.00057
 208        6D-1        0.00041   0.00028   0.00105   0.00057  -0.00009
 209        6D+2        0.00017   0.00044  -0.00114  -0.00126  -0.00002
 210        6D-2       -0.00039  -0.00022  -0.00089  -0.00059   0.00006
 211 10  H  1S         -0.00602  -0.00042   0.04580  -0.08190   0.00133
 212        2S         -0.00718  -0.00096   0.07854  -0.11694   0.00600
 213        3S         -0.00122   0.00028   0.03470  -0.05524   0.00317
 214        4PX         0.00107   0.00051  -0.00008  -0.00006  -0.00084
 215        4PY         0.00021  -0.00003  -0.00532   0.00554  -0.00005
 216        4PZ        -0.00072  -0.00006  -0.00114  -0.00368   0.00020
 217        5PX         0.00380   0.00175  -0.00045   0.00025  -0.00139
 218        5PY        -0.00068   0.00015  -0.01105  -0.00013  -0.00094
 219        5PZ        -0.00105   0.00008  -0.00312  -0.00364   0.00133
 220        6D 0       -0.00031  -0.00004  -0.00209   0.00057   0.00008
 221        6D+1        0.00023   0.00011  -0.00004  -0.00000  -0.00015
 222        6D-1        0.00029   0.00001  -0.00003   0.00117  -0.00017
 223        6D+2       -0.00009  -0.00007  -0.00186   0.00090   0.00001
 224        6D-2       -0.00033  -0.00031   0.00002   0.00002   0.00022
 225 11  H  1S         -0.00602   0.00042   0.04580   0.08190   0.00133
 226        2S         -0.00718   0.00096   0.07854   0.11694   0.00600
 227        3S         -0.00122  -0.00028   0.03470   0.05524   0.00317
 228        4PX         0.00107  -0.00051  -0.00008   0.00006  -0.00084
 229        4PY         0.00021   0.00003  -0.00532  -0.00554  -0.00005
 230        4PZ         0.00072  -0.00006   0.00114  -0.00368  -0.00020
 231        5PX         0.00380  -0.00175  -0.00045  -0.00025  -0.00139
 232        5PY        -0.00068  -0.00015  -0.01105   0.00013  -0.00094
 233        5PZ         0.00105   0.00008   0.00312  -0.00364  -0.00133
 234        6D 0       -0.00031   0.00004  -0.00209  -0.00057   0.00008
 235        6D+1       -0.00023   0.00011   0.00004  -0.00000   0.00015
 236        6D-1       -0.00029   0.00001   0.00003   0.00117   0.00017
 237        6D+2       -0.00009   0.00007  -0.00186  -0.00090   0.00001
 238        6D-2       -0.00033   0.00031   0.00002  -0.00002   0.00022
 239 12  H  1S         -0.03748   0.00000   0.01972   0.00000  -0.13073
 240        2S         -0.05525   0.00000   0.03028   0.00000  -0.20213
 241        3S         -0.03601   0.00000   0.01590   0.00000  -0.13708
 242        4PX        -0.00123   0.00000   0.00086   0.00000  -0.00324
 243        4PY        -0.00218   0.00000   0.00056   0.00000  -0.00479
 244        4PZ         0.00000   0.00046   0.00000   0.00011   0.00000
 245        5PX         0.00099   0.00000   0.00031   0.00000   0.00391
 246        5PY        -0.00192   0.00000   0.00101   0.00000  -0.00328
 247        5PZ         0.00000  -0.00055   0.00000  -0.00017   0.00000
 248        6D 0        0.00061   0.00000  -0.00004   0.00000   0.00001
 249        6D+1        0.00000   0.00011   0.00000   0.00021   0.00000
 250        6D-1        0.00000  -0.00016   0.00000  -0.00032   0.00000
 251        6D+2        0.00062   0.00000   0.00001   0.00000   0.00125
 252        6D-2       -0.00075   0.00000   0.00005   0.00000  -0.00043
 253 13  H  1S          0.02708   0.00000   0.01784   0.00000   0.13786
 254        2S          0.04382   0.00000   0.03028   0.00000   0.21333
 255        3S          0.02870   0.00000   0.01523   0.00000   0.14435
 256        4PX        -0.00157   0.00000  -0.00097   0.00000  -0.00547
 257        4PY         0.00110   0.00000   0.00015   0.00000   0.00271
 258        4PZ         0.00000  -0.00075   0.00000  -0.00007   0.00000
 259        5PX        -0.00044   0.00000  -0.00180   0.00000   0.00168
 260        5PY         0.00326   0.00000   0.00026   0.00000   0.00454
 261        5PZ         0.00000   0.00024   0.00000  -0.00090   0.00000
 262        6D 0       -0.00059   0.00000  -0.00013   0.00000  -0.00006
 263        6D+1        0.00000   0.00016   0.00000   0.00022   0.00000
 264        6D-1        0.00000   0.00020   0.00000  -0.00032   0.00000
 265        6D+2        0.00015   0.00000   0.00028   0.00000  -0.00023
 266        6D-2       -0.00095   0.00000   0.00003   0.00000  -0.00123
                          21        22        23        24        25
                           O         O         O         V         V
     Eigenvalues --    -0.44299  -0.41630  -0.34582   0.13584   0.14080
   1 1   C  1S          0.02065  -0.00401  -0.00154  -0.02114  -0.01037
   2        2S         -0.05464   0.00870   0.00433   0.07093   0.01680
   3        3S         -0.01107   0.00278   0.00077   0.02224  -0.00857
   4        4S         -0.05281  -0.01834   0.01708   0.59581   1.14156
   5        5PX         0.01791   0.00300   0.19046   0.00085  -0.02670
   6        5PY         0.07284   0.06629  -0.00225   0.02100  -0.02554
   7        5PZ         0.03116  -0.00879   0.00035   0.01799   0.01529
   8        6PX         0.02545   0.00424   0.26175   0.00703  -0.03374
   9        6PY         0.08539   0.08874  -0.00220   0.06554  -0.05305
  10        6PZ         0.02923  -0.01129   0.00126   0.03161  -0.02857
  11        7PX         0.01665   0.00162   0.23088   0.02961  -0.05442
  12        7PY         0.04807   0.07201  -0.00322   0.27790  -0.57258
  13        7PZ         0.02105   0.01414   0.00409   0.15378  -0.50261
  14        8D 0       -0.00659  -0.00425   0.00029   0.00434   0.00304
  15        8D+1       -0.00115   0.00029  -0.01453  -0.00108  -0.00266
  16        8D-1        0.00509   0.01029  -0.00055  -0.00406  -0.00261
  17        8D+2       -0.00338  -0.00259   0.00042  -0.00359   0.00445
  18        8D-2       -0.00061  -0.00060   0.00181   0.00126   0.00107
  19        9D 0       -0.01127  -0.01119  -0.00006  -0.00666   0.02912
  20        9D+1       -0.00220   0.00101  -0.03002   0.00213   0.00679
  21        9D-1        0.00445   0.02304  -0.00003   0.02488  -0.02605
  22        9D+2       -0.00424  -0.00521   0.00054  -0.02633  -0.02115
  23        9D-2       -0.00157  -0.00136  -0.00196  -0.00824  -0.00367
  24       10F 0        0.00235   0.00047  -0.00014   0.00010  -0.00435
  25       10F+1        0.00052  -0.00017   0.00631  -0.00001  -0.00065
  26       10F-1        0.00346   0.00313  -0.00001   0.00025  -0.00181
  27       10F+2        0.00165   0.00093  -0.00021  -0.00358  -0.00013
  28       10F-2       -0.00010  -0.00026   0.00033  -0.00061  -0.00012
  29       10F+3       -0.00039  -0.00026  -0.00155  -0.00053   0.00034
  30       10F-3        0.00008  -0.00079  -0.00026  -0.00026   0.00058
  31 2   C  1S          0.02065   0.00401  -0.00154  -0.02114   0.01037
  32        2S         -0.05464  -0.00870   0.00433   0.07093  -0.01680
  33        3S         -0.01107  -0.00278   0.00077   0.02224   0.00857
  34        4S         -0.05281   0.01834   0.01708   0.59581  -1.14156
  35        5PX         0.01791  -0.00300   0.19046   0.00085   0.02670
  36        5PY         0.07284  -0.06629  -0.00225   0.02100   0.02554
  37        5PZ        -0.03116  -0.00879  -0.00035  -0.01799   0.01529
  38        6PX         0.02545  -0.00424   0.26175   0.00703   0.03374
  39        6PY         0.08539  -0.08874  -0.00220   0.06554   0.05305
  40        6PZ        -0.02923  -0.01129  -0.00126  -0.03161  -0.02857
  41        7PX         0.01665  -0.00162   0.23088   0.02961   0.05442
  42        7PY         0.04807  -0.07201  -0.00322   0.27790   0.57258
  43        7PZ        -0.02105   0.01414  -0.00409  -0.15378  -0.50261
  44        8D 0       -0.00659   0.00425   0.00029   0.00434  -0.00304
  45        8D+1        0.00115   0.00029   0.01453   0.00108  -0.00266
  46        8D-1       -0.00509   0.01029   0.00055   0.00406  -0.00261
  47        8D+2       -0.00338   0.00259   0.00042  -0.00359  -0.00445
  48        8D-2       -0.00061   0.00060   0.00181   0.00126  -0.00107
  49        9D 0       -0.01127   0.01119  -0.00006  -0.00666  -0.02912
  50        9D+1        0.00220   0.00101   0.03002  -0.00213   0.00679
  51        9D-1       -0.00445   0.02304   0.00003  -0.02488  -0.02605
  52        9D+2       -0.00424   0.00521   0.00054  -0.02633   0.02115
  53        9D-2       -0.00157   0.00136  -0.00196  -0.00824   0.00367
  54       10F 0       -0.00235   0.00047   0.00014  -0.00010  -0.00435
  55       10F+1        0.00052   0.00017   0.00631  -0.00001   0.00065
  56       10F-1        0.00346  -0.00313  -0.00001   0.00025   0.00181
  57       10F+2       -0.00165   0.00093   0.00021   0.00358  -0.00013
  58       10F-2        0.00010  -0.00026  -0.00033   0.00061  -0.00012
  59       10F+3       -0.00039   0.00026  -0.00155  -0.00053  -0.00034
  60       10F-3        0.00008   0.00079  -0.00026  -0.00026  -0.00058
  61 3   C  1S         -0.01324   0.01063   0.00154  -0.03500  -0.04247
  62        2S          0.03662  -0.02951  -0.00417   0.12315   0.11200
  63        3S          0.00705  -0.00608  -0.00052   0.01314   0.00733
  64        4S          0.04689  -0.04336  -0.02662   2.20030   2.55729
  65        5PX         0.01174  -0.01586  -0.06057  -0.00928   0.00959
  66        5PY        -0.10385   0.13681   0.00680  -0.01019  -0.05171
  67        5PZ         0.08158  -0.10304  -0.00556  -0.02074   0.00113
  68        6PX         0.01732  -0.02135  -0.08158  -0.03821   0.02426
  69        6PY        -0.13814   0.17897   0.00928  -0.05343  -0.06836
  70        6PZ         0.10945  -0.13618  -0.00538  -0.15352  -0.08649
  71        7PX         0.00836  -0.01242  -0.09073  -0.18644   0.20833
  72        7PY        -0.08254   0.10989   0.00222  -0.25812  -0.51837
  73        7PZ         0.06804  -0.08933  -0.01152  -0.22773   0.32252
  74        8D 0        0.00199  -0.00032  -0.00190  -0.00258   0.00152
  75        8D+1        0.00199  -0.00212   0.01039   0.00187  -0.00173
  76        8D-1       -0.00804   0.00783   0.00127   0.00235   0.00169
  77        8D+2       -0.00127   0.00310   0.00143  -0.00012   0.00767
  78        8D-2       -0.00025   0.00126   0.00639   0.00041   0.00333
  79        9D 0        0.00696   0.00396  -0.00523   0.00681   0.04247
  80        9D+1        0.00231  -0.00301   0.02136  -0.00268  -0.01143
  81        9D-1       -0.01452   0.01059   0.00157   0.00325  -0.02343
  82        9D+2       -0.00118   0.00778   0.00091   0.07563   0.06473
  83        9D-2       -0.00015   0.00216   0.01495   0.00486   0.01132
  84       10F 0        0.00161   0.00045  -0.00024   0.00403   0.00499
  85       10F+1        0.00025   0.00011   0.00004   0.00523   0.00646
  86       10F-1       -0.00235   0.00009   0.00001  -0.00232  -0.00387
  87       10F+2        0.00044  -0.00045   0.00019  -0.01677  -0.01662
  88       10F-2        0.00006   0.00026   0.00230  -0.00272  -0.00194
  89       10F+3       -0.00041   0.00032  -0.00236  -0.00303  -0.00181
  90       10F-3        0.00100  -0.00114  -0.00026  -0.00317  -0.00273
  91 4   C  1S         -0.01324  -0.01063   0.00154  -0.03500   0.04247
  92        2S          0.03662   0.02951  -0.00417   0.12315  -0.11200
  93        3S          0.00705   0.00608  -0.00052   0.01314  -0.00733
  94        4S          0.04689   0.04336  -0.02662   2.20030  -2.55729
  95        5PX         0.01174   0.01586  -0.06057  -0.00928  -0.00959
  96        5PY        -0.10385  -0.13681   0.00680  -0.01019   0.05171
  97        5PZ        -0.08158  -0.10304   0.00556   0.02074   0.00113
  98        6PX         0.01732   0.02135  -0.08158  -0.03821  -0.02426
  99        6PY        -0.13814  -0.17897   0.00928  -0.05343   0.06836
 100        6PZ        -0.10945  -0.13618   0.00538   0.15352  -0.08649
 101        7PX         0.00836   0.01242  -0.09073  -0.18644  -0.20833
 102        7PY        -0.08254  -0.10989   0.00222  -0.25812   0.51837
 103        7PZ        -0.06804  -0.08933   0.01152   0.22773   0.32252
 104        8D 0        0.00199   0.00032  -0.00190  -0.00258  -0.00152
 105        8D+1       -0.00199  -0.00212  -0.01039  -0.00187  -0.00173
 106        8D-1        0.00804   0.00783  -0.00127  -0.00235   0.00169
 107        8D+2       -0.00127  -0.00310   0.00143  -0.00012  -0.00767
 108        8D-2       -0.00025  -0.00126   0.00639   0.00041  -0.00333
 109        9D 0        0.00696  -0.00396  -0.00523   0.00681  -0.04247
 110        9D+1       -0.00231  -0.00301  -0.02136   0.00268  -0.01143
 111        9D-1        0.01452   0.01059  -0.00157  -0.00325  -0.02343
 112        9D+2       -0.00118  -0.00778   0.00091   0.07563  -0.06473
 113        9D-2       -0.00015  -0.00216   0.01495   0.00486  -0.01132
 114       10F 0       -0.00161   0.00045   0.00024  -0.00403   0.00499
 115       10F+1        0.00025  -0.00011   0.00004   0.00523  -0.00646
 116       10F-1       -0.00235  -0.00009   0.00001  -0.00232   0.00387
 117       10F+2       -0.00044  -0.00045  -0.00019   0.01677  -0.01662
 118       10F-2       -0.00006   0.00026  -0.00230   0.00272  -0.00194
 119       10F+3       -0.00041  -0.00032  -0.00236  -0.00303   0.00181
 120       10F-3        0.00100   0.00114  -0.00026  -0.00317   0.00273
 121 5   Si 1S          0.00853   0.00000  -0.00264   0.00701   0.00000
 122        2S         -0.03354   0.00000   0.00966  -0.01288   0.00000
 123        3S          0.07268   0.00000  -0.02511   0.10969   0.00000
 124        4S          0.01150   0.00000  -0.00380   0.03917   0.00000
 125        5S          0.01272   0.00000   0.00137   0.01888   0.00000
 126        6PX         0.02810   0.00000  -0.00957  -0.00858   0.00000
 127        6PY        -0.12996   0.00000   0.01104   0.03814   0.00000
 128        6PZ         0.00000  -0.12964   0.00000   0.00000  -0.04337
 129        7PX        -0.06554   0.00000   0.02328   0.05201   0.00000
 130        7PY         0.30597   0.00000  -0.02475  -0.16232   0.00000
 131        7PZ         0.00000   0.30865   0.00000   0.00000   0.25360
 132        8PX        -0.00748   0.00000   0.00265  -0.00125   0.00000
 133        8PY         0.03466   0.00000  -0.00358  -0.00223   0.00000
 134        8PZ         0.00000   0.03434   0.00000   0.00000  -0.00366
 135        9PX        -0.02303   0.00000   0.05046   0.43380   0.00000
 136        9PY         0.10778   0.00000   0.01208  -1.17915   0.00000
 137        9PZ         0.00000   0.13094   0.00000   0.00000   2.02109
 138       10D 0        0.05027   0.00000  -0.00950  -0.17304   0.00000
 139       10D+1        0.00000  -0.01514   0.00000   0.00000  -0.05200
 140       10D-1        0.00000   0.05976   0.00000   0.00000   0.34386
 141       10D+2       -0.02048   0.00000   0.00273   0.10075   0.00000
 142       10D-2       -0.01547   0.00000   0.00321   0.06514   0.00000
 143       11D 0        0.05404   0.00000  -0.00950   0.03892   0.00000
 144       11D+1        0.00000  -0.01619   0.00000   0.00000   0.01836
 145       11D-1        0.00000   0.06423   0.00000   0.00000  -0.08109
 146       11D+2       -0.02688   0.00000   0.00684  -0.03490   0.00000
 147       11D-2       -0.01794   0.00000  -0.00488  -0.01915   0.00000
 148       12F 0        0.00000   0.00088   0.00000   0.00000  -0.01233
 149       12F+1       -0.00312   0.00000  -0.00482  -0.00030   0.00000
 150       12F-1        0.00994   0.00000  -0.00393  -0.00888   0.00000
 151       12F+2        0.00000  -0.01426   0.00000   0.00000  -0.02843
 152       12F-2        0.00000  -0.00771   0.00000   0.00000  -0.01076
 153       12F+3       -0.00842   0.00000  -0.00328   0.00809   0.00000
 154       12F-3        0.00919   0.00000  -0.00221  -0.01563   0.00000
 155 6   H  1S         -0.02615  -0.03680  -0.04570  -0.00556  -0.01345
 156        2S         -0.04354  -0.05531  -0.06312  -0.25522   0.25355
 157        3S         -0.02649  -0.04424  -0.05869  -0.73627   0.44960
 158        4PX         0.00232   0.00328   0.00129  -0.00531   0.00277
 159        4PY        -0.00223  -0.00349   0.00075  -0.00163   0.00142
 160        4PZ         0.00033   0.00020   0.00232  -0.00228   0.00278
 161        5PX         0.00464   0.00397  -0.00240   0.10202  -0.09311
 162        5PY        -0.00650  -0.00942   0.00140   0.00047  -0.00201
 163        5PZ        -0.00298  -0.00378   0.00004   0.08718  -0.08722
 164        6D 0        0.00069   0.00080  -0.00025  -0.00232   0.00149
 165        6D+1       -0.00040  -0.00045  -0.00041  -0.00741   0.00740
 166        6D-1        0.00101   0.00162  -0.00059   0.00045  -0.00143
 167        6D+2       -0.00049  -0.00077  -0.00017  -0.00518   0.00530
 168        6D-2        0.00069   0.00121  -0.00032   0.00006  -0.00129
 169 7   H  1S         -0.01698  -0.02583   0.05608   0.00639  -0.01360
 170        2S         -0.02540  -0.03908   0.08801  -0.29023   0.17587
 171        3S         -0.01880  -0.03171   0.06983  -0.90463   0.22186
 172        4PX        -0.00148  -0.00210   0.00295   0.00699  -0.00326
 173        4PY        -0.00270  -0.00383   0.00002  -0.00008   0.00210
 174        4PZ        -0.00079  -0.00106  -0.00155  -0.00225   0.00031
 175        5PX        -0.00146  -0.00133   0.00074  -0.13458   0.08730
 176        5PY        -0.00748  -0.00933   0.00040  -0.02158   0.00702
 177        5PZ        -0.00528  -0.00505  -0.00151   0.07624  -0.03476
 178        6D 0        0.00083   0.00081  -0.00016   0.00077  -0.00123
 179        6D+1       -0.00043  -0.00047  -0.00056   0.00733  -0.00342
 180        6D-1        0.00099   0.00114   0.00018   0.00176  -0.00131
 181        6D+2       -0.00018  -0.00022   0.00077  -0.00727   0.00519
 182        6D-2       -0.00128  -0.00166  -0.00002  -0.00261   0.00291
 183 8   H  1S         -0.01698   0.02583   0.05608   0.00639   0.01360
 184        2S         -0.02540   0.03908   0.08801  -0.29023  -0.17587
 185        3S         -0.01880   0.03171   0.06983  -0.90463  -0.22186
 186        4PX        -0.00148   0.00210   0.00295   0.00699   0.00326
 187        4PY        -0.00270   0.00383   0.00002  -0.00008  -0.00210
 188        4PZ         0.00079  -0.00106   0.00155   0.00225   0.00031
 189        5PX        -0.00146   0.00133   0.00074  -0.13458  -0.08730
 190        5PY        -0.00748   0.00933   0.00040  -0.02158  -0.00702
 191        5PZ         0.00528  -0.00505   0.00151  -0.07624  -0.03476
 192        6D 0        0.00083  -0.00081  -0.00016   0.00077   0.00123
 193        6D+1        0.00043  -0.00047   0.00056  -0.00733  -0.00342
 194        6D-1       -0.00099   0.00114  -0.00018  -0.00176  -0.00131
 195        6D+2       -0.00018   0.00022   0.00077  -0.00727  -0.00519
 196        6D-2       -0.00128   0.00166  -0.00002  -0.00261  -0.00291
 197 9   H  1S         -0.02615   0.03680  -0.04570  -0.00556   0.01345
 198        2S         -0.04354   0.05531  -0.06312  -0.25522  -0.25355
 199        3S         -0.02649   0.04424  -0.05869  -0.73627  -0.44960
 200        4PX         0.00232  -0.00328   0.00129  -0.00531  -0.00277
 201        4PY        -0.00223   0.00349   0.00075  -0.00163  -0.00142
 202        4PZ        -0.00033   0.00020  -0.00232   0.00228   0.00278
 203        5PX         0.00464  -0.00397  -0.00240   0.10202   0.09311
 204        5PY        -0.00650   0.00942   0.00140   0.00047   0.00201
 205        5PZ         0.00298  -0.00378  -0.00004  -0.08718  -0.08722
 206        6D 0        0.00069  -0.00080  -0.00025  -0.00232  -0.00149
 207        6D+1        0.00040  -0.00045   0.00041   0.00741   0.00740
 208        6D-1       -0.00101   0.00162   0.00059  -0.00045  -0.00143
 209        6D+2       -0.00049   0.00077  -0.00017  -0.00518  -0.00530
 210        6D-2        0.00069  -0.00121  -0.00032   0.00006   0.00129
 211 10  H  1S          0.04980  -0.05379  -0.00292   0.00046   0.01964
 212        2S          0.09375  -0.07588  -0.00801  -0.06253   0.00203
 213        3S          0.04903  -0.04677  -0.00502  -0.70979  -0.22110
 214        4PX         0.00050  -0.00013   0.00486   0.00024   0.00063
 215        4PY        -0.00303   0.00254   0.00021  -0.00801  -0.00019
 216        4PZ         0.00304  -0.00304  -0.00027   0.00444   0.00030
 217        5PX         0.00118  -0.00017   0.01356  -0.00032   0.00551
 218        5PY        -0.00697  -0.00224   0.00107   0.06377   0.01418
 219        5PZ         0.00561  -0.00122  -0.00049  -0.03816   0.01141
 220        6D 0        0.00051  -0.00047  -0.00003   0.00029   0.00223
 221        6D+1        0.00016  -0.00003   0.00158   0.00015  -0.00008
 222        6D-1       -0.00174   0.00107   0.00014   0.00276  -0.00001
 223        6D+2       -0.00053  -0.00031   0.00007   0.00224   0.00122
 224        6D-2       -0.00015   0.00003  -0.00167   0.00003  -0.00059
 225 11  H  1S          0.04980   0.05379  -0.00292   0.00046  -0.01964
 226        2S          0.09375   0.07588  -0.00801  -0.06253  -0.00203
 227        3S          0.04903   0.04677  -0.00502  -0.70979   0.22110
 228        4PX         0.00050   0.00013   0.00486   0.00024  -0.00063
 229        4PY        -0.00303  -0.00254   0.00021  -0.00801   0.00019
 230        4PZ        -0.00304  -0.00304   0.00027  -0.00444   0.00030
 231        5PX         0.00118   0.00017   0.01356  -0.00032  -0.00551
 232        5PY        -0.00697   0.00224   0.00107   0.06377  -0.01418
 233        5PZ        -0.00561  -0.00122   0.00049   0.03816   0.01141
 234        6D 0        0.00051   0.00047  -0.00003   0.00029  -0.00223
 235        6D+1       -0.00016  -0.00003  -0.00158  -0.00015  -0.00008
 236        6D-1        0.00174   0.00107  -0.00014  -0.00276  -0.00001
 237        6D+2       -0.00053   0.00031   0.00007   0.00224  -0.00122
 238        6D-2       -0.00015  -0.00003  -0.00167   0.00003   0.00059
 239 12  H  1S         -0.08299   0.00000  -0.00224  -0.01166   0.00000
 240        2S         -0.13635   0.00000  -0.00702  -0.03631   0.00000
 241        3S         -0.09681   0.00000   0.02015  -0.64689   0.00000
 242        4PX        -0.00311   0.00000   0.00007   0.00587   0.00000
 243        4PY        -0.00199   0.00000  -0.00021   0.00305   0.00000
 244        4PZ         0.00000   0.00123   0.00000   0.00000   0.00677
 245        5PX        -0.00446   0.00000   0.00128  -0.00575   0.00000
 246        5PY         0.00148   0.00000   0.00031  -0.03945   0.00000
 247        5PZ         0.00000   0.00604   0.00000   0.00000   0.01267
 248        6D 0        0.00060   0.00000  -0.00016   0.00062   0.00000
 249        6D+1        0.00000   0.00059   0.00000   0.00000   0.00180
 250        6D-1        0.00000   0.00125   0.00000   0.00000  -0.00018
 251        6D+2       -0.00106   0.00000   0.00056   0.00183   0.00000
 252        6D-2       -0.00069   0.00000   0.00016   0.00062   0.00000
 253 13  H  1S         -0.07357   0.00000   0.01780  -0.01084   0.00000
 254        2S         -0.12186   0.00000   0.03232  -0.05204   0.00000
 255        3S         -0.08614   0.00000   0.01475  -0.75641   0.00000
 256        4PX         0.00332   0.00000  -0.00038  -0.00655   0.00000
 257        4PY        -0.00020   0.00000   0.00037   0.00062   0.00000
 258        4PZ         0.00000   0.00119   0.00000   0.00000   0.00772
 259        5PX         0.00334   0.00000  -0.00083   0.03084   0.00000
 260        5PY         0.00392   0.00000  -0.00054  -0.03626   0.00000
 261        5PZ         0.00000   0.00585   0.00000   0.00000   0.00618
 262        6D 0        0.00059   0.00000   0.00006   0.00098   0.00000
 263        6D+1        0.00000  -0.00109   0.00000   0.00000  -0.00168
 264        6D-1        0.00000   0.00083   0.00000   0.00000  -0.00127
 265        6D+2       -0.00120   0.00000  -0.00014   0.00050   0.00000
 266        6D-2       -0.00058   0.00000  -0.00022   0.00103   0.00000
                          26        27        28        29        30
                           V         V         V         V         V
     Eigenvalues --     0.16782   0.16972   0.18358   0.18875   0.20112
   1 1   C  1S          0.00086  -0.01375  -0.00939  -0.02799   0.02379
   2        2S         -0.00515   0.07674   0.03423   0.10495  -0.04634
   3        3S         -0.00248   0.02141   0.00735   0.01924   0.00374
   4        4S         -0.04304   0.99894   0.52919   1.42651  -1.46594
   5        5PX         0.18401  -0.00506   0.01094   0.03678  -0.00285
   6        5PY        -0.00454   0.06050   0.01288   0.03344  -0.00534
   7        5PZ        -0.00222   0.03358   0.01650   0.03123  -0.04085
   8        6PX         0.22760  -0.00717   0.00941   0.04004  -0.00616
   9        6PY        -0.02494   0.11413   0.03445   0.12690  -0.07224
  10        6PZ        -0.02247   0.05539   0.03345   0.10810  -0.15264
  11        7PX         0.77188  -0.11286   0.24861   0.14455   0.04618
  12        7PY        -0.23254   0.81892   0.25785   1.52237   0.02171
  13        7PZ         0.00026   0.57237   0.29823   0.04586  -0.44212
  14        8D 0       -0.00023   0.00058  -0.00032  -0.00086   0.00475
  15        8D+1        0.01509   0.00131  -0.00376   0.00220  -0.00135
  16        8D-1       -0.00110  -0.00167   0.00162   0.00961  -0.00417
  17        8D+2        0.00114  -0.00078  -0.00147  -0.00145  -0.00087
  18        8D-2        0.00078  -0.00432   0.00960  -0.00009   0.00154
  19        9D 0        0.00905   0.00025   0.00568   0.00167  -0.00826
  20        9D+1        0.01115  -0.00608   0.02725   0.00905   0.00953
  21        9D-1       -0.00875   0.03970   0.01483  -0.01959  -0.04264
  22        9D+2        0.01218  -0.00172  -0.01183  -0.07751   0.08743
  23        9D-2       -0.01916   0.01601  -0.01465  -0.00301   0.00477
  24       10F 0       -0.00010   0.00170  -0.00005  -0.00254   0.00937
  25       10F+1        0.00078  -0.00077   0.00275  -0.00111   0.00087
  26       10F-1       -0.00005   0.00308   0.00026   0.00008  -0.00136
  27       10F+2        0.00092  -0.00319  -0.00229  -0.00513   0.01271
  28       10F-2       -0.00242   0.00172  -0.00476  -0.00006  -0.00004
  29       10F+3       -0.00365   0.00054   0.00161  -0.00075   0.00058
  30       10F-3        0.00046  -0.00668  -0.00113  -0.00619   0.00201
  31 2   C  1S         -0.00086  -0.01375  -0.00939   0.02799   0.02379
  32        2S          0.00515   0.07674   0.03423  -0.10495  -0.04634
  33        3S          0.00248   0.02141   0.00735  -0.01924   0.00374
  34        4S          0.04304   0.99894   0.52919  -1.42651  -1.46594
  35        5PX        -0.18401  -0.00506   0.01094  -0.03678  -0.00285
  36        5PY         0.00454   0.06050   0.01288  -0.03344  -0.00534
  37        5PZ        -0.00222  -0.03358  -0.01650   0.03123   0.04085
  38        6PX        -0.22760  -0.00717   0.00941  -0.04004  -0.00616
  39        6PY         0.02494   0.11413   0.03445  -0.12690  -0.07224
  40        6PZ        -0.02247  -0.05539  -0.03345   0.10810   0.15264
  41        7PX        -0.77188  -0.11286   0.24861  -0.14455   0.04618
  42        7PY         0.23254   0.81892   0.25785  -1.52237   0.02171
  43        7PZ         0.00026  -0.57237  -0.29823   0.04586   0.44212
  44        8D 0        0.00023   0.00058  -0.00032   0.00086   0.00475
  45        8D+1        0.01509  -0.00131   0.00376   0.00220   0.00135
  46        8D-1       -0.00110   0.00167  -0.00162   0.00961   0.00417
  47        8D+2       -0.00114  -0.00078  -0.00147   0.00145  -0.00087
  48        8D-2       -0.00078  -0.00432   0.00960   0.00009   0.00154
  49        9D 0       -0.00905   0.00025   0.00568  -0.00167  -0.00826
  50        9D+1        0.01115   0.00608  -0.02725   0.00905  -0.00953
  51        9D-1       -0.00875  -0.03970  -0.01483  -0.01959   0.04264
  52        9D+2       -0.01218  -0.00172  -0.01183   0.07751   0.08743
  53        9D-2        0.01916   0.01601  -0.01465   0.00301   0.00477
  54       10F 0       -0.00010  -0.00170   0.00005  -0.00254  -0.00937
  55       10F+1       -0.00078  -0.00077   0.00275   0.00111   0.00087
  56       10F-1        0.00005   0.00308   0.00026  -0.00008  -0.00136
  57       10F+2        0.00092   0.00319   0.00229  -0.00513  -0.01271
  58       10F-2       -0.00242  -0.00172   0.00476  -0.00006   0.00004
  59       10F+3        0.00365   0.00054   0.00161   0.00075   0.00058
  60       10F-3       -0.00046  -0.00668  -0.00113   0.00619   0.00201
  61 3   C  1S         -0.01027   0.00903   0.00775   0.00263  -0.02368
  62        2S          0.03603  -0.00185  -0.02758  -0.02751   0.08126
  63        3S          0.00412   0.01041  -0.00424  -0.00366   0.01440
  64        4S          0.78563  -0.84800  -0.34081  -1.40613   1.06478
  65        5PX        -0.00951   0.01926  -0.04939   0.00001  -0.02347
  66        5PY        -0.00398   0.00848  -0.00331  -0.01065   0.01611
  67        5PZ        -0.01256  -0.01856   0.01501   0.06479  -0.04565
  68        6PX        -0.04889   0.06362  -0.21958   0.00349  -0.08450
  69        6PY        -0.01602   0.07189  -0.00827   0.00554   0.06738
  70        6PZ        -0.06000  -0.03702   0.04737   0.22915  -0.09452
  71        7PX        -0.11844   0.36473  -1.21751   0.01143  -0.41778
  72        7PY        -0.01567   0.20186  -0.14652  -0.26129   0.51846
  73        7PZ        -0.13674  -0.31524   0.40668   0.58254  -0.78302
  74        8D 0        0.00144  -0.00308  -0.00256   0.00256   0.00468
  75        8D+1       -0.00939  -0.00132  -0.00236  -0.00097  -0.00096
  76        8D-1       -0.00033  -0.00445  -0.00039   0.00078  -0.00357
  77        8D+2        0.00048  -0.00236  -0.00285   0.00115   0.00697
  78        8D-2       -0.01309  -0.00036   0.00355  -0.00265   0.00128
  79        9D 0        0.00179  -0.01287  -0.01906  -0.01384  -0.00238
  80        9D+1        0.00442  -0.03176   0.06482   0.01491   0.01977
  81        9D-1        0.00007   0.03754   0.00193  -0.03850   0.05141
  82        9D+2        0.02565   0.00365   0.00420  -0.08919   0.00967
  83        9D-2        0.00668   0.00683   0.01755  -0.01128   0.01393
  84       10F 0        0.00155  -0.00418  -0.00008  -0.00226  -0.00262
  85       10F+1        0.00148  -0.00083  -0.00318  -0.00294  -0.00033
  86       10F-1       -0.00069   0.00030   0.00058  -0.00092  -0.00039
  87       10F+2       -0.00529   0.00469   0.00193   0.01022  -0.00586
  88       10F-2       -0.00449   0.00229  -0.00011   0.00083  -0.00030
  89       10F+3        0.00203   0.00206  -0.00295   0.00195  -0.00076
  90       10F-3       -0.00133   0.00019   0.00015  -0.00006  -0.00508
  91 4   C  1S          0.01027   0.00903   0.00775  -0.00263  -0.02368
  92        2S         -0.03603  -0.00185  -0.02758   0.02751   0.08126
  93        3S         -0.00412   0.01041  -0.00424   0.00366   0.01440
  94        4S         -0.78563  -0.84800  -0.34081   1.40613   1.06478
  95        5PX         0.00951   0.01926  -0.04939  -0.00001  -0.02347
  96        5PY         0.00398   0.00848  -0.00331   0.01065   0.01611
  97        5PZ        -0.01256   0.01856  -0.01501   0.06479   0.04565
  98        6PX         0.04889   0.06362  -0.21958  -0.00349  -0.08450
  99        6PY         0.01602   0.07189  -0.00827  -0.00554   0.06738
 100        6PZ        -0.06000   0.03702  -0.04737   0.22915   0.09452
 101        7PX         0.11844   0.36473  -1.21751  -0.01143  -0.41778
 102        7PY         0.01567   0.20186  -0.14652   0.26129   0.51846
 103        7PZ        -0.13674   0.31524  -0.40668   0.58254   0.78302
 104        8D 0       -0.00144  -0.00308  -0.00256  -0.00256   0.00468
 105        8D+1       -0.00939   0.00132   0.00236  -0.00097   0.00096
 106        8D-1       -0.00033   0.00445   0.00039   0.00078   0.00357
 107        8D+2       -0.00048  -0.00236  -0.00285  -0.00115   0.00697
 108        8D-2        0.01309  -0.00036   0.00355   0.00265   0.00128
 109        9D 0       -0.00179  -0.01287  -0.01906   0.01384  -0.00238
 110        9D+1        0.00442   0.03176  -0.06482   0.01491  -0.01977
 111        9D-1        0.00007  -0.03754  -0.00193  -0.03850  -0.05141
 112        9D+2       -0.02565   0.00365   0.00420   0.08919   0.00967
 113        9D-2       -0.00668   0.00683   0.01755   0.01128   0.01393
 114       10F 0        0.00155   0.00418   0.00008  -0.00226   0.00262
 115       10F+1       -0.00148  -0.00083  -0.00318   0.00294  -0.00033
 116       10F-1        0.00069   0.00030   0.00058   0.00092  -0.00039
 117       10F+2       -0.00529  -0.00469  -0.00193   0.01022   0.00586
 118       10F-2       -0.00449  -0.00229   0.00011   0.00083   0.00030
 119       10F+3       -0.00203   0.00206  -0.00295  -0.00195  -0.00076
 120       10F-3        0.00133   0.00019   0.00015   0.00006  -0.00508
 121 5   Si 1S          0.00000   0.00148  -0.00314   0.00000   0.00320
 122        2S          0.00000  -0.04408   0.00076   0.00000  -0.00706
 123        3S          0.00000  -0.08828  -0.05891   0.00000   0.03516
 124        4S          0.00000  -0.08499  -0.01812   0.00000  -0.04367
 125        5S          0.00000   1.21970  -0.19154   0.00000   0.98525
 126        6PX         0.00000  -0.00164   0.08034   0.00000   0.02086
 127        6PY         0.00000  -0.02386   0.00733   0.00000  -0.00976
 128        6PZ         0.01095   0.00000   0.00000  -0.01975   0.00000
 129        7PX         0.00000   0.00853  -0.28679   0.00000  -0.06084
 130        7PY         0.00000   0.04732  -0.05602   0.00000  -0.05250
 131        7PZ        -0.00989   0.00000   0.00000   0.01213   0.00000
 132        8PX         0.00000   0.00256  -0.02334   0.00000  -0.00571
 133        8PY         0.00000   0.00055  -0.00069   0.00000   0.00295
 134        8PZ        -0.00628   0.00000   0.00000   0.00836   0.00000
 135        9PX         0.00000  -0.59165  -0.68744   0.00000  -0.41101
 136        9PY         0.00000   2.24312  -0.16604   0.00000   1.92361
 137        9PZ         0.04358   0.00000   0.00000   0.94230   0.00000
 138       10D 0        0.00000   0.08685   0.02124   0.00000   0.03239
 139       10D+1       -0.07103   0.00000   0.00000  -0.04424   0.00000
 140       10D-1        0.02655   0.00000   0.00000   0.10775   0.00000
 141       10D+2        0.00000  -0.27675  -0.10318   0.00000  -0.16994
 142       10D-2        0.00000  -0.13538   0.24454   0.00000  -0.05451
 143       11D 0        0.00000  -0.01640  -0.00519   0.00000  -0.04494
 144       11D+1       -0.00158   0.00000   0.00000   0.00470   0.00000
 145       11D-1       -0.00077   0.00000   0.00000  -0.05353   0.00000
 146       11D+2        0.00000   0.07399   0.02417   0.00000   0.05341
 147       11D-2        0.00000   0.03937  -0.05263   0.00000   0.01632
 148       12F 0       -0.00625   0.00000   0.00000   0.00511   0.00000
 149       12F+1        0.00000  -0.01108   0.03595   0.00000  -0.00065
 150       12F-1        0.00000   0.03564   0.01537   0.00000   0.02086
 151       12F+2       -0.00152   0.00000   0.00000  -0.01752   0.00000
 152       12F-2        0.00173   0.00000   0.00000  -0.01077   0.00000
 153       12F+3        0.00000   0.00613   0.01647   0.00000   0.00799
 154       12F-3        0.00000  -0.01447   0.00184   0.00000  -0.01867
 155 6   H  1S         -0.03275   0.00024   0.01208  -0.00485   0.01461
 156        2S         -0.01209   0.00779   0.29160  -0.19300   0.02811
 157        3S         -0.00591  -0.53092   1.59992  -1.05837  -0.66447
 158        4PX         0.00239  -0.00178   0.00406  -0.00735  -0.01016
 159        4PY         0.00078   0.00183  -0.00054  -0.00058   0.00241
 160        4PZ        -0.00033  -0.00573   0.01001  -0.00382  -0.00175
 161        5PX        -0.02291   0.01115  -0.08664   0.10180   0.05862
 162        5PY         0.02136  -0.00161   0.01127   0.00190   0.00787
 163        5PZ        -0.01697   0.02766  -0.11797   0.08360   0.00204
 164        6D 0        0.00064  -0.00046   0.00287  -0.00246   0.00120
 165        6D+1        0.00086  -0.00106   0.00869  -0.00672  -0.00091
 166        6D-1       -0.00223   0.00048  -0.00067  -0.00082  -0.00079
 167        6D+2        0.00124   0.00031   0.00322  -0.00538  -0.00176
 168        6D-2       -0.00088  -0.00066  -0.00046  -0.00016  -0.00127
 169 7   H  1S          0.03550  -0.00339  -0.01820   0.00804   0.00295
 170        2S          0.19447   0.14935  -0.23212  -0.15098  -0.08853
 171        3S          0.70446   0.19443  -1.12194  -0.67223  -1.42234
 172        4PX        -0.00305   0.00011   0.00145   0.00623   0.01237
 173        4PY        -0.00161   0.00007   0.00030  -0.00026   0.00484
 174        4PZ         0.00156   0.00033  -0.00893   0.00121  -0.00437
 175        5PX         0.06822   0.03707  -0.06983  -0.09825  -0.11077
 176        5PY        -0.00875   0.01391  -0.02313  -0.01821  -0.01773
 177        5PZ        -0.02723  -0.02894   0.08073   0.03463   0.03227
 178        6D 0       -0.00120  -0.00090   0.00092   0.00061   0.00196
 179        6D+1       -0.00363  -0.00288   0.00639   0.00393   0.00348
 180        6D-1        0.00091  -0.00042   0.00191   0.00040   0.00051
 181        6D+2        0.00432   0.00241  -0.00326  -0.00555  -0.00484
 182        6D-2       -0.00016   0.00129  -0.00191  -0.00178  -0.00028
 183 8   H  1S         -0.03550  -0.00339  -0.01820  -0.00804   0.00295
 184        2S         -0.19447   0.14935  -0.23212   0.15098  -0.08853
 185        3S         -0.70446   0.19443  -1.12194   0.67223  -1.42234
 186        4PX         0.00305   0.00011   0.00145  -0.00623   0.01237
 187        4PY         0.00161   0.00007   0.00030   0.00026   0.00484
 188        4PZ         0.00156  -0.00033   0.00893   0.00121   0.00437
 189        5PX        -0.06822   0.03707  -0.06983   0.09825  -0.11077
 190        5PY         0.00875   0.01391  -0.02313   0.01821  -0.01773
 191        5PZ        -0.02723   0.02894  -0.08073   0.03463  -0.03227
 192        6D 0        0.00120  -0.00090   0.00092  -0.00061   0.00196
 193        6D+1       -0.00363   0.00288  -0.00639   0.00393  -0.00348
 194        6D-1        0.00091   0.00042  -0.00191   0.00040  -0.00051
 195        6D+2       -0.00432   0.00241  -0.00326   0.00555  -0.00484
 196        6D-2        0.00016   0.00129  -0.00191   0.00178  -0.00028
 197 9   H  1S          0.03275   0.00024   0.01208   0.00485   0.01461
 198        2S          0.01209   0.00779   0.29160   0.19300   0.02811
 199        3S          0.00591  -0.53092   1.59992   1.05837  -0.66447
 200        4PX        -0.00239  -0.00178   0.00406   0.00735  -0.01016
 201        4PY        -0.00078   0.00183  -0.00054   0.00058   0.00241
 202        4PZ        -0.00033   0.00573  -0.01001  -0.00382   0.00175
 203        5PX         0.02291   0.01115  -0.08664  -0.10180   0.05862
 204        5PY        -0.02136  -0.00161   0.01127  -0.00190   0.00787
 205        5PZ        -0.01697  -0.02766   0.11797   0.08360  -0.00204
 206        6D 0       -0.00064  -0.00046   0.00287   0.00246   0.00120
 207        6D+1        0.00086   0.00106  -0.00869  -0.00672   0.00091
 208        6D-1       -0.00223  -0.00048   0.00067  -0.00082   0.00079
 209        6D+2       -0.00124   0.00031   0.00322   0.00538  -0.00176
 210        6D-2        0.00088  -0.00066  -0.00046   0.00016  -0.00127
 211 10  H  1S          0.00468  -0.00208   0.00357  -0.00998  -0.00355
 212        2S         -0.03858  -0.15555  -0.06283   0.25995   0.19868
 213        3S         -0.20445  -1.63658  -0.60825   1.90112   0.80047
 214        4PX        -0.00797  -0.00103   0.00286  -0.00171   0.00011
 215        4PY        -0.00119  -0.01450  -0.00546   0.01155   0.00494
 216        4PZ         0.00109   0.00702   0.00214  -0.00939  -0.00099
 217        5PX        -0.02550  -0.00326   0.00395  -0.00073   0.00128
 218        5PY         0.01993   0.10938   0.04561  -0.12621  -0.11391
 219        5PZ        -0.01692  -0.05161  -0.02409   0.11378   0.07205
 220        6D 0        0.00017   0.00133   0.00042   0.00158  -0.00033
 221        6D+1       -0.00158  -0.00089   0.00151  -0.00003   0.00017
 222        6D-1        0.00151   0.00314   0.00191  -0.00874  -0.00718
 223        6D+2        0.00087   0.00443   0.00185  -0.00607  -0.00663
 224        6D-2        0.00407   0.00086  -0.00123   0.00024  -0.00011
 225 11  H  1S         -0.00468  -0.00208   0.00357   0.00998  -0.00355
 226        2S          0.03858  -0.15555  -0.06283  -0.25995   0.19868
 227        3S          0.20445  -1.63658  -0.60825  -1.90112   0.80047
 228        4PX         0.00797  -0.00103   0.00286   0.00171   0.00011
 229        4PY         0.00119  -0.01450  -0.00546  -0.01155   0.00494
 230        4PZ         0.00109  -0.00702  -0.00214  -0.00939   0.00099
 231        5PX         0.02550  -0.00326   0.00395   0.00073   0.00128
 232        5PY        -0.01993   0.10938   0.04561   0.12621  -0.11391
 233        5PZ        -0.01692   0.05161   0.02409   0.11378  -0.07205
 234        6D 0       -0.00017   0.00133   0.00042  -0.00158  -0.00033
 235        6D+1       -0.00158   0.00089  -0.00151  -0.00003  -0.00017
 236        6D-1        0.00151  -0.00314  -0.00191  -0.00874   0.00718
 237        6D+2       -0.00087   0.00443   0.00185   0.00607  -0.00663
 238        6D-2       -0.00407   0.00086  -0.00123  -0.00024  -0.00011
 239 12  H  1S          0.00000   0.01306  -0.02157   0.00000   0.02975
 240        2S          0.00000   0.05056  -0.13216   0.00000   0.14965
 241        3S          0.00000   0.63283  -0.77878   0.00000   0.46842
 242        4PX         0.00000  -0.00369   0.00504   0.00000  -0.00243
 243        4PY         0.00000  -0.00027   0.00552   0.00000   0.00221
 244        4PZ         0.00066   0.00000   0.00000   0.00273   0.00000
 245        5PX         0.00000  -0.02332  -0.06483   0.00000  -0.01172
 246        5PY         0.00000   0.02598  -0.03540   0.00000   0.00716
 247        5PZ        -0.00230   0.00000   0.00000   0.01432   0.00000
 248        6D 0        0.00000   0.00122   0.00023   0.00000   0.00078
 249        6D+1       -0.00061   0.00000   0.00000   0.00175   0.00000
 250        6D-1       -0.00097   0.00000   0.00000   0.00120   0.00000
 251        6D+2        0.00000  -0.00222  -0.00103   0.00000  -0.00059
 252        6D-2        0.00000  -0.00209  -0.00265   0.00000  -0.00270
 253 13  H  1S          0.00000   0.01252   0.02434   0.00000   0.03433
 254        2S          0.00000   0.07962   0.04360   0.00000   0.12058
 255        3S          0.00000   0.59371   1.04506   0.00000   0.62591
 256        4PX         0.00000   0.00258   0.01072   0.00000   0.00414
 257        4PY         0.00000   0.00234  -0.00317   0.00000   0.00274
 258        4PZ        -0.00087   0.00000   0.00000   0.00307   0.00000
 259        5PX         0.00000   0.01066  -0.06835   0.00000  -0.00274
 260        5PY         0.00000   0.03309  -0.00520   0.00000   0.01162
 261        5PZ         0.00214   0.00000   0.00000   0.00366   0.00000
 262        6D 0        0.00000   0.00165   0.00006   0.00000   0.00079
 263        6D+1       -0.00021   0.00000   0.00000  -0.00219   0.00000
 264        6D-1        0.00008   0.00000   0.00000   0.00029   0.00000
 265        6D+2        0.00000  -0.00383   0.00204   0.00000  -0.00359
 266        6D-2        0.00000  -0.00097   0.00052   0.00000  -0.00028
                          31        32        33        34        35
                           V         V         V         V         V
     Eigenvalues --     0.21563   0.22010   0.22240   0.23248   0.31360
   1 1   C  1S         -0.00141  -0.00111   0.00443  -0.02653   0.02859
   2        2S          0.02457   0.00664   0.00470   0.11056  -0.07599
   3        3S          0.00717   0.00153  -0.00231   0.02543   0.00680
   4        4S         -0.09616  -0.15145   0.46440   0.21123  -1.99023
   5        5PX         0.00845  -0.03326  -0.03302  -0.01983   0.00919
   6        5PY        -0.01364   0.00410   0.01224   0.04243   0.07106
   7        5PZ        -0.00930  -0.00117   0.00448   0.00255  -0.02401
   8        6PX         0.02105  -0.02871  -0.04863  -0.02459   0.02130
   9        6PY        -0.05181  -0.01599   0.03205   0.10113   0.27669
  10        6PZ        -0.04899   0.03961   0.01450   0.08394  -0.11614
  11        7PX        -0.03286  -0.69490   0.17317  -0.06874   0.02012
  12        7PY        -0.13031   0.19946   0.16633   1.96386   1.24232
  13        7PZ         0.01179   0.10619   0.29185   0.81364  -0.69651
  14        8D 0        0.00762  -0.00078  -0.00059  -0.00940  -0.00059
  15        8D+1       -0.00053  -0.00243  -0.00542  -0.00064  -0.00010
  16        8D-1       -0.00093  -0.00044   0.00078   0.01043  -0.01130
  17        8D+2        0.00596   0.00068   0.00125  -0.00173  -0.00551
  18        8D-2       -0.00131  -0.00990   0.00603   0.00058   0.00205
  19        9D 0       -0.02414  -0.02892  -0.00875  -0.02639  -0.02960
  20        9D+1       -0.00238  -0.00864   0.03102  -0.01313  -0.00108
  21        9D-1       -0.01029  -0.00154   0.02553   0.00382   0.08557
  22        9D+2        0.01581  -0.00437  -0.01433  -0.04294   0.02975
  23        9D-2        0.01516   0.03523  -0.03726  -0.00097  -0.00524
  24       10F 0        0.00371   0.00167   0.00101   0.00234   0.00777
  25       10F+1       -0.00001  -0.00377   0.00098   0.00164   0.00080
  26       10F-1       -0.00074  -0.00082   0.00172   0.00467   0.00132
  27       10F+2        0.00225   0.00010  -0.00240  -0.00092   0.00811
  28       10F-2        0.00088   0.00101  -0.00195   0.00014  -0.00100
  29       10F+3        0.00061  -0.00169   0.00037   0.00144  -0.00029
  30       10F-3        0.00024  -0.00162  -0.00209  -0.00775  -0.00489
  31 2   C  1S         -0.00141   0.00111   0.00443   0.02653   0.02859
  32        2S          0.02457  -0.00664   0.00470  -0.11056  -0.07599
  33        3S          0.00717  -0.00153  -0.00231  -0.02543   0.00680
  34        4S         -0.09616   0.15145   0.46440  -0.21123  -1.99023
  35        5PX         0.00845   0.03326  -0.03302   0.01983   0.00919
  36        5PY        -0.01364  -0.00410   0.01224  -0.04243   0.07106
  37        5PZ         0.00930  -0.00117  -0.00448   0.00255   0.02401
  38        6PX         0.02105   0.02871  -0.04863   0.02459   0.02130
  39        6PY        -0.05181   0.01599   0.03205  -0.10113   0.27669
  40        6PZ         0.04899   0.03961  -0.01450   0.08394   0.11614
  41        7PX        -0.03286   0.69490   0.17317   0.06874   0.02012
  42        7PY        -0.13031  -0.19946   0.16633  -1.96386   1.24232
  43        7PZ        -0.01179   0.10619  -0.29185   0.81364   0.69651
  44        8D 0        0.00762   0.00078  -0.00059   0.00940  -0.00059
  45        8D+1        0.00053  -0.00243   0.00542  -0.00064   0.00010
  46        8D-1        0.00093  -0.00044  -0.00078   0.01043   0.01130
  47        8D+2        0.00596  -0.00068   0.00125   0.00173  -0.00551
  48        8D-2       -0.00131   0.00990   0.00603  -0.00058   0.00205
  49        9D 0       -0.02414   0.02892  -0.00875   0.02639  -0.02960
  50        9D+1        0.00238  -0.00864  -0.03102  -0.01313   0.00108
  51        9D-1        0.01029  -0.00154  -0.02553   0.00382  -0.08557
  52        9D+2        0.01581   0.00437  -0.01433   0.04294   0.02975
  53        9D-2        0.01516  -0.03523  -0.03726   0.00097  -0.00524
  54       10F 0       -0.00371   0.00167  -0.00101   0.00234  -0.00777
  55       10F+1       -0.00001   0.00377   0.00098  -0.00164   0.00080
  56       10F-1       -0.00074   0.00082   0.00172  -0.00467   0.00132
  57       10F+2       -0.00225   0.00010   0.00240  -0.00092  -0.00811
  58       10F-2       -0.00088   0.00101   0.00195   0.00014   0.00100
  59       10F+3        0.00061   0.00169   0.00037  -0.00144  -0.00029
  60       10F-3        0.00024   0.00162  -0.00209   0.00775  -0.00489
  61 3   C  1S          0.03228  -0.00669   0.01132  -0.01743  -0.01377
  62        2S         -0.07057   0.01977  -0.02040   0.07266  -0.00392
  63        3S         -0.00564   0.00410   0.00100   0.01968  -0.03768
  64        4S         -1.44509   0.11177  -0.72150   0.07303   2.70651
  65        5PX        -0.00207  -0.08745  -0.05494   0.00431  -0.00200
  66        5PY         0.03340  -0.00430  -0.00395   0.03793   0.05324
  67        5PZ        -0.03110   0.00158   0.00473  -0.05159   0.02179
  68        6PX         0.01779  -0.36822  -0.24002   0.03395  -0.01057
  69        6PY         0.04999  -0.02207  -0.00333   0.02577   0.08163
  70        6PZ         0.03981   0.00603   0.06962  -0.12395   0.04972
  71        7PX         0.05128  -1.92692  -1.50500   0.10045   0.03986
  72        7PY         0.42227  -0.08326  -0.17574   0.17503   1.47496
  73        7PZ        -0.57194   0.09082   0.07762  -1.22760   1.47994
  74        8D 0        0.00338  -0.00196  -0.00191   0.00273   0.00887
  75        8D+1       -0.00004   0.00815   0.01505   0.00127  -0.00400
  76        8D-1       -0.00610   0.00033  -0.00085  -0.00061  -0.01421
  77        8D+2       -0.00610   0.00258   0.00061  -0.00130   0.01924
  78        8D-2       -0.00103   0.00416  -0.00551   0.00095   0.00284
  79        9D 0       -0.04175  -0.04397  -0.04875  -0.00684  -0.00699
  80        9D+1       -0.01379   0.17268   0.15892  -0.02355   0.02038
  81        9D-1        0.00987   0.02405   0.01328  -0.00399   0.04634
  82        9D+2       -0.05636   0.02097   0.01156   0.00300  -0.04902
  83        9D-2        0.00180   0.02973   0.00103  -0.00693  -0.01395
  84       10F 0       -0.00502   0.00081  -0.00078  -0.00152   0.00147
  85       10F+1       -0.00370  -0.00437  -0.00439   0.00037   0.00191
  86       10F-1        0.00080   0.00021   0.00018  -0.00191  -0.00343
  87       10F+2        0.00979  -0.00204   0.00671  -0.00228  -0.02160
  88       10F-2        0.00231  -0.00260  -0.00311   0.00024  -0.00294
  89       10F+3        0.00169  -0.00888  -0.00519  -0.00008  -0.00349
  90       10F-3       -0.00025  -0.00345  -0.00123  -0.00114  -0.00972
  91 4   C  1S          0.03228   0.00669   0.01132   0.01743  -0.01377
  92        2S         -0.07057  -0.01977  -0.02040  -0.07266  -0.00392
  93        3S         -0.00564  -0.00410   0.00100  -0.01968  -0.03768
  94        4S         -1.44509  -0.11177  -0.72150  -0.07303   2.70651
  95        5PX        -0.00207   0.08745  -0.05494  -0.00431  -0.00200
  96        5PY         0.03340   0.00430  -0.00395  -0.03793   0.05324
  97        5PZ         0.03110   0.00158  -0.00473  -0.05159  -0.02179
  98        6PX         0.01779   0.36822  -0.24002  -0.03395  -0.01057
  99        6PY         0.04999   0.02207  -0.00333  -0.02577   0.08163
 100        6PZ        -0.03981   0.00603  -0.06962  -0.12395  -0.04972
 101        7PX         0.05128   1.92692  -1.50500  -0.10045   0.03986
 102        7PY         0.42227   0.08326  -0.17574  -0.17503   1.47496
 103        7PZ         0.57194   0.09082  -0.07762  -1.22760  -1.47994
 104        8D 0        0.00338   0.00196  -0.00191  -0.00273   0.00887
 105        8D+1        0.00004   0.00815  -0.01505   0.00127   0.00400
 106        8D-1        0.00610   0.00033   0.00085  -0.00061   0.01421
 107        8D+2       -0.00610  -0.00258   0.00061   0.00130   0.01924
 108        8D-2       -0.00103  -0.00416  -0.00551  -0.00095   0.00284
 109        9D 0       -0.04175   0.04397  -0.04875   0.00684  -0.00699
 110        9D+1        0.01379   0.17268  -0.15892  -0.02355  -0.02038
 111        9D-1       -0.00987   0.02405  -0.01328  -0.00399  -0.04634
 112        9D+2       -0.05636  -0.02097   0.01156  -0.00300  -0.04902
 113        9D-2        0.00180  -0.02973   0.00103   0.00693  -0.01395
 114       10F 0        0.00502   0.00081   0.00078  -0.00152  -0.00147
 115       10F+1       -0.00370   0.00437  -0.00439  -0.00037   0.00191
 116       10F-1        0.00080  -0.00021   0.00018   0.00191  -0.00343
 117       10F+2       -0.00979  -0.00204  -0.00671  -0.00228   0.02160
 118       10F-2       -0.00231  -0.00260   0.00311   0.00024   0.00294
 119       10F+3        0.00169   0.00888  -0.00519   0.00008  -0.00349
 120       10F-3       -0.00025   0.00345  -0.00123   0.00114  -0.00972
 121 5   Si 1S          0.03708   0.00000   0.00618   0.00000   0.01702
 122        2S         -0.11060   0.00000  -0.01901   0.00000   0.00227
 123        3S          0.43083   0.00000   0.06857   0.00000   0.34596
 124        4S         -0.04926   0.00000  -0.02652   0.00000   0.11891
 125        5S          4.19647   0.00000   0.79812   0.00000  -1.26436
 126        6PX         0.00283   0.00000  -0.05455   0.00000  -0.00318
 127        6PY         0.05866   0.00000  -0.01369   0.00000  -0.04863
 128        6PZ         0.00000  -0.00564   0.00000   0.02770   0.00000
 129        7PX        -0.01314   0.00000   0.09417   0.00000   0.14744
 130        7PY        -0.20138   0.00000   0.02730   0.00000   0.13354
 131        7PZ         0.00000   0.01299   0.00000  -0.14052   0.00000
 132        8PX         0.00098   0.00000   0.02277   0.00000  -0.00898
 133        8PY        -0.02417   0.00000   0.00431   0.00000   0.02539
 134        8PZ         0.00000   0.00298   0.00000  -0.00518   0.00000
 135        9PX        -0.47118   0.00000   2.63898   0.00000   0.55566
 136        9PY         0.22006   0.00000   0.96856   0.00000  -1.90548
 137        9PZ         0.00000  -0.29622   0.00000  -1.10931   0.00000
 138       10D 0       -0.06397   0.00000   0.00873   0.00000  -0.24275
 139       10D+1        0.00000  -0.19707   0.00000   0.06755   0.00000
 140       10D-1        0.00000  -0.10239   0.00000  -0.08580   0.00000
 141       10D+2       -0.13990   0.00000  -0.06700   0.00000   0.29520
 142       10D-2       -0.03106   0.00000   0.10228   0.00000  -0.11828
 143       11D 0       -0.00458   0.00000  -0.00346   0.00000  -0.06210
 144       11D+1        0.00000   0.03017   0.00000  -0.00997   0.00000
 145       11D-1        0.00000   0.01675   0.00000   0.04542   0.00000
 146       11D+2        0.02877   0.00000  -0.01887   0.00000  -0.05176
 147       11D-2        0.00225   0.00000   0.04789   0.00000  -0.05033
 148       12F 0        0.00000  -0.00383   0.00000   0.01065   0.00000
 149       12F+1        0.00587   0.00000   0.00850   0.00000  -0.00832
 150       12F-1        0.00418   0.00000   0.00854   0.00000  -0.04437
 151       12F+2        0.00000   0.00754   0.00000  -0.00080   0.00000
 152       12F-2        0.00000  -0.00639   0.00000   0.00485   0.00000
 153       12F+3        0.01026   0.00000   0.01407   0.00000  -0.01705
 154       12F-3       -0.01255   0.00000  -0.00263   0.00000   0.01790
 155 6   H  1S          0.00119   0.01234  -0.03494   0.01186   0.03371
 156        2S          0.11410  -0.32010   0.31346   0.09848  -0.00156
 157        3S         -0.05263  -1.66037   1.12617   1.49394   0.64429
 158        4PX        -0.00186  -0.00155   0.00144   0.01105   0.00729
 159        4PY         0.00287   0.00102  -0.00435  -0.00222   0.00982
 160        4PZ         0.00085  -0.01229   0.00806   0.00519  -0.00232
 161        5PX        -0.04507   0.09732  -0.09985  -0.07855  -0.00703
 162        5PY         0.00152  -0.01854   0.02818   0.00255  -0.01252
 163        5PZ        -0.03217   0.15839  -0.14883  -0.04889   0.06624
 164        6D 0        0.00027  -0.00357   0.00311   0.00085  -0.00229
 165        6D+1        0.00396  -0.01001   0.00982   0.00455  -0.00497
 166        6D-1       -0.00089   0.00090  -0.00099   0.00011  -0.00094
 167        6D+2        0.00405  -0.00358   0.00455   0.00274   0.00018
 168        6D-2       -0.00121   0.00139  -0.00089   0.00066  -0.00264
 169 7   H  1S         -0.01087  -0.01358   0.03566   0.00451   0.01682
 170        2S          0.14398   0.34100  -0.18470   0.01334  -0.14000
 171        3S          0.04017   2.14766  -0.87620   0.81837   0.68067
 172        4PX         0.00093  -0.00822   0.00308  -0.00874  -0.01026
 173        4PY         0.00172  -0.00207   0.00413  -0.00403   0.00911
 174        4PZ         0.00177   0.01394  -0.00598  -0.00166  -0.00135
 175        5PX         0.05817   0.17318  -0.07359   0.04265  -0.02363
 176        5PY         0.01903   0.03860  -0.01897   0.02075  -0.03180
 177        5PZ        -0.03346  -0.14872   0.08728   0.00753   0.04653
 178        6D 0       -0.00130  -0.00199   0.00029  -0.00073   0.00340
 179        6D+1       -0.00270  -0.01170   0.00510  -0.00072   0.00563
 180        6D-1       -0.00149  -0.00210   0.00127  -0.00124   0.00172
 181        6D+2        0.00473   0.00845  -0.00181   0.00152  -0.00228
 182        6D-2        0.00304   0.00297  -0.00049   0.00017   0.00089
 183 8   H  1S         -0.01087   0.01358   0.03566  -0.00451   0.01682
 184        2S          0.14398  -0.34100  -0.18470  -0.01334  -0.14000
 185        3S          0.04017  -2.14766  -0.87620  -0.81837   0.68067
 186        4PX         0.00093   0.00822   0.00308   0.00874  -0.01026
 187        4PY         0.00172   0.00207   0.00413   0.00403   0.00911
 188        4PZ        -0.00177   0.01394   0.00598  -0.00166   0.00135
 189        5PX         0.05817  -0.17318  -0.07359  -0.04265  -0.02363
 190        5PY         0.01903  -0.03860  -0.01897  -0.02075  -0.03180
 191        5PZ         0.03346  -0.14872  -0.08728   0.00753  -0.04653
 192        6D 0       -0.00130   0.00199   0.00029   0.00073   0.00340
 193        6D+1        0.00270  -0.01170  -0.00510  -0.00072  -0.00563
 194        6D-1        0.00149  -0.00210  -0.00127  -0.00124  -0.00172
 195        6D+2        0.00473  -0.00845  -0.00181  -0.00152  -0.00228
 196        6D-2        0.00304  -0.00297  -0.00049  -0.00017   0.00089
 197 9   H  1S          0.00119  -0.01234  -0.03494  -0.01186   0.03371
 198        2S          0.11410   0.32010   0.31346  -0.09848  -0.00156
 199        3S         -0.05263   1.66037   1.12617  -1.49394   0.64429
 200        4PX        -0.00186   0.00155   0.00144  -0.01105   0.00729
 201        4PY         0.00287  -0.00102  -0.00435   0.00222   0.00982
 202        4PZ        -0.00085  -0.01229  -0.00806   0.00519   0.00232
 203        5PX        -0.04507  -0.09732  -0.09985   0.07855  -0.00703
 204        5PY         0.00152   0.01854   0.02818  -0.00255  -0.01252
 205        5PZ         0.03217   0.15839   0.14883  -0.04889  -0.06624
 206        6D 0        0.00027   0.00357   0.00311  -0.00085  -0.00229
 207        6D+1       -0.00396  -0.01001  -0.00982   0.00455   0.00497
 208        6D-1        0.00089   0.00090   0.00099   0.00011   0.00094
 209        6D+2        0.00405   0.00358   0.00455  -0.00274   0.00018
 210        6D-2       -0.00121  -0.00139  -0.00089  -0.00066  -0.00264
 211 10  H  1S         -0.01239   0.00081   0.00237  -0.01456  -0.00841
 212        2S          0.00297   0.01968  -0.11859   0.22452  -0.00670
 213        3S          0.16227   0.17640  -0.35834   2.24656  -0.66349
 214        4PX        -0.00068   0.00618   0.00234   0.00012  -0.00045
 215        4PY         0.00071   0.00052  -0.00168   0.01091   0.00034
 216        4PZ        -0.00215  -0.00052  -0.00013  -0.00948   0.01050
 217        5PX         0.00263  -0.00253  -0.01660   0.00279   0.00949
 218        5PY        -0.04028   0.00141   0.03878  -0.10443   0.02650
 219        5PZ         0.01039   0.00641  -0.01585   0.07732  -0.04825
 220        6D 0       -0.00141   0.00036   0.00059  -0.00002  -0.00014
 221        6D+1       -0.00042   0.00200   0.00094   0.00016   0.00047
 222        6D-1       -0.00172  -0.00013   0.00131  -0.00533   0.00343
 223        6D+2       -0.00330   0.00067   0.00146  -0.00447   0.00056
 224        6D-2        0.00043  -0.00237   0.00027   0.00009  -0.00036
 225 11  H  1S         -0.01239  -0.00081   0.00237   0.01456  -0.00841
 226        2S          0.00297  -0.01968  -0.11859  -0.22452  -0.00670
 227        3S          0.16227  -0.17640  -0.35834  -2.24656  -0.66349
 228        4PX        -0.00068  -0.00618   0.00234  -0.00012  -0.00045
 229        4PY         0.00071  -0.00052  -0.00168  -0.01091   0.00034
 230        4PZ         0.00215  -0.00052   0.00013  -0.00948  -0.01050
 231        5PX         0.00263   0.00253  -0.01660  -0.00279   0.00949
 232        5PY        -0.04028  -0.00141   0.03878   0.10443   0.02650
 233        5PZ        -0.01039   0.00641   0.01585   0.07732   0.04825
 234        6D 0       -0.00141  -0.00036   0.00059   0.00002  -0.00014
 235        6D+1        0.00042   0.00200  -0.00094   0.00016  -0.00047
 236        6D-1        0.00172  -0.00013  -0.00131  -0.00533  -0.00343
 237        6D+2       -0.00330  -0.00067   0.00146   0.00447   0.00056
 238        6D-2        0.00043   0.00237   0.00027  -0.00009  -0.00036
 239 12  H  1S         -0.04364   0.00000   0.04130   0.00000  -0.00050
 240        2S          0.10409   0.00000   0.06296   0.00000   0.04432
 241        3S         -2.18338   0.00000   1.54654   0.00000  -0.15669
 242        4PX         0.01398   0.00000   0.00084   0.00000  -0.00140
 243        4PY         0.01674   0.00000  -0.00943   0.00000  -0.00144
 244        4PZ         0.00000   0.00191   0.00000  -0.00354   0.00000
 245        5PX        -0.06707   0.00000   0.00248   0.00000   0.06161
 246        5PY        -0.06709   0.00000   0.02711   0.00000   0.01378
 247        5PZ         0.00000  -0.01819   0.00000  -0.00468   0.00000
 248        6D 0        0.00302   0.00000   0.00136   0.00000  -0.00349
 249        6D+1        0.00000  -0.00048   0.00000  -0.00101   0.00000
 250        6D-1        0.00000  -0.00095   0.00000   0.00091   0.00000
 251        6D+2        0.00030   0.00000   0.00010   0.00000   0.00031
 252        6D-2       -0.00444   0.00000  -0.00204   0.00000   0.00363
 253 13  H  1S         -0.02788   0.00000  -0.04932   0.00000   0.01176
 254        2S          0.15279   0.00000  -0.07019   0.00000   0.04643
 255        3S         -1.51962   0.00000  -1.92007   0.00000  -1.01877
 256        4PX        -0.01641   0.00000  -0.00674   0.00000  -0.00888
 257        4PY         0.00558   0.00000   0.01202   0.00000   0.00110
 258        4PZ         0.00000  -0.00299   0.00000  -0.00307   0.00000
 259        5PX         0.06007   0.00000   0.04216   0.00000   0.03368
 260        5PY        -0.02195   0.00000  -0.03549   0.00000  -0.03452
 261        5PZ         0.00000   0.02021   0.00000   0.00193   0.00000
 262        6D 0        0.00278   0.00000  -0.00017   0.00000   0.00049
 263        6D+1        0.00000   0.00040   0.00000  -0.00002   0.00000
 264        6D-1        0.00000   0.00050   0.00000   0.00105   0.00000
 265        6D+2       -0.00282   0.00000   0.00026   0.00000  -0.00184
 266        6D-2        0.00227   0.00000   0.00037   0.00000   0.00284
                          36        37        38        39        40
                           V         V         V         V         V
     Eigenvalues --     0.32057   0.34447   0.35905   0.36832   0.40084
   1 1   C  1S         -0.01068  -0.03031   0.00399   0.00818  -0.02385
   2        2S          0.02440   0.07619  -0.00972  -0.09283   0.04902
   3        3S         -0.00246  -0.04100  -0.01309  -0.02591  -0.01508
   4        4S          0.54963   8.16715   2.63230  -0.82297   3.07752
   5        5PX         0.00459  -0.01009   0.01039   0.00229   0.02287
   6        5PY        -0.01463  -0.02220   0.00964  -0.01198  -0.01524
   7        5PZ         0.00279  -0.00091  -0.02087   0.03424   0.01672
   8        6PX        -0.00908  -0.02642   0.02961  -0.01176   0.06665
   9        6PY        -0.09399  -0.17720   0.16294   0.17858  -0.23219
  10        6PZ         0.01627  -0.30325  -0.32042   0.19827   0.15735
  11        7PX         0.02146   0.05988  -0.09629   0.01123  -0.02529
  12        7PY        -0.46599  -3.18505   0.39128   0.98866  -2.18271
  13        7PZ         0.16699  -3.16354  -2.62044  -0.41778  -0.09241
  14        8D 0        0.00215  -0.00557  -0.00317  -0.02673   0.00093
  15        8D+1        0.00086  -0.00275   0.00211  -0.00138   0.00399
  16        8D-1        0.00256  -0.00223   0.00572  -0.00254  -0.00897
  17        8D+2        0.00338   0.00183  -0.00407  -0.01465   0.00563
  18        8D-2        0.00251   0.00101  -0.00296   0.00004  -0.00048
  19        9D 0        0.00828   0.24616   0.19895   0.10911  -0.09348
  20        9D+1        0.00487   0.04350  -0.03269   0.01311  -0.06013
  21        9D-1       -0.03677  -0.18520   0.04347   0.08089  -0.06107
  22        9D+2       -0.02519  -0.13256   0.03612   0.11878  -0.14609
  23        9D-2        0.01839  -0.01250   0.01880   0.03348   0.00386
  24       10F 0       -0.00071  -0.02968  -0.02205  -0.01473   0.00157
  25       10F+1        0.00259  -0.00174  -0.00074   0.00241   0.00067
  26       10F-1       -0.00083  -0.00097   0.00383   0.00369  -0.00650
  27       10F+2       -0.00157  -0.00564   0.00141  -0.00133  -0.00314
  28       10F-2       -0.00114  -0.00234   0.00268   0.00073   0.00450
  29       10F+3        0.00054  -0.00147   0.00106   0.00355   0.00174
  30       10F-3        0.00390   0.01109  -0.00745  -0.01715   0.01097
  31 2   C  1S         -0.01068   0.03031  -0.00399   0.00818   0.02385
  32        2S          0.02440  -0.07619   0.00972  -0.09283  -0.04902
  33        3S         -0.00246   0.04100   0.01309  -0.02591   0.01508
  34        4S          0.54963  -8.16715  -2.63230  -0.82297  -3.07752
  35        5PX         0.00459   0.01009  -0.01039   0.00229  -0.02287
  36        5PY        -0.01463   0.02220  -0.00964  -0.01198   0.01524
  37        5PZ        -0.00279  -0.00091  -0.02087  -0.03424   0.01672
  38        6PX        -0.00908   0.02642  -0.02961  -0.01176  -0.06665
  39        6PY        -0.09399   0.17720  -0.16294   0.17858   0.23219
  40        6PZ        -0.01627  -0.30325  -0.32042  -0.19827   0.15735
  41        7PX         0.02146  -0.05988   0.09629   0.01123   0.02529
  42        7PY        -0.46599   3.18505  -0.39128   0.98866   2.18271
  43        7PZ        -0.16699  -3.16354  -2.62044   0.41778  -0.09241
  44        8D 0        0.00215   0.00557   0.00317  -0.02673  -0.00093
  45        8D+1       -0.00086  -0.00275   0.00211   0.00138   0.00399
  46        8D-1       -0.00256  -0.00223   0.00572   0.00254  -0.00897
  47        8D+2        0.00338  -0.00183   0.00407  -0.01465  -0.00563
  48        8D-2        0.00251  -0.00101   0.00296   0.00004   0.00048
  49        9D 0        0.00828  -0.24616  -0.19895   0.10911   0.09348
  50        9D+1       -0.00487   0.04350  -0.03269  -0.01311  -0.06013
  51        9D-1        0.03677  -0.18520   0.04347  -0.08089  -0.06107
  52        9D+2       -0.02519   0.13256  -0.03612   0.11878   0.14609
  53        9D-2        0.01839   0.01250  -0.01880   0.03348  -0.00386
  54       10F 0        0.00071  -0.02968  -0.02205   0.01473   0.00157
  55       10F+1        0.00259   0.00174   0.00074   0.00241  -0.00067
  56       10F-1       -0.00083   0.00097  -0.00383   0.00369   0.00650
  57       10F+2        0.00157  -0.00564   0.00141   0.00133  -0.00314
  58       10F-2        0.00114  -0.00234   0.00268  -0.00073   0.00450
  59       10F+3        0.00054   0.00147  -0.00106   0.00355  -0.00174
  60       10F-3        0.00390  -0.01109   0.00745  -0.01715  -0.01097
  61 3   C  1S          0.00716   0.00828   0.02097  -0.02728  -0.02000
  62        2S         -0.00685  -0.07095  -0.01580   0.03726  -0.01424
  63        3S          0.00672  -0.06131  -0.01133   0.03488  -0.01109
  64        4S         -0.68756   4.02627   0.11071  -0.69284   1.26761
  65        5PX        -0.03081  -0.01342   0.00046   0.00597   0.00368
  66        5PY        -0.00844   0.01087   0.00129  -0.00515  -0.00385
  67        5PZ        -0.00615  -0.03056  -0.00457   0.01812  -0.00271
  68        6PX        -0.03991   0.01337  -0.03512  -0.08664  -0.00318
  69        6PY        -0.03522   0.12039  -0.08396   0.21633   0.15699
  70        6PZ        -0.01721  -0.02648   0.01796   0.09663  -0.01407
  71        7PX         0.05037   0.18013  -0.05268  -0.14867   0.08227
  72        7PY        -0.43665   1.08910  -1.19349   0.77407   1.77988
  73        7PZ        -0.45846   2.15967  -0.23959   0.90886   1.83903
  74        8D 0        0.00056  -0.00809   0.00471  -0.01551  -0.01068
  75        8D+1       -0.01110   0.00451  -0.00974  -0.00530  -0.01732
  76        8D-1        0.00145  -0.01608  -0.00258   0.00298  -0.01240
  77        8D+2       -0.00589   0.00899  -0.02093  -0.00288   0.01517
  78        8D-2        0.00550  -0.00575   0.00960  -0.00070   0.01374
  79        9D 0        0.00642  -0.00750  -0.02700  -0.04297   0.03769
  80        9D+1        0.04521  -0.02431   0.05122   0.10070   0.03410
  81        9D-1       -0.01755   0.04810  -0.10342   0.17078   0.18407
  82        9D+2        0.03267  -0.08706   0.11411  -0.09584  -0.13777
  83        9D-2       -0.05661   0.03626  -0.05627   0.01240  -0.08672
  84       10F 0        0.00225  -0.00004   0.01615  -0.01345  -0.01327
  85       10F+1       -0.00430   0.00912  -0.00219  -0.01270  -0.00827
  86       10F-1       -0.00157  -0.00644  -0.00624   0.01015   0.00355
  87       10F+2        0.00425  -0.02326  -0.00040   0.01649  -0.00808
  88       10F-2        0.00126  -0.00435   0.00083   0.00224   0.00326
  89       10F+3       -0.00121  -0.00044  -0.00370  -0.00264  -0.00031
  90       10F-3        0.00250  -0.01058   0.00196   0.00088  -0.00583
  91 4   C  1S          0.00716  -0.00828  -0.02097  -0.02728   0.02000
  92        2S         -0.00685   0.07095   0.01580   0.03726   0.01424
  93        3S          0.00672   0.06131   0.01133   0.03488   0.01109
  94        4S         -0.68756  -4.02627  -0.11071  -0.69284  -1.26761
  95        5PX        -0.03081   0.01342  -0.00046   0.00597  -0.00368
  96        5PY        -0.00844  -0.01087  -0.00129  -0.00515   0.00385
  97        5PZ         0.00615  -0.03056  -0.00457  -0.01812  -0.00271
  98        6PX        -0.03991  -0.01337   0.03512  -0.08664   0.00318
  99        6PY        -0.03522  -0.12039   0.08396   0.21633  -0.15699
 100        6PZ         0.01721  -0.02648   0.01796  -0.09663  -0.01407
 101        7PX         0.05037  -0.18013   0.05268  -0.14867  -0.08227
 102        7PY        -0.43665  -1.08910   1.19349   0.77407  -1.77988
 103        7PZ         0.45846   2.15967  -0.23959  -0.90886   1.83903
 104        8D 0        0.00056   0.00809  -0.00471  -0.01551   0.01068
 105        8D+1        0.01110   0.00451  -0.00974   0.00530  -0.01732
 106        8D-1       -0.00145  -0.01608  -0.00258  -0.00298  -0.01240
 107        8D+2       -0.00589  -0.00899   0.02093  -0.00288  -0.01517
 108        8D-2        0.00550   0.00575  -0.00960  -0.00070  -0.01374
 109        9D 0        0.00642   0.00750   0.02700  -0.04297  -0.03769
 110        9D+1       -0.04521  -0.02431   0.05122  -0.10070   0.03410
 111        9D-1        0.01755   0.04810  -0.10342  -0.17078   0.18407
 112        9D+2        0.03267   0.08706  -0.11411  -0.09584   0.13777
 113        9D-2       -0.05661  -0.03626   0.05627   0.01240   0.08672
 114       10F 0       -0.00225  -0.00004   0.01615   0.01345  -0.01327
 115       10F+1       -0.00430  -0.00912   0.00219  -0.01270   0.00827
 116       10F-1       -0.00157   0.00644   0.00624   0.01015  -0.00355
 117       10F+2       -0.00425  -0.02326  -0.00040  -0.01649  -0.00808
 118       10F-2       -0.00126  -0.00435   0.00083  -0.00224   0.00326
 119       10F+3       -0.00121   0.00044   0.00370  -0.00264   0.00031
 120       10F-3        0.00250   0.01058  -0.00196   0.00088   0.00583
 121 5   Si 1S         -0.00168   0.00000   0.00000  -0.02613   0.00000
 122        2S          0.00023   0.00000   0.00000  -0.07275   0.00000
 123        3S         -0.03284   0.00000   0.00000  -0.69868   0.00000
 124        4S         -0.00539   0.00000   0.00000  -0.28180   0.00000
 125        5S          0.15153   0.00000   0.00000   3.20569   0.00000
 126        6PX        -0.04189   0.00000   0.00000  -0.01332   0.00000
 127        6PY        -0.00520   0.00000   0.00000   0.07382   0.00000
 128        6PZ         0.00000   0.11452   0.07208   0.00000  -0.03426
 129        7PX         0.68926   0.00000   0.00000   0.14315   0.00000
 130        7PY         0.16076   0.00000   0.00000  -0.49097   0.00000
 131        7PZ         0.00000  -0.14250  -0.29001   0.00000   0.35060
 132        8PX        -0.01666   0.00000   0.00000   0.00195   0.00000
 133        8PY        -0.00730   0.00000   0.00000  -0.02283   0.00000
 134        8PZ         0.00000  -0.05955  -0.03111   0.00000   0.01010
 135        9PX         0.51347   0.00000   0.00000   0.42239   0.00000
 136        9PY         0.60851   0.00000   0.00000   0.57815   0.00000
 137        9PZ         0.00000   1.16505   1.77712   0.00000  -1.55300
 138       10D 0       -0.00805   0.00000   0.00000   0.33721   0.00000
 139       10D+1        0.00000  -0.41110   0.45372   0.00000   0.68593
 140       10D-1        0.00000   0.75086   0.66560   0.00000  -0.22431
 141       10D+2        0.34471   0.00000   0.00000  -0.07177   0.00000
 142       10D-2       -0.74111   0.00000   0.00000  -0.28341   0.00000
 143       11D 0        0.00488   0.00000   0.00000   0.00105   0.00000
 144       11D+1        0.00000  -0.03236   0.07054   0.00000   0.04356
 145       11D-1        0.00000  -0.00371  -0.01552   0.00000   0.04211
 146       11D+2        0.06686   0.00000   0.00000   0.03772   0.00000
 147       11D-2       -0.09355   0.00000   0.00000  -0.00715   0.00000
 148       12F 0        0.00000  -0.01736  -0.00155   0.00000  -0.00256
 149       12F+1       -0.08174   0.00000   0.00000  -0.04343   0.00000
 150       12F-1       -0.02622   0.00000   0.00000   0.14840   0.00000
 151       12F+2        0.00000  -0.05307  -0.03958   0.00000   0.01004
 152       12F-2        0.00000  -0.03993   0.00072   0.00000   0.04637
 153       12F+3        0.00035   0.00000   0.00000   0.06149   0.00000
 154       12F-3       -0.00692   0.00000   0.00000  -0.05200   0.00000
 155 6   H  1S          0.01609   0.01154  -0.01325  -0.01252  -0.03755
 156        2S          0.00390   0.30618   0.10403   0.60897  -0.52414
 157        3S          0.01883  -0.48574  -0.15726   0.31853  -0.13620
 158        4PX         0.00051  -0.01079   0.00051  -0.00394   0.00112
 159        4PY        -0.00351  -0.00979   0.00376   0.00027  -0.00401
 160        4PZ        -0.00001  -0.00092  -0.00344  -0.00889   0.01506
 161        5PX        -0.02221  -0.03379   0.03904  -0.09856  -0.00250
 162        5PY         0.03776   0.04452  -0.06094   0.00602  -0.06468
 163        5PZ         0.01473  -0.06939  -0.05136  -0.15263  -0.01006
 164        6D 0       -0.00287  -0.00031   0.00774   0.00510  -0.00291
 165        6D+1        0.00186   0.00794  -0.00308   0.01209   0.00098
 166        6D-1       -0.00288  -0.00390   0.00284  -0.00142   0.00769
 167        6D+2       -0.00052   0.00227  -0.00227   0.00189   0.00374
 168        6D-2       -0.00159   0.00040   0.00148  -0.00158   0.00546
 169 7   H  1S         -0.02478  -0.02174   0.04165  -0.01358   0.01531
 170        2S         -0.01654   0.02340   0.51535   0.26508  -0.19148
 171        3S         -0.39688  -0.37446  -0.10161   0.21681  -0.38163
 172        4PX         0.00474   0.00526   0.00840   0.00094   0.00413
 173        4PY        -0.00097  -0.00515   0.00199  -0.00118  -0.00686
 174        4PZ         0.00164   0.00553  -0.00944  -0.00457   0.00911
 175        5PX        -0.02398   0.02492   0.02016   0.03799  -0.01345
 176        5PY        -0.03162  -0.02770   0.05475   0.02049   0.06500
 177        5PZ        -0.04100  -0.06812  -0.01331  -0.07792   0.05707
 178        6D 0        0.00296  -0.00001   0.00040   0.00298  -0.00816
 179        6D+1       -0.00223  -0.00397  -0.00217  -0.00626   0.00392
 180        6D-1        0.00157   0.00130  -0.00525  -0.00272  -0.00306
 181        6D+2        0.00011   0.00404  -0.00137   0.00123   0.00273
 182        6D-2       -0.00343  -0.00315   0.00571   0.00142   0.00230
 183 8   H  1S         -0.02478   0.02174  -0.04165  -0.01358  -0.01531
 184        2S         -0.01654  -0.02340  -0.51535   0.26508   0.19148
 185        3S         -0.39688   0.37446   0.10161   0.21681   0.38163
 186        4PX         0.00474  -0.00526  -0.00840   0.00094  -0.00413
 187        4PY        -0.00097   0.00515  -0.00199  -0.00118   0.00686
 188        4PZ        -0.00164   0.00553  -0.00944   0.00457   0.00911
 189        5PX        -0.02398  -0.02492  -0.02016   0.03799   0.01345
 190        5PY        -0.03162   0.02770  -0.05475   0.02049  -0.06500
 191        5PZ         0.04100  -0.06812  -0.01331   0.07792   0.05707
 192        6D 0        0.00296   0.00001  -0.00040   0.00298   0.00816
 193        6D+1        0.00223  -0.00397  -0.00217   0.00626   0.00392
 194        6D-1       -0.00157   0.00130  -0.00525   0.00272  -0.00306
 195        6D+2        0.00011  -0.00404   0.00137   0.00123  -0.00273
 196        6D-2       -0.00343   0.00315  -0.00571   0.00142  -0.00230
 197 9   H  1S          0.01609  -0.01154   0.01325  -0.01252   0.03755
 198        2S          0.00390  -0.30618  -0.10403   0.60897   0.52414
 199        3S          0.01883   0.48574   0.15726   0.31853   0.13620
 200        4PX         0.00051   0.01079  -0.00051  -0.00394  -0.00112
 201        4PY        -0.00351   0.00979  -0.00376   0.00027   0.00401
 202        4PZ         0.00001  -0.00092  -0.00344   0.00889   0.01506
 203        5PX        -0.02221   0.03379  -0.03904  -0.09856   0.00250
 204        5PY         0.03776  -0.04452   0.06094   0.00602   0.06468
 205        5PZ        -0.01473  -0.06939  -0.05136   0.15263  -0.01006
 206        6D 0       -0.00287   0.00031  -0.00774   0.00510   0.00291
 207        6D+1       -0.00186   0.00794  -0.00308  -0.01209   0.00098
 208        6D-1        0.00288  -0.00390   0.00284   0.00142   0.00769
 209        6D+2       -0.00052  -0.00227   0.00227   0.00189  -0.00374
 210        6D-2       -0.00159  -0.00040  -0.00148  -0.00158  -0.00546
 211 10  H  1S          0.00164  -0.00142  -0.02044  -0.01268   0.01920
 212        2S          0.08104  -0.21995   0.00783  -0.41753  -0.04732
 213        3S          0.22166  -1.73304  -0.50285  -0.30109  -0.66914
 214        4PX        -0.00158  -0.00063   0.00103  -0.00056   0.00112
 215        4PY        -0.00135  -0.00100  -0.00525   0.01091   0.00241
 216        4PZ        -0.00228  -0.00669  -0.00578  -0.00080  -0.00061
 217        5PX         0.01844   0.01185  -0.00612  -0.00106  -0.02104
 218        5PY        -0.02647   0.03967  -0.04092   0.12949   0.04315
 219        5PZ         0.01855   0.00431   0.02206  -0.00260   0.02307
 220        6D 0       -0.00061   0.00564  -0.00101   0.00699   0.00413
 221        6D+1        0.00047  -0.00072   0.00126  -0.00037   0.00064
 222        6D-1       -0.00270   0.00620  -0.00193   0.00899   0.00259
 223        6D+2       -0.00190   0.00196  -0.00477   0.01577   0.00657
 224        6D-2       -0.00032  -0.00102   0.00025   0.00135   0.00183
 225 11  H  1S          0.00164   0.00142   0.02044  -0.01268  -0.01920
 226        2S          0.08104   0.21995  -0.00783  -0.41753   0.04732
 227        3S          0.22166   1.73304   0.50285  -0.30109   0.66914
 228        4PX        -0.00158   0.00063  -0.00103  -0.00056  -0.00112
 229        4PY        -0.00135   0.00100   0.00525   0.01091  -0.00241
 230        4PZ         0.00228  -0.00669  -0.00578   0.00080  -0.00061
 231        5PX         0.01844  -0.01185   0.00612  -0.00106   0.02104
 232        5PY        -0.02647  -0.03967   0.04092   0.12949  -0.04315
 233        5PZ        -0.01855   0.00431   0.02206   0.00260   0.02307
 234        6D 0       -0.00061  -0.00564   0.00101   0.00699  -0.00413
 235        6D+1       -0.00047  -0.00072   0.00126   0.00037   0.00064
 236        6D-1        0.00270   0.00620  -0.00193  -0.00899   0.00259
 237        6D+2       -0.00190  -0.00196   0.00477   0.01577  -0.00657
 238        6D-2       -0.00032   0.00102  -0.00025   0.00135  -0.00183
 239 12  H  1S         -0.04302   0.00000   0.00000  -0.02201   0.00000
 240        2S         -0.16737   0.00000   0.00000  -0.16752   0.00000
 241        3S          1.98414   0.00000   0.00000  -0.16412   0.00000
 242        4PX        -0.01659   0.00000   0.00000  -0.00020   0.00000
 243        4PY        -0.01545   0.00000   0.00000  -0.00087   0.00000
 244        4PZ         0.00000  -0.00055  -0.00016   0.00000  -0.00465
 245        5PX         0.12451   0.00000   0.00000  -0.04421   0.00000
 246        5PY         0.14499   0.00000   0.00000  -0.06396   0.00000
 247        5PZ         0.00000   0.01081  -0.03840   0.00000  -0.03105
 248        6D 0       -0.00807   0.00000   0.00000   0.00436   0.00000
 249        6D+1        0.00000   0.00179   0.00307   0.00000  -0.00279
 250        6D-1        0.00000  -0.00073   0.00241   0.00000  -0.00058
 251        6D+2       -0.00297   0.00000   0.00000  -0.00125   0.00000
 252        6D-2        0.01428   0.00000   0.00000  -0.00802   0.00000
 253 13  H  1S          0.04509   0.00000   0.00000  -0.00873   0.00000
 254        2S          0.19692   0.00000   0.00000  -0.27248   0.00000
 255        3S         -1.73152   0.00000   0.00000  -1.10172   0.00000
 256        4PX        -0.02133   0.00000   0.00000  -0.00620   0.00000
 257        4PY         0.00544   0.00000   0.00000   0.00265   0.00000
 258        4PZ         0.00000  -0.00126   0.00573   0.00000   0.00101
 259        5PX         0.18173   0.00000   0.00000   0.14012   0.00000
 260        5PY        -0.04939   0.00000   0.00000  -0.07020   0.00000
 261        5PZ         0.00000  -0.03681   0.01705   0.00000   0.01989
 262        6D 0        0.00869   0.00000   0.00000   0.00601   0.00000
 263        6D+1        0.00000  -0.00181  -0.00054   0.00000   0.00280
 264        6D-1        0.00000  -0.00043  -0.00243   0.00000  -0.00164
 265        6D+2       -0.01028   0.00000   0.00000  -0.00869   0.00000
 266        6D-2        0.01015   0.00000   0.00000   0.00693   0.00000
                          41        42        43        44        45
                           V         V         V         V         V
     Eigenvalues --     0.40471   0.43588   0.45026   0.45469   0.46796
   1 1   C  1S         -0.00328   0.00431   0.02773   0.00538   0.00616
   2        2S         -0.01609   0.04578  -0.11032  -0.04639  -0.02256
   3        3S          0.00498   0.02862  -0.01217  -0.00070  -0.01891
   4        4S         -0.00090   0.20087  -2.90788   0.80175   0.89431
   5        5PX        -0.00242   0.02610   0.00652   0.00442  -0.08128
   6        5PY         0.01850  -0.02215   0.03878  -0.01176  -0.01871
   7        5PZ        -0.03979  -0.00283  -0.01101  -0.01555   0.01628
   8        6PX        -0.02390   0.07732   0.02564   0.03809  -0.31971
   9        6PY         0.30499  -0.00517   0.04835   0.01473   0.04383
  10        6PZ        -0.13031  -0.14254   0.29454  -0.09485   0.14926
  11        7PX         0.10006  -0.14144   0.02252  -0.08033   0.66534
  12        7PY        -0.32181   0.35098   1.01713  -0.59152  -0.04952
  13        7PZ         0.44046   0.74632   1.15105   0.67937   0.01519
  14        8D 0        0.02477   0.00762   0.00445   0.00649  -0.00984
  15        8D+1       -0.00181  -0.00041  -0.00068  -0.00071  -0.00624
  16        8D-1        0.01150   0.01478   0.00675   0.03662   0.00365
  17        8D+2        0.01579   0.00064  -0.00141  -0.00259  -0.00336
  18        8D-2        0.00378  -0.00203   0.00046  -0.00219   0.00731
  19        9D 0       -0.10411  -0.06984  -0.26870  -0.07069   0.00983
  20        9D+1        0.00850  -0.01035   0.01283   0.00563   0.11832
  21        9D-1        0.01451   0.02642   0.02597  -0.04493   0.10263
  22        9D+2       -0.04674   0.03160  -0.07592  -0.00874  -0.07327
  23        9D-2       -0.00287   0.03975  -0.01802   0.00220   0.01473
  24       10F 0        0.00077   0.01027   0.02386   0.00265  -0.00701
  25       10F+1        0.00154   0.00068  -0.00307   0.00073   0.00646
  26       10F-1       -0.01025  -0.00066  -0.00520  -0.00513   0.00397
  27       10F+2       -0.01793   0.00316  -0.00045  -0.00495  -0.00902
  28       10F-2       -0.00049   0.00232   0.00117   0.00047  -0.00736
  29       10F+3        0.00062   0.00269  -0.00126   0.00100  -0.00601
  30       10F-3       -0.00373  -0.00317   0.00102   0.00275  -0.00265
  31 2   C  1S         -0.00328   0.00431  -0.02773   0.00538   0.00616
  32        2S         -0.01609   0.04578   0.11032  -0.04639  -0.02256
  33        3S          0.00498   0.02862   0.01217  -0.00070  -0.01891
  34        4S         -0.00090   0.20087   2.90788   0.80175   0.89431
  35        5PX        -0.00242   0.02610  -0.00652   0.00442  -0.08128
  36        5PY         0.01850  -0.02215  -0.03878  -0.01176  -0.01871
  37        5PZ         0.03979   0.00283  -0.01101   0.01555  -0.01628
  38        6PX        -0.02390   0.07732  -0.02564   0.03809  -0.31971
  39        6PY         0.30499  -0.00517  -0.04835   0.01473   0.04383
  40        6PZ         0.13031   0.14254   0.29454   0.09485  -0.14926
  41        7PX         0.10006  -0.14144  -0.02252  -0.08033   0.66534
  42        7PY        -0.32181   0.35098  -1.01713  -0.59152  -0.04952
  43        7PZ        -0.44046  -0.74632   1.15105  -0.67937  -0.01519
  44        8D 0        0.02477   0.00762  -0.00445   0.00649  -0.00984
  45        8D+1        0.00181   0.00041  -0.00068   0.00071   0.00624
  46        8D-1       -0.01150  -0.01478   0.00675  -0.03662  -0.00365
  47        8D+2        0.01579   0.00064   0.00141  -0.00259  -0.00336
  48        8D-2        0.00378  -0.00203  -0.00046  -0.00219   0.00731
  49        9D 0       -0.10411  -0.06984   0.26870  -0.07069   0.00983
  50        9D+1       -0.00850   0.01035   0.01283  -0.00563  -0.11832
  51        9D-1       -0.01451  -0.02642   0.02597   0.04493  -0.10263
  52        9D+2       -0.04674   0.03160   0.07592  -0.00874  -0.07327
  53        9D-2       -0.00287   0.03975   0.01802   0.00220   0.01473
  54       10F 0       -0.00077  -0.01027   0.02386  -0.00265   0.00701
  55       10F+1        0.00154   0.00068   0.00307   0.00073   0.00646
  56       10F-1       -0.01025  -0.00066   0.00520  -0.00513   0.00397
  57       10F+2        0.01793  -0.00316  -0.00045   0.00495   0.00902
  58       10F-2        0.00049  -0.00232   0.00117  -0.00047   0.00736
  59       10F+3        0.00062   0.00269   0.00126   0.00100  -0.00601
  60       10F-3       -0.00373  -0.00317  -0.00102   0.00275  -0.00265
  61 3   C  1S          0.00512  -0.02451   0.02022   0.01780   0.01387
  62        2S         -0.05071   0.06031  -0.14707  -0.08281   0.00564
  63        3S         -0.00356   0.02439  -0.05652  -0.00186   0.00271
  64        4S         -0.84737  -1.55236   1.20829  -0.53638  -0.15151
  65        5PX         0.00655   0.00741  -0.01457   0.00509   0.02983
  66        5PY        -0.02824  -0.11196   0.05139  -0.04637  -0.01479
  67        5PZ        -0.04240   0.05191  -0.06350  -0.01264   0.00017
  68        6PX        -0.04246  -0.00205  -0.02024  -0.03035  -0.00652
  69        6PY        -0.15134  -0.11731   0.06701  -0.16356  -0.02812
  70        6PZ        -0.12069   0.17225  -0.08541  -0.17654   0.00553
  71        7PX        -0.29795   0.10278   0.38336   0.05618  -0.63100
  72        7PY         1.24613   0.02974  -2.00535  -0.40311  -0.47968
  73        7PZ        -0.13283   0.49176   1.61515   0.19619  -0.69954
  74        8D 0       -0.00784  -0.00065  -0.01622   0.00139   0.01217
  75        8D+1       -0.00202  -0.00327  -0.00809  -0.00417  -0.00702
  76        8D-1       -0.02752  -0.00018   0.02687   0.00431   0.00234
  77        8D+2        0.00337   0.00044   0.00853   0.02414  -0.00644
  78        8D-2       -0.00265  -0.00222   0.00368   0.00533   0.00768
  79        9D 0        0.00898  -0.03514   0.12377   0.01597  -0.06443
  80        9D+1        0.07008   0.03534   0.04704   0.03223   0.03010
  81        9D-1        0.08633   0.07142  -0.13948   0.04547   0.00835
  82        9D+2       -0.03325  -0.10952  -0.08575   0.02739   0.10360
  83        9D-2        0.00713   0.01873  -0.03546   0.00562  -0.09347
  84       10F 0       -0.00194  -0.00531  -0.00676  -0.00600   0.00573
  85       10F+1       -0.00654  -0.00801   0.00317  -0.00399  -0.00191
  86       10F-1        0.00090   0.00131  -0.01199   0.00501  -0.00096
  87       10F+2        0.00555   0.00601  -0.01662   0.00562  -0.00014
  88       10F-2       -0.00008   0.00093  -0.00469   0.00032  -0.00223
  89       10F+3       -0.00236  -0.00154  -0.00306  -0.00137  -0.00769
  90       10F-3       -0.00998  -0.00510   0.00357  -0.00183  -0.00061
  91 4   C  1S          0.00512  -0.02451  -0.02022   0.01780   0.01387
  92        2S         -0.05071   0.06031   0.14707  -0.08281   0.00564
  93        3S         -0.00356   0.02439   0.05652  -0.00186   0.00271
  94        4S         -0.84737  -1.55236  -1.20829  -0.53638  -0.15151
  95        5PX         0.00655   0.00741   0.01457   0.00509   0.02983
  96        5PY        -0.02824  -0.11196  -0.05139  -0.04637  -0.01479
  97        5PZ         0.04240  -0.05191  -0.06350   0.01264  -0.00017
  98        6PX        -0.04246  -0.00205   0.02024  -0.03035  -0.00652
  99        6PY        -0.15134  -0.11731  -0.06701  -0.16356  -0.02812
 100        6PZ         0.12069  -0.17225  -0.08541   0.17654  -0.00553
 101        7PX        -0.29795   0.10278  -0.38336   0.05618  -0.63100
 102        7PY         1.24613   0.02974   2.00535  -0.40311  -0.47968
 103        7PZ         0.13283  -0.49176   1.61515  -0.19619   0.69954
 104        8D 0       -0.00784  -0.00065   0.01622   0.00139   0.01217
 105        8D+1        0.00202   0.00327  -0.00809   0.00417   0.00702
 106        8D-1        0.02752   0.00018   0.02687  -0.00431  -0.00234
 107        8D+2        0.00337   0.00044  -0.00853   0.02414  -0.00644
 108        8D-2       -0.00265  -0.00222  -0.00368   0.00533   0.00768
 109        9D 0        0.00898  -0.03514  -0.12377   0.01597  -0.06443
 110        9D+1       -0.07008  -0.03534   0.04704  -0.03223  -0.03010
 111        9D-1       -0.08633  -0.07142  -0.13948  -0.04547  -0.00835
 112        9D+2       -0.03325  -0.10952   0.08575   0.02739   0.10360
 113        9D-2        0.00713   0.01873   0.03546   0.00562  -0.09347
 114       10F 0        0.00194   0.00531  -0.00676   0.00600  -0.00573
 115       10F+1       -0.00654  -0.00801  -0.00317  -0.00399  -0.00191
 116       10F-1        0.00090   0.00131   0.01199   0.00501  -0.00096
 117       10F+2       -0.00555  -0.00601  -0.01662  -0.00562   0.00014
 118       10F-2        0.00008  -0.00093  -0.00469  -0.00032   0.00223
 119       10F+3       -0.00236  -0.00154   0.00306  -0.00137  -0.00769
 120       10F-3       -0.00998  -0.00510  -0.00357  -0.00183  -0.00061
 121 5   Si 1S          0.00806  -0.00445   0.00000  -0.03040  -0.00030
 122        2S         -0.06165   0.08524   0.00000   0.01901   0.03438
 123        3S          0.00732   0.10572   0.00000  -0.56374   0.07963
 124        4S         -0.03547   0.05334   0.00000  -0.31258   0.00418
 125        5S          2.05203  -2.22086   0.00000   3.47235   0.32939
 126        6PX         0.02513  -0.02333   0.00000  -0.00074   0.07654
 127        6PY        -0.00108   0.09432   0.00000  -0.02683   0.01665
 128        6PZ         0.00000   0.00000   0.08483   0.00000   0.00000
 129        7PX        -0.11668   0.04931   0.00000   0.11654  -0.24418
 130        7PY         0.35944  -0.28655   0.00000  -0.29675   0.04695
 131        7PZ         0.00000   0.00000   0.37204   0.00000   0.00000
 132        8PX        -0.00835   0.01256   0.00000  -0.00666  -0.02979
 133        8PY        -0.01167  -0.04793   0.00000   0.02681  -0.00739
 134        8PZ         0.00000   0.00000  -0.07539   0.00000   0.00000
 135        9PX         0.65543  -0.17294   0.00000   0.42517   2.67388
 136        9PY         0.44111   2.30860   0.00000  -1.41342   0.97309
 137        9PZ         0.00000   0.00000   3.46496   0.00000   0.00000
 138       10D 0        0.69820   0.53151   0.00000  -0.88211  -0.25103
 139       10D+1        0.00000   0.00000  -0.28479   0.00000   0.00000
 140       10D-1        0.00000   0.00000   1.59416   0.00000   0.00000
 141       10D+2        0.24953  -0.87998   0.00000   0.38024   0.19013
 142       10D-2       -0.34602  -0.52943   0.00000   0.10646  -0.86067
 143       11D 0        0.04833   0.04337   0.00000  -0.11194  -0.02009
 144       11D+1        0.00000   0.00000  -0.02186   0.00000   0.00000
 145       11D-1        0.00000   0.00000   0.13580   0.00000   0.00000
 146       11D+2       -0.02387  -0.04014   0.00000   0.01738   0.01308
 147       11D-2       -0.03959  -0.02655   0.00000   0.02614  -0.07901
 148       12F 0        0.00000   0.00000  -0.02247   0.00000   0.00000
 149       12F+1       -0.04856   0.00265   0.00000  -0.02917  -0.09555
 150       12F-1        0.06843   0.00759   0.00000   0.10931  -0.02817
 151       12F+2        0.00000   0.00000  -0.14962   0.00000   0.00000
 152       12F-2        0.00000   0.00000  -0.05823   0.00000   0.00000
 153       12F+3       -0.03404  -0.07832   0.00000   0.13528   0.01274
 154       12F-3        0.06158   0.08225   0.00000  -0.14278  -0.02302
 155 6   H  1S         -0.01573   0.00312  -0.01963   0.02826   0.01393
 156        2S          0.27049   0.36482  -0.12654   0.29876   0.27222
 157        3S         -0.42870   0.40054  -0.79319  -0.32524  -0.94989
 158        4PX        -0.00636   0.00111  -0.00310  -0.00540  -0.01099
 159        4PY         0.01250   0.00094   0.00887   0.00096  -0.00539
 160        4PZ        -0.00393  -0.00599   0.00331  -0.00779  -0.00345
 161        5PX         0.00662  -0.09448  -0.03611   0.06665   0.01445
 162        5PY        -0.03316  -0.01965  -0.03839  -0.01284   0.05923
 163        5PZ        -0.05578  -0.05850  -0.00361   0.00968   0.02151
 164        6D 0        0.00282   0.00167  -0.00391   0.00388  -0.00482
 165        6D+1        0.00021   0.00640   0.00278  -0.00431   0.00020
 166        6D-1        0.00042   0.00073  -0.00089  -0.00075  -0.00595
 167        6D+2       -0.00230   0.00531   0.00746  -0.00363   0.00179
 168        6D-2       -0.00467   0.00015  -0.00256  -0.00060  -0.00208
 169 7   H  1S         -0.01578  -0.00611  -0.01354   0.02424  -0.00569
 170        2S         -0.05233   0.23604  -0.10963   0.17847  -0.56016
 171        3S         -0.14958   0.48905  -0.69870  -0.24351   0.48975
 172        4PX        -0.00275  -0.00301   0.00120   0.00646  -0.01215
 173        4PY         0.01342  -0.00043   0.00921   0.00185  -0.00247
 174        4PZ         0.00089  -0.00392   0.00466  -0.00417   0.00641
 175        5PX        -0.03259   0.08055   0.03571  -0.10366   0.00135
 176        5PY        -0.04968   0.02198  -0.03602  -0.03466  -0.05021
 177        5PZ        -0.02408  -0.03669   0.00758  -0.00264   0.06154
 178        6D 0        0.00500   0.00206  -0.00348   0.00644  -0.00230
 179        6D+1        0.00072  -0.00354   0.00148   0.00393   0.00363
 180        6D-1        0.00245  -0.00246  -0.00014   0.00027   0.00502
 181        6D+2       -0.00537   0.00481   0.00627  -0.00534   0.00404
 182        6D-2        0.00240   0.00193   0.00497  -0.00105  -0.00435
 183 8   H  1S         -0.01578  -0.00611   0.01354   0.02424  -0.00569
 184        2S         -0.05233   0.23604   0.10963   0.17847  -0.56016
 185        3S         -0.14958   0.48905   0.69870  -0.24351   0.48975
 186        4PX        -0.00275  -0.00301  -0.00120   0.00646  -0.01215
 187        4PY         0.01342  -0.00043  -0.00921   0.00185  -0.00247
 188        4PZ        -0.00089   0.00392   0.00466   0.00417  -0.00641
 189        5PX        -0.03259   0.08055  -0.03571  -0.10366   0.00135
 190        5PY        -0.04968   0.02198   0.03602  -0.03466  -0.05021
 191        5PZ         0.02408   0.03669   0.00758   0.00264  -0.06154
 192        6D 0        0.00500   0.00206   0.00348   0.00644  -0.00230
 193        6D+1       -0.00072   0.00354   0.00148  -0.00393  -0.00363
 194        6D-1       -0.00245   0.00246  -0.00014  -0.00027  -0.00502
 195        6D+2       -0.00537   0.00481  -0.00627  -0.00534   0.00404
 196        6D-2        0.00240   0.00193  -0.00497  -0.00105  -0.00435
 197 9   H  1S         -0.01573   0.00312   0.01963   0.02826   0.01393
 198        2S          0.27049   0.36482   0.12654   0.29876   0.27222
 199        3S         -0.42870   0.40054   0.79319  -0.32524  -0.94989
 200        4PX        -0.00636   0.00111   0.00310  -0.00540  -0.01099
 201        4PY         0.01250   0.00094  -0.00887   0.00096  -0.00539
 202        4PZ         0.00393   0.00599   0.00331   0.00779   0.00345
 203        5PX         0.00662  -0.09448   0.03611   0.06665   0.01445
 204        5PY        -0.03316  -0.01965   0.03839  -0.01284   0.05923
 205        5PZ         0.05578   0.05850  -0.00361  -0.00968  -0.02151
 206        6D 0        0.00282   0.00167   0.00391   0.00388  -0.00482
 207        6D+1       -0.00021  -0.00640   0.00278   0.00431  -0.00020
 208        6D-1       -0.00042  -0.00073  -0.00089   0.00075   0.00595
 209        6D+2       -0.00230   0.00531  -0.00746  -0.00363   0.00179
 210        6D-2       -0.00467   0.00015   0.00256  -0.00060  -0.00208
 211 10  H  1S         -0.02312   0.02932  -0.01180   0.05790   0.01309
 212        2S         -0.38739   0.04459  -0.00069   0.30663  -0.25281
 213        3S          0.15395  -0.47952   1.04690  -0.01051  -0.18739
 214        4PX         0.00029  -0.00190  -0.00053  -0.00006   0.00389
 215        4PY         0.00570  -0.00664   0.00718  -0.01202   0.00309
 216        4PZ        -0.01032  -0.00037  -0.00240  -0.00170   0.00060
 217        5PX        -0.00085   0.01059   0.00562  -0.00791  -0.02929
 218        5PY         0.04564   0.00365  -0.04033   0.05036   0.12389
 219        5PZ        -0.09540  -0.02342   0.10160  -0.05049  -0.07074
 220        6D 0       -0.00633  -0.00270   0.00278  -0.00336   0.00217
 221        6D+1        0.00054  -0.00096  -0.00012  -0.00074   0.00177
 222        6D-1        0.01499  -0.00016  -0.00676   0.00518   0.00621
 223        6D+2        0.00360  -0.00374   0.00111   0.00059   0.00841
 224        6D-2        0.00026   0.00080  -0.00059   0.00079   0.00448
 225 11  H  1S         -0.02312   0.02932   0.01180   0.05790   0.01309
 226        2S         -0.38739   0.04459   0.00069   0.30663  -0.25281
 227        3S          0.15395  -0.47952  -1.04690  -0.01051  -0.18739
 228        4PX         0.00029  -0.00190   0.00053  -0.00006   0.00389
 229        4PY         0.00570  -0.00664  -0.00718  -0.01202   0.00309
 230        4PZ         0.01032   0.00037  -0.00240   0.00170  -0.00060
 231        5PX        -0.00085   0.01059  -0.00562  -0.00791  -0.02929
 232        5PY         0.04564   0.00365   0.04033   0.05036   0.12389
 233        5PZ         0.09540   0.02342   0.10160   0.05049   0.07074
 234        6D 0       -0.00633  -0.00270  -0.00278  -0.00336   0.00217
 235        6D+1       -0.00054   0.00096  -0.00012   0.00074  -0.00177
 236        6D-1       -0.01499   0.00016  -0.00676  -0.00518  -0.00621
 237        6D+2        0.00360  -0.00374  -0.00111   0.00059   0.00841
 238        6D-2        0.00026   0.00080   0.00059   0.00079   0.00448
 239 12  H  1S         -0.05597   0.00900   0.00000   0.05328  -0.03075
 240        2S         -0.12610   0.65879   0.00000  -0.24942   0.36077
 241        3S          0.82590   1.58340   0.00000  -1.91139   1.65727
 242        4PX        -0.01145  -0.00020   0.00000   0.00630  -0.00429
 243        4PY        -0.00573  -0.00824   0.00000   0.01682  -0.01103
 244        4PZ         0.00000   0.00000  -0.00036   0.00000   0.00000
 245        5PX         0.11540   0.10650   0.00000  -0.15392   0.10806
 246        5PY         0.08043   0.13638   0.00000  -0.28770   0.15124
 247        5PZ         0.00000   0.00000  -0.00859   0.00000   0.00000
 248        6D 0       -0.00430  -0.00391   0.00000   0.00925  -0.00284
 249        6D+1        0.00000   0.00000   0.00257   0.00000   0.00000
 250        6D-1        0.00000   0.00000   0.00200   0.00000   0.00000
 251        6D+2       -0.00344  -0.00862   0.00000   0.00776  -0.00204
 252        6D-2        0.00583   0.00601   0.00000  -0.01574   0.00469
 253 13  H  1S         -0.02517   0.00584   0.00000   0.04573   0.04814
 254        2S         -0.43113   0.58313   0.00000  -0.43503  -0.30074
 255        3S         -0.24420   1.10386   0.00000  -1.91549  -1.71563
 256        4PX         0.00400   0.00216   0.00000  -0.01345  -0.01120
 257        4PY         0.00264  -0.00586   0.00000   0.00860   0.00426
 258        4PZ         0.00000   0.00000   0.00135   0.00000   0.00000
 259        5PX        -0.00700  -0.13599   0.00000   0.28830   0.19204
 260        5PY        -0.03947   0.07148   0.00000  -0.15776  -0.09186
 261        5PZ         0.00000   0.00000  -0.00731   0.00000   0.00000
 262        6D 0       -0.00291  -0.00384   0.00000   0.00857   0.00269
 263        6D+1        0.00000   0.00000  -0.00489   0.00000   0.00000
 264        6D-1        0.00000   0.00000   0.00032   0.00000   0.00000
 265        6D+2        0.00201  -0.00086   0.00000  -0.00874  -0.00464
 266        6D-2       -0.00129  -0.01105   0.00000   0.01521   0.00383
                          46        47        48        49        50
                           V         V         V         V         V
     Eigenvalues --     0.48465   0.50437   0.51350   0.53798   0.57064
   1 1   C  1S          0.00315   0.02532  -0.01964   0.00465   0.00838
   2        2S         -0.04827  -0.09075   0.01179   0.08156   0.02413
   3        3S         -0.03309  -0.03045  -0.01046   0.04689   0.00374
   4        4S          1.09426   0.38791  -2.09135  -1.67790  -0.33404
   5        5PX         0.10027  -0.00542  -0.01276   0.01788  -0.00569
   6        5PY        -0.01293  -0.00204  -0.03302  -0.00795   0.11469
   7        5PZ         0.02777   0.00760   0.05001  -0.04073  -0.05199
   8        6PX         0.37020  -0.00944  -0.02433   0.05767   0.01638
   9        6PY         0.14385   0.06519   0.06503  -0.47332  -0.30349
  10        6PZ         0.25283   0.17571   0.19313  -0.33439  -0.26403
  11        7PX        -0.56636   0.01658  -0.11246  -0.18671  -0.22281
  12        7PY        -0.18755   0.11425  -3.38427   0.24556  -0.89297
  13        7PZ        -0.19174  -0.49684   5.33569  -0.00403   0.00959
  14        8D 0       -0.01256  -0.01305   0.01505   0.00579   0.01429
  15        8D+1       -0.00493  -0.00149   0.00021   0.00013   0.00266
  16        8D-1        0.00168   0.00870   0.00689  -0.00006  -0.02574
  17        8D+2       -0.00225  -0.00816   0.01169  -0.00321   0.00730
  18        8D-2       -0.00196  -0.00121  -0.00281  -0.00236  -0.00612
  19        9D 0        0.00290  -0.00800  -0.07592   0.10243  -0.04375
  20        9D+1       -0.09334  -0.00044  -0.01041  -0.02405  -0.00016
  21        9D-1        0.13423   0.11257  -0.07083  -0.21334  -0.33737
  22        9D+2       -0.09543  -0.06910  -0.03272   0.14036  -0.02687
  23        9D-2        0.03700  -0.00800   0.01514   0.03908  -0.01325
  24       10F 0       -0.01560  -0.00750  -0.00529   0.02591   0.01293
  25       10F+1       -0.00314  -0.00097   0.00095  -0.00081  -0.00241
  26       10F-1        0.00510   0.00430   0.01429  -0.00427   0.00115
  27       10F+2       -0.01632  -0.00769  -0.01402   0.03749   0.01433
  28       10F-2        0.00938   0.00001  -0.00068   0.00434   0.00345
  29       10F+3        0.00843   0.00007   0.00028   0.00010  -0.00199
  30       10F-3       -0.00590  -0.00200   0.00068   0.01344   0.02374
  31 2   C  1S          0.00315   0.02532   0.01964   0.00465   0.00838
  32        2S         -0.04827  -0.09075  -0.01179   0.08156   0.02413
  33        3S         -0.03309  -0.03045   0.01046   0.04689   0.00374
  34        4S          1.09426   0.38791   2.09135  -1.67790  -0.33404
  35        5PX         0.10027  -0.00542   0.01276   0.01788  -0.00569
  36        5PY        -0.01293  -0.00204   0.03302  -0.00795   0.11469
  37        5PZ        -0.02777  -0.00760   0.05001   0.04073   0.05199
  38        6PX         0.37020  -0.00944   0.02433   0.05767   0.01638
  39        6PY         0.14385   0.06519  -0.06503  -0.47332  -0.30349
  40        6PZ        -0.25283  -0.17571   0.19313   0.33439   0.26403
  41        7PX        -0.56636   0.01658   0.11246  -0.18671  -0.22281
  42        7PY        -0.18755   0.11425   3.38427   0.24556  -0.89297
  43        7PZ         0.19174   0.49684   5.33569   0.00403  -0.00959
  44        8D 0       -0.01256  -0.01305  -0.01505   0.00579   0.01429
  45        8D+1        0.00493   0.00149   0.00021  -0.00013  -0.00266
  46        8D-1       -0.00168  -0.00870   0.00689   0.00006   0.02574
  47        8D+2       -0.00225  -0.00816  -0.01169  -0.00321   0.00730
  48        8D-2       -0.00196  -0.00121   0.00281  -0.00236  -0.00612
  49        9D 0        0.00290  -0.00800   0.07592   0.10243  -0.04375
  50        9D+1        0.09334   0.00044  -0.01041   0.02405   0.00016
  51        9D-1       -0.13423  -0.11257  -0.07083   0.21334   0.33737
  52        9D+2       -0.09543  -0.06910   0.03272   0.14036  -0.02687
  53        9D-2        0.03700  -0.00800  -0.01514   0.03908  -0.01325
  54       10F 0        0.01560   0.00750  -0.00529  -0.02591  -0.01293
  55       10F+1       -0.00314  -0.00097  -0.00095  -0.00081  -0.00241
  56       10F-1        0.00510   0.00430  -0.01429  -0.00427   0.00115
  57       10F+2        0.01632   0.00769  -0.01402  -0.03749  -0.01433
  58       10F-2       -0.00938  -0.00001  -0.00068  -0.00434  -0.00345
  59       10F+3        0.00843   0.00007  -0.00028   0.00010  -0.00199
  60       10F-3       -0.00590  -0.00200  -0.00068   0.01344   0.02374
  61 3   C  1S          0.01913   0.02153  -0.01130   0.01302  -0.05626
  62        2S         -0.00929   0.02412   0.07026  -0.05758   0.22962
  63        3S          0.00183   0.03078  -0.01990  -0.02377   0.10673
  64        4S         -0.19689  -1.51242   4.85366   0.50740  -3.17914
  65        5PX        -0.01656  -0.00463  -0.00385  -0.03183  -0.01782
  66        5PY        -0.00833  -0.00793   0.07884   0.08726   0.03463
  67        5PZ        -0.01317  -0.00335   0.04124  -0.01385   0.10672
  68        6PX        -0.07507  -0.06386  -0.02911   0.03238   0.18561
  69        6PY        -0.03966   0.01497   0.10665   0.26903   0.00419
  70        6PZ        -0.02382  -0.05106   0.18569  -0.14480   0.27588
  71        7PX        -0.22346  -0.43961  -0.25459   0.55780   0.85794
  72        7PY        -0.36152   0.76704   2.88870  -0.05280   0.36174
  73        7PZ        -1.01378  -2.57626  -0.22314   0.29117  -2.01955
  74        8D 0        0.01225   0.02581   0.02315  -0.00554   0.00476
  75        8D+1       -0.01045   0.00890   0.00119  -0.00986  -0.00231
  76        8D-1        0.00106  -0.00548  -0.00812   0.00678  -0.01047
  77        8D+2       -0.00753  -0.00686   0.00418   0.00863  -0.00901
  78        8D-2       -0.00958  -0.00220  -0.00025   0.00026   0.00067
  79        9D 0       -0.07367  -0.13475  -0.07008   0.14417  -0.02536
  80        9D+1        0.11295  -0.02647   0.00799  -0.07136  -0.17965
  81        9D-1       -0.01684   0.09654   0.03189  -0.00355  -0.03581
  82        9D+2        0.09616   0.15366   0.07612  -0.00762  -0.03081
  83        9D-2        0.13562   0.03522   0.00997  -0.00855  -0.02165
  84       10F 0        0.00797   0.00536   0.01143  -0.00088  -0.00721
  85       10F+1       -0.00860  -0.00026   0.00335   0.00346  -0.00084
  86       10F-1        0.00060   0.01002   0.00450   0.00527   0.00537
  87       10F+2        0.00007   0.00772  -0.01672  -0.00960   0.03933
  88       10F-2       -0.00875   0.00440  -0.00176  -0.00118   0.01112
  89       10F+3       -0.01250   0.00256  -0.00352   0.00071   0.01561
  90       10F-3       -0.00139   0.00178  -0.00385   0.00067   0.00800
  91 4   C  1S          0.01913   0.02153   0.01130   0.01302  -0.05626
  92        2S         -0.00929   0.02412  -0.07026  -0.05758   0.22962
  93        3S          0.00183   0.03078   0.01990  -0.02377   0.10673
  94        4S         -0.19689  -1.51242  -4.85366   0.50740  -3.17914
  95        5PX        -0.01656  -0.00463   0.00385  -0.03183  -0.01782
  96        5PY        -0.00833  -0.00793  -0.07884   0.08726   0.03463
  97        5PZ         0.01317   0.00335   0.04124   0.01385  -0.10672
  98        6PX        -0.07507  -0.06386   0.02911   0.03238   0.18561
  99        6PY        -0.03966   0.01497  -0.10665   0.26903   0.00419
 100        6PZ         0.02382   0.05106   0.18569   0.14480  -0.27588
 101        7PX        -0.22346  -0.43961   0.25459   0.55780   0.85794
 102        7PY        -0.36152   0.76704  -2.88870  -0.05280   0.36174
 103        7PZ         1.01378   2.57626  -0.22314  -0.29117   2.01955
 104        8D 0        0.01225   0.02581  -0.02315  -0.00554   0.00476
 105        8D+1        0.01045  -0.00890   0.00119   0.00986   0.00231
 106        8D-1       -0.00106   0.00548  -0.00812  -0.00678   0.01047
 107        8D+2       -0.00753  -0.00686  -0.00418   0.00863  -0.00901
 108        8D-2       -0.00958  -0.00220   0.00025   0.00026   0.00067
 109        9D 0       -0.07367  -0.13475   0.07008   0.14417  -0.02536
 110        9D+1       -0.11295   0.02647   0.00799   0.07136   0.17965
 111        9D-1        0.01684  -0.09654   0.03189   0.00355   0.03581
 112        9D+2        0.09616   0.15366  -0.07612  -0.00762  -0.03081
 113        9D-2        0.13562   0.03522  -0.00997  -0.00855  -0.02165
 114       10F 0       -0.00797  -0.00536   0.01143   0.00088   0.00721
 115       10F+1       -0.00860  -0.00026  -0.00335   0.00346  -0.00084
 116       10F-1        0.00060   0.01002  -0.00450   0.00527   0.00537
 117       10F+2       -0.00007  -0.00772  -0.01672   0.00960  -0.03933
 118       10F-2        0.00875  -0.00440  -0.00176   0.00118  -0.01112
 119       10F+3       -0.01250   0.00256   0.00352   0.00071   0.01561
 120       10F-3       -0.00139   0.00178   0.00385   0.00067   0.00800
 121 5   Si 1S         -0.00152  -0.00648   0.00000   0.01544  -0.03530
 122        2S          0.01659  -0.04437   0.00000  -0.15975   0.07600
 123        3S          0.01595  -0.25436   0.00000  -0.09009  -0.55799
 124        4S         -0.00773  -0.27390   0.00000   0.00226  -0.43688
 125        5S          1.05176   6.07485   0.00000  -1.12244   6.90947
 126        6PX         0.07278  -0.06593   0.00000   0.02432   0.03898
 127        6PY        -0.00923   0.01216   0.00000   0.04215   0.02928
 128        6PZ         0.00000   0.00000   0.05432   0.00000   0.00000
 129        7PX        -0.31261   0.11638   0.00000  -0.05236  -0.21649
 130        7PY         0.21944   0.39967   0.00000  -0.35086   0.13009
 131        7PZ         0.00000   0.00000  -0.53498   0.00000   0.00000
 132        8PX        -0.02543   0.03294   0.00000  -0.01058  -0.00764
 133        8PY        -0.00097  -0.03163   0.00000  -0.02320  -0.03682
 134        8PZ         0.00000   0.00000  -0.01967   0.00000   0.00000
 135        9PX         2.59908  -2.41357   0.00000   0.78860  -0.06985
 136        9PY         0.93750   3.08356   0.00000   1.75409   1.77449
 137        9PZ         0.00000   0.00000  -0.37870   0.00000   0.00000
 138       10D 0       -0.17028  -0.03766   0.00000   0.19127  -0.28981
 139       10D+1        0.00000   0.00000   0.05476   0.00000   0.00000
 140       10D-1        0.00000   0.00000   0.44065   0.00000   0.00000
 141       10D+2        0.30839  -1.41201   0.00000  -0.22760  -0.28488
 142       10D-2       -0.72922   0.13522   0.00000  -0.67654  -0.59760
 143       11D 0       -0.01676  -0.00638   0.00000   0.02231  -0.01104
 144       11D+1        0.00000   0.00000   0.01572   0.00000   0.00000
 145       11D-1        0.00000   0.00000  -0.04937   0.00000   0.00000
 146       11D+2        0.02577  -0.08794   0.00000   0.03312   0.00012
 147       11D-2       -0.07391   0.02372   0.00000  -0.02021  -0.03518
 148       12F 0        0.00000   0.00000   0.03113   0.00000   0.00000
 149       12F+1       -0.05214   0.04722   0.00000  -0.02984  -0.09492
 150       12F-1       -0.02293   0.10214   0.00000  -0.07261   0.11701
 151       12F+2        0.00000   0.00000  -0.00934   0.00000   0.00000
 152       12F-2        0.00000   0.00000  -0.00630   0.00000   0.00000
 153       12F+3       -0.00659   0.07358   0.00000  -0.05225   0.09621
 154       12F-3       -0.02897  -0.03368   0.00000  -0.02178  -0.16693
 155 6   H  1S          0.02081   0.00046  -0.03288   0.03148  -0.02357
 156        2S          0.15334  -0.15207   0.28002  -0.13337  -0.33326
 157        3S         -0.73588  -0.73190   0.00704  -0.46325  -0.91309
 158        4PX        -0.00682  -0.00338   0.00067  -0.00158  -0.00217
 159        4PY        -0.00093   0.00363  -0.00745  -0.00062  -0.00025
 160        4PZ        -0.00376   0.00668  -0.00602  -0.00372   0.00352
 161        5PX        -0.03132  -0.03797  -0.01037   0.15643   0.00423
 162        5PY        -0.06139  -0.02142   0.01935  -0.00084   0.03355
 163        5PZ         0.04646   0.03108  -0.07513   0.10350  -0.06834
 164        6D 0       -0.00753  -0.00647   0.00672   0.00216   0.00326
 165        6D+1        0.00224   0.00183  -0.00041  -0.00904   0.00335
 166        6D-1        0.00609   0.00113  -0.00015   0.00131  -0.00239
 167        6D+2        0.00286   0.00646  -0.00342  -0.00907   0.00375
 168        6D-2        0.00337  -0.00110   0.00190   0.00121  -0.00156
 169 7   H  1S         -0.02661  -0.00421  -0.01311   0.01146  -0.03132
 170        2S         -0.51845  -0.18174   0.51677   0.13656   0.60222
 171        3S         -0.08927  -1.58657  -0.01955   0.46227  -0.00098
 172        4PX        -0.00715   0.00549   0.00596   0.00232   0.01232
 173        4PY        -0.00536   0.00256  -0.00812  -0.00142   0.00585
 174        4PZ         0.01017   0.00625  -0.00922  -0.00115   0.00334
 175        5PX        -0.05751  -0.03971   0.06440  -0.03564   0.24429
 176        5PY         0.06600  -0.02429   0.04395   0.03440   0.01630
 177        5PZ         0.01531   0.04584  -0.05293  -0.03547  -0.22061
 178        6D 0        0.00102  -0.00499   0.00219   0.00378  -0.00437
 179        6D+1        0.00488   0.00698  -0.00561  -0.00438  -0.01984
 180        6D-1       -0.00389   0.00092  -0.00228  -0.00074  -0.00104
 181        6D+2       -0.00180   0.00362  -0.00076  -0.00508   0.01463
 182        6D-2        0.00381   0.00109  -0.00078  -0.00100   0.00703
 183 8   H  1S         -0.02661  -0.00421   0.01311   0.01146  -0.03132
 184        2S         -0.51845  -0.18174  -0.51677   0.13656   0.60222
 185        3S         -0.08927  -1.58657   0.01955   0.46227  -0.00098
 186        4PX        -0.00715   0.00549  -0.00596   0.00232   0.01232
 187        4PY        -0.00536   0.00256   0.00812  -0.00142   0.00585
 188        4PZ        -0.01017  -0.00625  -0.00922   0.00115  -0.00334
 189        5PX        -0.05751  -0.03971  -0.06440  -0.03564   0.24429
 190        5PY         0.06600  -0.02429  -0.04395   0.03440   0.01630
 191        5PZ        -0.01531  -0.04584  -0.05293   0.03547   0.22061
 192        6D 0        0.00102  -0.00499  -0.00219   0.00378  -0.00437
 193        6D+1       -0.00488  -0.00698  -0.00561   0.00438   0.01984
 194        6D-1        0.00389  -0.00092  -0.00228   0.00074   0.00104
 195        6D+2       -0.00180   0.00362   0.00076  -0.00508   0.01463
 196        6D-2        0.00381   0.00109   0.00078  -0.00100   0.00703
 197 9   H  1S          0.02081   0.00046   0.03288   0.03148  -0.02357
 198        2S          0.15334  -0.15207  -0.28002  -0.13337  -0.33326
 199        3S         -0.73588  -0.73190  -0.00704  -0.46325  -0.91309
 200        4PX        -0.00682  -0.00338  -0.00067  -0.00158  -0.00217
 201        4PY        -0.00093   0.00363   0.00745  -0.00062  -0.00025
 202        4PZ         0.00376  -0.00668  -0.00602   0.00372  -0.00352
 203        5PX        -0.03132  -0.03797   0.01037   0.15643   0.00423
 204        5PY        -0.06139  -0.02142  -0.01935  -0.00084   0.03355
 205        5PZ        -0.04646  -0.03108  -0.07513  -0.10350   0.06834
 206        6D 0       -0.00753  -0.00647  -0.00672   0.00216   0.00326
 207        6D+1       -0.00224  -0.00183  -0.00041   0.00904  -0.00335
 208        6D-1       -0.00609  -0.00113  -0.00015  -0.00131   0.00239
 209        6D+2        0.00286   0.00646   0.00342  -0.00907   0.00375
 210        6D-2        0.00337  -0.00110  -0.00190   0.00121  -0.00156
 211 10  H  1S         -0.00290   0.02157   0.03826   0.03986  -0.02879
 212        2S         -0.49764  -0.13593   0.29436   1.24517   0.71453
 213        3S         -0.07447  -0.40334  -0.14271  -0.01281   0.65042
 214        4PX        -0.00122   0.00033   0.00014   0.00052   0.00332
 215        4PY         0.00941  -0.00049   0.00238  -0.02474  -0.00972
 216        4PZ        -0.00162   0.00550   0.02357   0.00950   0.00122
 217        5PX        -0.01404  -0.00807   0.01104  -0.00732  -0.04317
 218        5PY         0.16942   0.16210  -0.06928  -0.24978  -0.32169
 219        5PZ        -0.10726  -0.10825  -0.06287   0.21413   0.21974
 220        6D 0        0.00274   0.00278  -0.00107  -0.00046  -0.00254
 221        6D+1       -0.00184  -0.00029   0.00102  -0.00075  -0.00190
 222        6D-1        0.01281   0.00853  -0.00563  -0.03121  -0.02512
 223        6D+2        0.01405   0.01116  -0.00906  -0.02362  -0.02338
 224        6D-2        0.00174   0.00027  -0.00051   0.00039  -0.00003
 225 11  H  1S         -0.00290   0.02157  -0.03826   0.03986  -0.02879
 226        2S         -0.49764  -0.13593  -0.29436   1.24517   0.71453
 227        3S         -0.07447  -0.40334   0.14271  -0.01281   0.65042
 228        4PX        -0.00122   0.00033  -0.00014   0.00052   0.00332
 229        4PY         0.00941  -0.00049  -0.00238  -0.02474  -0.00972
 230        4PZ         0.00162  -0.00550   0.02357  -0.00950  -0.00122
 231        5PX        -0.01404  -0.00807  -0.01104  -0.00732  -0.04317
 232        5PY         0.16942   0.16210   0.06928  -0.24978  -0.32169
 233        5PZ         0.10726   0.10825  -0.06287  -0.21413  -0.21974
 234        6D 0        0.00274   0.00278   0.00107  -0.00046  -0.00254
 235        6D+1        0.00184   0.00029   0.00102   0.00075   0.00190
 236        6D-1       -0.01281  -0.00853  -0.00563   0.03121   0.02512
 237        6D+2        0.01405   0.01116   0.00906  -0.02362  -0.02338
 238        6D-2        0.00174   0.00027   0.00051   0.00039  -0.00003
 239 12  H  1S         -0.02114  -0.00093   0.00000  -0.07626   0.01891
 240        2S          0.24218  -0.64236   0.00000  -0.13486  -0.03616
 241        3S          1.68310  -0.72307   0.00000   2.11218  -0.79288
 242        4PX        -0.00539   0.00579   0.00000  -0.01083   0.00540
 243        4PY        -0.00726   0.00012   0.00000  -0.01712   0.00382
 244        4PZ         0.00000   0.00000  -0.00188   0.00000   0.00000
 245        5PX         0.09084  -0.12496   0.00000   0.16399  -0.09944
 246        5PY         0.10100  -0.13751   0.00000   0.18771  -0.12706
 247        5PZ         0.00000   0.00000  -0.01356   0.00000   0.00000
 248        6D 0       -0.00199   0.00320   0.00000  -0.00295   0.00353
 249        6D+1        0.00000   0.00000   0.00233   0.00000   0.00000
 250        6D-1        0.00000   0.00000   0.00314   0.00000   0.00000
 251        6D+2        0.00122  -0.00544   0.00000   0.00243   0.00619
 252        6D-2        0.00624  -0.00760   0.00000   0.00436  -0.00555
 253 13  H  1S          0.04157  -0.05447   0.00000  -0.05669   0.04830
 254        2S         -0.25038  -0.11920   0.00000  -0.57885  -0.19315
 255        3S         -1.91947   1.61598   0.00000   0.51649  -1.58681
 256        4PX        -0.01374   0.01161   0.00000   0.00714  -0.01457
 257        4PY         0.00604  -0.00796   0.00000  -0.01214   0.00087
 258        4PZ         0.00000   0.00000  -0.00057   0.00000   0.00000
 259        5PX         0.19303  -0.11709   0.00000  -0.02036   0.31761
 260        5PY        -0.06311   0.03095   0.00000   0.09932  -0.10280
 261        5PZ         0.00000   0.00000  -0.00445   0.00000   0.00000
 262        6D 0        0.00174  -0.00228   0.00000   0.00102   0.00765
 263        6D+1        0.00000   0.00000  -0.00223   0.00000   0.00000
 264        6D-1        0.00000   0.00000   0.00054   0.00000   0.00000
 265        6D+2       -0.00386   0.00141   0.00000  -0.00801  -0.00994
 266        6D-2        0.00114  -0.00284   0.00000  -0.00311   0.00779
                          51        52        53        54        55
                           V         V         V         V         V
     Eigenvalues --     0.58643   0.59030   0.61256   0.61844   0.62939
   1 1   C  1S          0.00392   0.01432   0.05262   0.08451  -0.00487
   2        2S         -0.01524  -0.02593  -0.01813  -0.16255   0.02696
   3        3S         -0.00324   0.00074  -0.00042  -0.01840   0.03790
   4        4S          1.16013  -0.77600   0.59426  -4.09868  -1.50148
   5        5PX        -0.02546  -0.16907   0.00103   0.01552  -0.05079
   6        5PY        -0.04441  -0.00212  -0.12060  -0.04501   0.05019
   7        5PZ         0.01578   0.00294  -0.08114  -0.00379   0.06962
   8        6PX        -0.02768  -0.53188  -0.00386   0.04518  -0.11889
   9        6PY         0.15886  -0.08677   0.24197  -0.29820  -0.18908
  10        6PZ         0.10599   0.01777  -0.05490   0.22307  -0.32461
  11        7PX        -0.40889   1.90364   0.02270  -0.07137   0.83334
  12        7PY         0.51306   0.18701   2.41403   0.96247  -1.24405
  13        7PZ         0.44420   0.54615   0.67042   4.34079  -0.77196
  14        8D 0       -0.00042  -0.00000   0.00235  -0.00089   0.00711
  15        8D+1        0.01073   0.00832  -0.00019  -0.00359  -0.00580
  16        8D-1        0.00832   0.00073   0.00508   0.01419  -0.01148
  17        8D+2       -0.00486  -0.00372  -0.01437  -0.02056   0.00190
  18        8D-2       -0.01111   0.01250   0.00088  -0.00010   0.00682
  19        9D 0       -0.06306   0.00291  -0.02932  -0.04670   0.26791
  20        9D+1       -0.00187  -0.24187  -0.01447   0.07236   0.08310
  21        9D-1        0.19004  -0.10552   0.46673  -0.50724  -0.25533
  22        9D+2       -0.01683   0.02601  -0.21217  -0.05611   0.32701
  23        9D-2       -0.12473  -0.07509  -0.01973  -0.00838  -0.10821
  24       10F 0       -0.00756   0.00523  -0.00072   0.01755   0.00905
  25       10F+1       -0.00492   0.02748  -0.00149  -0.00421   0.00441
  26       10F-1        0.00583   0.00150   0.00197   0.01788  -0.00489
  27       10F+2       -0.01313   0.00280  -0.02095  -0.00280   0.02674
  28       10F-2        0.00201  -0.00628  -0.00094  -0.00117  -0.01063
  29       10F+3       -0.00445  -0.00607   0.00031   0.00111  -0.00052
  30       10F-3       -0.01545   0.00181  -0.02897   0.00905   0.01766
  31 2   C  1S          0.00392  -0.01432   0.05262  -0.08451   0.00487
  32        2S         -0.01524   0.02593  -0.01813   0.16255  -0.02696
  33        3S         -0.00324  -0.00074  -0.00042   0.01840  -0.03790
  34        4S          1.16013   0.77600   0.59426   4.09868   1.50148
  35        5PX        -0.02546   0.16907   0.00103  -0.01552   0.05079
  36        5PY        -0.04441   0.00212  -0.12060   0.04501  -0.05019
  37        5PZ        -0.01578   0.00294   0.08114  -0.00379   0.06962
  38        6PX        -0.02768   0.53188  -0.00386  -0.04518   0.11889
  39        6PY         0.15886   0.08677   0.24197   0.29820   0.18908
  40        6PZ        -0.10599   0.01777   0.05490   0.22307  -0.32461
  41        7PX        -0.40889  -1.90364   0.02270   0.07137  -0.83334
  42        7PY         0.51306  -0.18701   2.41403  -0.96247   1.24405
  43        7PZ        -0.44420   0.54615  -0.67042   4.34079  -0.77196
  44        8D 0       -0.00042   0.00000   0.00235   0.00089  -0.00711
  45        8D+1       -0.01073   0.00832   0.00019  -0.00359  -0.00580
  46        8D-1       -0.00832   0.00073  -0.00508   0.01419  -0.01148
  47        8D+2       -0.00486   0.00372  -0.01437   0.02056  -0.00190
  48        8D-2       -0.01111  -0.01250   0.00088   0.00010  -0.00682
  49        9D 0       -0.06306  -0.00291  -0.02932   0.04670  -0.26791
  50        9D+1        0.00187  -0.24187   0.01447   0.07236   0.08310
  51        9D-1       -0.19004  -0.10552  -0.46673  -0.50724  -0.25533
  52        9D+2       -0.01683  -0.02601  -0.21217   0.05611  -0.32701
  53        9D-2       -0.12473   0.07509  -0.01973   0.00838   0.10821
  54       10F 0        0.00756   0.00523   0.00072   0.01755   0.00905
  55       10F+1       -0.00492  -0.02748  -0.00149   0.00421  -0.00441
  56       10F-1        0.00583  -0.00150   0.00197  -0.01788   0.00489
  57       10F+2        0.01313   0.00280   0.02095  -0.00280   0.02674
  58       10F-2       -0.00201  -0.00628   0.00094  -0.00117  -0.01063
  59       10F+3       -0.00445   0.00607   0.00031  -0.00111   0.00052
  60       10F-3       -0.01545  -0.00181  -0.02897  -0.00905  -0.01766
  61 3   C  1S          0.02234   0.00919   0.00681   0.00170   0.03538
  62        2S         -0.06531  -0.02152   0.06207  -0.04259  -0.06086
  63        3S         -0.02550  -0.00971  -0.00296  -0.01622  -0.02355
  64        4S          0.63269   0.25493   1.70200  -0.31461   1.77459
  65        5PX        -0.05349   0.03155   0.01556  -0.04498  -0.16731
  66        5PY        -0.02502  -0.01509  -0.00808  -0.11582  -0.01185
  67        5PZ        -0.01627  -0.00183   0.03404  -0.05760   0.09075
  68        6PX         0.33478  -0.19358   0.00478   0.18020   0.35912
  69        6PY         0.01307  -0.06192   0.13746  -0.16170  -0.08230
  70        6PZ        -0.07473  -0.02538   0.03963   0.07850  -0.26814
  71        7PX         2.38764   0.06396  -0.35457   0.78988   2.81668
  72        7PY        -0.44886   0.19273   1.37668   2.20864  -0.21447
  73        7PZ         0.16852   0.06950   0.35525  -0.66880  -1.10233
  74        8D 0        0.00774  -0.00274  -0.00869   0.01325   0.00975
  75        8D+1       -0.00694   0.00447   0.00387  -0.00466  -0.03176
  76        8D-1        0.00396   0.00010  -0.00981  -0.01159  -0.00092
  77        8D+2        0.00107   0.00580  -0.00800  -0.00475   0.00614
  78        8D-2        0.01055  -0.00104  -0.00398  -0.00355  -0.00721
  79        9D 0        0.03613  -0.07027   0.05454  -0.13950   0.13589
  80        9D+1       -0.40522   0.31919  -0.03061  -0.21658  -0.65232
  81        9D-1       -0.03436   0.03065   0.23019   0.12619  -0.02281
  82        9D+2       -0.08798   0.02104   0.06149  -0.28976   0.19947
  83        9D-2       -0.05601   0.16486   0.04540  -0.04900   0.02218
  84       10F 0       -0.01118   0.00347   0.00098  -0.02037   0.00228
  85       10F+1        0.02177  -0.00863   0.00533   0.00364   0.03385
  86       10F-1       -0.00727  -0.00169   0.00800  -0.00524  -0.00662
  87       10F+2       -0.00932  -0.00553  -0.01304   0.00028  -0.02316
  88       10F-2        0.01449  -0.00333   0.00185   0.00687   0.00660
  89       10F+3        0.02843  -0.01157   0.00026   0.01320   0.02514
  90       10F-3        0.00521  -0.00711  -0.00854  -0.01118   0.00555
  91 4   C  1S          0.02234  -0.00919   0.00681  -0.00170  -0.03538
  92        2S         -0.06531   0.02152   0.06207   0.04259   0.06086
  93        3S         -0.02550   0.00971  -0.00296   0.01622   0.02355
  94        4S          0.63269  -0.25493   1.70200   0.31461  -1.77459
  95        5PX        -0.05349  -0.03155   0.01556   0.04498   0.16731
  96        5PY        -0.02502   0.01509  -0.00808   0.11582   0.01185
  97        5PZ         0.01627  -0.00183  -0.03404  -0.05760   0.09075
  98        6PX         0.33478   0.19358   0.00478  -0.18020  -0.35912
  99        6PY         0.01307   0.06192   0.13746   0.16170   0.08230
 100        6PZ         0.07473  -0.02538  -0.03963   0.07850  -0.26814
 101        7PX         2.38764  -0.06396  -0.35457  -0.78988  -2.81668
 102        7PY        -0.44886  -0.19273   1.37668  -2.20864   0.21447
 103        7PZ        -0.16852   0.06950  -0.35525  -0.66880  -1.10233
 104        8D 0        0.00774   0.00274  -0.00869  -0.01325  -0.00975
 105        8D+1        0.00694   0.00447  -0.00387  -0.00466  -0.03176
 106        8D-1       -0.00396   0.00010   0.00981  -0.01159  -0.00092
 107        8D+2        0.00107  -0.00580  -0.00800   0.00475  -0.00614
 108        8D-2        0.01055   0.00104  -0.00398   0.00355   0.00721
 109        9D 0        0.03613   0.07027   0.05454   0.13950  -0.13589
 110        9D+1        0.40522   0.31919   0.03061  -0.21658  -0.65232
 111        9D-1        0.03436   0.03065  -0.23019   0.12619  -0.02281
 112        9D+2       -0.08798  -0.02104   0.06149   0.28976  -0.19947
 113        9D-2       -0.05601  -0.16486   0.04540   0.04900  -0.02218
 114       10F 0        0.01118   0.00347  -0.00098  -0.02037   0.00228
 115       10F+1        0.02177   0.00863   0.00533  -0.00364  -0.03385
 116       10F-1       -0.00727   0.00169   0.00800   0.00524   0.00662
 117       10F+2        0.00932  -0.00553   0.01304   0.00028  -0.02316
 118       10F-2       -0.01449  -0.00333  -0.00185   0.00687   0.00660
 119       10F+3        0.02843   0.01157   0.00026  -0.01320  -0.02514
 120       10F-3        0.00521   0.00711  -0.00854   0.01118  -0.00555
 121 5   Si 1S          0.01302   0.00000  -0.01800   0.00000   0.00000
 122        2S         -0.02367   0.00000   0.02758   0.00000   0.00000
 123        3S          0.21310   0.00000  -0.30169   0.00000   0.00000
 124        4S          0.11529   0.00000  -0.20111   0.00000   0.00000
 125        5S         -2.22214   0.00000   3.08304   0.00000   0.00000
 126        6PX         0.06629   0.00000   0.01078   0.00000   0.00000
 127        6PY         0.01600   0.00000   0.00181   0.00000   0.00000
 128        6PZ         0.00000  -0.00225   0.00000  -0.00438  -0.02153
 129        7PX        -0.32226   0.00000  -0.08817   0.00000   0.00000
 130        7PY        -0.16902   0.00000   0.29992   0.00000   0.00000
 131        7PZ         0.00000   0.00095   0.00000  -0.47858   0.15930
 132        8PX        -0.01668   0.00000  -0.00115   0.00000   0.00000
 133        8PY         0.00599   0.00000  -0.01566   0.00000   0.00000
 134        8PZ         0.00000   0.00065   0.00000   0.01496  -0.00092
 135        9PX        -0.96210   0.00000   0.13551   0.00000   0.00000
 136        9PY        -0.32240   0.00000  -0.14292   0.00000   0.00000
 137        9PZ         0.00000  -0.03287   0.00000  -1.27821   0.25897
 138       10D 0       -0.51924   0.00000   0.54300   0.00000   0.00000
 139       10D+1        0.00000   0.26333   0.00000   0.29767   0.31280
 140       10D-1        0.00000   0.10565   0.00000  -0.12430   0.22066
 141       10D+2        0.04515   0.00000   0.10923   0.00000   0.00000
 142       10D-2       -0.33366   0.00000   0.19678   0.00000   0.00000
 143       11D 0        0.01292   0.00000   0.00618   0.00000   0.00000
 144       11D+1        0.00000   0.01971   0.00000   0.01484   0.00619
 145       11D-1        0.00000   0.00504   0.00000  -0.06838  -0.01810
 146       11D+2        0.00819   0.00000  -0.00237   0.00000   0.00000
 147       11D-2       -0.05413   0.00000  -0.01429   0.00000   0.00000
 148       12F 0        0.00000  -0.00873   0.00000   0.00375   0.02623
 149       12F+1       -0.12748   0.00000  -0.00731   0.00000   0.00000
 150       12F-1       -0.07955   0.00000   0.07980   0.00000   0.00000
 151       12F+2        0.00000  -0.00400   0.00000  -0.01534   0.00265
 152       12F-2        0.00000   0.01355   0.00000   0.00660   0.04631
 153       12F+3       -0.08586   0.00000   0.03591   0.00000   0.00000
 154       12F-3       -0.00896   0.00000  -0.05945   0.00000   0.00000
 155 6   H  1S          0.01410   0.00158  -0.00627  -0.00143  -0.07910
 156        2S         -1.06154  -0.21285  -0.23731   0.17834   1.42398
 157        3S         -0.63202  -0.53391   0.00325   0.56206   2.38528
 158        4PX         0.01487  -0.00131   0.00178  -0.00372  -0.00780
 159        4PY        -0.01051  -0.00294   0.00638  -0.00761  -0.00136
 160        4PZ         0.00090   0.00127   0.00065  -0.00350  -0.00105
 161        5PX         0.20826   0.12784   0.08140   0.03203  -0.59002
 162        5PY         0.11878   0.04230  -0.02229   0.04389   0.07318
 163        5PZ         0.30074   0.09229   0.04863  -0.04629  -0.64050
 164        6D 0       -0.00709   0.00017   0.00000   0.00199   0.01318
 165        6D+1       -0.02575  -0.00913  -0.00271   0.00629   0.04777
 166        6D-1       -0.00634  -0.00273   0.00402   0.00065  -0.00433
 167        6D+2       -0.00438  -0.00171  -0.00518  -0.00644   0.02122
 168        6D-2        0.00161  -0.00079  -0.00388   0.00312  -0.00495
 169 7   H  1S          0.01098  -0.01770   0.00872   0.02985   0.02860
 170        2S          1.22261   0.23960  -0.23873  -0.56244  -0.62089
 171        3S          0.70727   0.65768  -0.25486  -0.55362  -0.92033
 172        4PX         0.01407  -0.00079  -0.00249  -0.00095  -0.00797
 173        4PY         0.00665  -0.00041   0.00381  -0.00627   0.00399
 174        4PZ        -0.00373   0.00070  -0.00313  -0.00267  -0.01087
 175        5PX         0.25988   0.24519  -0.08348  -0.31906  -0.18587
 176        5PY        -0.05274   0.00250  -0.00617  -0.02547  -0.09900
 177        5PZ        -0.12313  -0.09722   0.08124   0.13938   0.23717
 178        6D 0       -0.00748  -0.00681  -0.00286   0.00450   0.00408
 179        6D+1       -0.01602  -0.01213   0.00150   0.01116   0.01600
 180        6D-1        0.00261  -0.00003   0.00420   0.00090   0.00527
 181        6D+2        0.01303   0.01112  -0.00652  -0.01539  -0.00499
 182        6D-2        0.00316   0.00025   0.00187  -0.00912  -0.00608
 183 8   H  1S          0.01098   0.01770   0.00872  -0.02985  -0.02860
 184        2S          1.22261  -0.23960  -0.23873   0.56244   0.62089
 185        3S          0.70727  -0.65768  -0.25486   0.55362   0.92033
 186        4PX         0.01407   0.00079  -0.00249   0.00095   0.00797
 187        4PY         0.00665   0.00041   0.00381   0.00627  -0.00399
 188        4PZ         0.00373   0.00070   0.00313  -0.00267  -0.01087
 189        5PX         0.25988  -0.24519  -0.08348   0.31906   0.18587
 190        5PY        -0.05274  -0.00250  -0.00617   0.02547   0.09900
 191        5PZ         0.12313  -0.09722  -0.08124   0.13938   0.23717
 192        6D 0       -0.00748   0.00681  -0.00286  -0.00450  -0.00408
 193        6D+1        0.01602  -0.01213  -0.00150   0.01116   0.01600
 194        6D-1       -0.00261  -0.00003  -0.00420   0.00090   0.00527
 195        6D+2        0.01303  -0.01112  -0.00652   0.01539   0.00499
 196        6D-2        0.00316  -0.00025   0.00187   0.00912   0.00608
 197 9   H  1S          0.01410  -0.00158  -0.00627   0.00143   0.07910
 198        2S         -1.06154   0.21285  -0.23731  -0.17834  -1.42398
 199        3S         -0.63202   0.53391   0.00325  -0.56206  -2.38528
 200        4PX         0.01487   0.00131   0.00178   0.00372   0.00780
 201        4PY        -0.01051   0.00294   0.00638   0.00761   0.00136
 202        4PZ        -0.00090   0.00127  -0.00065  -0.00350  -0.00105
 203        5PX         0.20826  -0.12784   0.08140  -0.03203   0.59002
 204        5PY         0.11878  -0.04230  -0.02229  -0.04389  -0.07318
 205        5PZ        -0.30074   0.09229  -0.04863  -0.04629  -0.64050
 206        6D 0       -0.00709  -0.00017   0.00000  -0.00199  -0.01318
 207        6D+1        0.02575  -0.00913   0.00271   0.00629   0.04777
 208        6D-1        0.00634  -0.00273  -0.00402   0.00065  -0.00433
 209        6D+2       -0.00438   0.00171  -0.00518   0.00644  -0.02122
 210        6D-2        0.00161   0.00079  -0.00388  -0.00312   0.00495
 211 10  H  1S          0.00285  -0.01097   0.05529  -0.07829   0.02198
 212        2S         -0.68687  -0.21716  -0.97247  -0.68704  -1.17034
 213        3S         -0.52518   0.23063  -2.25346   1.85304  -1.10183
 214        4PX         0.00501  -0.00420   0.00017  -0.00083  -0.00490
 215        4PY         0.00785   0.00388  -0.00067   0.01967   0.00866
 216        4PZ        -0.00364  -0.00247   0.00164  -0.00772  -0.00756
 217        5PX        -0.07048  -0.02942  -0.00567   0.01367   0.02905
 218        5PY         0.18971   0.03476   0.55757  -0.05627   0.40577
 219        5PZ        -0.12885  -0.01006  -0.30575   0.08389  -0.27426
 220        6D 0        0.00168   0.00110   0.00379   0.00446   0.00129
 221        6D+1       -0.00378  -0.00173   0.00020  -0.00083  -0.00532
 222        6D-1        0.01577   0.00293   0.02420   0.00128   0.02648
 223        6D+2        0.01231   0.00221   0.02215  -0.00095   0.01973
 224        6D-2       -0.00324   0.00981   0.00005  -0.00150   0.00152
 225 11  H  1S          0.00285   0.01097   0.05529   0.07829  -0.02198
 226        2S         -0.68687   0.21716  -0.97247   0.68704   1.17034
 227        3S         -0.52518  -0.23063  -2.25346  -1.85304   1.10183
 228        4PX         0.00501   0.00420   0.00017   0.00083   0.00490
 229        4PY         0.00785  -0.00388  -0.00067  -0.01967  -0.00866
 230        4PZ         0.00364  -0.00247  -0.00164  -0.00772  -0.00756
 231        5PX        -0.07048   0.02942  -0.00567  -0.01367  -0.02905
 232        5PY         0.18971  -0.03476   0.55757   0.05627  -0.40577
 233        5PZ         0.12885  -0.01006   0.30575   0.08389  -0.27426
 234        6D 0        0.00168  -0.00110   0.00379  -0.00446  -0.00129
 235        6D+1        0.00378  -0.00173  -0.00020  -0.00083  -0.00532
 236        6D-1       -0.01577   0.00293  -0.02420   0.00128   0.02648
 237        6D+2        0.01231  -0.00221   0.02215   0.00095  -0.01973
 238        6D-2       -0.00324  -0.00981   0.00005   0.00150  -0.00152
 239 12  H  1S         -0.03721   0.00000   0.00997   0.00000   0.00000
 240        2S         -0.27293   0.00000   0.04963   0.00000   0.00000
 241        3S          0.36027   0.00000  -0.76497   0.00000   0.00000
 242        4PX        -0.00519   0.00000   0.00726   0.00000   0.00000
 243        4PY        -0.00398   0.00000   0.00039   0.00000   0.00000
 244        4PZ         0.00000  -0.00126   0.00000  -0.00597  -0.00673
 245        5PX         0.11467   0.00000  -0.12162   0.00000   0.00000
 246        5PY         0.11492   0.00000  -0.01905   0.00000   0.00000
 247        5PZ         0.00000  -0.01627   0.00000   0.04680   0.06469
 248        6D 0       -0.00501   0.00000   0.00160   0.00000   0.00000
 249        6D+1        0.00000  -0.00137   0.00000   0.00009  -0.00058
 250        6D-1        0.00000  -0.00003   0.00000   0.00554   0.00236
 251        6D+2        0.00298   0.00000   0.00077   0.00000   0.00000
 252        6D-2        0.00760   0.00000  -0.00087   0.00000   0.00000
 253 13  H  1S          0.00842   0.00000   0.02291   0.00000   0.00000
 254        2S         -0.04397   0.00000   0.25851   0.00000   0.00000
 255        3S          0.65706   0.00000  -0.93414   0.00000   0.00000
 256        4PX         0.00182   0.00000  -0.00707   0.00000   0.00000
 257        4PY         0.00281   0.00000   0.00466   0.00000   0.00000
 258        4PZ         0.00000  -0.00013   0.00000  -0.00064   0.00524
 259        5PX         0.01242   0.00000   0.10224   0.00000   0.00000
 260        5PY        -0.05919   0.00000  -0.02702   0.00000   0.00000
 261        5PZ         0.00000   0.02385   0.00000   0.01420  -0.05385
 262        6D 0        0.00357   0.00000   0.00286   0.00000   0.00000
 263        6D+1        0.00000  -0.00039   0.00000  -0.00252  -0.00074
 264        6D-1        0.00000  -0.00049   0.00000   0.00207  -0.00210
 265        6D+2       -0.00393   0.00000  -0.00014   0.00000   0.00000
 266        6D-2       -0.00295   0.00000   0.00177   0.00000   0.00000
                          56        57        58        59        60
                           V         V         V         V         V
     Eigenvalues --     0.63887   0.63932   0.65479   0.65512   0.66095
   1 1   C  1S         -0.02417   0.00186   0.01759   0.04673  -0.01690
   2        2S          0.02740  -0.03097  -0.05118  -0.19908   0.06584
   3        3S         -0.02565  -0.01876  -0.04710  -0.12540   0.04329
   4        4S          2.26471   0.44482   3.61828   6.57350  -2.12067
   5        5PX        -0.05002   0.00879  -0.07684   0.00516   0.00230
   6        5PY        -0.02305  -0.00269  -0.00881   0.07926   0.02175
   7        5PZ        -0.07117   0.00006  -0.02178  -0.08861   0.04615
   8        6PX        -0.16297  -0.07633  -0.07421   0.00408  -0.00103
   9        6PY         0.28027   0.11979   0.15927   0.23079  -0.07229
  10        6PZ         0.19153   0.09016   0.01824   0.26929  -0.06573
  11        7PX         0.99051  -0.30007  -0.78842   0.02142  -0.04724
  12        7PY         0.23046  -0.08402   0.66282  -1.23090  -0.07361
  13        7PZ        -0.00420  -0.01381  -1.44091   2.69343  -1.08600
  14        8D 0       -0.00865  -0.00237   0.00059  -0.00782   0.00597
  15        8D+1       -0.00379   0.00375   0.00602  -0.00158   0.00286
  16        8D-1        0.00805   0.00342   0.00408   0.00162  -0.01007
  17        8D+2        0.00531  -0.00163  -0.00059  -0.01598   0.00832
  18        8D-2        0.00776  -0.00312  -0.01539   0.00018  -0.00004
  19        9D 0       -0.21595  -0.01429   0.04730  -0.07475  -0.02972
  20        9D+1        0.02462  -0.09279  -0.12464   0.00595  -0.00342
  21        9D-1        0.34738   0.05870   0.15599  -0.04627  -0.07898
  22        9D+2       -0.28115  -0.06089  -0.19414  -0.38924   0.12267
  23        9D-2       -0.09334   0.15434  -0.02917   0.02920   0.02642
  24       10F 0       -0.01013  -0.00993  -0.01890  -0.03890   0.01455
  25       10F+1        0.00455  -0.00588   0.01239   0.00181  -0.00105
  26       10F-1        0.00011  -0.00003  -0.00173   0.00667  -0.00282
  27       10F+2       -0.02428  -0.01127  -0.01642  -0.06510   0.01818
  28       10F-2       -0.00667   0.00924   0.00102  -0.00085   0.00116
  29       10F+3        0.00079   0.00066  -0.00625   0.00270  -0.00197
  30       10F-3       -0.00937  -0.00605  -0.01099  -0.00293   0.00923
  31 2   C  1S          0.02417   0.00186  -0.01759   0.04673  -0.01690
  32        2S         -0.02740  -0.03097   0.05118  -0.19908   0.06584
  33        3S          0.02565  -0.01876   0.04710  -0.12540   0.04329
  34        4S         -2.26471   0.44482  -3.61828   6.57350  -2.12067
  35        5PX         0.05002   0.00879   0.07684   0.00516   0.00230
  36        5PY         0.02305  -0.00269   0.00881   0.07926   0.02175
  37        5PZ        -0.07117  -0.00006  -0.02178   0.08861  -0.04615
  38        6PX         0.16297  -0.07633   0.07421   0.00408  -0.00103
  39        6PY        -0.28027   0.11979  -0.15927   0.23079  -0.07229
  40        6PZ         0.19153  -0.09016   0.01824  -0.26929   0.06573
  41        7PX        -0.99051  -0.30007   0.78842   0.02142  -0.04724
  42        7PY        -0.23046  -0.08402  -0.66282  -1.23090  -0.07361
  43        7PZ        -0.00420   0.01381  -1.44091  -2.69343   1.08600
  44        8D 0        0.00865  -0.00237  -0.00059  -0.00782   0.00597
  45        8D+1       -0.00379  -0.00375   0.00602   0.00158  -0.00286
  46        8D-1        0.00805  -0.00342   0.00408  -0.00162   0.01007
  47        8D+2       -0.00531  -0.00163   0.00059  -0.01598   0.00832
  48        8D-2       -0.00776  -0.00312   0.01539   0.00018  -0.00004
  49        9D 0        0.21595  -0.01429  -0.04730  -0.07475  -0.02972
  50        9D+1        0.02462   0.09279  -0.12464  -0.00595   0.00342
  51        9D-1        0.34738  -0.05870   0.15599   0.04627   0.07898
  52        9D+2        0.28115  -0.06089   0.19414  -0.38924   0.12267
  53        9D-2        0.09334   0.15434   0.02917   0.02920   0.02642
  54       10F 0       -0.01013   0.00993  -0.01890   0.03890  -0.01455
  55       10F+1       -0.00455  -0.00588  -0.01239   0.00181  -0.00105
  56       10F-1       -0.00011  -0.00003   0.00173   0.00667  -0.00282
  57       10F+2       -0.02428   0.01127  -0.01642   0.06510  -0.01818
  58       10F-2       -0.00667  -0.00924   0.00102   0.00085  -0.00116
  59       10F+3       -0.00079   0.00066   0.00625   0.00270  -0.00197
  60       10F-3        0.00937  -0.00605   0.01099  -0.00293   0.00923
  61 3   C  1S         -0.06097  -0.00530  -0.00284  -0.00079   0.07117
  62        2S          0.11417   0.00690   0.00831   0.06274  -0.13471
  63        3S          0.04908   0.00745   0.00339   0.06986  -0.08943
  64        4S         -2.18896  -0.39303  -0.54550  -3.37312   4.50538
  65        5PX        -0.13101  -0.20975  -0.01040   0.01312  -0.00134
  66        5PY         0.01875  -0.01542  -0.02960   0.14840  -0.01580
  67        5PZ        -0.08314  -0.00040  -0.00836   0.05523   0.16172
  68        6PX         0.28100   0.31816  -0.27080  -0.08402   0.03822
  69        6PY         0.23527   0.00541  -0.03758   0.03948  -0.09309
  70        6PZ         0.20813  -0.06969   0.20915  -0.12450  -0.22435
  71        7PX         2.54571   3.01821  -2.58865  -0.35576   0.43300
  72        7PY         0.16916   0.26051  -0.27764  -3.80422   0.99911
  73        7PZ         0.99363  -0.02234   0.71647  -0.50688  -1.51185
  74        8D 0       -0.00249   0.00527   0.00022  -0.00403  -0.00552
  75        8D+1       -0.01632  -0.03060  -0.00570  -0.00088  -0.00522
  76        8D-1        0.00263  -0.00353   0.00426   0.00217   0.00032
  77        8D+2       -0.02021  -0.00592  -0.00140  -0.00049   0.02281
  78        8D-2       -0.00548  -0.00907  -0.01053   0.00008   0.00255
  79        9D 0        0.15753   0.18401  -0.03625   0.08130   0.06742
  80        9D+1       -0.39177  -0.63390   0.22087   0.09593  -0.16064
  81        9D-1       -0.09125  -0.04763   0.00498  -0.32270   0.12619
  82        9D+2       -0.38764  -0.08924  -0.11298   0.35933   0.35599
  83        9D-2       -0.06893  -0.11860   0.08704   0.02328   0.03748
  84       10F 0       -0.01792  -0.00535   0.00292   0.01739   0.01683
  85       10F+1        0.00618   0.02045  -0.02817  -0.00265   0.02337
  86       10F-1        0.00953  -0.00148   0.00259  -0.01316  -0.00334
  87       10F+2        0.03372   0.00469   0.01176   0.02686  -0.05482
  88       10F-2        0.01402   0.01081  -0.01311  -0.00367  -0.00547
  89       10F+3        0.02501   0.02831  -0.01620  -0.00721  -0.00248
  90       10F-3        0.01580   0.00990  -0.00629   0.02180  -0.01479
  91 4   C  1S          0.06097  -0.00530   0.00284  -0.00079   0.07117
  92        2S         -0.11417   0.00690  -0.00831   0.06274  -0.13471
  93        3S         -0.04908   0.00745  -0.00339   0.06986  -0.08943
  94        4S          2.18896  -0.39303   0.54550  -3.37312   4.50538
  95        5PX         0.13101  -0.20975   0.01040   0.01312  -0.00134
  96        5PY        -0.01875  -0.01542   0.02960   0.14840  -0.01580
  97        5PZ        -0.08314   0.00040  -0.00836  -0.05523  -0.16172
  98        6PX        -0.28100   0.31816   0.27080  -0.08402   0.03822
  99        6PY        -0.23527   0.00541   0.03758   0.03948  -0.09309
 100        6PZ         0.20813   0.06969   0.20915   0.12450   0.22435
 101        7PX        -2.54571   3.01821   2.58865  -0.35576   0.43300
 102        7PY        -0.16916   0.26051   0.27764  -3.80422   0.99911
 103        7PZ         0.99363   0.02234   0.71647   0.50688   1.51185
 104        8D 0        0.00249   0.00527  -0.00022  -0.00403  -0.00552
 105        8D+1       -0.01632   0.03060  -0.00570   0.00088   0.00522
 106        8D-1        0.00263   0.00353   0.00426  -0.00217  -0.00032
 107        8D+2        0.02021  -0.00592   0.00140  -0.00049   0.02281
 108        8D-2        0.00548  -0.00907   0.01053   0.00008   0.00255
 109        9D 0       -0.15753   0.18401   0.03625   0.08130   0.06742
 110        9D+1       -0.39177   0.63390   0.22087  -0.09593   0.16064
 111        9D-1       -0.09125   0.04763   0.00498   0.32270  -0.12619
 112        9D+2        0.38764  -0.08924   0.11298   0.35933   0.35599
 113        9D-2        0.06893  -0.11860  -0.08704   0.02328   0.03748
 114       10F 0       -0.01792   0.00535   0.00292  -0.01739  -0.01683
 115       10F+1       -0.00618   0.02045   0.02817  -0.00265   0.02337
 116       10F-1       -0.00953  -0.00148  -0.00259  -0.01316  -0.00334
 117       10F+2        0.03372  -0.00469   0.01176  -0.02686   0.05482
 118       10F-2        0.01402  -0.01081  -0.01311   0.00367   0.00547
 119       10F+3       -0.02501   0.02831   0.01620  -0.00721  -0.00248
 120       10F-3       -0.01580   0.00990   0.00629   0.02180  -0.01479
 121 5   Si 1S          0.00000  -0.00108   0.00000   0.00863  -0.00574
 122        2S          0.00000  -0.00808   0.00000  -0.05047   0.05233
 123        3S          0.00000  -0.03384   0.00000   0.07379   0.01375
 124        4S          0.00000   0.04168   0.00000   0.20193   0.01207
 125        5S          0.00000  -0.20340   0.00000  -3.90365   0.43718
 126        6PX         0.00000  -0.04632   0.00000  -0.00824  -0.01105
 127        6PY         0.00000  -0.02937   0.00000  -0.01723   0.02421
 128        6PZ         0.01967   0.00000  -0.00952   0.00000   0.00000
 129        7PX         0.00000   0.08190   0.00000   0.06973   0.12728
 130        7PY         0.00000   0.18247   0.00000  -0.03131  -0.01680
 131        7PZ        -0.00067   0.00000   0.09665   0.00000   0.00000
 132        8PX         0.00000   0.02168   0.00000   0.00229  -0.00447
 133        8PY         0.00000   0.01024   0.00000   0.01799  -0.00622
 134        8PZ         0.00082   0.00000   0.00313   0.00000   0.00000
 135        9PX         0.00000  -1.95937   0.00000   0.19173  -0.62600
 136        9PY         0.00000  -1.02028   0.00000   0.64594   0.21153
 137        9PZ         0.25012   0.00000  -0.04924   0.00000   0.00000
 138       10D 0        0.00000   0.12760   0.00000  -0.18344   0.32722
 139       10D+1        0.45771   0.00000  -1.08160   0.00000   0.00000
 140       10D-1       -0.10053   0.00000  -0.00430   0.00000   0.00000
 141       10D+2        0.00000   0.17175   0.00000  -0.33686   0.24931
 142       10D-2        0.00000  -0.17072   0.00000   0.01492  -0.18387
 143       11D 0        0.00000  -0.01410   0.00000  -0.05883   0.04333
 144       11D+1       -0.00995   0.00000   0.06818   0.00000   0.00000
 145       11D-1        0.04753   0.00000   0.00816   0.00000   0.00000
 146       11D+2        0.00000  -0.02819   0.00000  -0.04068  -0.02905
 147       11D-2        0.00000   0.06327   0.00000  -0.00890   0.00262
 148       12F 0       -0.00658   0.00000  -0.02535   0.00000   0.00000
 149       12F+1        0.00000  -0.04533   0.00000   0.04362  -0.01665
 150       12F-1        0.00000  -0.01212   0.00000  -0.05706   0.00428
 151       12F+2       -0.01805   0.00000  -0.01328   0.00000   0.00000
 152       12F-2        0.02092   0.00000   0.02464   0.00000   0.00000
 153       12F+3        0.00000   0.00976   0.00000  -0.02458  -0.00758
 154       12F-3        0.00000   0.04694   0.00000   0.09368  -0.01603
 155 6   H  1S          0.01562   0.05167  -0.02616   0.00511   0.06191
 156        2S          0.36274  -0.88803  -1.43376   0.38395  -1.07533
 157        3S         -0.02124  -1.45495  -0.69861  -0.15132  -1.66026
 158        4PX        -0.01132   0.00820   0.01767  -0.00725  -0.00335
 159        4PY        -0.00003   0.00529  -0.00615  -0.01377   0.00405
 160        4PZ         0.00544  -0.00554   0.01451  -0.00318   0.00887
 161        5PX         0.09785   0.32204   0.18663   0.02818   0.61160
 162        5PY         0.02058  -0.07640   0.10206   0.11569  -0.05008
 163        5PZ        -0.04162   0.46135   0.15105  -0.03421   0.38691
 164        6D 0       -0.00214  -0.00908  -0.00295  -0.00161  -0.00525
 165        6D+1       -0.00022  -0.02998  -0.02207   0.00488  -0.03423
 166        6D-1       -0.00108   0.00290  -0.00610  -0.00123   0.00285
 167        6D+2       -0.00541  -0.00968  -0.00713  -0.00284  -0.02614
 168        6D-2       -0.00404   0.00220  -0.00109   0.00279  -0.00074
 169 7   H  1S          0.07608  -0.06596   0.02607   0.00596   0.05902
 170        2S         -1.32687   1.05310   0.95479  -0.09540  -0.57081
 171        3S         -2.35082   1.86898   0.43562  -0.45150  -1.14762
 172        4PX        -0.00579   0.00421   0.01090   0.00374   0.00601
 173        4PY        -0.00102  -0.00393   0.00459  -0.01589   0.00284
 174        4PZ         0.00273   0.00368  -0.00494  -0.00098   0.00778
 175        5PX        -0.71934   0.53732   0.09922  -0.14926  -0.54828
 176        5PY        -0.11520   0.14125  -0.05556   0.11586  -0.09211
 177        5PZ         0.39265  -0.37444   0.02675   0.04348   0.13224
 178        6D 0        0.00861  -0.00758  -0.00746  -0.00174   0.00587
 179        6D+1        0.03754  -0.03058  -0.00633   0.00372   0.01727
 180        6D-1        0.00609  -0.00644   0.00508  -0.00322   0.00446
 181        6D+2       -0.03101   0.01968   0.00217  -0.00516  -0.02840
 182        6D-2       -0.01012   0.00743  -0.00251  -0.00440  -0.00719
 183 8   H  1S         -0.07608  -0.06596  -0.02607   0.00596   0.05902
 184        2S          1.32687   1.05310  -0.95479  -0.09540  -0.57081
 185        3S          2.35082   1.86898  -0.43562  -0.45150  -1.14762
 186        4PX         0.00579   0.00421  -0.01090   0.00374   0.00601
 187        4PY         0.00102  -0.00393  -0.00459  -0.01589   0.00284
 188        4PZ         0.00273  -0.00368  -0.00494   0.00098  -0.00778
 189        5PX         0.71934   0.53732  -0.09922  -0.14926  -0.54828
 190        5PY         0.11520   0.14125   0.05556   0.11586  -0.09211
 191        5PZ         0.39265   0.37444   0.02675  -0.04348  -0.13224
 192        6D 0       -0.00861  -0.00758   0.00746  -0.00174   0.00587
 193        6D+1        0.03754   0.03058  -0.00633  -0.00372  -0.01727
 194        6D-1        0.00609   0.00644   0.00508   0.00322  -0.00446
 195        6D+2        0.03101   0.01968  -0.00217  -0.00516  -0.02840
 196        6D-2        0.01012   0.00743   0.00251  -0.00440  -0.00719
 197 9   H  1S         -0.01562   0.05167   0.02616   0.00511   0.06191
 198        2S         -0.36274  -0.88803   1.43376   0.38395  -1.07533
 199        3S          0.02124  -1.45495   0.69861  -0.15132  -1.66026
 200        4PX         0.01132   0.00820  -0.01767  -0.00725  -0.00335
 201        4PY         0.00003   0.00529   0.00615  -0.01377   0.00405
 202        4PZ         0.00544   0.00554   0.01451   0.00318  -0.00887
 203        5PX        -0.09785   0.32204  -0.18663   0.02818   0.61160
 204        5PY        -0.02058  -0.07640  -0.10206   0.11569  -0.05008
 205        5PZ        -0.04162  -0.46135   0.15105   0.03421  -0.38691
 206        6D 0        0.00214  -0.00908   0.00295  -0.00161  -0.00525
 207        6D+1       -0.00022   0.02998  -0.02207  -0.00488   0.03423
 208        6D-1       -0.00108  -0.00290  -0.00610   0.00123  -0.00285
 209        6D+2        0.00541  -0.00968   0.00713  -0.00284  -0.02614
 210        6D-2        0.00404   0.00220   0.00109   0.00279  -0.00074
 211 10  H  1S          0.00543  -0.00017  -0.01493   0.01303  -0.03261
 212        2S          1.19489  -0.28249   0.68044  -1.41111   0.39051
 213        3S          0.31036  -0.04432   0.34113  -0.41007   0.63723
 214        4PX        -0.00316  -0.00395  -0.00405  -0.00209  -0.00186
 215        4PY        -0.01152   0.00501  -0.00613   0.01199  -0.00276
 216        4PZ         0.00998  -0.00305   0.00207  -0.01873   0.00202
 217        5PX         0.01691   0.03466   0.11004   0.01153   0.02060
 218        5PY        -0.34545   0.09941  -0.24912   0.46506  -0.23758
 219        5PZ         0.19085  -0.06519   0.15301  -0.14544   0.10993
 220        6D 0       -0.00315   0.00015  -0.00086   0.00684  -0.00258
 221        6D+1       -0.00350  -0.00316   0.00483  -0.00039  -0.00046
 222        6D-1       -0.02255   0.00900  -0.01403   0.02705  -0.01128
 223        6D+2       -0.01869   0.00783  -0.01213   0.02999  -0.01197
 224        6D-2        0.00109   0.00100  -0.00128   0.00172  -0.00025
 225 11  H  1S         -0.00543  -0.00017   0.01493   0.01303  -0.03261
 226        2S         -1.19489  -0.28249  -0.68044  -1.41111   0.39051
 227        3S         -0.31036  -0.04432  -0.34113  -0.41007   0.63723
 228        4PX         0.00316  -0.00395   0.00405  -0.00209  -0.00186
 229        4PY         0.01152   0.00501   0.00613   0.01199  -0.00276
 230        4PZ         0.00998   0.00305   0.00207   0.01873  -0.00202
 231        5PX        -0.01691   0.03466  -0.11004   0.01153   0.02060
 232        5PY         0.34545   0.09941   0.24912   0.46506  -0.23758
 233        5PZ         0.19085   0.06519   0.15301   0.14544  -0.10993
 234        6D 0        0.00315   0.00015   0.00086   0.00684  -0.00258
 235        6D+1       -0.00350   0.00316   0.00483   0.00039   0.00046
 236        6D-1       -0.02255  -0.00900  -0.01403  -0.02705   0.01128
 237        6D+2        0.01869   0.00783   0.01213   0.02999  -0.01197
 238        6D-2       -0.00109   0.00100   0.00128   0.00172  -0.00025
 239 12  H  1S          0.00000   0.03476   0.00000  -0.00773   0.00258
 240        2S          0.00000   0.48106   0.00000   0.12031   0.25110
 241        3S          0.00000  -1.59332   0.00000   1.08298  -0.06838
 242        4PX         0.00000   0.00324   0.00000   0.00047  -0.00391
 243        4PY         0.00000   0.01178   0.00000  -0.00421   0.00365
 244        4PZ        -0.00519   0.00000   0.00423   0.00000   0.00000
 245        5PX         0.00000  -0.00540   0.00000   0.02824   0.04771
 246        5PY         0.00000  -0.06604   0.00000   0.07894  -0.01505
 247        5PZ         0.04877   0.00000   0.00209   0.00000   0.00000
 248        6D 0        0.00000   0.00089   0.00000   0.00214  -0.00047
 249        6D+1        0.00010   0.00000  -0.00168   0.00000   0.00000
 250        6D-1        0.00143   0.00000  -0.00813   0.00000   0.00000
 251        6D+2        0.00000  -0.00036   0.00000  -0.00755   0.00291
 252        6D-2        0.00000  -0.00016   0.00000   0.00278   0.00324
 253 13  H  1S          0.00000  -0.02633   0.00000  -0.00925  -0.00284
 254        2S          0.00000  -0.17924   0.00000   0.20955  -0.14229
 255        3S          0.00000   1.06137   0.00000   1.00242   0.52194
 256        4PX         0.00000   0.00244   0.00000   0.00312   0.00204
 257        4PY         0.00000  -0.01057   0.00000   0.00014  -0.00101
 258        4PZ         0.01150   0.00000  -0.01126   0.00000   0.00000
 259        5PX         0.00000  -0.02745   0.00000  -0.12622   0.01667
 260        5PY         0.00000   0.11955   0.00000   0.02141  -0.00776
 261        5PZ        -0.10903   0.00000   0.05309   0.00000   0.00000
 262        6D 0        0.00000  -0.00121   0.00000  -0.00135   0.00112
 263        6D+1        0.00142   0.00000  -0.00528   0.00000   0.00000
 264        6D-1       -0.00332   0.00000   0.00838   0.00000   0.00000
 265        6D+2        0.00000   0.00226   0.00000   0.00652  -0.00149
 266        6D-2        0.00000  -0.00374   0.00000  -0.00440  -0.00116
                          61        62        63        64        65
                           V         V         V         V         V
     Eigenvalues --     0.66242   0.74143   0.76037   0.78827   0.78960
   1 1   C  1S          0.03658   0.04923  -0.00292  -0.01183  -0.00108
   2        2S         -0.10553  -0.21183   0.05008   0.13285  -0.10959
   3        3S         -0.14593  -0.18640   0.03788   0.06301  -0.08253
   4        4S          8.33563  12.31313  -0.73569   0.16644   0.13497
   5        5PX         0.01239   0.01736  -0.00236   0.02460  -0.00128
   6        5PY        -0.08110   0.16286  -0.00278  -0.03340   0.13116
   7        5PZ        -0.07008   0.03112   0.00268   0.00787  -0.11482
   8        6PX        -0.00521   0.01205   0.02923   0.17532  -0.00979
   9        6PY         0.46884   0.43911  -0.10913  -0.18583   0.18989
  10        6PZ         0.24693  -0.33503  -0.19748  -0.24631   0.16980
  11        7PX         0.24749   0.10820   0.23219  -0.25199  -0.01246
  12        7PY         3.49940  -4.80852   0.70128   1.56702  -5.76580
  13        7PZ        -1.02656  -2.67958   0.36684   1.09821   3.99410
  14        8D 0       -0.00045   0.02580   0.00587   0.01483  -0.00592
  15        8D+1       -0.00099  -0.00050  -0.01059   0.00116   0.00270
  16        8D-1        0.01364  -0.00073  -0.00362  -0.01702   0.00488
  17        8D+2        0.00527   0.00883   0.00194   0.00678  -0.00289
  18        8D-2        0.00443   0.00188   0.00127  -0.00165  -0.00029
  19        9D 0       -0.05337   0.46166   0.00141   0.03584  -0.37508
  20        9D+1       -0.00411  -0.00445   0.00003   0.17727  -0.05759
  21        9D-1        0.72188   0.11352  -0.04813   0.08952  -0.18289
  22        9D+2       -0.72213  -0.41111   0.10706   0.09366  -0.34642
  23        9D-2       -0.02593   0.02788  -0.03038   0.08458   0.01483
  24       10F 0       -0.05222  -0.07657   0.01361   0.02130  -0.00653
  25       10F+1       -0.00023  -0.00127  -0.00033   0.00692   0.00263
  26       10F-1        0.00019  -0.00561   0.00211   0.00514  -0.00109
  27       10F+2       -0.05443  -0.03864   0.01315   0.01645  -0.02775
  28       10F-2       -0.00303  -0.00059   0.00310  -0.00851   0.00019
  29       10F+3        0.00563   0.00319  -0.00060  -0.00062   0.00172
  30       10F-3       -0.04632   0.00067   0.00093  -0.00619   0.01862
  31 2   C  1S         -0.03658  -0.04923  -0.00292  -0.01183   0.00108
  32        2S          0.10553   0.21183   0.05008   0.13285   0.10959
  33        3S          0.14593   0.18640   0.03788   0.06301   0.08253
  34        4S         -8.33563 -12.31313  -0.73569   0.16644  -0.13497
  35        5PX        -0.01239  -0.01736  -0.00236   0.02460   0.00128
  36        5PY         0.08110  -0.16286  -0.00278  -0.03340  -0.13116
  37        5PZ        -0.07008   0.03112  -0.00268  -0.00787  -0.11482
  38        6PX         0.00521  -0.01205   0.02923   0.17532   0.00979
  39        6PY        -0.46884  -0.43911  -0.10913  -0.18583  -0.18989
  40        6PZ         0.24693  -0.33503   0.19748   0.24631   0.16980
  41        7PX        -0.24749  -0.10820   0.23219  -0.25199   0.01246
  42        7PY        -3.49940   4.80852   0.70128   1.56702   5.76580
  43        7PZ        -1.02656  -2.67958  -0.36684  -1.09821   3.99410
  44        8D 0        0.00045  -0.02580   0.00587   0.01483   0.00592
  45        8D+1       -0.00099  -0.00050   0.01059  -0.00116   0.00270
  46        8D-1        0.01364  -0.00073   0.00362   0.01702   0.00488
  47        8D+2       -0.00527  -0.00883   0.00194   0.00678   0.00289
  48        8D-2       -0.00443  -0.00188   0.00127  -0.00165   0.00029
  49        9D 0        0.05337  -0.46166   0.00141   0.03584   0.37508
  50        9D+1       -0.00411  -0.00445  -0.00003  -0.17727  -0.05759
  51        9D-1        0.72188   0.11352   0.04813  -0.08952  -0.18289
  52        9D+2        0.72213   0.41111   0.10706   0.09366   0.34642
  53        9D-2        0.02593  -0.02788  -0.03038   0.08458  -0.01483
  54       10F 0       -0.05222  -0.07657  -0.01361  -0.02130  -0.00653
  55       10F+1        0.00023   0.00127  -0.00033   0.00692  -0.00263
  56       10F-1       -0.00019   0.00561   0.00211   0.00514   0.00109
  57       10F+2       -0.05443  -0.03864  -0.01315  -0.01645  -0.02775
  58       10F-2       -0.00303  -0.00059  -0.00310   0.00851   0.00019
  59       10F+3       -0.00563  -0.00319  -0.00060  -0.00062  -0.00172
  60       10F-3        0.04632  -0.00067   0.00093  -0.00619  -0.01862
  61 3   C  1S          0.03968  -0.00023   0.00072   0.00702   0.05820
  62        2S         -0.09420   0.00686  -0.00046  -0.04292  -0.24937
  63        3S         -0.05754  -0.04387  -0.01581  -0.03897  -0.12967
  64        4S          1.05294   4.96715   1.22791   1.64091   6.22100
  65        5PX        -0.02537   0.01914  -0.02829   0.02049   0.00224
  66        5PY         0.00957  -0.13531  -0.01474  -0.03643  -0.04997
  67        5PZ         0.05957  -0.04269   0.03740  -0.01045  -0.03889
  68        6PX         0.10664   0.05657   0.04016  -0.02787  -0.09840
  69        6PY         0.08798   0.00460   0.01811   0.13163   0.34241
  70        6PZ        -0.03323   0.29312  -0.02800  -0.03485  -0.32559
  71        7PX         0.97871   0.34049  -1.63743   0.13946  -0.44473
  72        7PY         0.18645   2.22370  -0.05636  -0.65344   3.12231
  73        7PZ        -0.51274   2.47795   0.65661   0.24242   0.31243
  74        8D 0       -0.00226   0.00482   0.00009  -0.00130  -0.00191
  75        8D+1       -0.00670   0.00344  -0.00783   0.00606  -0.00351
  76        8D-1        0.01247   0.01730   0.00203   0.00706   0.00320
  77        8D+2        0.01693  -0.00688   0.00667  -0.00373  -0.00046
  78        8D-2        0.00583   0.00387  -0.00437   0.01274   0.00630
  79        9D 0        0.18805   0.01196  -0.03778  -0.07530  -0.05351
  80        9D+1       -0.18219  -0.01309  -0.15093  -0.06999   0.00768
  81        9D-1        0.01751   0.30559   0.05158   0.07862   0.27911
  82        9D+2        0.08255  -0.24591  -0.09022  -0.07569  -0.03212
  83        9D-2       -0.02209  -0.00863   0.13338  -0.02698   0.03109
  84       10F 0        0.00670  -0.00339  -0.00206  -0.00758   0.00135
  85       10F+1        0.01606   0.00186  -0.00355   0.00389   0.00912
  86       10F-1        0.01069   0.01050  -0.00014   0.00039   0.00651
  87       10F+2       -0.02385  -0.00757  -0.01672  -0.01784  -0.05878
  88       10F-2        0.00212   0.00257   0.01099   0.00557  -0.00083
  89       10F+3        0.00503   0.00213   0.00672  -0.00742  -0.00631
  90       10F-3       -0.00026  -0.00836  -0.00591  -0.01109  -0.01623
  91 4   C  1S         -0.03968   0.00023   0.00072   0.00702  -0.05820
  92        2S          0.09420  -0.00686  -0.00046  -0.04292   0.24937
  93        3S          0.05754   0.04387  -0.01581  -0.03897   0.12967
  94        4S         -1.05294  -4.96715   1.22791   1.64091  -6.22100
  95        5PX         0.02537  -0.01914  -0.02829   0.02049  -0.00224
  96        5PY        -0.00957   0.13531  -0.01474  -0.03643   0.04997
  97        5PZ         0.05957  -0.04269  -0.03740   0.01045  -0.03889
  98        6PX        -0.10664  -0.05657   0.04016  -0.02787   0.09840
  99        6PY        -0.08798  -0.00460   0.01811   0.13163  -0.34241
 100        6PZ        -0.03323   0.29312   0.02800   0.03485  -0.32559
 101        7PX        -0.97871  -0.34049  -1.63743   0.13946   0.44473
 102        7PY        -0.18645  -2.22370  -0.05636  -0.65344  -3.12231
 103        7PZ        -0.51274   2.47795  -0.65661  -0.24242   0.31243
 104        8D 0        0.00226  -0.00482   0.00009  -0.00130   0.00191
 105        8D+1       -0.00670   0.00344   0.00783  -0.00606  -0.00351
 106        8D-1        0.01247   0.01730  -0.00203  -0.00706   0.00320
 107        8D+2       -0.01693   0.00688   0.00667  -0.00373   0.00046
 108        8D-2       -0.00583  -0.00387  -0.00437   0.01274  -0.00630
 109        9D 0       -0.18805  -0.01196  -0.03778  -0.07530   0.05351
 110        9D+1       -0.18219  -0.01309   0.15093   0.06999   0.00768
 111        9D-1        0.01751   0.30559  -0.05158  -0.07862   0.27911
 112        9D+2       -0.08255   0.24591  -0.09022  -0.07569   0.03212
 113        9D-2        0.02209   0.00863   0.13338  -0.02698  -0.03109
 114       10F 0        0.00670  -0.00339   0.00206   0.00758   0.00135
 115       10F+1       -0.01606  -0.00186  -0.00355   0.00389  -0.00912
 116       10F-1       -0.01069  -0.01050  -0.00014   0.00039  -0.00651
 117       10F+2       -0.02385  -0.00757   0.01672   0.01784  -0.05878
 118       10F-2        0.00212   0.00257  -0.01099  -0.00557  -0.00083
 119       10F+3       -0.00503  -0.00213   0.00672  -0.00742   0.00631
 120       10F-3        0.00026   0.00836  -0.00591  -0.01109   0.01623
 121 5   Si 1S          0.00000   0.00000  -0.00249  -0.00437   0.00000
 122        2S          0.00000   0.00000  -0.00416  -0.03422   0.00000
 123        3S          0.00000   0.00000  -0.06914  -0.18780   0.00000
 124        4S          0.00000   0.00000  -0.08121  -0.19083   0.00000
 125        5S          0.00000   0.00000  -0.12643   0.38891   0.00000
 126        6PX         0.00000   0.00000   0.00168  -0.05444   0.00000
 127        6PY         0.00000   0.00000   0.01557  -0.03592   0.00000
 128        6PZ         0.01023  -0.06832   0.00000   0.00000   0.06300
 129        7PX         0.00000   0.00000  -0.54183   0.27673   0.00000
 130        7PY         0.00000   0.00000  -0.36883  -0.14975   0.00000
 131        7PZ         0.09017   0.47735   0.00000   0.00000  -0.36273
 132        8PX         0.00000   0.00000   0.04518   0.02241   0.00000
 133        8PY         0.00000   0.00000   0.00534   0.02157   0.00000
 134        8PZ        -0.00323   0.02644   0.00000   0.00000  -0.01974
 135        9PX         0.00000   0.00000   0.47041   0.34684   0.00000
 136        9PY         0.00000   0.00000  -0.09348   0.64359   0.00000
 137        9PZ        -0.15320   0.22880   0.00000   0.00000  -1.91173
 138       10D 0        0.00000   0.00000  -0.22293  -1.13227   0.00000
 139       10D+1        0.27822  -0.02378   0.00000   0.00000   0.27061
 140       10D-1       -0.07961   0.86321   0.00000   0.00000  -1.34174
 141       10D+2        0.00000   0.00000  -0.87683  -0.23547   0.00000
 142       10D-2        0.00000   0.00000   1.84289  -0.48147   0.00000
 143       11D 0        0.00000   0.00000   0.02753   0.00715   0.00000
 144       11D+1       -0.02654  -0.00301   0.00000   0.00000   0.00476
 145       11D-1        0.04742   0.00174   0.00000   0.00000   0.04772
 146       11D+2        0.00000   0.00000   0.04289   0.04383   0.00000
 147       11D-2        0.00000   0.00000  -0.02287   0.02317   0.00000
 148       12F 0        0.02281  -0.02267   0.00000   0.00000  -0.03341
 149       12F+1        0.00000   0.00000   0.02691   0.01061   0.00000
 150       12F-1        0.00000   0.00000   0.03636   0.04201   0.00000
 151       12F+2       -0.02770   0.04317   0.00000   0.00000  -0.06134
 152       12F-2       -0.00375   0.00539   0.00000   0.00000   0.01692
 153       12F+3        0.00000   0.00000   0.06564   0.09449   0.00000
 154       12F-3        0.00000   0.00000  -0.01079  -0.09511   0.00000
 155 6   H  1S         -0.04712  -0.00601   0.03764  -0.01955  -0.01461
 156        2S          0.61474   0.03870   0.30953  -0.28655   0.44683
 157        3S          1.07802  -0.56014   0.41957  -0.21063   0.38816
 158        4PX         0.00135  -0.00522  -0.00539   0.00562  -0.00325
 159        4PY        -0.00100  -0.00652  -0.01224  -0.01126   0.00320
 160        4PZ        -0.00022   0.00624  -0.00588   0.00694  -0.00548
 161        5PX        -0.37373   0.11926   0.13689  -0.01347  -0.20528
 162        5PY         0.02060   0.09917   0.13170   0.13637  -0.03565
 163        5PZ        -0.23039  -0.01127   0.16587  -0.02511  -0.21447
 164        6D 0       -0.00162  -0.00118  -0.00115   0.00010   0.00500
 165        6D+1        0.02035  -0.00710  -0.01067  -0.00007   0.01855
 166        6D-1       -0.00204   0.00124  -0.00157  -0.00467  -0.00132
 167        6D+2        0.01426  -0.00818  -0.00430  -0.00253   0.01385
 168        6D-2       -0.00358  -0.00095  -0.00071  -0.00350   0.00178
 169 7   H  1S         -0.04045  -0.01947  -0.01911   0.00290  -0.00484
 170        2S         -0.23252  -0.21693  -0.49205  -0.22336   0.68705
 171        3S          0.15173  -0.64313  -0.36717  -0.11012   0.56755
 172        4PX        -0.00906   0.00099  -0.00765   0.00058   0.00709
 173        4PY        -0.01009  -0.01080   0.00932   0.00699  -0.00686
 174        4PZ        -0.00041   0.00965   0.00304  -0.00194  -0.00766
 175        5PX         0.16087  -0.13104   0.00751  -0.07249   0.29428
 176        5PY         0.12639   0.14909  -0.08364  -0.16845   0.18408
 177        5PZ         0.02626  -0.08121  -0.07264   0.08908  -0.12018
 178        6D 0       -0.00390   0.00300  -0.00086  -0.00005  -0.00620
 179        6D+1        0.00082   0.00338  -0.00108   0.01005  -0.01545
 180        6D-1       -0.00444   0.00048   0.00060   0.00742  -0.00911
 181        6D+2        0.00763  -0.00941  -0.00410  -0.00167   0.01864
 182        6D-2        0.00662  -0.00100   0.00226  -0.00535   0.00799
 183 8   H  1S          0.04045   0.01947  -0.01911   0.00290   0.00484
 184        2S          0.23252   0.21693  -0.49205  -0.22336  -0.68705
 185        3S         -0.15173   0.64313  -0.36717  -0.11012  -0.56755
 186        4PX         0.00906  -0.00099  -0.00765   0.00058  -0.00709
 187        4PY         0.01009   0.01080   0.00932   0.00699   0.00686
 188        4PZ        -0.00041   0.00965  -0.00304   0.00194  -0.00766
 189        5PX        -0.16087   0.13104   0.00751  -0.07249  -0.29428
 190        5PY        -0.12639  -0.14909  -0.08364  -0.16845  -0.18408
 191        5PZ         0.02626  -0.08121   0.07264  -0.08908  -0.12018
 192        6D 0        0.00390  -0.00300  -0.00086  -0.00005   0.00620
 193        6D+1        0.00082   0.00338   0.00108  -0.01005  -0.01545
 194        6D-1       -0.00444   0.00048  -0.00060  -0.00742  -0.00911
 195        6D+2       -0.00763   0.00941  -0.00410  -0.00167  -0.01864
 196        6D-2       -0.00662   0.00100   0.00226  -0.00535  -0.00799
 197 9   H  1S          0.04712   0.00601   0.03764  -0.01955   0.01461
 198        2S         -0.61474  -0.03870   0.30953  -0.28655  -0.44683
 199        3S         -1.07802   0.56014   0.41957  -0.21063  -0.38816
 200        4PX        -0.00135   0.00522  -0.00539   0.00562   0.00325
 201        4PY         0.00100   0.00652  -0.01224  -0.01126  -0.00320
 202        4PZ        -0.00022   0.00624   0.00588  -0.00694  -0.00548
 203        5PX         0.37373  -0.11926   0.13689  -0.01347   0.20528
 204        5PY        -0.02060  -0.09917   0.13170   0.13637   0.03565
 205        5PZ        -0.23039  -0.01127  -0.16587   0.02511  -0.21447
 206        6D 0        0.00162   0.00118  -0.00115   0.00010  -0.00500
 207        6D+1        0.02035  -0.00710   0.01067   0.00007   0.01855
 208        6D-1       -0.00204   0.00124   0.00157   0.00467  -0.00132
 209        6D+2       -0.01426   0.00818  -0.00430  -0.00253  -0.01385
 210        6D-2        0.00358   0.00095  -0.00071  -0.00350  -0.00178
 211 10  H  1S         -0.03944   0.01123  -0.00921  -0.03726  -0.01385
 212        2S          2.91705   0.92844   0.15610  -0.38977  -0.25420
 213        3S          2.30773  -1.68637  -0.26219  -0.84904  -0.94546
 214        4PX         0.00082   0.00203   0.00604  -0.01062   0.00243
 215        4PY        -0.02770  -0.01169  -0.00408   0.00278   0.00391
 216        4PZ         0.01394   0.01387   0.00045   0.00070   0.01166
 217        5PX        -0.01535  -0.03042  -0.07229   0.11494  -0.03554
 218        5PY        -0.87881  -0.27569  -0.13000  -0.16096  -0.10210
 219        5PZ         0.55942   0.06379   0.09340   0.06403  -0.03350
 220        6D 0       -0.00188  -0.00037  -0.00018   0.00018   0.00418
 221        6D+1       -0.00111  -0.00022   0.00102  -0.00352   0.00048
 222        6D-1       -0.04976  -0.01284  -0.00959  -0.01278  -0.00769
 223        6D+2       -0.03938  -0.01740  -0.01031  -0.01261  -0.00543
 224        6D-2        0.00046   0.00005   0.00273   0.00347   0.00199
 225 11  H  1S          0.03944  -0.01123  -0.00921  -0.03726   0.01385
 226        2S         -2.91705  -0.92844   0.15610  -0.38977   0.25420
 227        3S         -2.30773   1.68637  -0.26219  -0.84904   0.94546
 228        4PX        -0.00082  -0.00203   0.00604  -0.01062  -0.00243
 229        4PY         0.02770   0.01169  -0.00408   0.00278  -0.00391
 230        4PZ         0.01394   0.01387  -0.00045  -0.00070   0.01166
 231        5PX         0.01535   0.03042  -0.07229   0.11494   0.03554
 232        5PY         0.87881   0.27569  -0.13000  -0.16096   0.10210
 233        5PZ         0.55942   0.06379  -0.09340  -0.06403  -0.03350
 234        6D 0        0.00188   0.00037  -0.00018   0.00018  -0.00418
 235        6D+1       -0.00111  -0.00022  -0.00102   0.00352   0.00048
 236        6D-1       -0.04976  -0.01284   0.00959   0.01278  -0.00769
 237        6D+2        0.03938   0.01740  -0.01031  -0.01261   0.00543
 238        6D-2       -0.00046  -0.00005   0.00273   0.00347  -0.00199
 239 12  H  1S          0.00000   0.00000   0.00144   0.02418   0.00000
 240        2S          0.00000   0.00000  -1.42937   0.01535   0.00000
 241        3S          0.00000   0.00000  -0.02994   0.00305   0.00000
 242        4PX         0.00000   0.00000  -0.00947  -0.00767   0.00000
 243        4PY         0.00000   0.00000   0.00494   0.01251   0.00000
 244        4PZ        -0.00034  -0.00512   0.00000   0.00000   0.00316
 245        5PX         0.00000   0.00000   0.00926   0.03691   0.00000
 246        5PY         0.00000   0.00000  -0.23967  -0.28090   0.00000
 247        5PZ         0.00078   0.02803   0.00000   0.00000   0.00004
 248        6D 0        0.00000   0.00000   0.01063   0.00266   0.00000
 249        6D+1        0.00015   0.00166   0.00000   0.00000  -0.00141
 250        6D-1        0.00208   0.00413   0.00000   0.00000  -0.00979
 251        6D+2        0.00000   0.00000  -0.00167   0.00577   0.00000
 252        6D-2        0.00000   0.00000  -0.01040  -0.01072   0.00000
 253 13  H  1S          0.00000   0.00000  -0.00327  -0.03050   0.00000
 254        2S          0.00000   0.00000   1.04493  -0.90354   0.00000
 255        3S          0.00000   0.00000  -0.03821   0.00033   0.00000
 256        4PX         0.00000   0.00000  -0.00276   0.00056   0.00000
 257        4PY         0.00000   0.00000  -0.00773  -0.02389   0.00000
 258        4PZ         0.00751   0.00185   0.00000   0.00000   0.02060
 259        5PX         0.00000   0.00000  -0.04509   0.11178   0.00000
 260        5PY         0.00000   0.00000   0.17135   0.22100   0.00000
 261        5PZ        -0.06510  -0.03477   0.00000   0.00000  -0.21885
 262        6D 0        0.00000   0.00000  -0.00816   0.00317   0.00000
 263        6D+1        0.00066   0.00027   0.00000   0.00000   0.00400
 264        6D-1       -0.00220   0.00102   0.00000   0.00000  -0.00622
 265        6D+2        0.00000   0.00000   0.00569  -0.01033   0.00000
 266        6D-2        0.00000   0.00000   0.00260   0.00347   0.00000
                          66        67        68        69        70
                           V         V         V         V         V
     Eigenvalues --     0.79802   0.83098   0.83297   0.85207   0.92389
   1 1   C  1S         -0.01066   0.02795  -0.02991   0.04852  -0.00591
   2        2S          0.16315  -0.06896   0.13412  -0.17845   0.06244
   3        3S          0.07124  -0.03829   0.03305  -0.15097   0.02420
   4        4S          0.69600   3.74324  -0.88114   9.74221   0.05532
   5        5PX        -0.01548   0.01154  -0.01034  -0.01904   0.00430
   6        5PY        -0.02592  -0.06625   0.01722   0.01494   0.00608
   7        5PZ         0.01104   0.13984   0.06392   0.16899   0.02227
   8        6PX        -0.14187   0.01221  -0.03100  -0.04825  -0.02752
   9        6PY        -0.17497   0.05672  -0.18188   0.22501  -0.06168
  10        6PZ        -0.25964  -0.11163  -0.06067  -0.15358  -0.07644
  11        7PX         0.23352   0.14987   0.04259  -0.08500  -0.47445
  12        7PY         1.12512   0.28322   0.59134  -1.03727   0.20371
  13        7PZ         1.23610  -3.32083   0.41428  -4.53057   0.31376
  14        8D 0        0.01992   0.02523  -0.00181   0.03827   0.00479
  15        8D+1       -0.00548   0.00915  -0.00075  -0.00581   0.01278
  16        8D-1       -0.01816   0.00402  -0.00255   0.00209  -0.00282
  17        8D+2        0.00829   0.00528   0.00722   0.01319   0.00361
  18        8D-2        0.00198   0.00185  -0.00217  -0.00103  -0.00136
  19        9D 0       -0.08611   0.34144   0.16893   0.49584  -0.05226
  20        9D+1       -0.22190  -0.23772  -0.01517   0.16670  -0.02133
  21        9D-1        0.07859   0.13781  -0.01933   0.27484   0.00975
  22        9D+2        0.05944  -0.01561   0.13709  -0.35575   0.01732
  23        9D-2       -0.02722   0.08048  -0.02885  -0.07355   0.22726
  24       10F 0        0.01931  -0.02896   0.01684  -0.06628   0.00746
  25       10F+1       -0.00559   0.00941  -0.00044  -0.00680  -0.00468
  26       10F-1        0.00964  -0.00011   0.00014  -0.01125   0.00128
  27       10F+2        0.01490   0.00723   0.02756  -0.01749   0.00902
  28       10F-2        0.00744   0.00065   0.00252  -0.00050  -0.00199
  29       10F+3        0.00019   0.00847  -0.00147  -0.00683   0.00909
  30       10F-3       -0.00453  -0.00773  -0.00011  -0.00731  -0.00015
  31 2   C  1S         -0.01066  -0.02795  -0.02991  -0.04852  -0.00591
  32        2S          0.16315   0.06896   0.13412   0.17845   0.06244
  33        3S          0.07124   0.03829   0.03305   0.15097   0.02420
  34        4S          0.69600  -3.74324  -0.88114  -9.74221   0.05532
  35        5PX        -0.01548  -0.01154  -0.01034   0.01904   0.00430
  36        5PY        -0.02592   0.06625   0.01722  -0.01494   0.00608
  37        5PZ        -0.01104   0.13984  -0.06392   0.16899  -0.02227
  38        6PX        -0.14187  -0.01221  -0.03100   0.04825  -0.02752
  39        6PY        -0.17497  -0.05672  -0.18188  -0.22501  -0.06168
  40        6PZ         0.25964  -0.11163   0.06067  -0.15358   0.07644
  41        7PX         0.23352  -0.14987   0.04259   0.08500  -0.47445
  42        7PY         1.12512  -0.28322   0.59134   1.03727   0.20371
  43        7PZ        -1.23610  -3.32083  -0.41428  -4.53057  -0.31376
  44        8D 0        0.01992  -0.02523  -0.00181  -0.03827   0.00479
  45        8D+1        0.00548   0.00915   0.00075  -0.00581  -0.01278
  46        8D-1        0.01816   0.00402   0.00255   0.00209   0.00282
  47        8D+2        0.00829  -0.00528   0.00722  -0.01319   0.00361
  48        8D-2        0.00198  -0.00185  -0.00217   0.00103  -0.00136
  49        9D 0       -0.08611  -0.34144   0.16893  -0.49584  -0.05226
  50        9D+1        0.22190  -0.23772   0.01517   0.16670   0.02133
  51        9D-1       -0.07859   0.13781   0.01933   0.27484  -0.00975
  52        9D+2        0.05944   0.01561   0.13709   0.35575   0.01732
  53        9D-2       -0.02722  -0.08048  -0.02885   0.07355   0.22726
  54       10F 0       -0.01931  -0.02896  -0.01684  -0.06628  -0.00746
  55       10F+1       -0.00559  -0.00941  -0.00044   0.00680  -0.00468
  56       10F-1        0.00964   0.00011   0.00014   0.01125   0.00128
  57       10F+2       -0.01490   0.00723  -0.02756  -0.01749  -0.00902
  58       10F-2       -0.00744   0.00065  -0.00252  -0.00050   0.00199
  59       10F+3        0.00019  -0.00847  -0.00147   0.00683   0.00909
  60       10F-3       -0.00453   0.00773  -0.00011   0.00731  -0.00015
  61 3   C  1S          0.00160  -0.01492   0.04043   0.01157  -0.00119
  62        2S          0.00495   0.04487  -0.11614  -0.08142   0.01702
  63        3S          0.00215   0.02255   0.00888  -0.04588   0.02261
  64        4S          0.12981  -1.03457  -2.96788   0.72282  -1.04932
  65        5PX         0.00106   0.00112   0.01019  -0.01050   0.00691
  66        5PY        -0.04225   0.05731  -0.00367   0.05424  -0.03308
  67        5PZ         0.02207  -0.01615  -0.08107  -0.07338   0.00787
  68        6PX        -0.09947  -0.09310  -0.01502  -0.04885   0.15758
  69        6PY         0.08691   0.14817   0.33873   0.40827   0.01771
  70        6PZ         0.24712  -0.08364  -0.02775  -0.35195   0.13976
  71        7PX        -0.56707  -0.24429  -0.23662  -0.14363   0.89727
  72        7PY        -0.82885  -1.20237   0.58887  -0.08290   0.12250
  73        7PZ         0.21115   0.22105   0.44968   0.67336  -0.30062
  74        8D 0        0.00398   0.00288  -0.00570  -0.00164   0.00274
  75        8D+1       -0.00887  -0.00280   0.00376  -0.00149   0.00575
  76        8D-1        0.00984   0.00136  -0.00638   0.00914   0.00207
  77        8D+2       -0.00193  -0.00481  -0.00894   0.00139   0.00006
  78        8D-2       -0.00527   0.01714  -0.00199  -0.00974  -0.01751
  79        9D 0       -0.16807   0.05049   0.23221   0.11729   0.03102
  80        9D+1        0.28437   0.04915   0.03347   0.05576  -0.08021
  81        9D-1        0.01689  -0.06262   0.15886   0.12799   0.08058
  82        9D+2       -0.20083   0.17165  -0.26357   0.12104  -0.10551
  83        9D-2       -0.07595  -0.01148   0.01164   0.00535   0.03518
  84       10F 0       -0.01632   0.01333  -0.01219   0.01225  -0.01047
  85       10F+1       -0.01852  -0.00525  -0.01132   0.00620   0.00738
  86       10F-1       -0.00062  -0.00156   0.00394   0.01282   0.00404
  87       10F+2        0.00546   0.00198   0.03023  -0.02122   0.01639
  88       10F-2       -0.00961   0.01373   0.00598  -0.01129  -0.00146
  89       10F+3       -0.00608  -0.00174   0.00755  -0.00606   0.00433
  90       10F-3       -0.00853   0.01079  -0.00043  -0.00375  -0.00391
  91 4   C  1S          0.00160   0.01492   0.04043  -0.01157  -0.00119
  92        2S          0.00495  -0.04487  -0.11614   0.08142   0.01702
  93        3S          0.00215  -0.02255   0.00888   0.04588   0.02261
  94        4S          0.12981   1.03457  -2.96788  -0.72282  -1.04932
  95        5PX         0.00106  -0.00112   0.01019   0.01050   0.00691
  96        5PY        -0.04225  -0.05731  -0.00367  -0.05424  -0.03308
  97        5PZ        -0.02207  -0.01615   0.08107  -0.07338  -0.00787
  98        6PX        -0.09947   0.09310  -0.01502   0.04885   0.15758
  99        6PY         0.08691  -0.14817   0.33873  -0.40827   0.01771
 100        6PZ        -0.24712  -0.08364   0.02775  -0.35195  -0.13976
 101        7PX        -0.56707   0.24429  -0.23662   0.14363   0.89727
 102        7PY        -0.82885   1.20237   0.58887   0.08290   0.12250
 103        7PZ        -0.21115   0.22105  -0.44968   0.67336   0.30062
 104        8D 0        0.00398  -0.00288  -0.00570   0.00164   0.00274
 105        8D+1        0.00887  -0.00280  -0.00376  -0.00149  -0.00575
 106        8D-1       -0.00984   0.00136   0.00638   0.00914  -0.00207
 107        8D+2       -0.00193   0.00481  -0.00894  -0.00139   0.00006
 108        8D-2       -0.00527  -0.01714  -0.00199   0.00974  -0.01751
 109        9D 0       -0.16807  -0.05049   0.23221  -0.11729   0.03102
 110        9D+1       -0.28437   0.04915  -0.03347   0.05576   0.08021
 111        9D-1       -0.01689  -0.06262  -0.15886   0.12799  -0.08058
 112        9D+2       -0.20083  -0.17165  -0.26357  -0.12104  -0.10551
 113        9D-2       -0.07595   0.01148   0.01164  -0.00535   0.03518
 114       10F 0        0.01632   0.01333   0.01219   0.01225   0.01047
 115       10F+1       -0.01852   0.00525  -0.01132  -0.00620   0.00738
 116       10F-1       -0.00062   0.00156   0.00394  -0.01282   0.00404
 117       10F+2       -0.00546   0.00198  -0.03023  -0.02122  -0.01639
 118       10F-2        0.00961   0.01373  -0.00598  -0.01129   0.00146
 119       10F+3       -0.00608   0.00174   0.00755   0.00606   0.00433
 120       10F-3       -0.00853  -0.01079  -0.00043   0.00375  -0.00391
 121 5   Si 1S          0.00098   0.00000  -0.01072   0.00000  -0.00053
 122        2S         -0.01104   0.00000  -0.12138   0.00000  -0.02283
 123        3S         -0.02453   0.00000  -0.53296   0.00000  -0.07776
 124        4S         -0.14312   0.00000  -0.29837   0.00000  -0.12422
 125        5S          0.37616   0.00000   4.47487   0.00000   1.81259
 126        6PX        -0.00889   0.00000   0.03798   0.00000   0.09501
 127        6PY        -0.00006   0.00000  -0.13995   0.00000   0.02630
 128        6PZ         0.00000   0.00890   0.00000   0.05132   0.00000
 129        7PX         0.23755   0.00000  -0.20534   0.00000  -0.28331
 130        7PY        -0.17403   0.00000   0.68829   0.00000   0.02266
 131        7PZ         0.00000   0.07924   0.00000  -0.15384   0.00000
 132        8PX        -0.00640   0.00000  -0.01159   0.00000  -0.05778
 133        8PY         0.00095   0.00000   0.04564   0.00000  -0.01809
 134        8PZ         0.00000   0.00080   0.00000  -0.00468   0.00000
 135        9PX         0.30484   0.00000  -0.27958   0.00000  -0.87542
 136        9PY         0.54189   0.00000   1.78640   0.00000   0.45038
 137        9PZ         0.00000   0.38046   0.00000  -0.61242   0.00000
 138       10D 0       -1.23117   0.00000   0.98996   0.00000  -0.34929
 139       10D+1        0.00000  -0.01401   0.00000   0.22533   0.00000
 140       10D-1        0.00000  -0.20764   0.00000  -1.19481   0.00000
 141       10D+2       -0.17119   0.00000  -0.99566   0.00000  -0.44454
 142       10D-2       -0.16016   0.00000  -0.29438   0.00000   0.39344
 143       11D 0        0.00202   0.00000  -0.14812   0.00000  -0.05969
 144       11D+1        0.00000  -0.06623   0.00000  -0.02559   0.00000
 145       11D-1        0.00000   0.04636   0.00000   0.13593   0.00000
 146       11D+2        0.01944   0.00000  -0.05243   0.00000  -0.05165
 147       11D-2        0.01217   0.00000  -0.02842   0.00000   0.05747
 148       12F 0        0.00000   0.06339   0.00000  -0.05142   0.00000
 149       12F+1        0.03869   0.00000   0.00420   0.00000  -0.00220
 150       12F-1        0.03475   0.00000   0.06134   0.00000   0.07737
 151       12F+2        0.00000  -0.02001   0.00000  -0.01594   0.00000
 152       12F-2        0.00000   0.07685   0.00000  -0.07032   0.00000
 153       12F+3        0.03995   0.00000   0.04160   0.00000   0.04236
 154       12F-3       -0.10607   0.00000  -0.09036   0.00000  -0.03527
 155 6   H  1S          0.01623   0.00369   0.00809   0.00215  -0.00685
 156        2S          0.71238  -0.06911   0.82648   0.28802  -0.11484
 157        3S          0.04900  -0.17089   0.26409   0.01373  -0.19383
 158        4PX        -0.01429  -0.00717  -0.01034  -0.00439  -0.00290
 159        4PY         0.01502   0.02160   0.00010  -0.01081   0.00895
 160        4PZ        -0.01028   0.00388  -0.00952  -0.00571   0.00205
 161        5PX        -0.08337   0.15830  -0.04873  -0.04933   0.04755
 162        5PY        -0.21156  -0.32529   0.01191   0.19577  -0.19218
 163        5PZ        -0.09427  -0.03973  -0.13290  -0.05330  -0.07188
 164        6D 0        0.00203   0.00527   0.01168   0.00010   0.00643
 165        6D+1        0.00897  -0.00464   0.01491   0.01019   0.00018
 166        6D-1        0.00617   0.00924   0.00003  -0.00975   0.00542
 167        6D+2        0.00813  -0.00270  -0.00334   0.00367   0.00395
 168        6D-2        0.00146   0.00204  -0.00180  -0.00312   0.00166
 169 7   H  1S         -0.01262   0.01154   0.01654   0.00815   0.01541
 170        2S         -0.17919   0.25128   0.85304   0.39966   0.75741
 171        3S         -0.25136   0.08047  -0.03121   0.13821  -0.02458
 172        4PX         0.00099   0.00697   0.01572   0.00940   0.00649
 173        4PY        -0.01386  -0.01655  -0.00131   0.01308  -0.00992
 174        4PZ         0.00145  -0.00496  -0.00911  -0.00137  -0.00796
 175        5PX        -0.05050  -0.04154   0.03278   0.06496   0.17060
 176        5PY         0.14202   0.30353   0.05700  -0.17149   0.24082
 177        5PZ        -0.05118   0.02688  -0.05609  -0.08618   0.01834
 178        6D 0        0.00583  -0.00289   0.00197  -0.00191  -0.00667
 179        6D+1       -0.00367  -0.00190  -0.01484  -0.00669  -0.00963
 180        6D-1       -0.00361  -0.00949  -0.00271   0.00132  -0.00837
 181        6D+2        0.00091  -0.00426  -0.00005   0.00966   0.00651
 182        6D-2        0.00171   0.00984   0.00371   0.00153   0.00930
 183 8   H  1S         -0.01262  -0.01154   0.01654  -0.00815   0.01541
 184        2S         -0.17919  -0.25128   0.85304  -0.39966   0.75741
 185        3S         -0.25136  -0.08047  -0.03121  -0.13821  -0.02458
 186        4PX         0.00099  -0.00697   0.01572  -0.00940   0.00649
 187        4PY        -0.01386   0.01655  -0.00131  -0.01308  -0.00992
 188        4PZ        -0.00145  -0.00496   0.00911  -0.00137   0.00796
 189        5PX        -0.05050   0.04154   0.03278  -0.06496   0.17060
 190        5PY         0.14202  -0.30353   0.05700   0.17149   0.24082
 191        5PZ         0.05118   0.02688   0.05609  -0.08618  -0.01834
 192        6D 0        0.00583   0.00289   0.00197   0.00191  -0.00667
 193        6D+1        0.00367  -0.00190   0.01484  -0.00669   0.00963
 194        6D-1        0.00361  -0.00949   0.00271   0.00132   0.00837
 195        6D+2        0.00091   0.00426  -0.00005  -0.00966   0.00651
 196        6D-2        0.00171  -0.00984   0.00371  -0.00153   0.00930
 197 9   H  1S          0.01623  -0.00369   0.00809  -0.00215  -0.00685
 198        2S          0.71238   0.06911   0.82648  -0.28802  -0.11484
 199        3S          0.04900   0.17089   0.26409  -0.01373  -0.19383
 200        4PX        -0.01429   0.00717  -0.01034   0.00439  -0.00290
 201        4PY         0.01502  -0.02160   0.00010   0.01081   0.00895
 202        4PZ         0.01028   0.00388   0.00952  -0.00571  -0.00205
 203        5PX        -0.08337  -0.15830  -0.04873   0.04933   0.04755
 204        5PY        -0.21156   0.32529   0.01191  -0.19577  -0.19218
 205        5PZ         0.09427  -0.03973   0.13290  -0.05330   0.07188
 206        6D 0        0.00203  -0.00527   0.01168  -0.00010   0.00643
 207        6D+1       -0.00897  -0.00464  -0.01491   0.01019  -0.00018
 208        6D-1       -0.00617   0.00924  -0.00003  -0.00975  -0.00542
 209        6D+2        0.00813   0.00270  -0.00334  -0.00367   0.00395
 210        6D-2        0.00146  -0.00204  -0.00180   0.00312   0.00166
 211 10  H  1S         -0.03157  -0.00894  -0.01670  -0.00155  -0.00666
 212        2S         -0.40258   0.02160   0.03229   0.87311  -0.07317
 213        3S         -0.65385  -0.39801   0.05663  -0.83986  -0.06301
 214        4PX         0.01498   0.01058   0.00267  -0.00628  -0.03138
 215        4PY         0.00170   0.00006  -0.00127  -0.01344  -0.00075
 216        4PZ        -0.00014  -0.00593  -0.00654   0.00098  -0.00198
 217        5PX        -0.16479  -0.18007  -0.03680   0.12530   0.41688
 218        5PY        -0.15755  -0.05808  -0.27808  -0.15881  -0.10280
 219        5PZ         0.04158   0.18064   0.25249   0.28709   0.05918
 220        6D 0       -0.00216   0.00185   0.00140   0.00630  -0.00218
 221        6D+1        0.00513  -0.00093  -0.00002   0.00157   0.00053
 222        6D-1       -0.01143  -0.00720  -0.02341  -0.01550  -0.00681
 223        6D+2       -0.01417  -0.00112  -0.01267  -0.00626  -0.00640
 224        6D-2       -0.00075   0.00723  -0.00048  -0.00486  -0.00457
 225 11  H  1S         -0.03157   0.00894  -0.01670   0.00155  -0.00666
 226        2S         -0.40258  -0.02160   0.03229  -0.87311  -0.07317
 227        3S         -0.65385   0.39801   0.05663   0.83986  -0.06301
 228        4PX         0.01498  -0.01058   0.00267   0.00628  -0.03138
 229        4PY         0.00170  -0.00006  -0.00127   0.01344  -0.00075
 230        4PZ         0.00014  -0.00593   0.00654   0.00098   0.00198
 231        5PX        -0.16479   0.18007  -0.03680  -0.12530   0.41688
 232        5PY        -0.15755   0.05808  -0.27808   0.15881  -0.10280
 233        5PZ        -0.04158   0.18064  -0.25249   0.28709  -0.05918
 234        6D 0       -0.00216  -0.00185   0.00140  -0.00630  -0.00218
 235        6D+1       -0.00513  -0.00093   0.00002   0.00157  -0.00053
 236        6D-1        0.01143  -0.00720   0.02341  -0.01550   0.00681
 237        6D+2       -0.01417   0.00112  -0.01267   0.00626  -0.00640
 238        6D-2       -0.00075  -0.00723  -0.00048   0.00486  -0.00457
 239 12  H  1S         -0.00883   0.00000   0.01654   0.00000  -0.03324
 240        2S         -0.43131   0.00000   0.42144   0.00000  -0.98895
 241        3S          0.19325   0.00000  -0.44310   0.00000  -0.00073
 242        4PX         0.00688   0.00000   0.00759   0.00000  -0.00926
 243        4PY        -0.01238   0.00000   0.00362   0.00000  -0.02066
 244        4PZ         0.00000  -0.01260   0.00000   0.02888   0.00000
 245        5PX        -0.13328   0.00000  -0.11634   0.00000   0.10263
 246        5PY         0.03661   0.00000  -0.14734   0.00000   0.23321
 247        5PZ         0.00000   0.17630   0.00000  -0.33247   0.00000
 248        6D 0       -0.00146   0.00000   0.00674   0.00000   0.00147
 249        6D+1        0.00000   0.00156   0.00000  -0.00060   0.00000
 250        6D-1        0.00000  -0.00222   0.00000  -0.01156   0.00000
 251        6D+2        0.00479   0.00000  -0.00166   0.00000  -0.00331
 252        6D-2       -0.00823   0.00000  -0.00764   0.00000  -0.00269
 253 13  H  1S          0.00267   0.00000   0.02191   0.00000   0.01705
 254        2S         -0.65662   0.00000   0.67089   0.00000   0.43730
 255        3S         -0.11484   0.00000  -0.61951   0.00000  -0.18736
 256        4PX         0.00671   0.00000  -0.01284   0.00000  -0.01259
 257        4PY         0.01203   0.00000  -0.00440   0.00000  -0.00298
 258        4PZ         0.00000   0.03082   0.00000   0.00273   0.00000
 259        5PX         0.01549   0.00000   0.20398   0.00000   0.23256
 260        5PY        -0.19514   0.00000   0.00719   0.00000  -0.01772
 261        5PZ         0.00000  -0.38822   0.00000  -0.01421   0.00000
 262        6D 0        0.00179   0.00000   0.00503   0.00000  -0.00218
 263        6D+1        0.00000   0.00059   0.00000   0.00695   0.00000
 264        6D-1        0.00000  -0.00120   0.00000  -0.00996   0.00000
 265        6D+2       -0.00628   0.00000  -0.01012   0.00000  -0.00426
 266        6D-2        0.00672   0.00000  -0.00009   0.00000   0.00926
                          71        72        73        74        75
                           V         V         V         V         V
     Eigenvalues --     0.94327   0.95792   0.96790   1.00063   1.01990
   1 1   C  1S         -0.02288   0.00643   0.00447  -0.02101   0.00204
   2        2S          0.03559  -0.07670  -0.10084   0.05744   0.04418
   3        3S         -0.06066   0.01804  -0.12471   0.03232   0.02518
   4        4S          2.99061  -2.23462  10.55296  -0.30102   0.64856
   5        5PX         0.00066  -0.00902   0.00098  -0.00391  -0.00143
   6        5PY         0.02252   0.00475  -0.12534  -0.06297  -0.05009
   7        5PZ        -0.01118  -0.02461  -0.01006  -0.07064  -0.05733
   8        6PX        -0.00119  -0.04853  -0.02450  -0.01483  -0.00047
   9        6PY        -0.15888  -0.02224   0.22462   0.13228  -0.27027
  10        6PZ         0.30495  -0.20856  -0.41338  -0.11834   0.07060
  11        7PX        -0.05893  -0.03275   0.17900  -0.09762  -0.16346
  12        7PY        -1.44550   1.06836  -7.93118  -1.70128  -0.52551
  13        7PZ         2.54362  -0.29067  -2.23934   0.33922  -0.56429
  14        8D 0       -0.00116   0.00395   0.01193  -0.00972   0.00457
  15        8D+1       -0.00195   0.00003  -0.00284  -0.00233   0.00092
  16        8D-1        0.00724   0.00453   0.03072   0.00083  -0.00090
  17        8D+2        0.00618   0.00145   0.00572  -0.00182  -0.00631
  18        8D-2       -0.00003  -0.00168  -0.00159   0.00095  -0.00178
  19        9D 0       -0.24465   0.15531   0.29491  -0.04804   0.04790
  20        9D+1        0.03035  -0.07543   0.05449   0.08571   0.01238
  21        9D-1       -0.20632  -0.04232  -0.10949   0.12931  -0.11886
  22        9D+2       -0.40285   0.26309  -0.25032   0.05456   0.23926
  23        9D-2       -0.01020   0.03494  -0.00879  -0.01545   0.05844
  24       10F 0       -0.01360   0.01732  -0.05281   0.00818  -0.01406
  25       10F+1       -0.00141  -0.00601  -0.00211  -0.00456   0.00125
  26       10F-1        0.00602   0.00134   0.00660   0.01644   0.00333
  27       10F+2       -0.02245   0.02419  -0.01740   0.00482   0.00405
  28       10F-2       -0.00270   0.00178   0.00130  -0.00189  -0.00117
  29       10F+3       -0.00129  -0.00051  -0.00110  -0.00392   0.00275
  30       10F-3        0.00520  -0.00969   0.00531  -0.00239   0.01067
  31 2   C  1S          0.02288   0.00643  -0.00447   0.02101   0.00204
  32        2S         -0.03559  -0.07670   0.10084  -0.05744   0.04418
  33        3S          0.06066   0.01804   0.12471  -0.03232   0.02518
  34        4S         -2.99061  -2.23462 -10.55296   0.30102   0.64856
  35        5PX        -0.00066  -0.00902  -0.00098   0.00391  -0.00143
  36        5PY        -0.02252   0.00475   0.12534   0.06297  -0.05009
  37        5PZ        -0.01118   0.02461  -0.01006  -0.07064   0.05733
  38        6PX         0.00119  -0.04853   0.02450   0.01483  -0.00047
  39        6PY         0.15888  -0.02224  -0.22462  -0.13228  -0.27027
  40        6PZ         0.30495   0.20856  -0.41338  -0.11834  -0.07060
  41        7PX         0.05893  -0.03275  -0.17900   0.09762  -0.16346
  42        7PY         1.44550   1.06836   7.93118   1.70128  -0.52551
  43        7PZ         2.54362   0.29067  -2.23934   0.33922   0.56429
  44        8D 0        0.00116   0.00395  -0.01193   0.00972   0.00457
  45        8D+1       -0.00195  -0.00003  -0.00284  -0.00233  -0.00092
  46        8D-1        0.00724  -0.00453   0.03072   0.00083   0.00090
  47        8D+2       -0.00618   0.00145  -0.00572   0.00182  -0.00631
  48        8D-2        0.00003  -0.00168   0.00159  -0.00095  -0.00178
  49        9D 0        0.24465   0.15531  -0.29491   0.04804   0.04790
  50        9D+1        0.03035   0.07543   0.05449   0.08571  -0.01238
  51        9D-1       -0.20632   0.04232  -0.10949   0.12931   0.11886
  52        9D+2        0.40285   0.26309   0.25032  -0.05456   0.23926
  53        9D-2        0.01020   0.03494   0.00879   0.01545   0.05844
  54       10F 0       -0.01360  -0.01732  -0.05281   0.00818   0.01406
  55       10F+1        0.00141  -0.00601   0.00211   0.00456   0.00125
  56       10F-1       -0.00602   0.00134  -0.00660  -0.01644   0.00333
  57       10F+2       -0.02245  -0.02419  -0.01740   0.00482  -0.00405
  58       10F-2       -0.00270  -0.00178   0.00130  -0.00189   0.00117
  59       10F+3        0.00129  -0.00051   0.00110   0.00392   0.00275
  60       10F-3       -0.00520  -0.00969  -0.00531   0.00239   0.01067
  61 3   C  1S         -0.01186   0.01151  -0.02107  -0.02065   0.00909
  62        2S         -0.10678  -0.18828   0.08596   0.03360   0.06109
  63        3S         -0.17837  -0.17325  -0.02471  -0.00811   0.09335
  64        4S          8.85578   6.43714   8.28083   2.33605  -3.47556
  65        5PX         0.01224  -0.01154   0.01343  -0.00101   0.00175
  66        5PY        -0.03629   0.02170   0.05091  -0.02505   0.04679
  67        5PZ        -0.02737  -0.07606   0.06813   0.04616   0.02071
  68        6PX        -0.02310  -0.02325   0.05217  -0.09284   0.02950
  69        6PY        -0.00075   0.11013   0.50338  -0.07109   0.12734
  70        6PZ        -0.42304  -0.86318   0.32085  -0.06585   0.44120
  71        7PX        -0.08803   0.73339   0.29408  -0.14456   0.42377
  72        7PY         1.57363  -0.14502   1.18582  -0.27752  -0.39082
  73        7PZ         0.59626   1.01855   2.21000   0.59714  -1.51592
  74        8D 0       -0.01129  -0.00833  -0.00757   0.00468   0.01000
  75        8D+1       -0.00729  -0.00219  -0.00009  -0.00260   0.00385
  76        8D-1        0.00782   0.00280   0.00924   0.01426  -0.00145
  77        8D+2        0.01375   0.02374  -0.00303   0.00238  -0.01673
  78        8D-2        0.00152  -0.00035  -0.00155   0.00012  -0.00296
  79        9D 0        0.02964   0.01381   0.00904   0.03001  -0.41961
  80        9D+1       -0.04070  -0.15425  -0.06410   0.16514   0.07688
  81        9D-1        0.25435   0.07686  -0.04310  -0.18537  -0.32558
  82        9D+2        0.20554   0.23214  -0.17200   0.43736  -0.25965
  83        9D-2        0.11111  -0.01662   0.00453   0.02254  -0.10046
  84       10F 0        0.01674   0.01667   0.00412   0.03044  -0.02743
  85       10F+1        0.02479   0.03638   0.01142   0.00094  -0.02321
  86       10F-1       -0.00074   0.00161  -0.00839  -0.00252   0.00692
  87       10F+2       -0.09479  -0.08205  -0.00399  -0.01715   0.03940
  88       10F-2       -0.00959  -0.00958  -0.00452  -0.00999   0.00287
  89       10F+3       -0.00703  -0.00587  -0.00090  -0.01326   0.00295
  90       10F-3       -0.02631  -0.01673   0.00104   0.01053   0.01704
  91 4   C  1S          0.01186   0.01151   0.02107   0.02065   0.00909
  92        2S          0.10678  -0.18828  -0.08596  -0.03360   0.06109
  93        3S          0.17837  -0.17325   0.02471   0.00811   0.09335
  94        4S         -8.85578   6.43714  -8.28083  -2.33605  -3.47556
  95        5PX        -0.01224  -0.01154  -0.01343   0.00101   0.00175
  96        5PY         0.03629   0.02170  -0.05091   0.02505   0.04679
  97        5PZ        -0.02737   0.07606   0.06813   0.04616  -0.02071
  98        6PX         0.02310  -0.02325  -0.05217   0.09284   0.02950
  99        6PY         0.00075   0.11013  -0.50338   0.07109   0.12734
 100        6PZ        -0.42304   0.86318   0.32085  -0.06585  -0.44120
 101        7PX         0.08803   0.73339  -0.29408   0.14456   0.42377
 102        7PY        -1.57363  -0.14502  -1.18582   0.27752  -0.39082
 103        7PZ         0.59626  -1.01855   2.21000   0.59714   1.51592
 104        8D 0        0.01129  -0.00833   0.00757  -0.00468   0.01000
 105        8D+1       -0.00729   0.00219  -0.00009  -0.00260  -0.00385
 106        8D-1        0.00782  -0.00280   0.00924   0.01426   0.00145
 107        8D+2       -0.01375   0.02374   0.00303  -0.00238  -0.01673
 108        8D-2       -0.00152  -0.00035   0.00155  -0.00012  -0.00296
 109        9D 0       -0.02964   0.01381  -0.00904  -0.03001  -0.41961
 110        9D+1       -0.04070   0.15425  -0.06410   0.16514  -0.07688
 111        9D-1        0.25435  -0.07686  -0.04310  -0.18537   0.32558
 112        9D+2       -0.20554   0.23214   0.17200  -0.43736  -0.25965
 113        9D-2       -0.11111  -0.01662  -0.00453  -0.02254  -0.10046
 114       10F 0        0.01674  -0.01667   0.00412   0.03044   0.02743
 115       10F+1       -0.02479   0.03638  -0.01142  -0.00094  -0.02321
 116       10F-1        0.00074   0.00161   0.00839   0.00252   0.00692
 117       10F+2       -0.09479   0.08205  -0.00399  -0.01715  -0.03940
 118       10F-2       -0.00959   0.00958  -0.00452  -0.00999  -0.00287
 119       10F+3        0.00703  -0.00587   0.00090   0.01326   0.00295
 120       10F-3        0.02631  -0.01673  -0.00104  -0.01053   0.01704
 121 5   Si 1S          0.00000  -0.01232   0.00000   0.00000   0.01809
 122        2S          0.00000   0.00185   0.00000   0.00000  -0.00968
 123        3S          0.00000  -0.24812   0.00000   0.00000   0.35559
 124        4S          0.00000   0.01031   0.00000   0.00000  -0.07213
 125        5S          0.00000  -4.32734   0.00000   0.00000   4.00298
 126        6PX         0.00000   0.04916   0.00000   0.00000   0.03686
 127        6PY         0.00000  -0.05346   0.00000   0.00000  -0.10847
 128        6PZ        -0.10384   0.00000  -0.06164  -0.06236   0.00000
 129        7PX         0.00000   0.00413   0.00000   0.00000  -0.12952
 130        7PY         0.00000  -0.56631   0.00000   0.00000   0.34404
 131        7PZ         0.96488   0.00000   1.07444   0.64243   0.00000
 132        8PX         0.00000  -0.03297   0.00000   0.00000  -0.02635
 133        8PY         0.00000   0.04678   0.00000   0.00000   0.07811
 134        8PZ         0.03951   0.00000   0.01880   0.02378   0.00000
 135        9PX         0.00000  -0.90786   0.00000   0.00000  -0.56781
 136        9PY         0.00000  -0.66637   0.00000   0.00000   1.19181
 137        9PZ         1.10730   0.00000   0.92468   1.16808   0.00000
 138       10D 0        0.00000  -0.30217   0.00000   0.00000  -0.93207
 139       10D+1       -0.19982   0.00000  -0.22655  -0.06969   0.00000
 140       10D-1        1.17834   0.00000   0.95600   0.27977   0.00000
 141       10D+2        0.00000  -0.37446   0.00000   0.00000  -0.51956
 142       10D-2        0.00000   0.16628   0.00000   0.00000  -0.36089
 143       11D 0        0.00000   0.05903   0.00000   0.00000   0.31674
 144       11D+1        0.04753   0.00000   0.07231  -0.10255   0.00000
 145       11D-1       -0.01443   0.00000  -0.05089   0.00295   0.00000
 146       11D+2        0.00000   0.06082   0.00000   0.00000   0.17565
 147       11D-2        0.00000   0.02151   0.00000   0.00000   0.06243
 148       12F 0       -0.05280   0.00000  -0.02871   0.15403   0.00000
 149       12F+1        0.00000   0.04681   0.00000   0.00000   0.00243
 150       12F-1        0.00000  -0.07406   0.00000   0.00000   0.12482
 151       12F+2       -0.13679   0.00000  -0.02006  -0.07442   0.00000
 152       12F-2       -0.05832   0.00000  -0.03331  -0.04296   0.00000
 153       12F+3        0.00000  -0.01194   0.00000   0.00000   0.11319
 154       12F-3        0.00000   0.05957   0.00000   0.00000  -0.12384
 155 6   H  1S          0.02374  -0.02718   0.00693  -0.00179  -0.00434
 156        2S          1.87370  -1.97395   0.51832   0.23191   0.84832
 157        3S          0.09636  -0.00619  -0.15009  -0.24644  -0.39589
 158        4PX        -0.01815   0.01339   0.00518  -0.01255  -0.00929
 159        4PY        -0.00147   0.00181  -0.00486  -0.00764   0.00094
 160        4PZ        -0.02850   0.02669  -0.00287   0.00381  -0.01496
 161        5PX        -0.30370   0.49430  -0.17304   0.12319  -0.24347
 162        5PY         0.03558  -0.06685   0.13327   0.21841   0.01396
 163        5PZ        -0.14275   0.22889   0.02005  -0.18464  -0.10332
 164        6D 0        0.00792  -0.00918  -0.00334   0.01114  -0.00050
 165        6D+1        0.03302  -0.04472  -0.00056   0.00513   0.02131
 166        6D-1       -0.00551   0.00277  -0.00729  -0.00592  -0.00010
 167        6D+2        0.02270  -0.02814   0.00675  -0.00581   0.02224
 168        6D-2        0.00044   0.00197  -0.00269  -0.01099   0.00193
 169 7   H  1S          0.03161  -0.01064  -0.00471   0.00075   0.00169
 170        2S          1.85534  -1.32118   0.21379   0.71718   0.93752
 171        3S          0.24008   0.13873  -0.20814  -0.08409  -0.16773
 172        4PX         0.02049  -0.01779  -0.00522   0.02129   0.01689
 173        4PY         0.00235  -0.01414   0.00263  -0.00196  -0.00037
 174        4PZ        -0.02734   0.01236   0.00499  -0.00297  -0.00084
 175        5PX         0.38648  -0.33062   0.06333   0.01878   0.15529
 176        5PY         0.05592   0.10631   0.00821   0.15097   0.08301
 177        5PZ         0.00410   0.15882  -0.05425  -0.14247  -0.14009
 178        6D 0       -0.00789   0.00119   0.00376  -0.00047  -0.00226
 179        6D+1       -0.02494   0.02758   0.00423  -0.01212  -0.01140
 180        6D-1       -0.00565   0.00389  -0.00130  -0.00324  -0.00319
 181        6D+2        0.03084  -0.03257   0.00315  -0.00045   0.02489
 182        6D-2        0.00648  -0.00760   0.00030   0.01345   0.00404
 183 8   H  1S         -0.03161  -0.01064   0.00471  -0.00075   0.00169
 184        2S         -1.85534  -1.32118  -0.21379  -0.71718   0.93752
 185        3S         -0.24008   0.13873   0.20814   0.08409  -0.16773
 186        4PX        -0.02049  -0.01779   0.00522  -0.02129   0.01689
 187        4PY        -0.00235  -0.01414  -0.00263   0.00196  -0.00037
 188        4PZ        -0.02734  -0.01236   0.00499  -0.00297   0.00084
 189        5PX        -0.38648  -0.33062  -0.06333  -0.01878   0.15529
 190        5PY        -0.05592   0.10631  -0.00821  -0.15097   0.08301
 191        5PZ         0.00410  -0.15882  -0.05425  -0.14247   0.14009
 192        6D 0        0.00789   0.00119  -0.00376   0.00047  -0.00226
 193        6D+1       -0.02494  -0.02758   0.00423  -0.01212   0.01140
 194        6D-1       -0.00565  -0.00389  -0.00130  -0.00324   0.00319
 195        6D+2       -0.03084  -0.03257  -0.00315   0.00045   0.02489
 196        6D-2       -0.00648  -0.00760  -0.00030  -0.01345   0.00404
 197 9   H  1S         -0.02374  -0.02718  -0.00693   0.00179  -0.00434
 198        2S         -1.87370  -1.97395  -0.51832  -0.23191   0.84832
 199        3S         -0.09636  -0.00619   0.15009   0.24644  -0.39589
 200        4PX         0.01815   0.01339  -0.00518   0.01255  -0.00929
 201        4PY         0.00147   0.00181   0.00486   0.00764   0.00094
 202        4PZ        -0.02850  -0.02669  -0.00287   0.00381   0.01496
 203        5PX         0.30370   0.49430   0.17304  -0.12319  -0.24347
 204        5PY        -0.03558  -0.06685  -0.13327  -0.21841   0.01396
 205        5PZ        -0.14275  -0.22889   0.02005  -0.18464   0.10332
 206        6D 0       -0.00792  -0.00918   0.00334  -0.01114  -0.00050
 207        6D+1        0.03302   0.04472  -0.00056   0.00513  -0.02131
 208        6D-1       -0.00551  -0.00277  -0.00729  -0.00592   0.00010
 209        6D+2       -0.02270  -0.02814  -0.00675   0.00581   0.02224
 210        6D-2       -0.00044   0.00197   0.00269   0.01099   0.00193
 211 10  H  1S          0.00325  -0.01311  -0.04632  -0.01079   0.00363
 212        2S          0.81501   0.49916  -0.65992  -0.31964   0.56478
 213        3S          0.28324  -0.27879  -2.01759  -0.33120   0.06929
 214        4PX         0.00081   0.00321  -0.00430   0.00094  -0.00644
 215        4PY        -0.01128  -0.00873   0.01177   0.01343  -0.01112
 216        4PZ         0.00369  -0.00126  -0.00704   0.00627   0.02470
 217        5PX        -0.00529  -0.03848   0.07440   0.00188   0.09085
 218        5PY         0.02488  -0.08297  -0.40070  -0.29618   0.09134
 219        5PZ         0.15203   0.14649   0.38640  -0.12347  -0.24881
 220        6D 0        0.01203   0.00595   0.00482  -0.00977   0.00073
 221        6D+1        0.00003   0.00025   0.00127   0.00068  -0.00052
 222        6D-1       -0.00378  -0.00796  -0.02505  -0.00390   0.00267
 223        6D+2       -0.00244  -0.00652  -0.01993  -0.00807   0.00345
 224        6D-2       -0.00027  -0.00022  -0.00273  -0.00092  -0.00053
 225 11  H  1S         -0.00325  -0.01311   0.04632   0.01079   0.00363
 226        2S         -0.81501   0.49916   0.65992   0.31964   0.56478
 227        3S         -0.28324  -0.27879   2.01759   0.33120   0.06929
 228        4PX        -0.00081   0.00321   0.00430  -0.00094  -0.00644
 229        4PY         0.01128  -0.00873  -0.01177  -0.01343  -0.01112
 230        4PZ         0.00369   0.00126  -0.00704   0.00627  -0.02470
 231        5PX         0.00529  -0.03848  -0.07440  -0.00188   0.09085
 232        5PY        -0.02488  -0.08297   0.40070   0.29618   0.09134
 233        5PZ         0.15203  -0.14649   0.38640  -0.12347   0.24881
 234        6D 0       -0.01203   0.00595  -0.00482   0.00977   0.00073
 235        6D+1        0.00003  -0.00025   0.00127   0.00068   0.00052
 236        6D-1       -0.00378   0.00796  -0.02505  -0.00390  -0.00267
 237        6D+2        0.00244  -0.00652   0.01993   0.00807   0.00345
 238        6D-2        0.00027  -0.00022   0.00273   0.00092  -0.00053
 239 12  H  1S          0.00000   0.00546   0.00000   0.00000   0.00637
 240        2S          0.00000   0.01780   0.00000   0.00000  -0.26849
 241        3S          0.00000   0.04200   0.00000   0.00000  -0.78722
 242        4PX         0.00000  -0.01219   0.00000   0.00000  -0.00267
 243        4PY         0.00000   0.01821   0.00000   0.00000   0.01915
 244        4PZ        -0.00720   0.00000  -0.00765   0.05586   0.00000
 245        5PX         0.00000   0.17330   0.00000   0.00000  -0.09296
 246        5PY         0.00000  -0.26028   0.00000   0.00000  -0.40968
 247        5PZ         0.10277   0.00000   0.11869  -0.69155   0.00000
 248        6D 0        0.00000   0.00285   0.00000   0.00000   0.00351
 249        6D+1        0.00334   0.00000   0.00383   0.00412   0.00000
 250        6D-1        0.00272   0.00000  -0.00005   0.00281   0.00000
 251        6D+2        0.00000  -0.00515   0.00000   0.00000   0.00035
 252        6D-2        0.00000  -0.00275   0.00000   0.00000  -0.01069
 253 13  H  1S          0.00000   0.01455   0.00000   0.00000   0.00678
 254        2S          0.00000   0.66850   0.00000   0.00000  -0.27089
 255        3S          0.00000   0.81892   0.00000   0.00000  -0.56392
 256        4PX         0.00000  -0.01184   0.00000   0.00000  -0.01306
 257        4PY         0.00000   0.00843   0.00000   0.00000   0.00224
 258        4PZ         0.00123   0.00000  -0.00854   0.03640   0.00000
 259        5PX         0.00000   0.14876   0.00000   0.00000   0.36245
 260        5PY         0.00000  -0.14972   0.00000   0.00000  -0.11504
 261        5PZ         0.02221   0.00000   0.15446  -0.45807   0.00000
 262        6D 0        0.00000   0.00194   0.00000   0.00000   0.00480
 263        6D+1       -0.00488   0.00000  -0.00298  -0.00553   0.00000
 264        6D-1       -0.00011   0.00000  -0.00003  -0.00291   0.00000
 265        6D+2        0.00000  -0.00566   0.00000   0.00000  -0.01142
 266        6D-2        0.00000   0.00061   0.00000   0.00000   0.00502
                          76        77        78        79        80
                           V         V         V         V         V
     Eigenvalues --     1.03815   1.08379   1.09873   1.12547   1.12642
   1 1   C  1S         -0.00648  -0.00108  -0.00261   0.00026  -0.00145
   2        2S          0.00606  -0.03556   0.03683  -0.01086   0.03168
   3        3S          0.01345  -0.03437   0.01743  -0.01163   0.03258
   4        4S         -0.42334   2.03493  -0.17659   1.65090   0.00392
   5        5PX        -0.00067  -0.03263  -0.00239  -0.04445  -0.00566
   6        5PY        -0.00487   0.00343  -0.00608  -0.01147  -0.01976
   7        5PZ        -0.00631  -0.02136   0.01308   0.01102   0.01958
   8        6PX        -0.03335  -0.07331   0.00561  -0.14761  -0.07831
   9        6PY         0.00221   0.06710  -0.18583  -0.06865  -0.12245
  10        6PZ        -0.08824   0.03747  -0.03125   0.06208  -0.17700
  11        7PX        -0.13428  -0.19455  -0.05181  -1.55912   0.13652
  12        7PY         0.42104  -1.23246  -0.04439  -0.43625   0.04556
  13        7PZ         0.25351  -0.04614   0.11130  -0.40151   0.62242
  14        8D 0        0.00225   0.00306  -0.00134  -0.00107   0.00523
  15        8D+1        0.00664   0.01115  -0.00358  -0.01462   0.00988
  16        8D-1        0.00226   0.00385   0.00585  -0.00255   0.00171
  17        8D+2        0.00176  -0.00131   0.00112   0.00104   0.00509
  18        8D-2        0.00383  -0.00234  -0.00556   0.01049  -0.00212
  19        9D 0        0.10615  -0.10365   0.01949   0.03442  -0.12327
  20        9D+1        0.02291  -0.12683  -0.12238   0.37736   0.15798
  21        9D-1        0.00280   0.00795  -0.12206   0.00926  -0.14675
  22        9D+2        0.03270  -0.10935   0.14107  -0.01343   0.09315
  23        9D-2       -0.00046   0.03462   0.26825   0.08310  -0.43264
  24       10F 0        0.00474  -0.01117   0.00434   0.00240   0.01258
  25       10F+1        0.00272   0.00197  -0.00925  -0.01961  -0.00377
  26       10F-1        0.00653   0.00134  -0.00132   0.00125  -0.00080
  27       10F+2        0.00985  -0.00506   0.01055  -0.00024   0.01253
  28       10F-2       -0.00189   0.00642   0.00375  -0.02210  -0.00494
  29       10F+3        0.01241   0.00717  -0.00212   0.01055   0.01075
  30       10F-3       -0.00591  -0.00259   0.00430   0.00177   0.00211
  31 2   C  1S         -0.00648   0.00108  -0.00261  -0.00026  -0.00145
  32        2S          0.00606   0.03556   0.03683   0.01086   0.03168
  33        3S          0.01345   0.03437   0.01743   0.01163   0.03258
  34        4S         -0.42334  -2.03493  -0.17659  -1.65090   0.00392
  35        5PX        -0.00067   0.03263  -0.00239   0.04445  -0.00566
  36        5PY        -0.00487  -0.00343  -0.00608   0.01147  -0.01976
  37        5PZ         0.00631  -0.02136  -0.01308   0.01102  -0.01958
  38        6PX        -0.03335   0.07331   0.00561   0.14761  -0.07831
  39        6PY         0.00221  -0.06710  -0.18583   0.06865  -0.12245
  40        6PZ         0.08824   0.03747   0.03125   0.06208   0.17700
  41        7PX        -0.13428   0.19455  -0.05181   1.55912   0.13652
  42        7PY         0.42104   1.23246  -0.04439   0.43625   0.04556
  43        7PZ        -0.25351  -0.04614  -0.11130  -0.40151  -0.62242
  44        8D 0        0.00225  -0.00306  -0.00134   0.00107   0.00523
  45        8D+1       -0.00664   0.01115   0.00358  -0.01462  -0.00988
  46        8D-1       -0.00226   0.00385  -0.00585  -0.00255  -0.00171
  47        8D+2        0.00176   0.00131   0.00112  -0.00104   0.00509
  48        8D-2        0.00383   0.00234  -0.00556  -0.01049  -0.00212
  49        9D 0        0.10615   0.10365   0.01949  -0.03442  -0.12327
  50        9D+1       -0.02291  -0.12683   0.12238   0.37736  -0.15798
  51        9D-1       -0.00280   0.00795   0.12206   0.00926   0.14675
  52        9D+2        0.03270   0.10935   0.14107   0.01343   0.09315
  53        9D-2       -0.00046  -0.03462   0.26825  -0.08310  -0.43264
  54       10F 0       -0.00474  -0.01117  -0.00434   0.00240  -0.01258
  55       10F+1        0.00272  -0.00197  -0.00925   0.01961  -0.00377
  56       10F-1        0.00653  -0.00134  -0.00132  -0.00125  -0.00080
  57       10F+2       -0.00985  -0.00506  -0.01055  -0.00024  -0.01253
  58       10F-2        0.00189   0.00642  -0.00375  -0.02210   0.00494
  59       10F+3        0.01241  -0.00717  -0.00212  -0.01055   0.01075
  60       10F-3       -0.00591   0.00259   0.00430  -0.00177   0.00211
  61 3   C  1S          0.00849   0.00468   0.00296   0.00586   0.00182
  62        2S         -0.07189  -0.01146   0.02640  -0.07928  -0.01565
  63        3S         -0.03989  -0.02253   0.02149  -0.04812  -0.01350
  64        4S          0.92716   1.86054  -0.77230   1.78169  -0.10335
  65        5PX        -0.03073  -0.06921   0.02880  -0.01386  -0.01963
  66        5PY         0.00583  -0.01172  -0.02427   0.03319  -0.00571
  67        5PZ        -0.02156  -0.00551  -0.00409  -0.00599   0.00762
  68        6PX        -0.26241  -0.28687   0.33667  -0.08288  -0.01388
  69        6PY         0.05843   0.01579  -0.03804   0.04811  -0.07984
  70        6PZ        -0.13356   0.01551  -0.07216  -0.08061  -0.08596
  71        7PX        -1.07031  -0.10273  -0.31997  -0.89941  -0.04679
  72        7PY        -0.31203   0.50848  -0.04770  -0.09200  -0.04524
  73        7PZ         0.27520   0.77267  -0.23150   1.37029   0.08995
  74        8D 0        0.00056  -0.00380  -0.00045   0.00613  -0.00101
  75        8D+1       -0.00547   0.00264  -0.00069   0.00044   0.01263
  76        8D-1       -0.00348  -0.00177  -0.00168   0.00338  -0.00235
  77        8D+2        0.00540  -0.00213  -0.00106   0.00715   0.00310
  78        8D-2       -0.00605   0.01473  -0.01512  -0.00331  -0.00108
  79        9D 0       -0.10742  -0.01419   0.06983   0.17941  -0.03611
  80        9D+1        0.28056   0.57562  -0.55885   0.12284  -0.28114
  81        9D-1        0.09209   0.13876   0.01843  -0.20520   0.17315
  82        9D+2       -0.10104   0.08057  -0.04956  -0.08851  -0.00638
  83        9D-2        0.21847  -0.51062   0.19743   0.17072   0.17050
  84       10F 0        0.00024   0.01265  -0.01218   0.00238   0.00114
  85       10F+1       -0.01120  -0.03686   0.03293  -0.00664  -0.00081
  86       10F-1        0.00067  -0.00487   0.00470   0.00068   0.00171
  87       10F+2       -0.01282  -0.00858   0.00782  -0.01046  -0.01632
  88       10F-2       -0.00683   0.00480   0.02288  -0.01421  -0.01793
  89       10F+3       -0.01050  -0.02093   0.01276  -0.00134   0.02834
  90       10F-3       -0.01159  -0.00770   0.00154   0.00249  -0.01246
  91 4   C  1S          0.00849  -0.00468   0.00296  -0.00586   0.00182
  92        2S         -0.07189   0.01146   0.02640   0.07928  -0.01565
  93        3S         -0.03989   0.02253   0.02149   0.04812  -0.01350
  94        4S          0.92716  -1.86054  -0.77230  -1.78169  -0.10335
  95        5PX        -0.03073   0.06921   0.02880   0.01386  -0.01963
  96        5PY         0.00583   0.01172  -0.02427  -0.03319  -0.00571
  97        5PZ         0.02156  -0.00551   0.00409  -0.00599  -0.00762
  98        6PX        -0.26241   0.28687   0.33667   0.08288  -0.01388
  99        6PY         0.05843  -0.01579  -0.03804  -0.04811  -0.07984
 100        6PZ         0.13356   0.01551   0.07216  -0.08061   0.08596
 101        7PX        -1.07031   0.10273  -0.31997   0.89941  -0.04679
 102        7PY        -0.31203  -0.50848  -0.04770   0.09200  -0.04524
 103        7PZ        -0.27520   0.77267   0.23150   1.37029  -0.08995
 104        8D 0        0.00056   0.00380  -0.00045  -0.00613  -0.00101
 105        8D+1        0.00547   0.00264   0.00069   0.00044  -0.01263
 106        8D-1        0.00348  -0.00177   0.00168   0.00338   0.00235
 107        8D+2        0.00540   0.00213  -0.00106  -0.00715   0.00310
 108        8D-2       -0.00605  -0.01473  -0.01512   0.00331  -0.00108
 109        9D 0       -0.10742   0.01419   0.06983  -0.17941  -0.03611
 110        9D+1       -0.28056   0.57562   0.55885   0.12284   0.28114
 111        9D-1       -0.09209   0.13876  -0.01843  -0.20520  -0.17315
 112        9D+2       -0.10104  -0.08057  -0.04956   0.08851  -0.00638
 113        9D-2        0.21847   0.51062   0.19743  -0.17072   0.17050
 114       10F 0       -0.00024   0.01265   0.01218   0.00238  -0.00114
 115       10F+1       -0.01120   0.03686   0.03293   0.00664  -0.00081
 116       10F-1        0.00067   0.00487   0.00470  -0.00068   0.00171
 117       10F+2        0.01282  -0.00858  -0.00782  -0.01046   0.01632
 118       10F-2        0.00683   0.00480  -0.02288  -0.01421   0.01793
 119       10F+3       -0.01050   0.02093   0.01276   0.00134   0.02834
 120       10F-3       -0.01159   0.00770   0.00154  -0.00249  -0.01246
 121 5   Si 1S         -0.00363   0.00000   0.00296   0.00000  -0.00079
 122        2S         -0.00226   0.00000  -0.02109   0.00000   0.00684
 123        3S         -0.09110   0.00000   0.00765   0.00000  -0.00388
 124        4S         -0.10455   0.00000  -0.07432   0.00000  -0.02808
 125        5S          0.08883   0.00000   1.31449   0.00000  -0.08408
 126        6PX        -0.03772   0.00000  -0.04807   0.00000  -0.01010
 127        6PY        -0.04872   0.00000  -0.02770   0.00000   0.00017
 128        6PZ         0.00000   0.00367   0.00000   0.02686   0.00000
 129        7PX        -0.24421   0.00000  -1.10761   0.00000  -0.52466
 130        7PY        -0.15249   0.00000  -0.14969   0.00000   0.12346
 131        7PZ         0.00000   0.22794   0.00000   0.51222   0.00000
 132        8PX         0.03785   0.00000   0.08965   0.00000   0.02615
 133        8PY         0.03896   0.00000   0.03156   0.00000  -0.00935
 134        8PZ         0.00000  -0.00860   0.00000  -0.03938   0.00000
 135        9PX         1.79271   0.00000  -2.03615   0.00000  -1.19590
 136        9PY         0.75945   0.00000   0.08529   0.00000   0.13308
 137        9PZ         0.00000  -0.01229   0.00000   0.50313   0.00000
 138       10D 0       -0.22535   0.00000  -0.07438   0.00000   0.10997
 139       10D+1        0.00000   0.42750   0.00000  -0.52068   0.00000
 140       10D-1        0.00000   0.45937   0.00000   0.68575   0.00000
 141       10D+2       -0.45776   0.00000  -1.39466   0.00000  -0.73389
 142       10D-2        0.55829   0.00000   2.10048   0.00000   0.65804
 143       11D 0        0.03270   0.00000  -0.03604   0.00000  -0.01131
 144       11D+1        0.00000  -0.69238   0.00000   0.25187   0.00000
 145       11D-1        0.00000  -0.19997   0.00000  -0.08419   0.00000
 146       11D+2        0.00902   0.00000   0.17298   0.00000   0.20191
 147       11D-2       -0.00493   0.00000  -0.36322   0.00000  -0.19863
 148       12F 0        0.00000  -0.03191   0.00000  -0.00307   0.00000
 149       12F+1       -0.10283   0.00000   0.24919   0.00000   0.18826
 150       12F-1       -0.00191   0.00000   0.17596   0.00000   0.01975
 151       12F+2        0.00000  -0.01342   0.00000  -0.06095   0.00000
 152       12F-2        0.00000   0.05742   0.00000  -0.00538   0.00000
 153       12F+3       -0.04841   0.00000   0.19731   0.00000  -0.08193
 154       12F-3       -0.04917   0.00000   0.08277   0.00000   0.07085
 155 6   H  1S          0.00499   0.01911   0.01155  -0.00755  -0.00604
 156        2S          0.45814  -0.50046  -0.53092  -0.26211  -0.22394
 157        3S          0.04121  -0.01517   0.35441  -0.37365   0.01628
 158        4PX        -0.00959   0.00535  -0.01240  -0.00563   0.01635
 159        4PY        -0.00971   0.01492  -0.00803  -0.02692   0.02041
 160        4PZ        -0.00608   0.02141   0.02432   0.00910  -0.00294
 161        5PX         0.01590   0.14297   0.42619   0.11605  -0.06903
 162        5PY         0.12229  -0.29431   0.05319   0.43162  -0.32676
 163        5PZ         0.00972  -0.19762  -0.16726  -0.16877   0.20670
 164        6D 0       -0.00113   0.01241   0.01282  -0.00209  -0.00466
 165        6D+1       -0.00050  -0.00827  -0.01626   0.00488  -0.00484
 166        6D-1        0.00104   0.01665   0.00302  -0.01297   0.00188
 167        6D+2       -0.00274   0.00068  -0.00249   0.00124  -0.00219
 168        6D-2       -0.00220   0.01634   0.00314  -0.01226   0.00486
 169 7   H  1S         -0.01820  -0.01477   0.00287   0.02152   0.00523
 170        2S         -0.86211   0.72668   0.66685   0.41135   0.04354
 171        3S         -0.11043  -0.19633  -0.52634  -0.03778  -0.09154
 172        4PX        -0.00754   0.00700  -0.00306  -0.00066   0.00663
 173        4PY         0.00151  -0.01411  -0.00598   0.01137  -0.03022
 174        4PZ         0.01207  -0.01679  -0.02621   0.00319   0.00272
 175        5PX        -0.20259   0.17630   0.35239   0.15792  -0.08125
 176        5PY        -0.03210   0.31898   0.20722  -0.20894   0.50805
 177        5PZ        -0.06369   0.19934   0.26718  -0.10767  -0.03007
 178        6D 0        0.00556  -0.01690  -0.02342  -0.00679  -0.00180
 179        6D+1        0.00660   0.00183  -0.00947  -0.00797   0.00824
 180        6D-1       -0.00355  -0.01422  -0.00826   0.00163  -0.00706
 181        6D+2       -0.01602   0.00747   0.00631   0.00854  -0.00482
 182        6D-2        0.00232   0.02098   0.01095  -0.00410   0.01594
 183 8   H  1S         -0.01820   0.01477   0.00287  -0.02152   0.00523
 184        2S         -0.86211  -0.72668   0.66685  -0.41135   0.04354
 185        3S         -0.11043   0.19633  -0.52634   0.03778  -0.09154
 186        4PX        -0.00754  -0.00700  -0.00306   0.00066   0.00663
 187        4PY         0.00151   0.01411  -0.00598  -0.01137  -0.03022
 188        4PZ        -0.01207  -0.01679   0.02621   0.00319  -0.00272
 189        5PX        -0.20259  -0.17630   0.35239  -0.15792  -0.08125
 190        5PY        -0.03210  -0.31898   0.20722   0.20894   0.50805
 191        5PZ         0.06369   0.19934  -0.26718  -0.10767   0.03007
 192        6D 0        0.00556   0.01690  -0.02342   0.00679  -0.00180
 193        6D+1       -0.00660   0.00183   0.00947  -0.00797  -0.00824
 194        6D-1        0.00355  -0.01422   0.00826   0.00163   0.00706
 195        6D+2       -0.01602  -0.00747   0.00631  -0.00854  -0.00482
 196        6D-2        0.00232  -0.02098   0.01095   0.00410   0.01594
 197 9   H  1S          0.00499  -0.01911   0.01155   0.00755  -0.00604
 198        2S          0.45814   0.50046  -0.53092   0.26211  -0.22394
 199        3S          0.04121   0.01517   0.35441   0.37365   0.01628
 200        4PX        -0.00959  -0.00535  -0.01240   0.00563   0.01635
 201        4PY        -0.00971  -0.01492  -0.00803   0.02692   0.02041
 202        4PZ         0.00608   0.02141  -0.02432   0.00910   0.00294
 203        5PX         0.01590  -0.14297   0.42619  -0.11605  -0.06903
 204        5PY         0.12229   0.29431   0.05319  -0.43162  -0.32676
 205        5PZ        -0.00972  -0.19762   0.16726  -0.16877  -0.20670
 206        6D 0       -0.00113  -0.01241   0.01282   0.00209  -0.00466
 207        6D+1        0.00050  -0.00827   0.01626   0.00488   0.00484
 208        6D-1       -0.00104   0.01665  -0.00302  -0.01297  -0.00188
 209        6D+2       -0.00274  -0.00068  -0.00249  -0.00124  -0.00219
 210        6D-2       -0.00220  -0.01634   0.00314   0.01226   0.00486
 211 10  H  1S         -0.00609  -0.00435   0.00286  -0.00135  -0.01012
 212        2S          0.05395   0.14492   0.34428   0.02635   0.24960
 213        3S         -0.16611  -0.23155   0.03884  -0.03428  -0.12353
 214        4PX        -0.02586   0.01159   0.01078   0.04258  -0.01824
 215        4PY        -0.00353  -0.00237  -0.01128   0.00534  -0.01505
 216        4PZ        -0.00531  -0.00210  -0.00340   0.00422  -0.01025
 217        5PX         0.37709  -0.15552  -0.15629  -0.63930   0.31226
 218        5PY         0.00045  -0.07349  -0.04674  -0.09863   0.00394
 219        5PZ         0.10444   0.13220   0.14784  -0.07813   0.21187
 220        6D 0        0.00446   0.00200   0.00064  -0.00206  -0.00206
 221        6D+1        0.00502   0.00277  -0.00060  -0.00626  -0.00086
 222        6D-1       -0.00371  -0.00866  -0.00897   0.00227  -0.00768
 223        6D+2       -0.00277  -0.00384  -0.00464  -0.00196  -0.00697
 224        6D-2       -0.00681   0.00587   0.00800   0.00422  -0.02012
 225 11  H  1S         -0.00609   0.00435   0.00286   0.00135  -0.01012
 226        2S          0.05395  -0.14492   0.34428  -0.02635   0.24960
 227        3S         -0.16611   0.23155   0.03884   0.03428  -0.12353
 228        4PX        -0.02586  -0.01159   0.01078  -0.04258  -0.01824
 229        4PY        -0.00353   0.00237  -0.01128  -0.00534  -0.01505
 230        4PZ         0.00531  -0.00210   0.00340   0.00422   0.01025
 231        5PX         0.37709   0.15552  -0.15629   0.63930   0.31226
 232        5PY         0.00045   0.07349  -0.04674   0.09863   0.00394
 233        5PZ        -0.10444   0.13220  -0.14784  -0.07813  -0.21187
 234        6D 0        0.00446  -0.00200   0.00064   0.00206  -0.00206
 235        6D+1       -0.00502   0.00277   0.00060  -0.00626   0.00086
 236        6D-1        0.00371  -0.00866   0.00897   0.00227   0.00768
 237        6D+2       -0.00277   0.00384  -0.00464   0.00196  -0.00697
 238        6D-2       -0.00681  -0.00587   0.00800  -0.00422  -0.02012
 239 12  H  1S          0.00603   0.00000   0.00350   0.00000  -0.02035
 240        2S         -0.16794   0.00000  -1.34651   0.00000  -0.24458
 241        3S          0.62749   0.00000  -1.94338   0.00000  -0.81239
 242        4PX         0.04178   0.00000   0.03242   0.00000   0.00457
 243        4PY        -0.01096   0.00000   0.00976   0.00000   0.01955
 244        4PZ         0.00000   0.00492   0.00000  -0.01722   0.00000
 245        5PX        -0.62573   0.00000  -0.74241   0.00000  -0.13529
 246        5PY         0.06054   0.00000  -0.47787   0.00000  -0.32109
 247        5PZ         0.00000   0.04943   0.00000   0.23854   0.00000
 248        6D 0        0.00558   0.00000   0.01759   0.00000   0.00117
 249        6D+1        0.00000  -0.00074   0.00000   0.00045   0.00000
 250        6D-1        0.00000   0.01124   0.00000  -0.00548   0.00000
 251        6D+2       -0.00217   0.00000  -0.01032   0.00000  -0.00264
 252        6D-2       -0.00907   0.00000  -0.02564   0.00000  -0.00242
 253 13  H  1S         -0.00839   0.00000  -0.00217   0.00000   0.00287
 254        2S          0.17140   0.00000   1.08604   0.00000   0.55317
 255        3S         -0.72121   0.00000   1.87087   0.00000   1.26607
 256        4PX         0.02812   0.00000   0.03610   0.00000   0.00816
 257        4PY         0.04576   0.00000  -0.00897   0.00000  -0.02026
 258        4PZ         0.00000  -0.03525   0.00000  -0.01240   0.00000
 259        5PX        -0.38126   0.00000  -0.80379   0.00000  -0.35871
 260        5PY        -0.64016   0.00000   0.20383   0.00000   0.39052
 261        5PZ         0.00000   0.38202   0.00000   0.19853   0.00000
 262        6D 0       -0.00293   0.00000  -0.01543   0.00000  -0.00753
 263        6D+1        0.00000   0.00507   0.00000  -0.00657   0.00000
 264        6D-1        0.00000  -0.01047   0.00000   0.00750   0.00000
 265        6D+2       -0.00038   0.00000   0.01896   0.00000   0.00357
 266        6D-2        0.00146   0.00000   0.00138   0.00000  -0.01081
                          81        82        83        84        85
                           V         V         V         V         V
     Eigenvalues --     1.16244   1.16895   1.20400   1.21023   1.23466
   1 1   C  1S          0.00027   0.01024  -0.01425   0.00892   0.01031
   2        2S         -0.03756  -0.04462   0.08395  -0.01588   0.01762
   3        3S         -0.02386  -0.04003   0.00041  -0.00368   0.04597
   4        4S          1.01361  -1.74622  -0.11864   0.53052  -1.37532
   5        5PX         0.03810  -0.01263   0.00101   0.02889  -0.02306
   6        5PY         0.01026   0.06340  -0.05586  -0.02879  -0.01351
   7        5PZ         0.01580  -0.07191  -0.00732   0.03593   0.00305
   8        6PX         0.10479  -0.09064  -0.00439   0.08071  -0.15731
   9        6PY        -0.21528   0.31165  -0.28226   0.38173   0.25400
  10        6PZ         0.48309   0.29359   0.27216  -0.11059  -0.16919
  11        7PX         0.96816   0.06629   0.03280   0.41910   0.16528
  12        7PY         0.99327   0.77736  -0.60624  -3.28566   0.29294
  13        7PZ        -0.51270  -1.93059  -0.94098   2.22165  -0.35262
  14        8D 0        0.00030  -0.00695  -0.00681   0.00368   0.00917
  15        8D+1        0.00172   0.00529   0.00221   0.00493   0.00214
  16        8D-1       -0.00916  -0.01083   0.00018  -0.00147  -0.01358
  17        8D+2        0.00296  -0.01263   0.00731  -0.00942  -0.00410
  18        8D-2       -0.00106  -0.00117  -0.00109  -0.00506  -0.00177
  19        9D 0       -0.31235   0.31053   0.22619   0.29954  -0.22746
  20        9D+1       -0.01884  -0.03316   0.01825  -0.21525  -0.13062
  21        9D-1       -0.01523   0.38033  -0.12036   0.34997  -0.06749
  22        9D+2       -0.16005  -0.00715   0.00828   0.04895  -0.04377
  23        9D-2       -0.05368  -0.18022   0.07995   0.02732  -0.16629
  24       10F 0        0.01277  -0.02951  -0.01646  -0.01474   0.00971
  25       10F+1        0.00199  -0.00529   0.00236   0.01198  -0.00453
  26       10F-1       -0.00735  -0.00102  -0.00805   0.03528  -0.01374
  27       10F+2       -0.00591  -0.01577  -0.00279  -0.00797  -0.00874
  28       10F-2        0.00876  -0.00413   0.00878   0.00304  -0.00240
  29       10F+3       -0.01404   0.00644  -0.00107   0.00058   0.01102
  30       10F-3        0.00133  -0.01091   0.00294  -0.00435   0.00178
  31 2   C  1S         -0.00027   0.01024  -0.01425  -0.00892   0.01031
  32        2S          0.03756  -0.04462   0.08395   0.01588   0.01762
  33        3S          0.02386  -0.04003   0.00041   0.00368   0.04597
  34        4S         -1.01361  -1.74622  -0.11864  -0.53052  -1.37532
  35        5PX        -0.03810  -0.01263   0.00101  -0.02889  -0.02306
  36        5PY        -0.01026   0.06340  -0.05586   0.02879  -0.01351
  37        5PZ         0.01580   0.07191   0.00732   0.03593  -0.00305
  38        6PX        -0.10479  -0.09064  -0.00439  -0.08071  -0.15731
  39        6PY         0.21528   0.31165  -0.28226  -0.38173   0.25400
  40        6PZ         0.48309  -0.29359  -0.27216  -0.11059   0.16919
  41        7PX        -0.96816   0.06629   0.03280  -0.41910   0.16528
  42        7PY        -0.99327   0.77736  -0.60624   3.28566   0.29294
  43        7PZ        -0.51270   1.93059   0.94098   2.22165   0.35262
  44        8D 0       -0.00030  -0.00695  -0.00681  -0.00368   0.00917
  45        8D+1        0.00172  -0.00529  -0.00221   0.00493  -0.00214
  46        8D-1       -0.00916   0.01083  -0.00018  -0.00147   0.01358
  47        8D+2       -0.00296  -0.01263   0.00731   0.00942  -0.00410
  48        8D-2        0.00106  -0.00117  -0.00109   0.00506  -0.00177
  49        9D 0        0.31235   0.31053   0.22619  -0.29954  -0.22746
  50        9D+1       -0.01884   0.03316  -0.01825  -0.21525   0.13062
  51        9D-1       -0.01523  -0.38033   0.12036   0.34997   0.06749
  52        9D+2        0.16005  -0.00715   0.00828  -0.04895  -0.04377
  53        9D-2        0.05368  -0.18022   0.07995  -0.02732  -0.16629
  54       10F 0        0.01277   0.02951   0.01646  -0.01474  -0.00971
  55       10F+1       -0.00199  -0.00529   0.00236  -0.01198  -0.00453
  56       10F-1        0.00735  -0.00102  -0.00805  -0.03528  -0.01374
  57       10F+2       -0.00591   0.01577   0.00279  -0.00797   0.00874
  58       10F-2        0.00876   0.00413  -0.00878   0.00304   0.00240
  59       10F+3        0.01404   0.00644  -0.00107  -0.00058   0.01102
  60       10F-3       -0.00133  -0.01091   0.00294   0.00435   0.00178
  61 3   C  1S          0.01349  -0.01829   0.00659   0.00058  -0.00721
  62        2S         -0.17645   0.07993   0.05637  -0.05035  -0.00699
  63        3S         -0.09844   0.00133   0.05143  -0.04822  -0.00341
  64        4S          1.95645   2.75828  -2.50295   3.72363   0.10162
  65        5PX         0.01440  -0.00366   0.00329  -0.00782  -0.03761
  66        5PY         0.01837  -0.00543  -0.04283   0.04771   0.08480
  67        5PZ        -0.00621   0.02127  -0.04364  -0.05080   0.05008
  68        6PX         0.05445   0.00086  -0.13011  -0.10960  -0.38349
  69        6PY         0.01236   0.27758  -0.02309   0.00087   0.19568
  70        6PZ         0.02863   0.18969  -0.12903  -0.38577   0.08653
  71        7PX         0.95827  -0.18078  -0.22703   0.11387  -1.14898
  72        7PY        -0.98447   1.02564   1.02487   1.79458   1.75871
  73        7PZ         2.29259   0.45707  -2.52672   0.23685   0.48894
  74        8D 0        0.00939  -0.00953  -0.02085   0.00728  -0.00311
  75        8D+1       -0.00008   0.00302  -0.00043   0.00635  -0.00301
  76        8D-1       -0.00424   0.01499  -0.00525   0.01350   0.00540
  77        8D+2        0.00440   0.00398  -0.01376   0.01123  -0.00202
  78        8D-2       -0.00390  -0.00222  -0.00261   0.00390   0.00112
  79        9D 0        0.43842   0.28126   0.04501   0.06468  -0.06251
  80        9D+1        0.11474  -0.09332   0.07076  -0.19992   0.58709
  81        9D-1       -0.13543  -0.44400   0.17942  -0.34300   0.16902
  82        9D+2       -0.31361   0.01421   0.40427   0.53738  -0.00042
  83        9D-2        0.03426   0.12601   0.17360   0.09661   0.19625
  84       10F 0       -0.01192   0.01230   0.01949   0.02113  -0.00254
  85       10F+1        0.00585   0.00454  -0.00378   0.01436  -0.00110
  86       10F-1       -0.00598   0.00191  -0.00300   0.01207   0.00148
  87       10F+2       -0.01662   0.00744   0.00755  -0.01976  -0.00430
  88       10F-2        0.00238  -0.00841  -0.00196  -0.01057  -0.00336
  89       10F+3        0.00572   0.00707  -0.00208  -0.00682  -0.02424
  90       10F-3       -0.00914   0.02589   0.00303   0.02511  -0.00591
  91 4   C  1S         -0.01349  -0.01829   0.00659  -0.00058  -0.00721
  92        2S          0.17645   0.07993   0.05637   0.05035  -0.00699
  93        3S          0.09844   0.00133   0.05143   0.04822  -0.00341
  94        4S         -1.95645   2.75828  -2.50295  -3.72363   0.10162
  95        5PX        -0.01440  -0.00366   0.00329   0.00782  -0.03761
  96        5PY        -0.01837  -0.00543  -0.04283  -0.04771   0.08480
  97        5PZ        -0.00621  -0.02127   0.04364  -0.05080  -0.05008
  98        6PX        -0.05445   0.00086  -0.13011   0.10960  -0.38349
  99        6PY        -0.01236   0.27758  -0.02309  -0.00087   0.19568
 100        6PZ         0.02863  -0.18969   0.12903  -0.38577  -0.08653
 101        7PX        -0.95827  -0.18078  -0.22703  -0.11387  -1.14898
 102        7PY         0.98447   1.02564   1.02487  -1.79458   1.75871
 103        7PZ         2.29259  -0.45707   2.52672   0.23685  -0.48894
 104        8D 0       -0.00939  -0.00953  -0.02085  -0.00728  -0.00311
 105        8D+1       -0.00008  -0.00302   0.00043   0.00635   0.00301
 106        8D-1       -0.00424  -0.01499   0.00525   0.01350  -0.00540
 107        8D+2       -0.00440   0.00398  -0.01376  -0.01123  -0.00202
 108        8D-2        0.00390  -0.00222  -0.00261  -0.00390   0.00112
 109        9D 0       -0.43842   0.28126   0.04501  -0.06468  -0.06251
 110        9D+1        0.11474   0.09332  -0.07076  -0.19992  -0.58709
 111        9D-1       -0.13543   0.44400  -0.17942  -0.34300  -0.16902
 112        9D+2        0.31361   0.01421   0.40427  -0.53738  -0.00042
 113        9D-2       -0.03426   0.12601   0.17360  -0.09661   0.19625
 114       10F 0       -0.01192  -0.01230  -0.01949   0.02113   0.00254
 115       10F+1       -0.00585   0.00454  -0.00378  -0.01436  -0.00110
 116       10F-1        0.00598   0.00191  -0.00300  -0.01207   0.00148
 117       10F+2       -0.01662  -0.00744  -0.00755  -0.01976   0.00430
 118       10F-2        0.00238   0.00841   0.00196  -0.01057   0.00336
 119       10F+3       -0.00572   0.00707  -0.00208   0.00682  -0.02424
 120       10F-3        0.00914   0.02589   0.00303  -0.02511  -0.00591
 121 5   Si 1S          0.00000  -0.01320   0.01452   0.00000  -0.00147
 122        2S          0.00000  -0.03003  -0.04507   0.00000   0.00639
 123        3S          0.00000  -0.34727   0.21421   0.00000  -0.02808
 124        4S          0.00000   0.11641   0.16279   0.00000  -0.02057
 125        5S          0.00000  -1.60213   3.03049   0.00000   1.21478
 126        6PX         0.00000  -0.01231   0.00795   0.00000  -0.00674
 127        6PY         0.00000   0.04474  -0.03698   0.00000  -0.00863
 128        6PZ         0.01618   0.00000   0.00000   0.04889   0.00000
 129        7PX         0.00000  -0.23230  -0.26770   0.00000   0.09874
 130        7PY         0.00000  -0.50809   1.72947   0.00000   0.57060
 131        7PZ         1.26226   0.00000   0.00000  -0.36654   0.00000
 132        8PX         0.00000   0.01803   0.00118   0.00000   0.00596
 133        8PY         0.00000  -0.02122  -0.01667   0.00000  -0.01376
 134        8PZ        -0.06216   0.00000   0.00000  -0.01751   0.00000
 135        9PX         0.00000  -0.39432  -0.42401   0.00000   0.50390
 136        9PY         0.00000  -1.26511   2.58093   0.00000   0.40848
 137        9PZ         1.57915   0.00000   0.00000  -0.56393   0.00000
 138       10D 0        0.00000   0.65721   1.44054   0.00000   1.17864
 139       10D+1       -0.12055   0.00000   0.00000  -0.40877   0.00000
 140       10D-1        1.48446   0.00000   0.00000   0.20908   0.00000
 141       10D+2        0.00000   0.48585  -0.90993   0.00000   0.46350
 142       10D-2        0.00000   1.01858  -0.72161   0.00000  -0.48158
 143       11D 0        0.00000  -0.27581  -0.48725   0.00000  -0.15100
 144       11D+1        0.12448   0.00000   0.00000   0.05997   0.00000
 145       11D-1       -0.37848   0.00000   0.00000   0.13250   0.00000
 146       11D+2        0.00000  -0.20225   0.20028   0.00000   0.17381
 147       11D-2        0.00000  -0.25390   0.18154   0.00000   0.08045
 148       12F 0        0.00114   0.00000   0.00000   0.13647   0.00000
 149       12F+1        0.00000   0.11511  -0.06592   0.00000  -0.04588
 150       12F-1        0.00000  -0.03452   0.22238   0.00000   0.01222
 151       12F+2       -0.14104   0.00000   0.00000   0.03114   0.00000
 152       12F-2       -0.13546   0.00000   0.00000   0.02158   0.00000
 153       12F+3        0.00000  -0.02030  -0.14080   0.00000  -0.18214
 154       12F-3        0.00000   0.04751   0.18724   0.00000   0.03160
 155 6   H  1S          0.02932   0.00463   0.01444  -0.00827  -0.01835
 156        2S          0.06489  -0.27185  -0.13784   0.85018   1.06159
 157        3S         -0.38372   0.31357  -0.59255  -0.03774   0.17989
 158        4PX        -0.00746  -0.00457  -0.00709  -0.01793  -0.02595
 159        4PY         0.00810   0.01930   0.00149  -0.01953   0.02762
 160        4PZ         0.01568   0.00809   0.01954  -0.01602  -0.00271
 161        5PX         0.05837   0.12570   0.10094   0.02919   0.15133
 162        5PY        -0.15804  -0.38591  -0.04772   0.34805  -0.35577
 163        5PZ        -0.29125  -0.14676  -0.35839  -0.03663  -0.15091
 164        6D 0       -0.00578   0.01037   0.00007   0.00383   0.00480
 165        6D+1        0.01201   0.00543   0.01628   0.01013   0.00179
 166        6D-1       -0.00065   0.02175   0.00498  -0.01410   0.00593
 167        6D+2        0.00814  -0.00275  -0.00669  -0.00391   0.00569
 168        6D-2        0.00127   0.01581   0.00045  -0.01224   0.00377
 169 7   H  1S          0.02925   0.00953   0.02572  -0.02059   0.00035
 170        2S         -0.28016  -0.10899  -0.36368   0.58735  -0.80536
 171        3S         -0.54989   0.08756  -0.50705  -0.04980  -0.07860
 172        4PX         0.00061   0.00658   0.00293   0.00799  -0.03715
 173        4PY        -0.00237   0.00455   0.00019  -0.02680   0.02621
 174        4PZ         0.01575   0.00557   0.03264  -0.01257  -0.01483
 175        5PX        -0.02645  -0.00787  -0.21042   0.08158   0.21499
 176        5PY        -0.00550  -0.08622  -0.06528   0.50538  -0.44539
 177        5PZ        -0.28138  -0.16390  -0.44251  -0.04372   0.39459
 178        6D 0       -0.00554  -0.00039  -0.00033  -0.00271   0.00440
 179        6D+1       -0.00312  -0.00941  -0.00855  -0.01994   0.00575
 180        6D-1        0.00335   0.00658  -0.00115  -0.00887   0.00423
 181        6D+2        0.00993   0.00190  -0.00692  -0.00566  -0.00932
 182        6D-2        0.00067  -0.00858  -0.00230   0.01305  -0.00402
 183 8   H  1S         -0.02925   0.00953   0.02572   0.02059   0.00035
 184        2S          0.28016  -0.10899  -0.36368  -0.58735  -0.80536
 185        3S          0.54989   0.08756  -0.50705   0.04980  -0.07860
 186        4PX        -0.00061   0.00658   0.00293  -0.00799  -0.03715
 187        4PY         0.00237   0.00455   0.00019   0.02680   0.02621
 188        4PZ         0.01575  -0.00557  -0.03264  -0.01257   0.01483
 189        5PX         0.02645  -0.00787  -0.21042  -0.08158   0.21499
 190        5PY         0.00550  -0.08622  -0.06528  -0.50538  -0.44539
 191        5PZ        -0.28138   0.16390   0.44251  -0.04372  -0.39459
 192        6D 0        0.00554  -0.00039  -0.00033   0.00271   0.00440
 193        6D+1       -0.00312   0.00941   0.00855  -0.01994  -0.00575
[truncated: 4,412,092 more chars]
