# Supplementary material for: The molecular structure and curious motions in 1,1-difluorosilacyclopent-3-ene and silacyclopent-3-ene as determined by microwave spectroscopy and quantum chemical calculations
Source: Royal Society of Chemistry journal article supplement (doi:10.1039/d1cp04286f), 2022-01-01
Supplement: d1cp04286f3.pdf [file d1cp04286f3.pdf]

## Supplemental Data

### Fits and Analyses

11dfscp3ene Separate

---

|                                          | obs     | o-c     | error      | blends        | Notes        |
|------------------------------------------|---------|---------|------------|---------------|--------------|
|                                          |         | o-c     | wt         |               |              |
| / instead of : below denotes (o-c)>3*err |         |         |            |               |              |
| 1:                                       | 2 1 2 0 | 1 1 1 0 | 6917.0167  | 0.0086 0.010  |              |
| 2:                                       | 2 1 2 1 | 1 1 1 1 | 6917.0190  | -0.0174 0.010 |              |
| 3:                                       | 2 0 2 0 | 1 0 1 0 | 7005.3453  | -0.0010 0.010 |              |
| 4:                                       | 2 0 2 1 | 1 0 1 1 | 7005.3468  | -0.0140 0.010 |              |
| 5:                                       | 2 1 1 0 | 1 1 0 0 | 7100.6875  | -0.0067 0.010 |              |
| 6:                                       | 3 2 2 0 | 3 0 3 0 | 7186.1321  | -0.0037 0.010 |              |
| 7:                                       | 4 2 3 0 | 4 0 4 0 | 7218.1642  | -0.0057 0.010 |              |
| 8:                                       | 5 2 4 0 | 5 0 5 0 | 7279.1347  | 0.0066 0.010  |              |
| 9:                                       | 2 1 2 0 | 1 1 1 0 | 6917.0151  | 0.0070 0.010  | -0.0072 0.50 |
| 10:                                      | 2 1 2 1 | 1 1 1 1 | 6917.0151  | -0.0214 0.010 | -0.0072 0.50 |
| 11:                                      | 2 0 2 0 | 1 0 1 0 | 7005.3482  | 0.0018 0.010  | -0.0054 0.50 |
| 12:                                      | 2 0 2 1 | 1 0 1 1 | 7005.3482  | -0.0126 0.010 | -0.0054 0.50 |
| 13:                                      | 2 1 1 0 | 1 1 0 0 | 7100.6825  | -0.0117 0.010 |              |
| 14:                                      | 3 2 2 0 | 3 0 3 0 | 7186.1321  | -0.0037 0.010 |              |
| 15:                                      | 4 2 3 0 | 4 0 4 0 | 7218.1618  | -0.0082 0.010 |              |
| 16:                                      | 5 2 4 0 | 5 0 5 0 | 7279.1432  | 0.0151 0.010  |              |
| 17:                                      | 3 1 3 0 | 2 1 2 0 | 10373.3425 | 0.0075 0.010  |              |
| 18:                                      | 3 0 3 0 | 2 0 2 0 | 10499.2285 | 0.0081 0.010  |              |
| 19:                                      | 3 2 2 0 | 2 2 1 0 | 10513.1606 | 0.0051 0.010  |              |
| 20:                                      | 3 2 1 0 | 2 2 0 0 | 10527.2463 | 0.0080 0.010  |              |

---

|     |                 |            |         |       |         |      |
|-----|-----------------|------------|---------|-------|---------|------|
| 21: | 3 1 2 0 2 1 1 0 | 10648.7744 | -0.0049 | 0.010 |         |      |
| 22: | 4 1 4 0 3 1 3 0 | 13827.1864 | 0.0204  | 0.010 | -0.0073 | 0.50 |
| 23: | 4 1 4 1 3 1 3 1 | 13827.1864 | -0.0351 | 0.010 | -0.0073 | 0.50 |
| 24: | 4 0 4 0 3 0 3 0 | 13982.7281 | -0.0056 | 0.010 |         |      |
| 25: | 4 2 3 0 3 2 2 0 | 14014.7855 | 0.0175  | 0.010 |         |      |
| 26: | 4 3 2 0 3 3 1 0 | 14024.1248 | -0.0011 | 0.010 |         |      |
| 27: | 4 3 1 0 3 3 0 0 | 14024.6266 | 0.0096  | 0.010 |         |      |
| 28: | 4 2 2 0 3 2 1 0 | 14049.7693 | 0.0187  | 0.010 | 0.0221  | 0.50 |
| 29: | 4 2 2 1 3 2 1 1 | 14049.7693 | 0.0256  | 0.010 | 0.0221  | 0.50 |
| 30: | 4 1 3 1 3 1 2 1 | 14194.0110 | 0.0127  | 0.010 | -0.0029 | 0.50 |
| 31: | 4 1 3 0 3 1 2 0 | 14194.0110 | -0.0184 | 0.010 | -0.0029 | 0.50 |
| 32: | 5 1 5 0 4 1 4 0 | 17277.9158 | 0.0568  | 0.010 | 0.0204  | 0.50 |
| 33: | 5 1 5 1 4 1 4 1 | 17277.9158 | -0.0160 | 0.010 | 0.0204  | 0.50 |
| 34: | 5 0 5 0 4 0 4 0 | 17453.0393 | -0.0097 | 0.010 |         |      |
| 35: | 5 0 5 1 4 0 4 1 | 17453.1552 | 0.0004  | 0.010 |         |      |
| 36: | 5 2 4 0 4 2 3 0 | 17513.9781 | -0.0290 | 0.010 |         |      |
| 37: | 5 2 4 1 4 2 3 1 | 17514.0783 | 0.0173  | 0.010 |         |      |
| 38: | 5 4 2 1 4 4 1 1 | 17529.0060 | -0.0176 | 0.010 |         |      |

-----

PARAMETERS IN FIT (values truncated and Nlines statistics):

|       |          |               |   |
|-------|----------|---------------|---|
| 10000 | A /MHz   | 3544.4238(21) | 1 |
| 20000 | B /MHz   | 1798.1419(16) | 2 |
| 30000 | C /MHz   | 1706.2987(19) | 3 |
| 299   | DJ /kHz  | 0.201(25)     | 4 |
| 1199  | DJK /kHz | 5.873(92)     | 5 |
| 10011 | A /MHz   | 3545.23(46)   | 6 |

|        |          |               |    |
|--------|----------|---------------|----|
| 20011  | B /MHz   | 1798.1357(38) | 7  |
| 30011  | C /MHz   | 1706.3101(26) | 8  |
| 210001 | Fbc /MHz | 0.68(11)      | 9  |
| 11     | E1 /MHz  | 13006.(510)   | 10 |

MICROWAVE AVG = -0.000519 MHz, IR AVG = 0.00000  
 MICROWAVE RMS = 0.011774 MHz, IR RMS = 0.00000  
 END OF ITERATION 1 OLD, NEW RMS ERROR= 1.17742 1.17742

distinct frequency lines in fit: 32

distinct parameters of fit: 10

| MICROWAVE range | lines fitted | lines | lines   | RMS     | RMS ERROR | J range  | Ka range | freq.              |
|-----------------|--------------|-------|---------|---------|-----------|----------|----------|--------------------|
|                 | total        | dv=0  | dv.ne.0 | UNFITTD | e>900     |          |          |                    |
| v"= 0           | 26           | 26    | 0       | 0       | 0         | 0.011266 | 1.12664  | 1 5 0 3 6917 17514 |
| v"= 1           | 6            | 6     | 0       | 0       | 0         | 0.013639 | 1.36387  | 1 5 0 4 6917 17529 |
| -----           |              |       |         |         |           |          |          |                    |
| total:          | 32           | 32    | 0       | 0       | 0         | 0.011748 | 1.17478  |                    |

NOTE: the RMS values above are for Nlines statistics, but the 'total' values may differ slightly from those in the .FIT file since the o-c values for this evaluation are as rounded in the .FIT.

PARAMETERS IN FIT WITH STANDARD ERRORS ON THOSE THAT ARE FITTED:

(values rounded and degrees of freedom, Ndegf=Nlines-Nconst, statistics)

|       |        |               |   |
|-------|--------|---------------|---|
| 10000 | A /MHz | 3544.4239(30) | 1 |
|-------|--------|---------------|---|

|        |          |               |    |
|--------|----------|---------------|----|
| 20000  | B /MHz   | 1798.1419(23) | 2  |
| 30000  | C /MHz   | 1706.2988(27) | 3  |
| 299    | DJ /kHz  | 0.201(36)     | 4  |
| 1199   | DJK /kHz | 5.87(13)      | 5  |
| 10011  | A /MHz   | 3545.23(65)   | 6  |
| 20011  | B /MHz   | 1798.1357(53) | 7  |
| 30011  | C /MHz   | 1706.3102(37) | 8  |
| 210001 | Fbc /MHz | 0.68(16)      | 9  |
| 11     | E1 /MHz  | 13006.(724)   | 10 |

-----  
Worst fitted constants, with greater than 20% uncertainty: %

|        |          |          |   |      |
|--------|----------|----------|---|------|
| 210001 | Fbc /MHz | 0.68(16) | 9 | 23.7 |
|--------|----------|----------|---|------|

-----

CORRELATION COEFFICIENTS, C.ij:

|      | A       | B       | C       | -DJ     | -DJK   | A      | B | C |
|------|---------|---------|---------|---------|--------|--------|---|---|
| A    | 1.0000  |         |         |         |        |        |   |   |
| B    | 0.1035  | 1.0000  |         |         |        |        |   |   |
| C    | 0.1674  | -0.6544 | 1.0000  |         |        |        |   |   |
| -DJ  | -0.0519 | 0.1311  | -0.7375 | 1.0000  |        |        |   |   |
| -DJK | -0.5554 | -0.2623 | 0.2744  | -0.2528 | 1.0000 |        |   |   |
| A    | -0.2469 | -0.3943 | 0.5300  | -0.4740 | 0.3138 | 1.0000 |   |   |

|     |         |         |         |         |         |         |         |
|-----|---------|---------|---------|---------|---------|---------|---------|
| B   | 0.2506  | -0.3141 | 0.5264  | -0.4625 | -0.2849 | 0.4727  | 1.0000  |
| C   | -0.0181 | 0.4082  | -0.2389 | -0.0829 | 0.0232  | -0.4992 | -0.6754 |
| Fbc | 0.2616  | 0.3453  | -0.3940 | 0.4112  | 0.1576  | -0.5005 | -0.4920 |
| E1  | 0.0261  | -0.2312 | 0.2273  | -0.2420 | -0.4966 | 0.2740  | 0.5636  |

Fbc E1

Fbc 1.0000

E1 -0.7338 1.0000

Mean value of |C.ij|, i.ne.j = 0.3362

Mean value of C.ij, i.ne.j = -0.0854

No correlations with absolute value greater than 0.9950

Worst fitted lines (obs-calc/error):

|          |          |          |          |
|----------|----------|----------|----------|
| 36: -2.9 | 28: 2.2  | 32: 2.0  | 38: -1.8 |
| 25: 1.8  | 2: -1.7  | 37: 1.7  | 16: 1.5  |
| 4: -1.4  | 13: -1.2 | 34: -1.0 | 27: 1.0  |
| 1: 0.9   | 15: -0.8 | 18: 0.8  | 20: 0.8  |
| 17: 0.8  | 22: -0.7 | 9: -0.7  | 5: -0.7  |
| 8: 0.7   | 7: -0.6  | 24: -0.6 | 11: -0.5 |
| 19: 0.5  | 21: -0.5 | 6: -0.4  | 14: -0.4 |
| 30: -0.3 | 26: -0.1 | 3: -0.1  | 35: 0.0  |
| 33: 0.0  | 31: 0.0  | 29: 0.0  | 23: 0.0  |
| 12: 0.0  | 10: 0.0  |          |          |

|     |         |         |            |         |                   |
|-----|---------|---------|------------|---------|-------------------|
| 36: | 5 2 4 0 | 4 2 3 0 | 17513.9781 | -0.0290 | 0.010             |
| 28: | 4 2 2 0 | 3 2 1 0 | 14049.7693 | 0.0187  | 0.010 0.0221 0.50 |
| 32: | 5 1 5 0 | 4 1 4 0 | 17277.9158 | 0.0568  | 0.010 0.0204 0.50 |
| 38: | 5 4 2 1 | 4 4 1 1 | 17529.0060 | -0.0176 | 0.010             |
| 25: | 4 2 3 0 | 3 2 2 0 | 14014.7855 | 0.0175  | 0.010             |
| 2:  | 2 1 2 1 | 1 1 1 1 | 6917.0190  | -0.0174 | 0.010             |
| 37: | 5 2 4 1 | 4 2 3 1 | 17514.0783 | 0.0173  | 0.010             |
| 16: | 5 2 4 0 | 5 0 5 0 | 7279.1432  | 0.0151  | 0.010             |
| 4:  | 2 0 2 1 | 1 0 1 1 | 7005.3468  | -0.0140 | 0.010             |
| 13: | 2 1 1 0 | 1 1 0 0 | 7100.6825  | -0.0117 | 0.010             |

---

/ SPFIT output reformatted with PIFORM

11dfscp3ene Together

---

|  | obs | o-c | error | blends | Notes |
|--|-----|-----|-------|--------|-------|
|  |     |     | o-c   | wt     |       |

/ instead of : below denotes (o-c)>3\*err

---

|    |         |         |           |         |       |
|----|---------|---------|-----------|---------|-------|
| 1: | 2 1 2 0 | 1 1 1 0 | 6917.0167 | 0.0025  | 0.010 |
| 2: | 2 1 2 1 | 1 1 1 1 | 6917.0190 | 0.0039  | 0.010 |
| 3: | 2 0 2 0 | 1 0 1 0 | 7005.3453 | -0.0020 | 0.010 |
| 4: | 2 0 2 1 | 1 0 1 1 | 7005.3468 | -0.0029 | 0.010 |
| 5: | 2 1 1 0 | 1 1 0 0 | 7100.6875 | -0.0022 | 0.010 |
| 6: | 3 2 2 0 | 3 0 3 0 | 7186.1321 | -0.0176 | 0.010 |
| 7: | 4 2 3 0 | 4 0 4 0 | 7218.1642 | -0.0095 | 0.010 |
| 8: | 5 2 4 0 | 5 0 5 0 | 7279.1347 | 0.0244  | 0.010 |

|                     |            |         |       |         |      |
|---------------------|------------|---------|-------|---------|------|
| 9: 2 1 2 0 1 1 1 0  | 6917.0151  | 0.0009  | 0.010 | 0.0004  | 0.50 |
| 10: 2 1 2 1 1 1 1 1 | 6917.0151  | 0.0000  | 0.010 | 0.0004  | 0.50 |
| 11: 2 0 2 0 1 0 1 0 | 7005.3482  | 0.0008  | 0.010 | -0.0004 | 0.50 |
| 12: 2 0 2 1 1 0 1 1 | 7005.3482  | -0.0015 | 0.010 | -0.0004 | 0.50 |
| 13: 2 1 1 0 1 1 0 0 | 7100.6825  | -0.0071 | 0.010 |         |      |
| 14: 3 2 2 0 3 0 3 0 | 7186.1321  | -0.0176 | 0.010 |         |      |
| 15: 4 2 3 0 4 0 4 0 | 7218.1618  | -0.0120 | 0.010 |         |      |
| 16/ 5 2 4 0 5 0 5 0 | 7279.1432  | 0.0330  | 0.010 |         |      |
| 17: 3 1 3 0 2 1 2 0 | 10373.3425 | -0.0036 | 0.010 |         |      |
| 18: 3 0 3 0 2 0 2 0 | 10499.2285 | 0.0037  | 0.010 |         |      |
| 19: 3 2 2 0 2 2 1 0 | 10513.1606 | 0.0041  | 0.010 |         |      |
| 20: 3 2 1 0 2 2 0 0 | 10527.2463 | 0.0049  | 0.010 |         |      |
| 21: 3 1 2 0 2 1 1 0 | 10648.7744 | 0.0000  | 0.010 |         |      |
| 22: 4 1 4 0 3 1 3 0 | 13827.1864 | 0.0015  | 0.010 | 0.0022  | 0.50 |
| 23: 4 1 4 1 3 1 3 1 | 13827.1864 | 0.0028  | 0.010 | 0.0022  | 0.50 |
| 24: 4 0 4 0 3 0 3 0 | 13982.7281 | -0.0169 | 0.010 |         |      |
| 25: 4 2 3 0 3 2 2 0 | 14014.7855 | 0.0163  | 0.010 |         |      |
| 26: 4 3 2 0 3 3 1 0 | 14024.1248 | -0.0038 | 0.010 |         |      |
| 27: 4 3 1 0 3 3 0 0 | 14024.6266 | -0.0022 | 0.010 |         |      |
| 28: 4 2 2 0 3 2 1 0 | 14049.7693 | 0.0119  | 0.010 | 0.0126  | 0.50 |
| 29: 4 2 2 1 3 2 1 1 | 14049.7693 | 0.0133  | 0.010 | 0.0126  | 0.50 |
| 30: 4 1 3 1 3 1 2 1 | 14194.0110 | -0.0066 | 0.010 | -0.0112 | 0.50 |
| 31: 4 1 3 0 3 1 2 0 | 14194.0110 | -0.0156 | 0.010 | -0.0112 | 0.50 |
| 32: 5 1 5 0 4 1 4 0 | 17277.9158 | 0.0267  | 0.010 | 0.0273  | 0.50 |
| 33: 5 1 5 1 4 1 4 1 | 17277.9158 | 0.0279  | 0.010 | 0.0273  | 0.50 |
| 34/ 5 0 5 0 4 0 4 0 | 17453.0393 | -0.0325 | 0.010 |         |      |
| 35/ 5 0 5 1 4 0 4 1 | 17453.1552 | 0.0354  | 0.010 |         |      |
| 36/ 5 2 4 0 4 2 3 0 | 17513.9781 | -0.0301 | 0.010 |         |      |
| 37: 5 2 4 1 4 2 3 1 | 17514.0783 | 0.0256  | 0.010 |         |      |
| 38: 5 4 2 1 4 4 1 1 | 17529.0060 | -0.0255 | 0.010 |         |      |

PARAMETERS IN FIT (values truncated and Nlines statistics):

|        |          |               |   |
|--------|----------|---------------|---|
| 10099  | A /MHz   | 3544.4280(19) | 1 |
| 20099  | B /MHz   | 1798.1391(12) | 2 |
| 30099  | C /MHz   | 1706.3013(13) | 3 |
| 299    | DJ /kHz  | 0.161(21)     | 4 |
| 1199   | DJK /kHz | 5.818(79)     | 5 |
| 210001 | Fbc /MHz | 0.861(72)     | 6 |
| 11     | E1 /MHz  | 11799.(749)   | 7 |

MICROWAVE AVG = -0.000031 MHz, IR AVG = 0.00000  
 MICROWAVE RMS = 0.016637 MHz, IR RMS = 0.00000  
 END OF ITERATION 1 OLD, NEW RMS ERROR= 1.66374 1.66374

distinct frequency lines in fit: 32  
 distinct parameters of fit: 7

| MICROWAVE range | lines fitted | lines   | lines   | lines | RMS      | RMS ERROR | J range | Ka range | freq. |
|-----------------|--------------|---------|---------|-------|----------|-----------|---------|----------|-------|
| total           | dv=0         | dv.ne.0 | UNFITTD | e>900 |          |           |         |          |       |
| v"= 0           | 26           | 26      | 0       | 0     | 0.015337 | 1.53370   | 1 5 0 3 | 6917     | 17514 |
| v"= 1           | 6            | 6       | 0       | 0     | 0.021240 | 2.12396   | 1 5 0 4 | 6917     | 17529 |
| total:          | 32           | 32      | 0       | 0     | 0.016604 | 1.66043   |         |          |       |

NOTE: the RMS values above are for Nlines statistics, but the 'total' values may differ slightly from



those in the .FIT file since the o-c values for this evaluation are as rounded in the .FIT.

PARAMETERS IN FIT WITH STANDARD ERRORS ON THOSE THAT ARE FITTED:

(values rounded and degrees of freedom, Ndegf=Nlines-Nconst, statistics)

|        |          |               |   |
|--------|----------|---------------|---|
| 10099  | A /MHz   | 3544.4280(35) | 1 |
| 20099  | B /MHz   | 1798.1391(23) | 2 |
| 30099  | C /MHz   | 1706.3013(25) | 3 |
| 299    | DJ /kHz  | 0.162(40)     | 4 |
| 1199   | DJK /kHz | 5.82(14)      | 5 |
| 210001 | Fbc /MHz | 0.86(13)      | 6 |
| 11     | E1 /MHz  | 11799.(1409)  | 7 |

-----  
Worst fitted constants, with greater than 20% uncertainty: %

|     |         |           |   |      |
|-----|---------|-----------|---|------|
| 299 | DJ /kHz | 0.162(40) | 4 | 24.9 |
|-----|---------|-----------|---|------|

-----

CORRELATION COEFFICIENTS, C.ij:

|     | A       | B       | C       | -DJ    | -DJK | Fbc | E1 |
|-----|---------|---------|---------|--------|------|-----|----|
| A   | 1.0000  |         |         |        |      |     |    |
| B   | 0.2881  | 1.0000  |         |        |      |     |    |
| C   | 0.1957  | -0.3504 | 1.0000  |        |      |     |    |
| -DJ | -0.1510 | -0.2017 | -0.7392 | 1.0000 |      |     |    |

|      |         |         |         |         |         |        |        |
|------|---------|---------|---------|---------|---------|--------|--------|
| -DJK | -0.5044 | -0.3132 | 0.3200  | -0.4272 | 1.0000  |        |        |
| Fbc  | 0.3335  | 0.1211  | -0.1794 | 0.2246  | -0.3261 | 1.0000 |        |
| E1   | 0.0971  | -0.0409 | -0.0668 | 0.2832  | -0.5499 | 0.6489 | 1.0000 |

Mean value of |C.ij|, i.ne.j = 0.3030

Mean value of C.ij, i.ne.j = -0.0637

No correlations with absolute value greater than 0.9950

Worst fitted lines (obs-calc/error):

|          |          |          |          |
|----------|----------|----------|----------|
| 35: 3.5  | 16: 3.3  | 34: -3.2 | 36: -3.0 |
| 32: 2.7  | 37: 2.6  | 38: -2.5 | 8: 2.4   |
| 6: -1.8  | 14: -1.8 | 24: -1.7 | 25: 1.6  |
| 28: 1.3  | 15: -1.2 | 30: -1.1 | 7: -0.9  |
| 13: -0.7 | 20: 0.5  | 19: 0.4  | 2: 0.4   |
| 26: -0.4 | 18: 0.4  | 17: -0.4 | 4: -0.3  |
| 1: 0.2   | 27: -0.2 | 5: -0.2  | 22: 0.2  |
| 3: -0.2  | 9: 0.0   | 11: 0.0  | 33: 0.0  |
| 31: 0.0  | 29: 0.0  | 23: 0.0  | 21: 0.0  |
| 12: 0.0  | 10: 0.0  |          |          |

|             |         |            |         |       |             |
|-------------|---------|------------|---------|-------|-------------|
| 35/ 5 0 5 1 | 4 0 4 1 | 17453.1552 | 0.0354  | 0.010 |             |
| 16/ 5 2 4 0 | 5 0 5 0 | 7279.1432  | 0.0330  | 0.010 |             |
| 34/ 5 0 5 0 | 4 0 4 0 | 17453.0393 | -0.0325 | 0.010 |             |
| 36/ 5 2 4 0 | 4 2 3 0 | 17513.9781 | -0.0301 | 0.010 |             |
| 32: 5 1 5 0 | 4 1 4 0 | 17277.9158 | 0.0267  | 0.010 | 0.0273 0.50 |
| 37: 5 2 4 1 | 4 2 3 1 | 17514.0783 | 0.0256  | 0.010 |             |

|     |                 |            |         |       |
|-----|-----------------|------------|---------|-------|
| 38: | 5 4 2 1 4 4 1 1 | 17529.0060 | -0.0255 | 0.010 |
| 8:  | 5 2 4 0 5 0 5 0 | 7279.1347  | 0.0244  | 0.010 |
| 6:  | 3 2 2 0 3 0 3 0 | 7186.1321  | -0.0176 | 0.010 |
| 14: | 3 2 2 0 3 0 3 0 | 7186.1321  | -0.0176 | 0.010 |

---

/ SPFIT output reformatted with PIFORM

Silicon 30 11dfscp3ene

---

|  | obs | o-c | error | blends | Notes |
|--|-----|-----|-------|--------|-------|
|  |     | o-c | wt    |        |       |

/ instead of : below denotes (o-c)>3\*err

---

|     |                 |            |         |       |
|-----|-----------------|------------|---------|-------|
| 1:  | 2 1 2 0 1 1 1 0 | 6903.7342  | -0.0125 | 0.010 |
| 2:  | 2 0 2 0 1 0 1 0 | 6991.7507  | -0.0024 | 0.010 |
| 3:  | 2 1 1 0 1 1 0 0 | 7086.6956  | -0.0079 | 0.010 |
| 4:  | 3 1 3 0 2 1 2 0 | 10353.4645 | 0.0031  | 0.010 |
| 5:  | 3 0 3 0 2 0 2 0 | 10478.9132 | -0.0005 | 0.010 |
| 6:  | 3 2 2 0 2 2 1 0 | 10492.7269 | 0.0110  | 0.010 |
| 7:  | 3 2 1 0 2 2 0 0 | 10506.6646 | -0.0024 | 0.010 |
| 8:  | 3 1 2 0 2 1 1 0 | 10627.7917 | -0.0212 | 0.010 |
| 9:  | 4 1 4 0 3 1 3 0 | 13800.7090 | 0.0081  | 0.010 |
| 10: | 4 0 4 0 3 0 3 0 | 13955.8093 | -0.0004 | 0.010 |
| 11: | 4 2 3 0 3 2 2 0 | 13987.5399 | 0.0103  | 0.010 |
| 12: | 4 3 2 0 3 3 1 0 | 13996.8145 | 0.0113  | 0.010 |

|     |                 |            |         |       |
|-----|-----------------|------------|---------|-------|
| 13: | 4 3 1 0 3 3 0 0 | 13997.3130 | 0.0101  | 0.010 |
| 14: | 4 2 2 0 3 2 1 0 | 14022.1986 | 0.0098  | 0.010 |
| 15: | 4 1 3 0 3 1 2 0 | 14166.1041 | -0.0092 | 0.010 |
| 16: | 5 1 5 0 4 1 4 0 | 17244.8050 | -0.0215 | 0.010 |
| 17: | 5 0 5 0 4 0 4 0 | 17419.6070 | -0.0157 | 0.010 |
| 18: | 5 0 5 1 4 0 4 1 | 17419.6936 | 0.0128  | 0.010 |
| 19: | 5 2 4 0 4 2 3 0 | 17479.9890 | 0.0095  | 0.010 |
| 20/ | 5 2 4 1 4 2 3 1 | 17480.0751 | 0.0381  | 0.010 |
| 21: | 5 4 1 0 4 4 1 0 | 17494.9301 | 0.0023  | 0.010 |
| 22: | 5 3 3 0 4 3 2 0 | 17498.6608 | -0.0277 | 0.010 |
| 23: | 5 3 2 0 4 3 1 0 | 17500.4135 | -0.0207 | 0.010 |
| 24/ | 5 2 3 0 4 2 2 0 | 17548.3730 | -0.0358 | 0.010 |
| 25/ | 5 2 3 1 4 2 2 1 | 17548.4450 | 0.0366  | 0.010 |
| 26/ | 5 1 4 0 4 1 3 0 | 17700.4308 | -0.0378 | 0.010 |
| 27/ | 5 1 4 1 4 1 3 1 | 17700.5151 | 0.0429  | 0.010 |

-----

PARAMETERS IN FIT (values truncated and Nlines statistics):

|        |          |               |   |
|--------|----------|---------------|---|
| 10099  | A /MHz   | 3544.41(16)   | 1 |
| 20099  | B /MHz   | 1794.5529(11) | 2 |
| 30099  | C /MHz   | 1703.0745(10) | 3 |
| 299    | DJ /kHz  | 0.244(16)     | 4 |
| 1199   | DJK /kHz | 5.417(68)     | 5 |
| 210001 | Fbc /MHz | 0.49(14)      | 6 |
| 11     | E1 /MHz  | 8391.(624)    | 7 |

MICROWAVE AVG = -0.000358 MHz, IR AVG = 0.00000

MICROWAVE RMS = 0.020135 MHz, IR RMS = 0.00000  
 END OF ITERATION 1 OLD, NEW RMS ERROR= 2.01347 2.01347

distinct frequency lines in fit: 27  
 distinct parameters of fit: 7

| MICROWAVE range | lines fitted | lines | lines   | RMS     | RMS ERROR | J range  | Ka range | freq.               |
|-----------------|--------------|-------|---------|---------|-----------|----------|----------|---------------------|
|                 | total        | dv=0  | dv.ne.0 | UNFITTD | e>900     |          |          |                     |
| v"= 0           | 23           | 23    | 0       | 0       | 0         | 0.016290 | 1.62898  | 1 5 0 4 6904 17700  |
| v"= 1           | 4            | 4     | 0       | 0       | 0         | 0.034624 | 3.46245  | 4 5 0 2 17420 17701 |
| -----           |              |       |         |         |           |          |          |                     |
| total:          | 27           | 27    | 0       | 0       | 0         | 0.020091 | 2.00912  |                     |

NOTE: the RMS values above are for Nlines statistics, but the 'total' values may differ slightly from those in the .FIT file since the o-c values for this evaluation are as rounded in the .FIT.

PARAMETERS IN FIT WITH STANDARD ERRORS ON THOSE THAT ARE FITTED:

(values rounded and degrees of freedom, Ndegf=Nlines-Nconst, statistics)

|        |          |               |   |
|--------|----------|---------------|---|
| 10099  | A /MHz   | 3544.41(37)   | 1 |
| 20099  | B /MHz   | 1794.5529(25) | 2 |
| 30099  | C /MHz   | 1703.0745(25) | 3 |
| 299    | DJ /kHz  | 0.245(39)     | 4 |
| 1199   | DJK /kHz | 5.42(15)      | 5 |
| 210001 | Fbc /MHz | 0.50(32)      | 6 |
| 11     | E1 /MHz  | 8391.(1459)   | 7 |

-----  
Worst fitted constants, with greater than 20% uncertainty: %

210001 Fbc /MHz 0.50(32) 6 65.5  
-----

CORRELATION COEFFICIENTS, C.ij:

|      | A       | B       | C       | -DJ     | -DJK    | Fbc    | E1     |
|------|---------|---------|---------|---------|---------|--------|--------|
| A    | 1.0000  |         |         |         |         |        |        |
| B    | 0.2455  | 1.0000  |         |         |         |        |        |
| C    | -0.3277 | -0.1203 | 1.0000  |         |         |        |        |
| -DJ  | -0.1266 | -0.6108 | -0.5330 | 1.0000  |         |        |        |
| -DJK | 0.3571  | -0.1005 | -0.1342 | -0.2341 | 1.0000  |        |        |
| Fbc  | 0.0363  | 0.1487  | 0.0256  | 0.0616  | -0.4057 | 1.0000 |        |
| E1   | 0.0821  | 0.1323  | 0.0155  | 0.0739  | -0.4053 | 0.9757 | 1.0000 |

Mean value of |C.ij|, i.ne.j = 0.2454

Mean value of C.ij, i.ne.j = -0.0402

No correlations with absolute value greater than 0.9950

Worst fitted lines (obs-calc/error):

27: 4.3      20: 3.8      26: -3.8      25: 3.7  
24: -3.6      22: -2.8      16: -2.1      8: -2.1

23: -2.1    17: -1.6    18: 1.3    1: -1.2  
 12: 1.1    6: 1.1    11: 1.0    13: 1.0  
 14: 1.0    19: 0.9    15: -0.9    9: 0.8  
 3: -0.8    4: 0.3    7: -0.2    2: -0.2  
 21: 0.2    5: -0.1    10: 0.0

27/ 5 1 4 1 4 1 3 1    17700.5151 0.0429 0.010  
 20/ 5 2 4 1 4 2 3 1    17480.0751 0.0381 0.010  
 26/ 5 1 4 0 4 1 3 0    17700.4308 -0.0378 0.010  
 25/ 5 2 3 1 4 2 2 1    17548.4450 0.0366 0.010  
 24/ 5 2 3 0 4 2 2 0    17548.3730 -0.0358 0.010  
 22: 5 3 3 0 4 3 2 0    17498.6608 -0.0277 0.010  
 16: 5 1 5 0 4 1 4 0    17244.8050 -0.0215 0.010  
 8: 3 1 2 0 2 1 1 0    10627.7917 -0.0212 0.010  
 23: 5 3 2 0 4 3 1 0    17500.4135 -0.0207 0.010  
 17: 5 0 5 0 4 0 4 0    17419.6070 -0.0157 0.010

---

/ SPFIT output reformatted with PIFORM

11dfscp3ene Silicon 29

---

| obs | o-c | error | blends | Notes |
|-----|-----|-------|--------|-------|
|     | o-c | wt    |        |       |

/ instead of : below denotes (o-c)>3\*err

---

|                    |           |         |       |  |
|--------------------|-----------|---------|-------|--|
| 1: 2 1 2 0 1 1 1 0 | 6910.3172 | -0.0100 | 0.010 |  |
| 2: 2 0 2 0 1 0 1 0 | 6998.4765 | -0.0080 | 0.010 |  |

|     |         |         |            |         |       |        |      |
|-----|---------|---------|------------|---------|-------|--------|------|
| 3:  | 2 1 1 0 | 1 1 0 0 | 7093.6164  | -0.0028 | 0.010 |        |      |
| 4/  | 3 1 3 0 | 2 1 2 0 | 10363.2869 | -0.0349 | 0.010 |        |      |
| 5:  | 3 0 3 0 | 2 0 2 0 | 10488.9676 | 0.0007  | 0.010 |        |      |
| 6:  | 3 2 2 0 | 2 2 1 0 | 10502.8531 | 0.0172  | 0.010 |        |      |
| 7:  | 3 2 1 1 | 2 2 0 1 | 10516.8477 | -0.0093 | 0.010 |        |      |
| 8:  | 3 1 2 0 | 2 1 1 0 | 10638.1811 | 0.0055  | 0.010 |        |      |
| 9:  | 4 1 4 0 | 3 1 3 0 | 13813.8359 | 0.0060  | 0.010 |        |      |
| 10: | 4 0 4 0 | 3 0 3 0 | 13969.1522 | 0.0183  | 0.010 |        |      |
| 11: | 4 2 3 0 | 3 2 2 0 | 14001.0318 | 0.0185  | 0.010 |        |      |
| 12: | 4 3 2 0 | 3 3 1 0 | 14010.3395 | 0.0073  | 0.010 |        |      |
| 13: | 4 3 1 0 | 3 3 0 0 | 14010.8423 | 0.0118  | 0.010 |        |      |
| 14: | 4 2 2 0 | 3 2 1 0 | 14035.8366 | -0.0078 | 0.010 |        |      |
| 15: | 4 1 3 0 | 3 1 2 0 | 14179.9058 | -0.0023 | 0.010 |        |      |
| 16: | 5 1 5 0 | 4 1 4 0 | 17261.2242 | 0.0137  | 0.010 |        |      |
| 17: | 5 0 5 0 | 4 0 4 0 | 17436.1286 | -0.0288 | 0.010 |        |      |
| 18: | 5 0 5 1 | 4 0 4 1 | 17436.2094 | 0.0006  | 0.010 |        |      |
| 19/ | 5 2 4 1 | 4 2 3 1 | 17496.9020 | 0.0328  | 0.010 |        |      |
| 20/ | 5 4 2 1 | 4 4 1 1 | 17511.7384 | -0.0484 | 0.010 |        |      |
| 21/ | 5 4 1 0 | 4 4 0 0 | 17511.8382 | 0.0339  | 0.010 | 0.0406 | 0.50 |
| 22: | 5 4 2 0 | 4 4 1 0 | 17511.8382 | 0.0472  | 0.010 | 0.0406 | 0.50 |
| 23: | 5 3 3 0 | 4 3 2 0 | 17515.6155 | -0.0182 | 0.010 |        |      |
| 24/ | 5 3 2 1 | 4 3 1 1 | 17517.3184 | -0.0384 | 0.010 |        |      |
| 25/ | 5 3 2 0 | 4 3 1 0 | 17517.4132 | 0.0395  | 0.010 |        |      |
| 26/ | 5 2 3 0 | 4 2 2 0 | 17565.5338 | -0.0474 | 0.010 |        |      |
| 27/ | 5 2 3 1 | 4 2 2 1 | 17565.6178 | 0.0399  | 0.010 |        |      |
| 28: | 5 1 4 0 | 4 1 3 0 | 17717.6676 | -0.0067 | 0.010 |        |      |

-----

PARAMETERS IN FIT (values truncated and Nlines statistics):



|        |          |               |   |
|--------|----------|---------------|---|
| 10099  | A /MHz   | 3543.44(16)   | 1 |
| 20099  | B /MHz   | 1796.3239(12) | 2 |
| 30099  | C /MHz   | 1704.6779(12) | 3 |
| 299    | DJ /kHz  | 0.223(20)     | 4 |
| 1199   | DJK /kHz | 5.728(58)     | 5 |
| 210001 | Fbc /MHz | 0.863(68)     | 6 |
| 11     | E1 /MHz  | 11476.(475)   | 7 |

MICROWAVE AVG = -0.000387 MHz, IR AVG = 0.00000  
MICROWAVE RMS = 0.024462 MHz, IR RMS = 0.00000  
END OF ITERATION 1 OLD, NEW RMS ERROR= 2.44624 2.44624

distinct frequency lines in fit: 27  
distinct parameters of fit: 7

| MICROWAVE | lines fitted | lines | lines   | RMS     | RMS ERROR | J range  | Ka range | freq.               |
|-----------|--------------|-------|---------|---------|-----------|----------|----------|---------------------|
| range     |              |       |         |         |           |          |          |                     |
|           | total        | dv=0  | dv.ne.0 | UNFITTD | e>900     |          |          |                     |
| v"= 0     | 21           | 21    | 0       | 0       | 0         | 0.021309 | 2.13087  | 1 5 0 4 6910 17718  |
| v"= 1     | 6            | 6     | 0       | 0       | 0         | 0.033095 | 3.30954  | 2 5 0 4 10517 17566 |
| -----     |              |       |         |         |           |          |          |                     |
| total:    | 27           | 27    | 0       | 0       | 0         | 0.024425 | 2.44245  |                     |

NOTE: the RMS values above are for Nlines statistics, but the 'total' values may differ slightly from those in the .FIT file since the o-c values for this evaluation are as rounded in the .FIT.

PARAMETERS IN FIT WITH STANDARD ERRORS ON THOSE THAT ARE FITTED:

(values rounded and degrees of freedom, Ndegf=Nlines-Nconst, statistics)

|        |          |               |   |
|--------|----------|---------------|---|
| 10099  | A /MHz   | 3543.45(47)   | 1 |
| 20099  | B /MHz   | 1796.3240(36) | 2 |
| 30099  | C /MHz   | 1704.6780(36) | 3 |
| 299    | DJ /kHz  | 0.223(58)     | 4 |
| 1199   | DJK /kHz | 5.73(16)      | 5 |
| 210001 | Fbc /MHz | 0.86(19)      | 6 |
| 11     | E1 /MHz  | 11476.(1350)  | 7 |

-----  
Worst fitted constants, with greater than 20% uncertainty: %

|        |          |           |   |      |
|--------|----------|-----------|---|------|
| 299    | DJ /kHz  | 0.223(58) | 4 | 26.1 |
| 210001 | Fbc /MHz | 0.86(19)  | 6 | 22.4 |

-----

CORRELATION COEFFICIENTS, C.ij:

|      | A       | B       | C       | -DJ     | -DJK    | Fbc     | E1     |
|------|---------|---------|---------|---------|---------|---------|--------|
| A    | 1.0000  |         |         |         |         |         |        |
| B    | 0.2727  | 1.0000  |         |         |         |         |        |
| C    | -0.3813 | -0.1257 | 1.0000  |         |         |         |        |
| -DJ  | -0.0516 | -0.6035 | -0.5985 | 1.0000  |         |         |        |
| -DJK | 0.3591  | -0.0279 | -0.0131 | -0.2852 | 1.0000  |         |        |
| Fbc  | -0.2197 | 0.1838  | 0.1218  | -0.1778 | -0.2508 | 1.0000  |        |
| E1   | 0.1701  | -0.1232 | -0.0865 | 0.1506  | -0.2006 | -0.1997 | 1.0000 |

Mean value of |C.ij|, i.ne.j = 0.2192

Mean value of C.ij, i.ne.j = -0.0994

No correlations with absolute value greater than 0.9950

Worst fitted lines (obs-calc/error):

|     |      |     |      |     |      |     |      |
|-----|------|-----|------|-----|------|-----|------|
| 20: | -4.8 | 26: | -4.7 | 21: | 4.1  | 27: | 4.0  |
| 25: | 4.0  | 24: | -3.8 | 4:  | -3.5 | 19: | 3.3  |
| 17: | -2.9 | 11: | 1.8  | 10: | 1.8  | 23: | -1.8 |
| 6:  | 1.7  | 16: | 1.4  | 13: | 1.2  | 1:  | -1.0 |
| 7:  | -0.9 | 2:  | -0.8 | 14: | -0.8 | 12: | 0.7  |
| 28: | -0.7 | 9:  | 0.6  | 8:  | 0.5  | 3:  | -0.3 |
| 15: | -0.2 | 5:  | 0.1  | 18: | 0.1  | 22: | 0.0  |

|     |   |   |   |   |   |   |   |   |            |         |       |        |      |
|-----|---|---|---|---|---|---|---|---|------------|---------|-------|--------|------|
| 20/ | 5 | 4 | 2 | 1 | 4 | 4 | 1 | 1 | 17511.7384 | -0.0484 | 0.010 |        |      |
| 26/ | 5 | 2 | 3 | 0 | 4 | 2 | 2 | 0 | 17565.5338 | -0.0474 | 0.010 |        |      |
| 21/ | 5 | 4 | 1 | 0 | 4 | 4 | 0 | 0 | 17511.8382 | 0.0339  | 0.010 | 0.0406 | 0.50 |
| 27/ | 5 | 2 | 3 | 1 | 4 | 2 | 2 | 1 | 17565.6178 | 0.0399  | 0.010 |        |      |
| 25/ | 5 | 3 | 2 | 0 | 4 | 3 | 1 | 0 | 17517.4132 | 0.0395  | 0.010 |        |      |
| 24/ | 5 | 3 | 2 | 1 | 4 | 3 | 1 | 1 | 17517.3184 | -0.0384 | 0.010 |        |      |
| 4/  | 3 | 1 | 3 | 0 | 2 | 1 | 2 | 0 | 10363.2869 | -0.0349 | 0.010 |        |      |
| 19/ | 5 | 2 | 4 | 1 | 4 | 2 | 3 | 1 | 17496.9020 | 0.0328  | 0.010 |        |      |
| 17: | 5 | 0 | 5 | 0 | 4 | 0 | 4 | 0 | 17436.1286 | -0.0288 | 0.010 |        |      |
| 11: | 4 | 2 | 3 | 0 | 3 | 2 | 2 | 0 | 14001.0318 | 0.0185  | 0.010 |        |      |

11dfscp3ene 3&4 Carbon-13

---

|                                          | obs   | o-c   | error      | blends  | Notes |
|------------------------------------------|-------|-------|------------|---------|-------|
|                                          |       |       | o-c        | wt      |       |
| / instead of : below denotes (o-c)>3*err |       |       |            |         |       |
| 1:                                       | 2 1 2 | 1 1 1 | 6872.6291  | -0.0069 | 0.010 |
| 2:                                       | 2 0 2 | 1 0 1 | 6970.9813  | -0.0081 | 0.010 |
| 3:                                       | 2 1 1 | 1 1 0 | 7078.3533  | -0.0062 | 0.010 |
| 4:                                       | 3 1 3 | 2 1 2 | 10306.1667 | -0.0005 | 0.010 |
| 5:                                       | 3 0 3 | 2 0 2 | 10445.2035 | 0.0011  | 0.010 |
| 6:                                       | 3 2 2 | 2 2 1 | 10463.1129 | -0.0225 | 0.010 |
| 7:                                       | 3 2 1 | 2 2 0 | 10481.1953 | -0.0010 | 0.010 |
| 8:                                       | 3 1 2 | 2 1 1 | 10614.6259 | -0.0018 | 0.010 |
| 9:                                       | 4 1 4 | 3 1 3 | 13736.5388 | 0.0130  | 0.010 |
| 10/                                      | 4 0 4 | 3 0 3 | 13906.2416 | 0.0316  | 0.010 |
| 11:                                      | 4 2 3 | 3 2 2 | 13947.2820 | -0.0114 | 0.010 |
| 12:                                      | 4 3 2 | 3 3 1 | 13959.3061 | 0.0039  | 0.010 |
| 13:                                      | 4 3 1 | 3 3 0 | 13960.0713 | 0.0210  | 0.010 |
| 14:                                      | 4 2 2 | 3 2 1 | 13992.0602 | -0.0090 | 0.010 |
| 15:                                      | 4 1 3 | 3 1 2 | 14147.2335 | 0.0086  | 0.010 |
| 16:                                      | 5 1 5 | 4 1 4 | 17162.9131 | -0.0180 | 0.010 |
| 17:                                      | 5 0 5 | 4 0 4 | 17350.6456 | 0.0150  | 0.010 |
| 18/                                      | 5 2 4 | 4 2 3 | 17428.3805 | -0.0308 | 0.010 |
| 19:                                      | 5 3 3 | 4 3 2 | 17452.5122 | 0.0019  | 0.010 |
| 20:                                      | 5 3 2 | 4 3 1 | 17455.1171 | -0.0044 | 0.010 |
| 21:                                      | 5 2 3 | 4 2 2 | 17516.4748 | 0.0275  | 0.010 |
| 22:                                      | 5 1 4 | 4 1 3 | 17674.6145 | -0.0141 | 0.010 |

---

PARAMETERS IN FIT (values truncated and Nlines statistics):

|       |          |               |   |
|-------|----------|---------------|---|
| 10000 | A /MHz   | 3494.65(16)   | 1 |
| 20000 | B /MHz   | 1795.3127(12) | 2 |
| 30000 | C /MHz   | 1692.4509(12) | 3 |
| 200   | DJ /kHz  | 0.258(21)     | 4 |
| 1100  | DJK /kHz | 5.32(10)      | 5 |

MICROWAVE AVG = -0.000504 MHz, IR AVG = 0.00000  
 MICROWAVE RMS = 0.015180 MHz, IR RMS = 0.00000  
 END OF ITERATION 1 OLD, NEW RMS ERROR= 1.51802 1.51802

distinct frequency lines in fit: 22

distinct parameters of fit: 5

|                             | upper state | lower state | overall |
|-----------------------------|-------------|-------------|---------|
| limits of quantum number 1: | 2 5         | 1 4         | 1 5     |
| limits of quantum number 2: | 0 3         | 0 3         | 0 3     |
| limits of quantum number 3: | 1 5         | 0 4         | 0 5     |

frequency range: 6872 17674

PARAMETERS IN FIT WITH STANDARD ERRORS ON THOSE THAT ARE FITTED:

(values rounded and degrees of freedom, Ndegf=Nlines-Nconst, statistics)

|       |         |               |   |
|-------|---------|---------------|---|
| 10000 | A /MHz  | 3494.65(29)   | 1 |
| 20000 | B /MHz  | 1795.3127(22) | 2 |
| 30000 | C /MHz  | 1692.4510(22) | 3 |
| 200   | DJ /kHz | 0.258(37)     | 4 |

## CORRELATION COEFFICIENTS, C.ij:

|      | A       | B       | C       | -DJ     | -DJK   |
|------|---------|---------|---------|---------|--------|
| A    | 1.0000  |         |         |         |        |
| B    | 0.2196  | 1.0000  |         |         |        |
| C    | -0.3381 | -0.1109 | 1.0000  |         |        |
| -DJ  | -0.1561 | -0.5635 | -0.5699 | 1.0000  |        |
| -DJK | 0.5035  | -0.1318 | -0.1142 | -0.2625 | 1.0000 |

Mean value of |C.ij|, i.ne.j = 0.2970

Mean value of C.ij, i.ne.j = -0.1524

No correlations with absolute value greater than 0.9950

## Worst fitted lines (obs-calc/error):

|         |          |          |          |
|---------|----------|----------|----------|
| 10: 3.2 | 18: -3.1 | 21: 2.8  | 6: -2.2  |
| 13: 2.1 | 16: -1.8 | 17: 1.5  | 22: -1.4 |
| 9: 1.3  | 11: -1.1 | 14: -0.9 | 15: 0.9  |
| 2: -0.8 | 1: -0.7  | 3: -0.6  | 20: -0.4 |
| 12: 0.4 | 19: 0.2  | 8: -0.2  | 5: 0.1   |
| 7: -0.1 | 4: -0.1  |          |          |

10/ 4 0 4 3 0 3 13906.2416 0.0316 0.010

18/ 5 2 4 4 2 3 17428.3805 -0.0308 0.010

|                 |                          |
|-----------------|--------------------------|
| 21: 5 2 3 4 2 2 | 17516.4748 0.0275 0.010  |
| 6: 3 2 2 2 2 1  | 10463.1129 -0.0225 0.010 |
| 13: 4 3 1 3 3 0 | 13960.0713 0.0210 0.010  |
| 16: 5 1 5 4 1 4 | 17162.9131 -0.0180 0.010 |
| 17: 5 0 5 4 0 4 | 17350.6456 0.0150 0.010  |
| 22: 5 1 4 4 1 3 | 17674.6145 -0.0141 0.010 |
| 9: 4 1 4 3 1 3  | 13736.5388 0.0130 0.010  |
| 11: 4 2 3 3 2 2 | 13947.2820 -0.0114 0.010 |

---

/ SPFIT output reformatted with PIFORM

11dfscp3ene 1&2 Carbon-13

---

|                                          | obs   | o-c   | error      | blends  | Notes |
|------------------------------------------|-------|-------|------------|---------|-------|
|                                          |       | o-c   | wt         |         |       |
| / instead of : below denotes (o-c)>3*err |       |       |            |         |       |
| 1:                                       | 2 1 2 | 1 1 1 | 6817.4411  | -0.0080 | 0.010 |
| 2:                                       | 2 0 2 | 1 0 1 | 6905.7642  | -0.0020 | 0.010 |
| 3:                                       | 2 1 1 | 1 1 0 | 7001.0493  | 0.0115  | 0.010 |
| 4:                                       | 3 1 3 | 2 1 2 | 10224.0152 | -0.0017 | 0.010 |
| 5:                                       | 3 0 3 | 2 0 2 | 10349.9358 | 0.0078  | 0.010 |
| 6:                                       | 3 2 2 | 2 2 1 | 10363.7596 | -0.0032 | 0.010 |
| 7:                                       | 3 2 1 | 2 2 0 | 10377.7232 | 0.0034  | 0.010 |
| 8:                                       | 4 1 4 | 3 1 3 | 13628.0931 | -0.0184 | 0.010 |
| 9:                                       | 4 0 4 | 3 0 3 | 13783.8285 | 0.0108  | 0.010 |
| 10:                                      | 4 2 3 | 3 2 2 | 13815.5901 | -0.0186 | 0.010 |
| 11:                                      | 4 3 2 | 3 3 1 | 13824.8574 | -0.0214 | 0.010 |
| 12:                                      | 4 3 1 | 3 3 0 | 13825.3949 | 0.0163  | 0.010 |
| 13:                                      | 4 2 2 | 3 2 1 | 13850.2917 | 0.0095  | 0.010 |
| 14:                                      | 4 1 3 | 3 1 2 | 13994.8006 | 0.0115  | 0.010 |
| 15:                                      | 5 1 5 | 4 1 4 | 17029.1166 | 0.0217  | 0.010 |
| 16:                                      | 5 0 5 | 4 0 4 | 17204.6058 | -0.0070 | 0.010 |
| 17:                                      | 5 2 4 | 4 2 3 | 17265.0912 | -0.0168 | 0.010 |
| 18:                                      | 5 4 1 | 4 4 0 | 17280.0412 | -0.0142 | 0.010 |
| 19:                                      | 5 3 3 | 4 3 2 | 17283.8167 | 0.0203  | 0.010 |
| 20:                                      | 5 3 2 | 4 3 1 | 17285.5681 | 0.0258  | 0.010 |
| 21:                                      | 5 2 3 | 4 2 2 | 17333.5501 | -0.0152 | 0.010 |
| 22:                                      | 5 1 4 | 4 1 3 | 17486.3099 | -0.0108 | 0.010 |

---



PARAMETERS IN FIT (values truncated and Nlines statistics):

|       |          |               |   |
|-------|----------|---------------|---|
| 10000 | A /MHz   | 3533.34(20)   | 1 |
| 20000 | B /MHz   | 1773.2145(14) | 2 |
| 30000 | C /MHz   | 1681.4202(12) | 3 |
| 200   | DJ /kHz  | 0.181(22)     | 4 |
| 1100  | DJK /kHz | 5.082(69)     | 5 |

MICROWAVE AVG = 0.000063 MHz, IR AVG = 0.00000

MICROWAVE RMS = 0.014271 MHz, IR RMS = 0.00000

END OF ITERATION 1 OLD, NEW RMS ERROR= 1.42713 1.42713

distinct frequency lines in fit: 22

distinct parameters of fit: 5

|                             | upper state | lower state | overall |
|-----------------------------|-------------|-------------|---------|
| limits of quantum number 1: | 2 5         | 1 4         | 1 5     |
| limits of quantum number 2: | 0 4         | 0 4         | 0 4     |
| limits of quantum number 3: | 1 5         | 0 4         | 0 5     |

frequency range: 6817 17486

PARAMETERS IN FIT WITH STANDARD ERRORS ON THOSE THAT ARE FITTED:

(values rounded and degrees of freedom, Ndegf=Nlines-Nconst, statistics)

|       |        |               |   |
|-------|--------|---------------|---|
| 10000 | A /MHz | 3533.34(33)   | 1 |
| 20000 | B /MHz | 1773.2146(22) | 2 |
| 30000 | C /MHz | 1681.4202(20) | 3 |

|      |          |           |   |
|------|----------|-----------|---|
| 200  | DJ /kHz  | 0.181(36) | 4 |
| 1100 | DJK /kHz | 5.08(11)  | 5 |

CORRELATION COEFFICIENTS, C.ij:

|      | A       | B       | C       | -DJ     | -DJK   |
|------|---------|---------|---------|---------|--------|
| A    | 1.0000  |         |         |         |        |
| B    | 0.2714  | 1.0000  |         |         |        |
| C    | -0.2826 | -0.1350 | 1.0000  |         |        |
| -DJ  | -0.1734 | -0.6098 | -0.5574 | 1.0000  |        |
| -DJK | 0.4238  | -0.0484 | -0.0161 | -0.3158 | 1.0000 |

Mean value of |C.ij|, i.ne.j = 0.2834

Mean value of C.ij, i.ne.j = -0.1443

No correlations with absolute value greater than 0.9950

Worst fitted lines (obs-calc/error):

|          |          |          |         |
|----------|----------|----------|---------|
| 20: 2.6  | 15: 2.2  | 11: -2.1 | 19: 2.0 |
| 10: -1.9 | 8: -1.8  | 17: -1.7 | 12: 1.6 |
| 21: -1.5 | 18: -1.4 | 14: 1.1  | 3: 1.1  |
| 22: -1.1 | 9: 1.1   | 13: 0.9  | 1: -0.8 |
| 5: 0.8   | 16: -0.7 | 7: 0.3   | 6: -0.3 |
| 2: -0.2  | 4: -0.2  |          |         |

20: 5 3 2 4 3 1                      17285.5681 0.0258 0.010

|                 |            |         |       |
|-----------------|------------|---------|-------|
| 15: 5 1 5 4 1 4 | 17029.1166 | 0.0217  | 0.010 |
| 11: 4 3 2 3 3 1 | 13824.8574 | -0.0214 | 0.010 |
| 19: 5 3 3 4 3 2 | 17283.8167 | 0.0203  | 0.010 |
| 10: 4 2 3 3 2 2 | 13815.5901 | -0.0186 | 0.010 |
| 8: 4 1 4 3 1 3  | 13628.0931 | -0.0184 | 0.010 |
| 17: 5 2 4 4 2 3 | 17265.0912 | -0.0168 | 0.010 |
| 12: 4 3 1 3 3 0 | 13825.3949 | 0.0163  | 0.010 |
| 21: 5 2 3 4 2 2 | 17333.5501 | -0.0152 | 0.010 |
| 18: 5 4 1 4 4 0 | 17280.0412 | -0.0142 | 0.010 |

---

/ SPFIT output reformatted with PIFORM

3SiCP Parent

```
-----=====
                obs      o-c  error  blends  Notes
                    o-c   wt
/ instead of : below denotes (o-c)>3*err
-----=====
```

|     |                   |            |         |       |              |
|-----|-------------------|------------|---------|-------|--------------|
| 1:  | 1 0 1 0 0 0 0 0   | 7286.7327  | -0.0038 | 0.010 |              |
| 2:  | 7 4 3 0 7 4 4 0   | 8010.9727  | 0.0095  | 0.010 |              |
| 3:  | 4 2 2 0 4 2 3 0   | 8294.1383  | 0.0047  | 0.010 |              |
| 4:  | 2 2 1 0 2 0 2 0   | 10164.4008 | 0.0147  | 0.010 |              |
| 5/  | 3 1 2 0 3 1 3 0   | 10370.5351 | -0.0781 | 0.010 |              |
| 6:  | 3 1 2 1 3 1 3 1   | 10370.6312 | 0.0090  | 0.010 |              |
| 7:  | 6 3 3 1 6 3 4 1   | 11284.8654 | -0.0026 | 0.010 |              |
| 8:  | 6 3 3 0 6 3 4 0   | 11285.1515 | 0.0250  | 0.010 |              |
| 9:  | 2 1 2 0 1 1 1 0   | 12783.6925 | 0.0086  | 0.010 |              |
| 10: | 3 2 2 0 3 0 3 0   | 12933.9109 | 0.0049  | 0.010 |              |
| 11: | 11 6 5 1 11 6 6 1 | 12958.0310 | 0.0000  | 0.010 |              |
| 12: | 11 6 5 0 11 6 6 0 | 12960.3195 | 0.0038  | 0.010 |              |
| 13: | 2 0 2 0 1 0 1 0   | 13627.9828 | -0.0257 | 0.010 |              |
| 14: | 2 0 2 1 1 0 1 1   | 13628.0354 | 0.0206  | 0.010 |              |
| 15: | 5 2 3 0 5 2 4 0   | 14043.8868 | 0.0272  | 0.010 |              |
| 16: | 8 4 4 1 8 4 5 1   | 14370.0898 | 0.0013  | 0.010 |              |
| 17/ | 8 4 4 0 8 4 5 0   | 14370.7425 | -0.0334 | 0.010 |              |
| 18: | 3 3 1 0 3 1 2 0   | 14425.1058 | -0.0089 | 0.010 |              |
| 19: | 4 3 2 0 4 1 3 0   | 15018.8384 | 0.0035  | 0.010 |              |
| 20: | 4 1 3 0 4 1 4 0   | 15832.9268 | 0.0204  | 0.010 |              |
| 21/ | 2 1 1 0 1 1 0 0   | 16363.1866 | -0.0370 | 0.010 |              |
| 22/ | 2 1 1 1 1 1 0 1   | 16363.2638 | 0.0356  | 0.010 |              |
| 23: | 4 2 3 0 4 0 4 0   | 16842.6227 | 0.0050  | 0.010 | -0.0177 0.50 |

24: 4 2 3 1 4 0 4 1 16842.6227 -0.0404 0.010 -0.0177 0.50  
 25: 5 3 3 0 5 1 4 0 17475.7920 0.0097 0.010  
 26: 7 3 4 0 7 3 5 0 17703.8579 0.0031 0.010  
 27: 5 1 4 0 4 3 1 0 17981.2284 -0.0001 0.010

-----  
 PARAMETERS IN FIT (values truncated and Nlines statistics):

|        |            |               |   |
|--------|------------|---------------|---|
| 10099  | A / /MHz   | 5948.1093(16) | 1 |
| 20099  | B / /MHz   | 4538.2601(14) | 2 |
| 30099  | C / /MHz   | 2748.4792(14) | 3 |
| 299    | DJ / /kHz  | 0.712(39)     | 4 |
| 2099   | DK / /kHz  | 1.182(90)     | 5 |
| 40199  | d1 / /kHz  | -0.340(13)    | 6 |
| 50099  | d2 / /kHz  | -0.1114(77)   | 7 |
| 11     | E1 / /MHz  | 131812.(134)  | 8 |
| 210001 | Fbc / /MHz | 6.060(53)     | 9 |

MICROWAVE AVG = -0.000206 MHz, IR AVG = 0.00000  
 MICROWAVE RMS = 0.023051 MHz, IR RMS = 0.00000  
 END OF ITERATION 1 OLD, NEW RMS ERROR= 2.30512 2.30512

distinct frequency lines in fit: 26

distinct parameters of fit: 9

MICROWAVE lines fitted lines lines RMS RMS ERROR J range Ka range freq.  
 range

total dv=0 dv.ne.0 UNFITTD e>900

|        |    |    |   |   |   |          |         |   |    |   |   |       |       |
|--------|----|----|---|---|---|----------|---------|---|----|---|---|-------|-------|
| v"= 0  | 20 | 20 | 0 | 0 | 0 | 0.024484 | 2.44841 | 0 | 11 | 0 | 6 | 7287  | 17981 |
| v"= 1  | 6  | 6  | 0 | 0 | 0 | 0.017230 | 1.72297 | 1 | 11 | 0 | 6 | 10371 | 16363 |
| -----  |    |    |   |   |   |          |         |   |    |   |   |       |       |
| total: | 26 | 26 | 0 | 0 | 0 | 0.023014 | 2.30139 |   |    |   |   |       |       |

NOTE: the RMS values above are for Nlines statistics, but the 'total' values may differ slightly from those in the .FIT file since the o-c values for this evaluation are as rounded in the .FIT.

PARAMETERS IN FIT WITH STANDARD ERRORS ON THOSE THAT ARE FITTED:

(values rounded and degrees of freedom, Ndegf=Nlines-Nconst, statistics)

|        |            |               |   |
|--------|------------|---------------|---|
| 10099  | A / /MHz   | 5948.1093(47) | 1 |
| 20099  | B / /MHz   | 4538.2601(39) | 2 |
| 30099  | C / /MHz   | 2748.4793(41) | 3 |
| 299    | DJ / /kHz  | 0.71(11)      | 4 |
| 2099   | DK / /kHz  | 1.18(25)      | 5 |
| 40199  | d1 / /kHz  | -0.340(38)    | 6 |
| 50099  | d2 / /kHz  | -0.111(21)    | 7 |
| 11     | E1 / /MHz  | 131812.(381)  | 8 |
| 210001 | Fbc / /MHz | 6.06(15)      | 9 |

-----  
Worst fitted constants, with greater than 20% uncertainty: %

|      |           |          |   |      |
|------|-----------|----------|---|------|
| 2099 | DK / /kHz | 1.18(25) | 5 | 21.7 |
|------|-----------|----------|---|------|

-----

CORRELATION COEFFICIENTS, C.ij:

|       | A /     | B /     | C /     | -DJ /   | -DK /  | d1 /    | d2 /   | E1 /   |  |
|-------|---------|---------|---------|---------|--------|---------|--------|--------|--|
| A /   | 1.0000  |         |         |         |        |         |        |        |  |
| B /   | 0.8145  | 1.0000  |         |         |        |         |        |        |  |
| C /   | 0.5750  | 0.6865  | 1.0000  |         |        |         |        |        |  |
| -DJ / | -0.4719 | -0.5909 | -0.8317 | 1.0000  |        |         |        |        |  |
| -DK / | -0.4090 | -0.1983 | 0.1696  | 0.0120  | 1.0000 |         |        |        |  |
| d1 /  | -0.1765 | -0.2867 | 0.3925  | -0.3586 | 0.1613 | 1.0000  |        |        |  |
| d2 /  | 0.1028  | 0.2035  | -0.3216 | 0.3508  | 0.1276 | -0.9395 | 1.0000 |        |  |
| E1 /  | -0.2297 | 0.0075  | -0.0447 | 0.1271  | 0.3824 | -0.0880 | 0.0557 | 1.0000 |  |
| Fbc / | -0.2090 | 0.0017  | -0.0414 | 0.1295  | 0.3358 | -0.0765 | 0.0401 | 0.9420 |  |

Fbc /

Fbc / 1.0000

Mean value of |C.ij|, i.ne.j = 0.3025

Mean value of C.ij, i.ne.j = 0.0095

No correlations with absolute value greater than 0.9950

Worst fitted lines (obs-calc/error):

|         |          |         |          |
|---------|----------|---------|----------|
| 5: -7.8 | 21: -3.7 | 22: 3.6 | 17: -3.3 |
| 15: 2.7 | 13: -2.6 | 8: 2.5  | 14: 2.1  |
| 20: 2.0 | 23: -1.8 | 4: 1.5  | 25: 1.0  |

2: 0.9    6: 0.9    18: -0.9    9: 0.9  
 10: 0.5    3: 0.5    1: -0.4    12: 0.4  
 19: 0.3    26: 0.3    7: -0.3    16: 0.1  
 27: 0.0    24: 0.0    11: 0.0

5/ 3 1 2 0 3 1 3 0    10370.5351 -0.0781 0.010  
 21/ 2 1 1 0 1 1 0 0    16363.1866 -0.0370 0.010  
 22/ 2 1 1 1 1 1 0 1    16363.2638 0.0356 0.010  
 17/ 8 4 4 0 8 4 5 0    14370.7425 -0.0334 0.010  
 15: 5 2 3 0 5 2 4 0    14043.8868 0.0272 0.010  
 13: 2 0 2 0 1 0 1 0    13627.9828 -0.0257 0.010  
 8: 6 3 3 0 6 3 4 0    11285.1515 0.0250 0.010  
 14: 2 0 2 1 1 0 1 1    13628.0354 0.0206 0.010  
 20: 4 1 3 0 4 1 4 0    15832.9268 0.0204 0.010  
 23: 4 2 3 0 4 0 4 0    16842.6227 0.0050 0.010 -0.0177 0.50



3SiCP 29Si

---

|  | obs | o-c | error | blends | Notes |
|--|-----|-----|-------|--------|-------|
|  |     |     | o-c   | wt     |       |

/ instead of : below denotes (o-c)>3\*err

---

|    |             |            |         |       |  |
|----|-------------|------------|---------|-------|--|
| 1: | 1 0 1 0 0 0 | 7226.5573  | -0.0098 | 0.010 |  |
| 2: | 2 1 2 1 1 1 | 12660.6888 | 0.0024  | 0.010 |  |
| 3: | 2 0 2 1 0 1 | 13515.1930 | 0.0000  | 0.010 |  |
| 4: | 2 1 1 1 1 0 | 16245.5505 | 0.0024  | 0.010 |  |

---

PARAMETERS IN FIT (values truncated and Nlines statistics):

|       |           |                |   |
|-------|-----------|----------------|---|
| 10000 | A / /MHz  | 5947.901(40)   | 1 |
| 20000 | B / /MHz  | 4509.5060(39)  | 2 |
| 30000 | C / /MHz  | 2717.0640(39)  | 3 |
| 200   | DJ / /kHz | [ 0.707924819] | 4 |
| 2000  | DK / /kHz | [ 1.136789663] | 5 |
| 40100 | d1 / /kHz | [-0.348099707] | 6 |
| 50000 | d2 / /kHz | [-0.105283752] | 7 |

MICROWAVE AVG = -0.001225 MHz, IR AVG = 0.00000  
 MICROWAVE RMS = 0.005198 MHz, IR RMS = 0.00000  
 END OF ITERATION 1 OLD, NEW RMS ERROR= 0.51975 0.51975

distinct frequency lines in fit: 4

distinct parameters of fit: 3

|                             | upper state | lower state | overall |
|-----------------------------|-------------|-------------|---------|
| limits of quantum number 1: | 1 2         | 0 1         | 0 2     |
| limits of quantum number 2: | 0 1         | 0 1         | 0 1     |
| limits of quantum number 3: | 1 2         | 0 1         | 0 2     |

frequency range: 7226 16245

PARAMETERS IN FIT WITH STANDARD ERRORS ON THOSE THAT ARE FITTED:

(values rounded and degrees of freedom, Ndegf=Nlines-Nconst, statistics)

|       |           |                |   |
|-------|-----------|----------------|---|
| 10000 | A / /MHz  | 5947.901(41)   | 1 |
| 20000 | B / /MHz  | 4509.5060(40)  | 2 |
| 30000 | C / /MHz  | 2717.0640(40)  | 3 |
| 200   | DJ / /kHz | [ 0.707924819] | 4 |
| 2000  | DK / /kHz | [ 1.136789663] | 5 |
| 40100 | d1 / /kHz | [-0.348099707] | 6 |
| 50000 | d2 / /kHz | [-0.105283752] | 7 |

CORRELATION COEFFICIENTS, C.ij:

A / B / C /

A / 1.0000

B / 0.2606 1.0000

C / -0.6454 -0.6364 1.0000

Mean value of |C.ij|, i.ne.j = 0.5142

Mean value of C.ij, i.ne.j = -0.3404

No correlations with absolute value greater than 0.9950

Worst fitted lines (obs-calc/error):

|    |             |    |     |    |            |         |       |
|----|-------------|----|-----|----|------------|---------|-------|
| 1: | -1.0        | 4: | 0.2 | 2: | 0.2        | 3:      | 0.0   |
| 1: | 1 0 1 0 0 0 |    |     |    | 7226.5573  | -0.0098 | 0.010 |
| 4: | 2 1 1 1 1 0 |    |     |    | 16245.5505 | 0.0024  | 0.010 |
| 2: | 2 1 2 1 1 1 |    |     |    | 12660.6888 | 0.0024  | 0.010 |
| 3: | 2 0 2 1 0 1 |    |     |    | 13515.1930 | 0.0000  | 0.010 |

---

/ SPFIT output reformatted with PIFORM

3SiCP 30Si

---

|    | obs         | o-c | error | blends | Notes                    |
|----|-------------|-----|-------|--------|--------------------------|
|    |             |     | o-c   | wt     |                          |
| 1: | 1 0 1 0 0 0 |     |       |        | 7155.0931 0.0206 0.010   |
| 2: | 2 1 2 1 1 1 |     |       |        | 12543.2359 -0.0079 0.010 |
| 3: | 2 0 2 1 0 1 |     |       |        | 13408.4800 -0.0206 0.010 |
| 4: | 3 0 3 2 0 2 |     |       |        | 18783.6626 0.0122 0.010  |

---

PARAMETERS IN FIT (values truncated and Nlines statistics):

|       |           |                |   |
|-------|-----------|----------------|---|
| 10000 | A / /MHz  | 5949.015(41)   | 1 |
| 20000 | B / /MHz  | 4460.985(11)   | 2 |
| 30000 | C / /MHz  | 2694.0901(55)  | 3 |
| 200   | DJ / /kHz | [ 0.707924819] | 4 |
| 2000  | DK / /kHz | [ 1.136789663] | 5 |
| 40100 | d1 / /kHz | [-0.348099707] | 6 |
| 50000 | d2 / /kHz | [-0.105283752] | 7 |

MICROWAVE AVG = 0.001061 MHz, IR AVG = 0.00000  
MICROWAVE RMS = 0.016347 MHz, IR RMS = 0.00000  
END OF ITERATION 1 OLD, NEW RMS ERROR= 1.63472 1.63472

distinct frequency lines in fit: 4

distinct parameters of fit: 3

|                             | upper state | lower state | overall |  |
|-----------------------------|-------------|-------------|---------|--|
| limits of quantum number 1: | 1 3         | 0 2         | 0 3     |  |
| limits of quantum number 2: | 0 1         | 0 1         | 0 1     |  |
| limits of quantum number 3: | 1 3         | 0 2         | 0 3     |  |

frequency range: 7155 18783

PARAMETERS IN FIT WITH STANDARD ERRORS ON THOSE THAT ARE FITTED:

(values rounded and degrees of freedom, Ndegf=Nlines-Nconst, statistics)

|       |           |                |   |
|-------|-----------|----------------|---|
| 10000 | A / /MHz  | 5949.02(13)    | 1 |
| 20000 | B / /MHz  | 4460.985(37)   | 2 |
| 30000 | C / /MHz  | 2694.090(17)   | 3 |
| 200   | DJ / /kHz | [ 0.707924819] | 4 |

|       |           |                |   |
|-------|-----------|----------------|---|
| 2000  | DK / /kHz | [ 1.136789663] | 5 |
| 40100 | d1 / /kHz | [-0.348099707] | 6 |
| 50000 | d2 / /kHz | [-0.105283752] | 7 |

CORRELATION COEFFICIENTS, C.ij:

A / B / C /

A / 1.0000  
 B / 0.6085 1.0000  
 C / -0.8952 -0.8220 1.0000

Mean value of |C.ij|, i.ne.j = 0.7752

Mean value of C.ij, i.ne.j = -0.3696

No correlations with absolute value greater than 0.9950

Worst fitted lines (obs-calc/error):

1: 2.1    3: -2.1    4: 1.2    2: -0.8

  

|                |            |         |       |
|----------------|------------|---------|-------|
| 1: 1 0 1 0 0 0 | 7155.0931  | 0.0206  | 0.010 |
| 3: 2 0 2 1 0 1 | 13408.4800 | -0.0206 | 0.010 |
| 4: 3 0 3 2 0 2 | 18783.6626 | 0.0122  | 0.010 |
| 2: 2 1 2 1 1 1 | 12543.2359 | -0.0079 | 0.010 |

3SiCPF2 Durig and Laane v0

---

|                                          | obs             | o-c        | error   | blends | Notes |
|------------------------------------------|-----------------|------------|---------|--------|-------|
|                                          |                 |            | o-c     | wt     |       |
| / instead of : below denotes (o-c)>3*err |                 |            |         |        |       |
| 1/                                       | 8 0 8 7 0 7     | 27774.3400 | 0.2597  | 0.050  |       |
| 2/                                       | 8 1 8 7 1 7     | 27607.1200 | 0.3499  | 0.050  |       |
| 3:                                       | 8 2 7 7 2 6     | 27991.7800 | 0.1023  | 0.050  |       |
| 4/                                       | 8 2 6 7 2 5     | 28252.1000 | 0.5245  | 0.050  |       |
| 5/                                       | 8 1 7 7 1 6     | 28320.8900 | 0.3860  | 0.050  |       |
| 6/                                       | 9 1 9 8 1 8     | 31042.2200 | 0.3534  | 0.050  |       |
| 7/                                       | 9 0 9 8 0 8     | 31189.5700 | 0.2126  | 0.050  |       |
| 8:                                       | 9 2 8 8 2 7     | 31475.9300 | -0.0194 | 0.050  |       |
| 9/                                       | 9 3 7 8 3 6     | 31579.2200 | -0.4290 | 0.050  |       |
| 10/                                      | 9 3 6 8 3 5     | 31617.1400 | -0.1922 | 0.050  |       |
| 11/                                      | 9 2 7 8 2 6     | 31824.8200 | 0.7012  | 0.050  |       |
| 12/                                      | 9 1 8 8 1 7     | 31830.9600 | 0.3897  | 0.050  |       |
| 13:                                      | 10 1 10 9 1 9   | 34473.2900 | 0.1354  | 0.050  |       |
| 14:                                      | 10 0 10 9 0 9   | 34597.3700 | -0.0332 | 0.050  |       |
| 15/                                      | 10 2 9 9 2 8    | 34954.9600 | -0.2884 | 0.050  |       |
| 16/                                      | 10 3 8 9 3 7    | 35091.9200 | -0.4296 | 0.050  |       |
| 17/                                      | 10 3 7 9 3 6    | 35155.3700 | -0.2941 | 0.050  |       |
| 18:                                      | 11 1 11 10 1 10 | 37900.9800 | 0.0311  | 0.050  |       |
| 19/                                      | 11 0 11 10 0 10 | 38001.4400 | -0.2007 | 0.050  |       |
| 20/                                      | 11 2 10 10 2 9  | 38428.6800 | -0.5193 | 0.050  |       |
| 21/                                      | 11 3 8 10 3 7   | 38703.8600 | -0.3313 | 0.050  |       |
| 22/                                      | 11 1 10 10 1 9  | 38810.6400 | -0.1632 | 0.050  |       |

---

PARAMETERS IN FIT (values truncated):

|       |        |               |   |
|-------|--------|---------------|---|
| 10000 | A /MHz | 3546.08(19)   | 1 |
| 20000 | B /MHz | 1798.0697(20) | 2 |
| 30000 | C /MHz | 1706.2465(18) | 3 |

MICROWAVE AVG = 0.024792 MHz, IR AVG = 0.00000  
MICROWAVE RMS = 0.335823 MHz, IR RMS = 0.00000  
END OF ITERATION 1 OLD, NEW RMS ERROR= 6.71645 6.71645

distinct frequency lines in fit: 22

distinct parameters of fit: 3

|                             | upper state | lower state | overall |
|-----------------------------|-------------|-------------|---------|
| limits of quantum number 1: | 8 11        | 7 10        | 7 11    |
| limits of quantum number 2: | 0 3         | 0 3         | 0 3     |
| limits of quantum number 3: | 6 11        | 5 10        | 5 11    |

frequency range: 27607 38810

Standard errors are obtained by multiplying the previous errors by: 7.227271

PARAMETERS IN FIT WITH STANDARD ERRORS ON THOSE THAT ARE FITTED:

(values rounded)

|       |        |              |   |
|-------|--------|--------------|---|
| 10000 | A /MHz | 3546.1(14)   | 1 |
| 20000 | B /MHz | 1798.070(14) | 2 |
| 30000 | C /MHz | 1706.247(13) | 3 |

CORRELATION COEFFICIENTS, C.ij:

|   | A       | B       | C      |
|---|---------|---------|--------|
| A | 1.0000  |         |        |
| B | 0.6185  | 1.0000  |        |
| C | -0.7793 | -0.7991 | 1.0000 |

Mean value of |C.ij|, i.ne.j = 0.7323

Mean value of C.ij, i.ne.j = -0.3199

No correlations with absolute value greater than 0.9950

Worst fitted lines (obs-calc/error):

11: 14.0      4: 10.5      20: -10.4      16: -8.6  
 9: -8.6      12: 7.8      5: 7.7      6: 7.1  
 2: 7.0      21: -6.6      17: -5.9      15: -5.8  
 1: 5.2      7: 4.3      19: -4.0      10: -3.8  
 22: -3.3      13: 2.7      3: 2.0      14: -0.7  
 18: 0.6      8: -0.4

11/ 9 2 7 8 2 6      31824.8200 0.7012 0.050  
 4/ 8 2 6 7 2 5      28252.1000 0.5245 0.050  
 20/ 11 2 10 10 2 9      38428.6800 -0.5193 0.050  
 16/ 10 3 8 9 3 7      35091.9200 -0.4296 0.050  
 9/ 9 3 7 8 3 6      31579.2200 -0.4290 0.050  
 12/ 9 1 8 8 1 7      31830.9600 0.3897 0.050  
 5/ 8 1 7 7 1 6      28320.8900 0.3860 0.050  
 6/ 9 1 9 8 1 8      31042.2200 0.3534 0.050  
 2/ 8 1 8 7 1 7      27607.1200 0.3499 0.050  
 21/ 11 3 8 10 3 7      38703.8600 -0.3313 0.050

---



3SiCPF2 Durig and Laane v1

---

|                                          | obs             | o-c | error      | blends  | Notes |
|------------------------------------------|-----------------|-----|------------|---------|-------|
|                                          |                 |     | o-c        | wt      |       |
| / instead of : below denotes (o-c)>3*err |                 |     |            |         |       |
| 1/                                       | 8 0 8 7 0 7     |     | 27885.8900 | 0.3057  | 0.050 |
| 2/                                       | 8 1 8 7 1 7     |     | 27720.1000 | 0.2804  | 0.050 |
| 3:                                       | 9 1 9 8 1 8     |     | 31170.2400 | 0.1346  | 0.050 |
| 4/                                       | 9 0 9 8 0 8     |     | 31317.9600 | 0.1927  | 0.050 |
| 5:                                       | 10 0 10 9 0 9   |     | 34742.4700 | -0.0914 | 0.050 |
| 6:                                       | 10 1 10 9 1 9   |     | 34616.7900 | 0.0113  | 0.050 |
| 7/                                       | 10 2 9 9 2 8    |     | 35077.9000 | -0.1539 | 0.050 |
| 8/                                       | 11 0 11 10 0 10 |     | 38162.9600 | -0.2503 | 0.050 |
| 9/                                       | 11 1 11 10 1 10 |     | 38059.8800 | -0.2310 | 0.050 |

---

PARAMETERS IN FIT (values truncated):

|                                                        |        |               |   |
|--------------------------------------------------------|--------|---------------|---|
| 10000                                                  | A /MHz | 3543.57(40)   | 1 |
| 20000                                                  | B /MHz | 1801.8784(81) | 2 |
| 30000                                                  | C /MHz | 1714.0210(30) | 3 |
| MICROWAVE AVG = 0.022026 MHz, IR AVG = 0.00000         |        |               |   |
| MICROWAVE RMS = 0.204300 MHz, IR RMS = 0.00000         |        |               |   |
| END OF ITERATION 1 OLD, NEW RMS ERROR= 4.08599 4.08599 |        |               |   |

distinct frequency lines in fit: 9

distinct parameters of fit: 3

|                             | upper state | lower state | overall |
|-----------------------------|-------------|-------------|---------|
| limits of quantum number 1: | 8 11        | 7 10        | 7 11    |
| limits of quantum number 2: | 0 2         | 0 2         | 0 2     |
| limits of quantum number 3: | 8 11        | 7 10        | 7 11    |

frequency range: 27720 38162

Standard errors are obtained by multiplying the previous errors by: 5.004295

PARAMETERS IN FIT WITH STANDARD ERRORS ON THOSE THAT ARE FITTED:

(values rounded)

|       |        |              |   |
|-------|--------|--------------|---|
| 10000 | A /MHz | 3543.6(20)   | 1 |
| 20000 | B /MHz | 1801.878(40) | 2 |
| 30000 | C /MHz | 1714.021(15) | 3 |

CORRELATION COEFFICIENTS, C.ij:

|   | A       | B       | C      |
|---|---------|---------|--------|
| A | 1.0000  |         |        |
| B | 0.2360  | 1.0000  |        |
| C | -0.7995 | -0.6690 | 1.0000 |

Mean value of |C.ij|, i.ne.j = 0.5682

Mean value of C.ij, i.ne.j = -0.4108

No correlations with absolute value greater than 0.9950

Worst fitted lines (obs-calc/error):

1: 6.1    2: 5.6    8: -5.0    9: -4.6  
 4: 3.9    7: -3.1    3: 2.7    5: -1.8  
 6: 0.2

1/ 8 0 8 7 0 7            27885.8900 0.3057 0.050  
 2/ 8 1 8 7 1 7            27720.1000 0.2804 0.050  
 8/ 11 0 11 10 0 10            38162.9600 -0.2503 0.050  
 9/ 11 1 11 10 1 10            38059.8800 -0.2310 0.050  
 4/ 9 0 9 8 0 8            31317.9600 0.1927 0.050  
 7/ 10 2 9 9 2 8            35077.9000 -0.1539 0.050  
 3: 9 1 9 8 1 8            31170.2400 0.1346 0.050  
 5: 10 0 10 9 0 9            34742.4700 -0.0914 0.050  
 6: 10 1 10 9 1 9            34616.7900 0.0113 0.050

---

/ SPFIT output reformatted with PIFORM

3SiCPF2 Durig and Laane v2

-----  
 =====

| obs | o-c | error | blends | Notes |
|-----|-----|-------|--------|-------|
|     | o-c |       | wt     |       |

/ instead of : below denotes (o-c)>3\*err

-----  
 =====

1/ 8 1 8 7 1 7            27814.1100 0.1774 0.050  
 2: 9 1 9 8 1 8            31276.9100 0.1004 0.050  
 3/ 9 0 9 8 0 8            31424.2100 -0.2435 0.050  
 4/ 10 0 10 9 0 9            34863.3500 0.2116 0.050  
 5: 10 1 10 9 1 9            34736.2100 -0.0216 0.050  
 6: 11 0 11 10 0 10            38297.4600 0.0332 0.050  
 7/ 11 1 11 10 1 10            38192.2200 -0.2179 0.050

-----  
PARAMETERS IN FIT (values truncated):

|       |        |               |   |
|-------|--------|---------------|---|
| 10000 | A /MHz | 3542.20(54)   | 1 |
| 20000 | B /MHz | 1805.187(43)  | 2 |
| 30000 | C /MHz | 1720.4696(89) | 3 |

MICROWAVE AVG = 0.005666 MHz, IR AVG = 0.00000  
MICROWAVE RMS = 0.166795 MHz, IR RMS = 0.00000  
END OF ITERATION 1 OLD, NEW RMS ERROR= 3.33590 3.33590

distinct frequency lines in fit: 7

distinct parameters of fit: 3

|                             | upper state | lower state | overall |
|-----------------------------|-------------|-------------|---------|
| limits of quantum number 1: | 8 11        | 7 10        | 7 11    |
| limits of quantum number 2: | 0 1         | 0 1         | 0 1     |
| limits of quantum number 3: | 8 11        | 7 10        | 7 11    |

frequency range: 27814 38297

Standard errors are obtained by multiplying the previous errors by: 4.412981

PARAMETERS IN FIT WITH STANDARD ERRORS ON THOSE THAT ARE FITTED:

(values rounded)

|       |        |              |   |
|-------|--------|--------------|---|
| 10000 | A /MHz | 3542.2(23)   | 1 |
| 20000 | B /MHz | 1805.19(18)  | 2 |
| 30000 | C /MHz | 1720.470(39) | 3 |

CORRELATION COEFFICIENTS, C.ij:

|   | A       | B       | C      |
|---|---------|---------|--------|
| A | 1.0000  |         |        |
| B | 0.6421  | 1.0000  |        |
| C | -0.7967 | -0.9646 | 1.0000 |

Mean value of |C.ij|, i.ne.j = 0.8011

Mean value of C.ij, i.ne.j = -0.3731

No correlations with absolute value greater than 0.9950

Worst fitted lines (obs-calc/error):

3: -4.9      7: -4.4      4: 4.2      1: 3.5  
2: 2.0      6: 0.7      5: -0.4

|                    |            |         |       |
|--------------------|------------|---------|-------|
| 3/ 9 0 9 8 0 8     | 31424.2100 | -0.2435 | 0.050 |
| 7/ 11 1 11 10 1 10 | 38192.2200 | -0.2179 | 0.050 |
| 4/ 10 0 10 9 0 9   | 34863.3500 | 0.2116  | 0.050 |
| 1/ 8 1 8 7 1 7     | 27814.1100 | 0.1774  | 0.050 |
| 2: 9 1 9 8 1 8     | 31276.9100 | 0.1004  | 0.050 |
| 6: 11 0 11 10 0 10 | 38297.4600 | 0.0332  | 0.050 |
| 5: 10 1 10 9 1 9   | 34736.2100 | -0.0216 | 0.050 |

3SiCPF2 Durig and Laane v3

---

|  | obs | o-c | error | blends | Notes |
|--|-----|-----|-------|--------|-------|
|  |     |     | o-c   | wt     |       |

/ instead of : below denotes (o-c)>3\*err

---

|    |                 |            |         |       |  |
|----|-----------------|------------|---------|-------|--|
| 1: | 8 1 8 7 1 7     | 27896.8500 | -0.0098 | 0.050 |  |
| 2: | 9 1 9 8 1 8     | 31370.9200 | 0.0250  | 0.050 |  |
| 3: | 10 1 10 9 1 9   | 34841.5000 | -0.0215 | 0.050 |  |
| 4: | 11 1 11 10 1 10 | 38308.9100 | 0.0063  | 0.050 |  |

---

PARAMETERS IN FIT (values truncated):

|       |        |             |   |
|-------|--------|-------------|---|
| 10000 | A /MHz | 3830.(147)  | 1 |
| 20000 | B /MHz | 1811.7(17)  | 2 |
| 30000 | C /MHz | 1724.87(62) | 3 |

MICROWAVE AVG = -0.000012 MHz, IR AVG = 0.00000  
 MICROWAVE RMS = 0.017535 MHz, IR RMS = 0.00000  
 END OF ITERATION 1 OLD, NEW RMS ERROR= 0.35071 0.35071

distinct frequency lines in fit: 4

distinct parameters of fit: 3

|                             | upper state | lower state | overall |
|-----------------------------|-------------|-------------|---------|
| limits of quantum number 1: | 8 11        | 7 10        | 7 11    |
| limits of quantum number 2: | 1 1         | 1 1         | 1 1     |
| limits of quantum number 3: | 8 11        | 7 10        | 7 11    |

frequency range: 27896 38308

Standard errors are obtained by multiplying the previous errors by: 0.701420

PARAMETERS IN FIT WITH STANDARD ERRORS ON THOSE THAT ARE FITTED:

(values rounded)

|       |        |             |   |
|-------|--------|-------------|---|
| 10000 | A /MHz | 3830.(103)  | 1 |
| 20000 | B /MHz | 1811.7(12)  | 2 |
| 30000 | C /MHz | 1724.87(43) | 3 |

CORRELATION COEFFICIENTS, C.ij:

|   | A       | B       | C      |
|---|---------|---------|--------|
| A | 1.0000  |         |        |
| B | 0.9991  | 1.0000  |        |
| C | -0.9998 | -0.9998 | 1.0000 |

Mean value of  $|C_{ij}|$ ,  $i \neq j = 0.9996$

Mean value of  $C_{ij}$ ,  $i \neq j = -0.3335$

Worst correlations, with absolute value greater than 0.9950:

|         |     |         |           |
|---------|-----|---------|-----------|
| 20000 B | <-> | 10000 A | 0.999124  |
| 30000 C | <-> | 10000 A | -0.999756 |
| 30000 C | <-> | 20000 B | -0.999799 |

Worst fitted lines (obs-calc/error):

|    |                 |            |         |       |      |    |     |
|----|-----------------|------------|---------|-------|------|----|-----|
| 2: | 0.5             | 3:         | -0.4    | 1:    | -0.2 | 4: | 0.1 |
| 2: | 9 1 9 8 1 8     | 31370.9200 | 0.0250  | 0.050 |      |    |     |
| 3: | 10 1 10 9 1 9   | 34841.5000 | -0.0215 | 0.050 |      |    |     |
| 1: | 8 1 8 7 1 7     | 27896.8500 | -0.0098 | 0.050 |      |    |     |
| 4: | 11 1 11 10 1 10 | 38308.9100 | 0.0063  | 0.050 |      |    |     |

---

/ SPFIT output reformatted with PIFORM

Holding Coriolis 3SiCPF2

---

|                                          | obs             | o-c       | error   | blends | Notes        |
|------------------------------------------|-----------------|-----------|---------|--------|--------------|
|                                          |                 | o-c       | wt      |        |              |
| / instead of : below denotes (o-c)>3*err |                 |           |         |        |              |
| 1:                                       | 2 1 2 0 1 1 1 0 | 6917.0167 | -0.0021 | 0.010  |              |
| 2:                                       | 2 1 2 1 1 1 1 1 | 6917.0190 | -0.0007 | 0.010  |              |
| 3:                                       | 2 0 2 0 1 0 1 0 | 7005.3453 | -0.0046 | 0.010  |              |
| 4:                                       | 2 0 2 1 1 0 1 1 | 7005.3468 | -0.0055 | 0.010  |              |
| 5:                                       | 2 1 1 0 1 1 0 0 | 7100.6875 | -0.0030 | 0.010  |              |
| 6:                                       | 3 2 2 0 3 0 3 0 | 7186.1321 | -0.0171 | 0.010  |              |
| 7:                                       | 4 2 3 0 4 0 4 0 | 7218.1642 | -0.0099 | 0.010  |              |
| 8:                                       | 5 2 4 0 5 0 5 0 | 7279.1347 | 0.0239  | 0.010  |              |
| 9:                                       | 2 1 2 0 1 1 1 0 | 6917.0151 | -0.0037 | 0.010  | -0.0042 0.50 |
| 10:                                      | 2 1 2 1 1 1 1 1 | 6917.0151 | -0.0047 | 0.010  | -0.0042 0.50 |



|                     |            |         |       |         |      |
|---------------------|------------|---------|-------|---------|------|
| 11: 2 0 2 0 1 0 1 0 | 7005.3482  | -0.0017 | 0.010 | -0.0030 | 0.50 |
| 12: 2 0 2 1 1 0 1 1 | 7005.3482  | -0.0041 | 0.010 | -0.0030 | 0.50 |
| 13: 2 1 1 0 1 1 0 0 | 7100.6825  | -0.0080 | 0.010 |         |      |
| 14: 3 2 2 0 3 0 3 0 | 7186.1321  | -0.0171 | 0.010 |         |      |
| 15: 4 2 3 0 4 0 4 0 | 7218.1618  | -0.0123 | 0.010 |         |      |
| 16/ 5 2 4 0 5 0 5 0 | 7279.1432  | 0.0325  | 0.010 |         |      |
| 17: 3 1 3 0 2 1 2 0 | 10373.3425 | -0.0089 | 0.010 |         |      |
| 18: 3 0 3 0 2 0 2 0 | 10499.2285 | 0.0011  | 0.010 |         |      |
| 19: 3 2 2 0 2 2 1 0 | 10513.1606 | 0.0005  | 0.010 |         |      |
| 20: 3 2 1 0 2 2 0 0 | 10527.2463 | 0.0019  | 0.010 |         |      |
| 21: 3 1 2 0 2 1 1 0 | 10648.7744 | 0.0003  | 0.010 |         |      |
| 22: 4 1 4 0 3 1 3 0 | 13827.1864 | -0.0025 | 0.010 | -0.0018 | 0.50 |
| 23: 4 1 4 1 3 1 3 1 | 13827.1864 | -0.0011 | 0.010 | -0.0018 | 0.50 |
| 24: 4 0 4 0 3 0 3 0 | 13982.7281 | -0.0178 | 0.010 |         |      |
| 25: 4 2 3 0 3 2 2 0 | 14014.7855 | 0.0146  | 0.010 |         |      |
| 26: 4 3 2 0 3 3 1 0 | 14024.1248 | -0.0077 | 0.010 |         |      |
| 27: 4 3 1 0 3 3 0 0 | 14024.6266 | -0.0061 | 0.010 |         |      |
| 28: 4 2 2 0 3 2 1 0 | 14049.7693 | 0.0117  | 0.010 | 0.0124  | 0.50 |
| 29: 4 2 2 1 3 2 1 1 | 14049.7693 | 0.0131  | 0.010 | 0.0124  | 0.50 |
| 30: 4 1 3 1 3 1 2 1 | 14194.0110 | -0.0030 | 0.010 | -0.0076 | 0.50 |
| 31: 4 1 3 0 3 1 2 0 | 14194.0110 | -0.0120 | 0.010 | -0.0076 | 0.50 |
| 32: 5 1 5 0 4 1 4 0 | 17277.9158 | 0.0266  | 0.010 | 0.0273  | 0.50 |
| 33: 5 1 5 1 4 1 4 1 | 17277.9158 | 0.0279  | 0.010 | 0.0273  | 0.50 |
| 34: 5 0 5 0 4 0 4 0 | 17453.0393 | -0.0294 | 0.010 |         |      |
| 35/ 5 0 5 1 4 0 4 1 | 17453.1552 | 0.0385  | 0.010 |         |      |
| 36: 5 2 4 0 4 2 3 0 | 17513.9781 | -0.0272 | 0.010 |         |      |
| 37: 5 2 4 1 4 2 3 1 | 17514.0783 | 0.0286  | 0.010 |         |      |
| 38/ 5 4 2 1 4 4 1 1 | 17529.0060 | -0.0301 | 0.010 |         |      |
| 39/ 5 4 2 0 4 4 1 0 | 17529.1118 | 0.0712  | 0.010 |         |      |
| 40/ 5 3 3 1 4 3 2 1 | 17532.8218 | -0.0374 | 0.010 |         |      |

|     |           |         |            |         |       |
|-----|-----------|---------|------------|---------|-------|
| 41: | 5 3 3 0   | 4 3 2 0 | 17532.9140 | 0.0086  | 0.010 |
| 42/ | 5 3 2 1   | 4 3 1 1 | 17534.5832 | -0.0503 | 0.010 |
| 43: | 5 3 2 0   | 4 3 1 0 | 17534.6821 | 0.0300  | 0.010 |
| 44: | 5 2 3 0   | 4 2 2 0 | 17583.0556 | -0.0125 | 0.010 |
| 45: | 5 1 4 1   | 4 1 3 1 | 17735.2402 | -0.0208 | 0.010 |
| 46/ | 5 1 4 0   | 4 1 3 0 | 17735.3261 | 0.0361  | 0.010 |
| 47: | 8 0 8 0   | 7 0 7 0 | 27774.3400 | 0.0013  | 0.050 |
| 48: | 8 1 8 0   | 7 1 7 0 | 27607.1200 | -0.0104 | 0.050 |
| 49: | 8 2 7 0   | 7 2 6 0 | 27991.7800 | 0.1116  | 0.050 |
| 50: | 8 2 6 0   | 7 2 5 0 | 28252.1000 | 0.0368  | 0.050 |
| 51: | 8 1 7 0   | 7 1 6 0 | 28320.8900 | 0.0204  | 0.050 |
| 52: | 9 1 9 0   | 8 1 8 0 | 31042.2200 | 0.0934  | 0.050 |
| 53: | 9 0 9 0   | 8 0 8 0 | 31189.5700 | 0.0957  | 0.050 |
| 54/ | 9 2 8 0   | 8 2 7 0 | 31475.9300 | 0.2142  | 0.050 |
| 55/ | 9 3 7 0   | 8 3 6 0 | 31579.2200 | -1.1108 | 0.050 |
| 56: | 9 3 6 0   | 8 3 5 0 | 31617.1400 | -0.0262 | 0.050 |
| 57/ | 9 2 7 0   | 8 2 6 0 | 31824.8200 | 0.2603  | 0.050 |
| 58/ | 9 1 8 0   | 8 1 7 0 | 31830.9600 | 0.1968  | 0.050 |
| 59: | 10 1 10 0 | 9 1 9 0 | 34473.2900 | 0.0237  | 0.050 |
| 60: | 10 0 10 0 | 9 0 9 0 | 34597.3700 | 0.0269  | 0.050 |

-----

PARAMETERS IN FIT (values truncated):

|       |          |                |   |
|-------|----------|----------------|---|
| 10099 | A /MHz   | 3544.4281(15)  | 1 |
| 20099 | B /MHz   | 1798.13899(81) | 2 |
| 30099 | C /MHz   | 1706.30313(80) | 3 |
| 299   | DJ /kHz  | 0.1905(62)     | 4 |
| 1199  | DJK /kHz | 5.750(43)      | 5 |

210001 Fbc /MHz [ 0.861530104] 6

11 E1 /MHz [11805.724020849] 7

MICROWAVE AVG = -0.001555 MHz, IR AVG = 0.00000

MICROWAVE RMS = 0.163393 MHz, IR RMS = 0.00000

END OF ITERATION 1 OLD, NEW RMS ERROR= 3.79668 3.79668

distinct frequency lines in fit: 54

distinct parameters of fit: 5

MICROWAVE lines fitted lines lines RMS RMS ERROR J range Ka range freq.  
range

total dv=0 dv.ne.0 UNFITTD e>900

v"= 0 45 45 0 0 0 0.178496 3.94752 1 10 0 4 6917 34597

v"= 1 9 9 0 0 0 0.029165 2.91654 1 5 0 4 6917 17735

-----  
total: 54 54 0 0 0 0.163378 3.79519

Standard errors are obtained by multiplying the previous errors by: 3.985684

PARAMETERS IN FIT WITH STANDARD ERRORS ON THOSE THAT ARE FITTED:

(values rounded)

10099 A /MHz 3544.4281(60) 1

20099 B /MHz 1798.1390(32) 2

30099 C /MHz 1706.3031(31) 3

299 DJ /kHz 0.191(24) 4

1199 DJK /kHz 5.75(17) 5

210001 Fbc /MHz [ 0.861530104] 6

11 E1 /MHz [11805.724020849] 7

CORRELATION COEFFICIENTS, C.ij:

|      | A       | B       | C       | -DJ     | -DJK   |
|------|---------|---------|---------|---------|--------|
| A    | 1.0000  |         |         |         |        |
| B    | 0.1589  | 1.0000  |         |         |        |
| C    | 0.3843  | -0.4718 | 1.0000  |         |        |
| -DJ  | -0.2038 | -0.2016 | -0.5254 | 1.0000  |        |
| -DJK | -0.6255 | -0.4547 | -0.0023 | -0.0729 | 1.0000 |

Mean value of |C.ij|, i.ne.j = 0.3101

Mean value of C.ij, i.ne.j = -0.2015

No correlations with absolute value greater than 0.9950

Worst fitted lines (obs-calc/error):

|           |          |          |          |
|-----------|----------|----------|----------|
| 55: -22.2 | 39: 7.1  | 57: 5.2  | 42: -5.0 |
| 54: 4.3   | 58: 3.9  | 35: 3.9  | 40: -3.7 |
| 46: 3.6   | 16: 3.2  | 38: -3.0 | 43: 3.0  |
| 34: -2.9  | 37: 2.9  | 32: 2.7  | 36: -2.7 |
| 8: 2.4    | 49: 2.2  | 45: -2.1 | 53: 1.9  |
| 52: 1.9   | 24: -1.8 | 6: -1.7  | 14: -1.7 |
| 25: 1.5   | 44: -1.2 | 28: 1.2  | 15: -1.2 |

7: -1.0    17: -0.9    41: 0.9    13: -0.8  
26: -0.8    30: -0.8    50: 0.7    27: -0.6  
4: -0.5    60: 0.5    56: -0.5    59: 0.5  
3: -0.5    9: -0.4    51: 0.4    5: -0.3  
11: -0.3    1: -0.2    48: -0.2    20: 0.2  
22: -0.2    18: 0.1

55/ 9 3 7 0 8 3 6 0    31579.2200 -1.1108 0.050  
39/ 5 4 2 0 4 4 1 0    17529.1118 0.0712 0.010  
57/ 9 2 7 0 8 2 6 0    31824.8200 0.2603 0.050  
42/ 5 3 2 1 4 3 1 1    17534.5832 -0.0503 0.010  
54/ 9 2 8 0 8 2 7 0    31475.9300 0.2142 0.050  
58/ 9 1 8 0 8 1 7 0    31830.9600 0.1968 0.050  
35/ 5 0 5 1 4 0 4 1    17453.1552 0.0385 0.010  
40/ 5 3 3 1 4 3 2 1    17532.8218 -0.0374 0.010  
46/ 5 1 4 0 4 1 3 0    17735.3261 0.0361 0.010  
16/ 5 2 4 0 5 0 5 0    7279.1432 0.0325 0.010

---

/ SPFIT output reformatted with PIFORM

## Adjusted Transitions

---

|                                          | obs     | o-c     | error      | blends  | Notes              |
|------------------------------------------|---------|---------|------------|---------|--------------------|
|                                          |         |         | o-c        | wt      |                    |
| / instead of : below denotes (o-c)>3*err |         |         |            |         |                    |
| 1:                                       | 2 1 2 0 | 1 1 1 0 | 6917.0167  | 0.0000  | 0.010              |
| 2:                                       | 2 1 2 1 | 1 1 1 1 | 6917.0190  | 0.0012  | 0.010              |
| 3:                                       | 2 0 2 0 | 1 0 1 0 | 7005.3453  | -0.0003 | 0.010              |
| 4:                                       | 2 0 2 1 | 1 0 1 1 | 7005.3468  | -0.0013 | 0.010              |
| 5:                                       | 2 1 1 0 | 1 1 0 0 | 7100.6875  | 0.0025  | 0.010              |
| 6:                                       | 3 2 2 0 | 3 0 3 0 | 7186.1321  | -0.0059 | 0.010              |
| 7:                                       | 4 2 3 0 | 4 0 4 0 | 7218.1642  | -0.0069 | 0.010              |
| 8:                                       | 5 2 4 0 | 5 0 5 0 | 7279.1347  | 0.0097  | 0.010              |
| 9:                                       | 2 1 2 0 | 1 1 1 0 | 6917.0151  | -0.0017 | 0.010 -0.0022 0.50 |
| 10:                                      | 2 1 2 1 | 1 1 1 1 | 6917.0151  | -0.0027 | 0.010 -0.0022 0.50 |
| 11:                                      | 2 0 2 0 | 1 0 1 0 | 7005.3482  | 0.0024  | 0.010 0.0013 0.50  |
| 12:                                      | 2 0 2 1 | 1 0 1 1 | 7005.3482  | 0.0000  | 0.010 0.0013 0.50  |
| 13:                                      | 2 1 1 0 | 1 1 0 0 | 7100.6825  | -0.0024 | 0.010              |
| 14:                                      | 3 2 2 0 | 3 0 3 0 | 7186.1321  | -0.0059 | 0.010              |
| 15:                                      | 4 2 3 0 | 4 0 4 0 | 7218.1618  | -0.0093 | 0.010              |
| 16:                                      | 5 2 4 0 | 5 0 5 0 | 7279.1432  | 0.0182  | 0.010              |
| 17:                                      | 3 1 3 0 | 2 1 2 0 | 10373.3425 | -0.0077 | 0.010              |
| 18:                                      | 3 0 3 0 | 2 0 2 0 | 10499.2285 | 0.0069  | 0.010              |
| 19:                                      | 3 2 2 0 | 2 2 1 0 | 10513.1606 | 0.0034  | 0.010              |
| 20:                                      | 3 2 1 0 | 2 2 0 0 | 10527.2463 | 0.0053  | 0.010              |
| 21:                                      | 3 1 2 0 | 2 1 1 0 | 10648.7744 | 0.0068  | 0.010              |
| 22:                                      | 4 1 4 0 | 3 1 3 0 | 13827.1864 | -0.0040 | 0.010 -0.0034 0.50 |
| 23:                                      | 4 1 4 1 | 3 1 3 1 | 13827.1864 | -0.0027 | 0.010 -0.0034 0.50 |

---

|                     |            |         |       |         |      |
|---------------------|------------|---------|-------|---------|------|
| 24: 4 0 4 0 3 0 3 0 | 13982.7281 | -0.0113 | 0.010 |         |      |
| 25: 4 2 3 0 3 2 2 0 | 14014.7855 | 0.0129  | 0.010 |         |      |
| 26: 4 3 2 0 3 3 1 0 | 14024.1248 | -0.0055 | 0.010 |         |      |
| 27: 4 3 1 0 3 3 0 0 | 14024.6266 | -0.0032 | 0.010 |         |      |
| 28: 4 2 2 0 3 2 1 0 | 14049.7693 | 0.0113  | 0.010 | 0.0120  | 0.50 |
| 29: 4 2 2 1 3 2 1 1 | 14049.7693 | 0.0126  | 0.010 | 0.0120  | 0.50 |
| 30: 4 1 3 1 3 1 2 1 | 14194.0110 | 0.0017  | 0.010 | -0.0027 | 0.50 |
| 31: 4 1 3 0 3 1 2 0 | 14194.0110 | -0.0071 | 0.010 | -0.0027 | 0.50 |
| 32: 5 1 5 0 4 1 4 0 | 17277.9158 | 0.0199  | 0.010 | 0.0205  | 0.50 |
| 33: 5 1 5 1 4 1 4 1 | 17277.9158 | 0.0211  | 0.010 | 0.0205  | 0.50 |
| 34: 5 0 5 0 4 0 4 0 | 17453.0393 | -0.0233 | 0.010 |         |      |
| 35/ 5 0 5 1 4 0 4 1 | 17453.1552 | 0.0446  | 0.010 |         |      |
| 36/ 5 2 4 0 4 2 3 0 | 17513.9781 | -0.0383 | 0.010 |         |      |
| 37: 5 2 4 1 4 2 3 1 | 17514.0783 | 0.0175  | 0.010 |         |      |
| 38: 5 4 2 1 4 4 1 1 | 17529.0060 | -0.0298 | 0.010 |         |      |
| 39/ 5 4 2 0 4 4 1 0 | 17529.1118 | 0.0715  | 0.010 |         |      |
| 40/ 5 3 3 1 4 3 2 1 | 17532.8218 | -0.0428 | 0.010 |         |      |
| 41: 5 3 3 0 4 3 2 0 | 17532.9140 | 0.0034  | 0.010 |         |      |
| 42/ 5 3 2 1 4 3 1 1 | 17534.5832 | -0.0533 | 0.010 |         |      |
| 43: 5 3 2 0 4 3 1 0 | 17534.6821 | 0.0271  | 0.010 |         |      |
| 44: 5 2 3 0 4 2 2 0 | 17583.0556 | -0.0208 | 0.010 |         |      |
| 45: 5 1 4 1 4 1 3 1 | 17735.2402 | -0.0213 | 0.010 |         |      |
| 46/ 5 1 4 0 4 1 3 0 | 17735.3261 | 0.0358  | 0.010 |         |      |
| 47: 8 0 8 0 7 0 7 0 | 27774.3400 | -0.0052 | 0.050 |         |      |
| 48: 8 1 8 0 7 1 7 0 | 27607.1200 | -0.0488 | 0.050 |         |      |
| 49: 8 2 7 0 7 2 6 0 | 27991.7800 | 0.0329  | 0.050 |         |      |
| 50: 8 2 6 0 7 2 5 0 | 28252.1000 | -0.0296 | 0.050 |         |      |
| 51: 8 1 7 0 7 1 6 0 | 28320.8900 | -0.0327 | 0.050 |         |      |
| 52: 9 1 9 0 8 1 8 0 | 31042.2200 | 0.0394  | 0.050 |         |      |
| 53: 9 0 9 0 8 0 8 0 | 31189.5700 | 0.0790  | 0.050 |         |      |

|     |                   |            |         |       |
|-----|-------------------|------------|---------|-------|
| 54: | 9 2 8 0 8 2 7 0   | 31475.9300 | 0.0965  | 0.050 |
| 55/ | 9 3 7 1 8 3 6 1   | 31579.2200 | -0.2349 | 0.050 |
| 56: | 9 3 6 0 8 3 5 0   | 31617.1400 | -0.0868 | 0.050 |
| 57/ | 9 2 7 0 8 2 6 0   | 31824.8200 | 0.1590  | 0.050 |
| 58: | 9 1 8 0 8 1 7 0   | 31830.9600 | 0.1063  | 0.050 |
| 59: | 10 1 10 0 9 1 9 0 | 34473.2900 | -0.0481 | 0.050 |
| 60: | 10 0 10 0 9 0 9 0 | 34597.3700 | -0.0034 | 0.050 |

-----

PARAMETERS IN FIT (values truncated):

|        |          |                   |   |
|--------|----------|-------------------|---|
| 10099  | A /MHz   | 3543.62(20)       | 1 |
| 20099  | B /MHz   | 1798.13696(88)    | 2 |
| 30099  | C /MHz   | 1706.30289(92)    | 3 |
| 299    | DJ /kHz  | 0.1857(88)        | 4 |
| 1199   | DJK /kHz | 5.607(51)         | 5 |
| 2099   | DK /kHz  | -200.(50)         | 6 |
| 210001 | Fbc /MHz | [ 0.861530104]    | 7 |
| 11     | E1 /MHz  | [11805.724020849] | 8 |

MICROWAVE AVG = 0.000486 MHz, IR AVG = 0.00000

MICROWAVE RMS = 0.051632 MHz, IR RMS = 0.00000

END OF ITERATION 1 OLD, NEW RMS ERROR= 2.13760 2.13760

distinct frequency lines in fit: 54

distinct parameters of fit: 6



MICROWAVE lines fitted lines lines RMS RMS ERROR J range Ka range freq.  
range

total dv=0 dv.ne.0 UNFITTD e>900  
v"= 0 44 44 0 0 0 0.042724 1.78971 1 10 0 4 6917 34597  
v"= 1 10 10 0 0 0 0.079686 3.24460 1 9 0 4 6917 31579

-----  
total: 54 54 0 0 0 0.051607 2.13528

Standard errors are obtained by multiplying the previous errors by: 2.267267

PARAMETERS IN FIT WITH STANDARD ERRORS ON THOSE THAT ARE FITTED:

(values rounded)

|        |          |                   |   |
|--------|----------|-------------------|---|
| 10099  | A /MHz   | 3543.62(45)       | 1 |
| 20099  | B /MHz   | 1798.1370(19)     | 2 |
| 30099  | C /MHz   | 1706.3029(20)     | 3 |
| 299    | DJ /kHz  | 0.186(19)         | 4 |
| 1199   | DJK /kHz | 5.61(11)          | 5 |
| 2099   | DK /kHz  | -200.(113)        | 6 |
| 210001 | Fbc /MHz | [ 0.861530104]    | 7 |
| 11     | E1 /MHz  | [11805.724020849] | 8 |

-----  
Worst fitted constants, with greater than 20% uncertainty: %

|      |         |            |   |      |
|------|---------|------------|---|------|
| 2099 | DK /kHz | -200.(113) | 6 | 56.7 |
|------|---------|------------|---|------|

-----

CORRELATION COEFFICIENTS, C.ij:

|      | A       | B       | C       | -DJ     | -DJK   | -DK    |
|------|---------|---------|---------|---------|--------|--------|
| A    | 1.0000  |         |         |         |        |        |
| B    | 0.3951  | 1.0000  |         |         |        |        |
| C    | -0.4945 | -0.5722 | 1.0000  |         |        |        |
| -DJ  | 0.7150  | 0.1528  | -0.6742 | 1.0000  |        |        |
| -DJK | -0.5391 | -0.5638 | 0.2643  | -0.4262 | 1.0000 |        |
| -DK  | -1.0000 | -0.3940 | 0.4970  | -0.7161 | 0.5351 | 1.0000 |

Mean value of |C.ij|, i.ne.j = 0.5293

Mean value of C.ij, i.ne.j = -0.1880

Worst correlations, with absolute value greater than 0.9950:

2099 -DK <-> 10099 A -0.999971

Worst fitted lines (obs-calc/error):

|          |          |          |          |
|----------|----------|----------|----------|
| 39: 7.1  | 42: -5.3 | 55: -4.7 | 35: 4.5  |
| 40: -4.3 | 36: -3.8 | 46: 3.6  | 57: 3.2  |
| 38: -3.0 | 43: 2.7  | 34: -2.3 | 45: -2.1 |
| 58: 2.1  | 44: -2.1 | 32: 2.1  | 54: 1.9  |
| 16: 1.8  | 37: 1.8  | 56: -1.7 | 53: 1.6  |
| 25: 1.3  | 28: 1.2  | 24: -1.1 | 48: -1.0 |
| 8: 1.0   | 59: -1.0 | 15: -0.9 | 52: 0.8  |
| 17: -0.8 | 7: -0.7  | 18: 0.7  | 21: 0.7  |

49: 0.7    51: -0.7    50: -0.6    6: -0.6  
 14: -0.6    26: -0.5    20: 0.5    41: 0.3  
 19: 0.3    22: -0.3    27: -0.3    30: -0.3  
 5: 0.2    13: -0.2    9: -0.2    4: -0.1  
 11: 0.1    2: 0.1

39/ 5 4 2 0 4 4 1 0    17529.1118 0.0715 0.010  
 42/ 5 3 2 1 4 3 1 1    17534.5832 -0.0533 0.010  
 55/ 9 3 7 1 8 3 6 1    31579.2200 -0.2349 0.050  
 35/ 5 0 5 1 4 0 4 1    17453.1552 0.0446 0.010  
 40/ 5 3 3 1 4 3 2 1    17532.8218 -0.0428 0.010  
 36/ 5 2 4 0 4 2 3 0    17513.9781 -0.0383 0.010  
 46/ 5 1 4 0 4 1 3 0    17735.3261 0.0358 0.010  
 57/ 9 2 7 0 8 2 6 0    31824.8200 0.1590 0.050  
 38: 5 4 2 1 4 4 1 1    17529.0060 -0.0298 0.010  
 43: 5 3 2 0 4 3 1 0    17534.6821 0.0271 0.010

---

/ SPFIT output reformatted with PIFORM

Fit Coriolis

```

-----
obs      o-c    error  blends  Notes
              o-c    wt
/ instead of : below denotes (o-c)>3*err
-----
1: 2 1 2 0 1 1 1 0    6917.0167 0.0029 0.010
2: 2 1 2 1 1 1 1 1    6917.0190 0.0044 0.010
3: 2 0 2 0 1 0 1 0    7005.3453 -0.0012 0.010

```

|                     |            |         |       |         |      |
|---------------------|------------|---------|-------|---------|------|
| 4: 2 0 2 1 1 0 1 1  | 7005.3468  | -0.0017 | 0.010 |         |      |
| 5: 2 1 1 0 1 1 0 0  | 7100.6875  | -0.0014 | 0.010 |         |      |
| 6: 3 2 2 0 3 0 3 0  | 7186.1321  | -0.0106 | 0.010 |         |      |
| 7: 4 2 3 0 4 0 4 0  | 7218.1642  | -0.0082 | 0.010 |         |      |
| 8: 5 2 4 0 5 0 5 0  | 7279.1347  | 0.0158  | 0.010 |         |      |
| 9: 2 1 2 0 1 1 1 0  | 6917.0151  | 0.0012  | 0.010 | 0.0008  | 0.50 |
| 10: 2 1 2 1 1 1 1 1 | 6917.0151  | 0.0004  | 0.010 | 0.0008  | 0.50 |
| 11: 2 0 2 0 1 0 1 0 | 7005.3482  | 0.0016  | 0.010 | 0.0007  | 0.50 |
| 12: 2 0 2 1 1 0 1 1 | 7005.3482  | -0.0002 | 0.010 | 0.0007  | 0.50 |
| 13: 2 1 1 0 1 1 0 0 | 7100.6825  | -0.0064 | 0.010 |         |      |
| 14: 3 2 2 0 3 0 3 0 | 7186.1321  | -0.0106 | 0.010 |         |      |
| 15: 4 2 3 0 4 0 4 0 | 7218.1618  | -0.0106 | 0.010 |         |      |
| 16: 5 2 4 0 5 0 5 0 | 7279.1432  | 0.0244  | 0.010 |         |      |
| 17: 3 1 3 0 2 1 2 0 | 10373.3425 | -0.0031 | 0.010 |         |      |
| 18: 3 0 3 0 2 0 2 0 | 10499.2285 | 0.0048  | 0.010 |         |      |
| 19: 3 2 2 0 2 2 1 0 | 10513.1606 | 0.0024  | 0.010 |         |      |
| 20: 3 2 1 0 2 2 0 0 | 10527.2463 | 0.0050  | 0.010 |         |      |
| 21: 3 1 2 0 2 1 1 0 | 10648.7744 | 0.0009  | 0.010 |         |      |
| 22: 4 1 4 0 3 1 3 0 | 13827.1864 | 0.0021  | 0.010 | 0.0041  | 0.50 |
| 23: 4 1 4 1 3 1 3 1 | 13827.1864 | 0.0061  | 0.010 | 0.0041  | 0.50 |
| 24: 4 0 4 0 3 0 3 0 | 13982.7281 | -0.0155 | 0.010 |         |      |
| 25: 4 2 3 0 3 2 2 0 | 14014.7855 | 0.0122  | 0.010 |         |      |
| 26: 4 3 2 0 3 3 1 0 | 14024.1248 | -0.0106 | 0.010 |         |      |
| 27: 4 3 1 0 3 3 0 0 | 14024.6266 | -0.0052 | 0.010 |         |      |
| 28: 4 2 2 0 3 2 1 0 | 14049.7693 | 0.0123  | 0.010 | 0.0130  | 0.50 |
| 29: 4 2 2 1 3 2 1 1 | 14049.7693 | 0.0136  | 0.010 | 0.0130  | 0.50 |
| 30: 4 1 3 1 3 1 2 1 | 14194.0110 | 0.0010  | 0.010 | -0.0067 | 0.50 |
| 31: 4 1 3 0 3 1 2 0 | 14194.0110 | -0.0145 | 0.010 | -0.0067 | 0.50 |
| 32/ 5 1 5 0 4 1 4 0 | 17277.9158 | 0.0274  | 0.010 | 0.0303  | 0.50 |
| 33: 5 1 5 1 4 1 4 1 | 17277.9158 | 0.0331  | 0.010 | 0.0303  | 0.50 |

|     |           |         |            |         |       |
|-----|-----------|---------|------------|---------|-------|
| 34/ | 5 0 5 0   | 4 0 4 0 | 17453.0393 | -0.0308 | 0.010 |
| 35/ | 5 0 5 1   | 4 0 4 1 | 17453.1552 | 0.0474  | 0.010 |
| 36/ | 5 2 4 0   | 4 2 3 0 | 17513.9781 | -0.0384 | 0.010 |
| 37: | 5 2 4 1   | 4 2 3 1 | 17514.0783 | 0.0277  | 0.010 |
| 38/ | 5 4 2 1   | 4 4 1 1 | 17529.0060 | -0.0313 | 0.010 |
| 39/ | 5 4 2 0   | 4 4 1 0 | 17529.1118 | 0.0702  | 0.010 |
| 40/ | 5 3 3 1   | 4 3 2 1 | 17532.8218 | -0.0393 | 0.010 |
| 41: | 5 3 3 0   | 4 3 2 0 | 17532.9140 | -0.0102 | 0.010 |
| 42/ | 5 3 2 1   | 4 3 1 1 | 17534.5832 | -0.0524 | 0.010 |
| 43: | 5 3 2 0   | 4 3 1 0 | 17534.6821 | 0.0262  | 0.010 |
| 44: | 5 2 3 0   | 4 2 2 0 | 17583.0556 | -0.0174 | 0.010 |
| 45: | 5 1 4 1   | 4 1 3 1 | 17735.2402 | -0.0094 | 0.010 |
| 46: | 5 1 4 0   | 4 1 3 0 | 17735.3261 | 0.0278  | 0.010 |
| 47: | 8 0 8 0   | 7 0 7 0 | 27774.3400 | -0.0313 | 0.050 |
| 48: | 8 1 8 0   | 7 1 7 0 | 27607.1200 | -0.0429 | 0.050 |
| 49: | 8 2 7 0   | 7 2 6 0 | 27991.7800 | 0.0311  | 0.050 |
| 50: | 8 2 6 0   | 7 2 5 0 | 28252.1000 | -0.0094 | 0.050 |
| 51: | 8 1 7 0   | 7 1 6 0 | 28320.8900 | -0.0319 | 0.050 |
| 52: | 9 1 9 0   | 8 1 8 0 | 31042.2200 | 0.0405  | 0.050 |
| 53: | 9 0 9 0   | 8 0 8 0 | 31189.5700 | 0.0433  | 0.050 |
| 54: | 9 2 8 0   | 8 2 7 0 | 31475.9300 | 0.0860  | 0.050 |
| 55/ | 9 3 7 1   | 8 3 6 1 | 31579.2200 | -0.1770 | 0.050 |
| 56: | 9 3 6 0   | 8 3 5 0 | 31617.1400 | -0.0843 | 0.050 |
| 57/ | 9 2 7 0   | 8 2 6 0 | 31824.8200 | 0.1897  | 0.050 |
| 58: | 9 1 8 0   | 8 1 7 0 | 31830.9600 | 0.1162  | 0.050 |
| 59: | 10 1 10 0 | 9 1 9 0 | 34473.2900 | -0.0552 | 0.050 |
| 60: | 10 0 10 0 | 9 0 9 0 | 34597.3700 | -0.0509 | 0.050 |

-----

PARAMETERS IN FIT (values truncated):

|        |          |                |   |
|--------|----------|----------------|---|
| 10099  | A /MHz   | 3544.4249(16)  | 1 |
| 20099  | B /MHz   | 1798.13881(85) | 2 |
| 30099  | C /MHz   | 1706.30123(83) | 3 |
| 299    | DJ /kHz  | 0.1645(67)     | 4 |
| 1199   | DJK /kHz | 5.760(47)      | 5 |
| 210001 | Fbc /MHz | 0.807(42)      | 6 |
| 11     | E1 /MHz  | 12431.(159)    | 7 |

MICROWAVE AVG = 0.000437 MHz, IR AVG = 0.00000  
MICROWAVE RMS = 0.049092 MHz, IR RMS = 0.00000  
END OF ITERATION 1 OLD, NEW RMS ERROR= 2.15515 2.15515

distinct frequency lines in fit: 54  
distinct parameters of fit: 7

| MICROWAVE | lines fitted | lines | lines   | RMS     | RMS ERROR | J range  | Ka range | freq.               |
|-----------|--------------|-------|---------|---------|-----------|----------|----------|---------------------|
| range     |              |       |         |         |           |          |          |                     |
|           | total        | dv=0  | dv.ne.0 | UNFITTD | e>900     |          |          |                     |
| v"= 0     | 44           | 44    | 0       | 0       | 0         | 0.045291 | 1.86718  | 1 10 0 4 6917 34597 |
| v"= 1     | 10           | 10    | 0       | 0       | 0         | 0.063063 | 3.11339  | 1 9 0 4 6917 31579  |
| -----     |              |       |         |         |           |          |          |                     |
| total:    | 54           | 54    | 0       | 0       | 0         | 0.049070 | 2.15309  |                     |

Standard errors are obtained by multiplying the previous errors by: 2.310072

PARAMETERS IN FIT WITH STANDARD ERRORS ON THOSE THAT ARE FITTED:  
(values rounded)

|        |          |               |   |
|--------|----------|---------------|---|
| 10099  | A /MHz   | 3544.4249(38) | 1 |
| 20099  | B /MHz   | 1798.1388(19) | 2 |
| 30099  | C /MHz   | 1706.3012(19) | 3 |
| 299    | DJ /kHz  | 0.165(15)     | 4 |
| 1199   | DJK /kHz | 5.76(10)      | 5 |
| 210001 | Fbc /MHz | 0.807(97)     | 6 |
| 11     | E1 /MHz  | 12431.(367)   | 7 |

CORRELATION COEFFICIENTS, C.ij:

|      | A       | B       | C       | -DJ     | -DJK    | Fbc     | E1     |
|------|---------|---------|---------|---------|---------|---------|--------|
| A    | 1.0000  |         |         |         |         |         |        |
| B    | 0.2086  | 1.0000  |         |         |         |         |        |
| C    | 0.2316  | -0.4895 | 1.0000  |         |         |         |        |
| -DJ  | -0.0268 | -0.1370 | -0.5632 | 1.0000  |         |         |        |
| -DJK | -0.6158 | -0.5149 | 0.0703  | -0.1141 | 1.0000  |         |        |
| Fbc  | 0.3874  | 0.1073  | -0.2497 | 0.3759  | -0.1335 | 1.0000  |        |
| E1   | -0.1294 | 0.1653  | 0.0525  | -0.2046 | -0.2388 | -0.5549 | 1.0000 |

Mean value of |C.ij|, i.ne.j = 0.2653

Mean value of C.ij, i.ne.j = -0.1130

No correlations with absolute value greater than 0.9950

Worst fitted lines (obs-calc/error):

|          |          |          |          |
|----------|----------|----------|----------|
| 39: 7.0  | 42: -5.2 | 35: 4.7  | 40: -3.9 |
| 36: -3.8 | 57: 3.8  | 55: -3.5 | 38: -3.1 |
| 34: -3.1 | 32: 3.0  | 46: 2.8  | 37: 2.8  |
| 43: 2.6  | 16: 2.4  | 58: 2.3  | 44: -1.7 |
| 54: 1.7  | 56: -1.7 | 8: 1.6   | 24: -1.6 |
| 28: 1.3  | 25: 1.2  | 59: -1.1 | 6: -1.1  |
| 15: -1.1 | 14: -1.1 | 26: -1.1 | 41: -1.0 |
| 60: -1.0 | 45: -0.9 | 53: 0.9  | 48: -0.9 |
| 7: -0.8  | 52: 0.8  | 30: -0.7 | 13: -0.6 |
| 51: -0.6 | 47: -0.6 | 49: 0.6  | 27: -0.5 |
| 20: 0.5  | 18: 0.5  | 2: 0.4   | 22: 0.4  |
| 17: -0.3 | 1: 0.3   | 19: 0.2  | 50: -0.2 |
| 4: -0.2  | 5: -0.1  |          |          |

|                     |            |         |                   |
|---------------------|------------|---------|-------------------|
| 39/ 5 4 2 0 4 4 1 0 | 17529.1118 | 0.0702  | 0.010             |
| 42/ 5 3 2 1 4 3 1 1 | 17534.5832 | -0.0524 | 0.010             |
| 35/ 5 0 5 1 4 0 4 1 | 17453.1552 | 0.0474  | 0.010             |
| 40/ 5 3 3 1 4 3 2 1 | 17532.8218 | -0.0393 | 0.010             |
| 36/ 5 2 4 0 4 2 3 0 | 17513.9781 | -0.0384 | 0.010             |
| 57/ 9 2 7 0 8 2 6 0 | 31824.8200 | 0.1897  | 0.050             |
| 55/ 9 3 7 1 8 3 6 1 | 31579.2200 | -0.1770 | 0.050             |
| 38/ 5 4 2 1 4 4 1 1 | 17529.0060 | -0.0313 | 0.010             |
| 34/ 5 0 5 0 4 0 4 0 | 17453.0393 | -0.0308 | 0.010             |
| 32/ 5 1 5 0 4 1 4 0 | 17277.9158 | 0.0274  | 0.010 0.0303 0.50 |

---

/ SPFIT output reformatted with PIFORM

---



---

KRA - SINGLE ISOTOPIC SUBSTITUTION - Various permutations  
of Kraitchman's equations for symmetric/asymmetric tops

---

version 27.XI.2013

Zbigniew KISIEL

-----  
11dfscp3ene  
-----

parent species

Planar calculation will be made from I.a and I.b

-----  
Si-29  
-----

The parent species:

|               |              |               |               |
|---------------|--------------|---------------|---------------|
| X, Y, Z =     | 3544.4280000 | 1798.13910000 | 1706.30130000 |
| eX, eY, eZ =  | 0.00350000   | 0.00230000    | 0.00250000    |
| IX, IY, IZ =  | 142.58407986 | 281.05667965  | 296.18391840  |
| eIX,eIY,eIZ = | 0.00014080   | 0.00035950    | 0.00043396    |
| PX, PY, PZ =  | 217.32825910 | 78.85565930   | 63.72842056   |

Mass = 120.02068630

The isotopic species:

|               |               |               |               |
|---------------|---------------|---------------|---------------|
| X, Y, Z =     | 3543.45000000 | 1796.32400000 | 1704.67800000 |
| eX, eY, eZ =  | 0.47000000    | 0.00360000    | 0.00360000    |
| IX, IY, IZ =  | 142.62343338  | 281.34067407  | 296.46596307  |
| eIX,eIY,eIZ = | 0.01891744    | 0.00056383    | 0.00062609    |
| PX, PY, PZ =  | 217.59160188  | 78.87436119   | 63.74907218   |

Mass change = 0.99956780

Total mass = 121.02025410

M DM/(M+DM) = 0.99131186

#### KRAITCHMAN RESULTS:

a                    b

PLANAR:        0.53517 +- 0.00063    0.19945 +- 0.04794

+Costain err.    0.53517 +- 0.00287    0.19945 +- 0.04853

a                    b                    c

NONPLANAR:    0.51534 +- 0.00927    0.13739 +- 0.03479    0.14455 +- 0.03315

+Costain err.    0.51534 +- 0.00971    0.13739 +- 0.03647    0.14455 +- 0.03474

R= 0.55258 +- 0.01571

DIX,DIY,DIZ =        0.03935352        0.28399441        0.28204468

DPX,DPY,DPZ =        0.26334278        0.01870189        0.02065163

IXY,IXZ,IYZ =        -138.47259980        -153.59983854        -15.12723874

-----

Si-30

---

The parent species:

|               |              |               |               |
|---------------|--------------|---------------|---------------|
| X, Y, Z =     | 3544.4280000 | 1798.13910000 | 1706.30130000 |
| eX, eY, eZ =  | 0.00350000   | 0.00230000    | 0.00250000    |
| IX, IY, IZ =  | 142.58407986 | 281.05667965  | 296.18391840  |
| eIX,eIY,eIZ = | 0.00014080   | 0.00035950    | 0.00043396    |
| PX, PY, PZ =  | 217.32825910 | 78.85565930   | 63.72842056   |

Mass = 120.02068630

The isotopic species:

|               |              |               |               |
|---------------|--------------|---------------|---------------|
| X, Y, Z =     | 3544.4100000 | 1794.55290000 | 1703.07450000 |
| eX, eY, eZ =  | 0.37000000   | 0.00250000    | 0.00240000    |
| IX, IY, IZ =  | 142.58480396 | 281.61833792  | 296.74509541  |
| eIX,eIY,eIZ = | 0.01488439   | 0.00039232    | 0.00041818    |
| PX, PY, PZ =  | 217.88931469 | 78.85578073   | 63.72902323   |

Mass change = 1.99684360

Total mass = 122.01752990

M DM/(M+DM) = 1.96416482

KRAITCHMAN RESULTS:

a                      b

PLANAR:      0.53474 +- 0.00025    0.01924 +- 0.19775

+Costain err. 0.53474 +- 0.00282 0.01924 +- 0.21256

a b c

NONPLANAR: 0.53446 +- 0.00355 0.00788 +- 0.24179 0.01755 +- 0.10851

+Costain err. 0.53446 +- 0.00453 0.00788 +- 0.30776 0.01755 +- 0.13814

R= 0.53480 +- 0.00785

|               |               |               |              |
|---------------|---------------|---------------|--------------|
| DIX,DIY,DIZ = | 0.00072410    | 0.56165826    | 0.56117702   |
| DPX,DPY,DPZ = | 0.56105559    | 0.00012143    | 0.00060267   |
| IXY,IXZ,IYZ = | -138.47259980 | -153.59983854 | -15.12723874 |

-----  
C-13 1/4  
-----

The parent species:

|               |               |               |               |
|---------------|---------------|---------------|---------------|
| X, Y, Z =     | 3544.42800000 | 1798.13910000 | 1706.30130000 |
| eX, eY, eZ =  | 0.00350000    | 0.00230000    | 0.00250000    |
| IX, IY, IZ =  | 142.58407986  | 281.05667965  | 296.18391840  |
| eIX,eIY,eIZ = | 0.00014080    | 0.00035950    | 0.00043396    |
| PX, PY, PZ =  | 217.32825910  | 78.85565930   | 63.72842056   |

Mass = 120.02068630

The isotopic species:

|           |               |               |               |
|-----------|---------------|---------------|---------------|
| X, Y, Z = | 3494.65000000 | 1795.31270000 | 1692.45100000 |
|-----------|---------------|---------------|---------------|

eX, eY, eZ = 0.29000000 0.00220000 0.00220000  
 IX, IY, IZ = 144.61505587 281.49915332 298.60776176  
 eIX,eIY,eIZ = 0.01200073 0.00034495 0.00038816  
 PX, PY, PZ = 217.74592961 80.86183215 63.75322372

Mass change = 1.00335484

Total mass = 121.02404114

M DM/(M+DM) = 0.99503648

KRAITCHMAN RESULTS:

a b

PLANAR: 0.66194 +- 0.00037 1.43095 +- 0.00423

+Costain err. 0.66194 +- 0.00230 1.43095 +- 0.00436

a b c

NONPLANAR: 0.64312 +- 0.00463 1.42090 +- 0.00215 0.16825 +- 0.02039

+Costain err. 0.64312 +- 0.00518 1.42090 +- 0.00239 0.16825 +- 0.02226

R= 1.56871 +- 0.00386

DIX,DIY,DIZ = 2.03097601 0.44247367 2.42384336

DPX,DPY,DPZ = 0.41767051 2.00617285 0.02480316

IXY,IXZ,IYZ = -138.47259980 -153.59983854 -15.12723874

-----  
 C-13 2/3  
 -----

The parent species:

|               |               |               |               |
|---------------|---------------|---------------|---------------|
| X, Y, Z =     | 3544.42800000 | 1798.13910000 | 1706.30130000 |
| eX, eY, eZ =  | 0.00350000    | 0.00230000    | 0.00250000    |
| IX, IY, IZ =  | 142.58407986  | 281.05667965  | 296.18391840  |
| eIX,eIY,eIZ = | 0.00014080    | 0.00035950    | 0.00043396    |
| PX, PY, PZ =  | 217.32825910  | 78.85565930   | 63.72842056   |

Mass = 120.02068630

The isotopic species:

|               |               |               |               |
|---------------|---------------|---------------|---------------|
| X, Y, Z =     | 3533.34000000 | 1773.21460000 | 1681.42020000 |
| eX, eY, eZ =  | 0.33000000    | 0.00220000    | 0.00200000    |
| IX, IY, IZ =  | 143.03152400  | 285.00724334  | 300.56675006  |
| eIX,eIY,eIZ = | 0.01335858    | 0.00035360    | 0.00035752    |
| PX, PY, PZ =  | 221.27123470  | 79.29551536   | 63.73600864   |

Mass change = 1.00335484

Total mass = 121.02404114

M DM/(M+DM) = 0.99503648

KRAITCHMAN RESULTS:

a                      b

PLANAR:            1.98933 +- 0.00016    0.68008 +- 0.01015  
+Costain err.      1.98933 +- 0.00077    0.68008 +- 0.01039

a                      b                      c

NONPLANAR:      1.98743 +- 0.00169   0.67410 +- 0.00513   0.08972 +- 0.03955

+Costain err.    1.98743 +- 0.00185   0.67410 +- 0.00559   0.08972 +- 0.04294

R= 2.10055 +- 0.00311

DIX,DIY,DIZ =      0.44744414      3.95056369      4.38283166

DPX,DPY,DPZ =      3.94297561      0.43985606      0.00758808

IXY,IXZ,IYZ =    -138.47259980    -153.59983854    -15.12723874

-----

---

|                                                      |
|------------------------------------------------------|
| E V A L - Internals and their errors from Cartesians |
|------------------------------------------------------|

version 19.VI.2017

Zbigniew KISIEL

**WARNING:**

The EVAL uncertainties are evaluated by assuming that the correlation matrix is a unit matrix.

The EVAL uncertainties may thus differ significantly (but typically by not more than 30% either way) from uncertainties in explicitly fitted internals corresponding to the input Cartesians.

! 11dfscp3ene Si-29

!

INPUT CARTESIANS:

|       |          |         |          |         |          |         |
|-------|----------|---------|----------|---------|----------|---------|
| Si-29 | 0.51534  | 0.00971 | 0.13739  | 0.03647 | 0.14455  | 0.03474 |
| C(1)  | -1.98743 | 0.00185 | 0.67410  | 0.00559 | -0.08972 | 0.04294 |
| C(2)  | -1.98743 | 0.00185 | -0.67410 | 0.00559 | -0.08972 | 0.04294 |
| C(3)  | -0.64312 | 0.00518 | -1.42090 | 0.00239 | 0.16825  | 0.02226 |
| C(4)  | -0.64312 | 0.00518 | 1.42090  | 0.00239 | 0.16825  | 0.02226 |

CALCULATED INTERNALS:

!

! Bond Lengths

!

Si-29 C(3) = 1.94187 +- 0.03006

Si-29 C(4) = 1.72916 +- 0.02811

C(1) C(4) = 1.55930 +- 0.00974

C(1) C(2) = 1.34820 +- 0.00791

C(2) C(3) = 1.55930 +- 0.00974

!

! Bond Angles

!

C(3) Si-29 C(4) = 101.29202 +- 0.53388

Si-29 C(4) C(1) = 102.69831 +- 0.90228

C(4) C(1) C(2) = 118.61565 +- 0.65041

C(1) C(2) C(3) = 118.61565 +- 0.65038

C(2) C(3) Si-29 = 97.35222 +- 0.74091



!

! Dihedral Angles

!

Si-29 C(4) C(1) C(2) = 8.23438 +- 4.22980

C(4) C(1) C(2) C(3) = 0.00000 +- 5.41973

C(1) C(2) C(3) Si-29 = -7.20653 +- 4.02348

C(2) C(3) Si-29 C(4) = 10.63523 +- 2.52151

C(3) Si-29 C(4) C(1) = -10.81436 +- 2.57351

-----

---

|                                                      |
|------------------------------------------------------|
| E V A L - Internals and their errors from Cartesians |
|------------------------------------------------------|

version 19.VI.2017

Zbigniew KISIEL

WARNING:

The EVAL uncertainties are evaluated by assuming that the correlation matrix is a unit matrix.

The EVAL uncertainties may thus differ significantly (but typically by not more than 30% either way) from uncertainties in explicitly fitted internals corresponding to the input Cartesians.

! 11dfscp3ene Si-30

!

INPUT CARTESIANS:

|       |          |         |          |         |          |         |
|-------|----------|---------|----------|---------|----------|---------|
| Si-30 | 0.53446  | 0.00453 | 0.00788  | 0.30776 | 0.01755  | 0.13814 |
| C(1)  | -1.98743 | 0.00185 | 0.67410  | 0.00559 | -0.08972 | 0.04294 |
| C(2)  | -1.98743 | 0.00185 | -0.67410 | 0.00559 | -0.08972 | 0.04294 |
| C(3)  | -0.64312 | 0.00518 | -1.42090 | 0.00239 | 0.16825  | 0.02226 |
| C(4)  | -0.64312 | 0.00518 | 1.42090  | 0.00239 | 0.16825  | 0.02226 |

CALCULATED INTERNALS:

!

! Bond Lengths

!

$$\text{Si-30 C(3)} = 1.85764 \pm 0.23706$$

$$\text{Si-30 C(4)} = 1.84554 \pm 0.23592$$

$$\text{C(1) C(4)} = 1.55930 \pm 0.00974$$

$$\text{C(1) C(2)} = 1.34820 \pm 0.00791$$

$$\text{C(2) C(3)} = 1.55930 \pm 0.00974$$

!

! Bond Angles

!

$$\text{C(3) Si-30 C(4)} = 100.24043 \pm 0.88606$$

$$\text{Si-30 C(4) C(1)} = 99.78163 \pm 5.96991$$

$$\text{C(4) C(1) C(2)} = 118.61565 \pm 0.65041$$

$$\text{C(1) C(2) C(3)} = 118.61565 \pm 0.65038$$

$$\text{C(2) C(3) Si-30} = 99.48121 \pm 5.88851$$

!

! Dihedral Angles

!

$$\text{Si-30 C(4) C(1) C(2)} = 11.73582 \pm 6.07476$$

$$C(4) C(1) C(2) C(3) = 0.00000 \pm 5.41973$$

$$C(1) C(2) C(3) \text{ Si-30} = -11.64782 \pm 6.03921$$

$$C(2) C(3) \text{ Si-30} C(4) = 16.10069 \pm 6.13063$$

$$C(3) \text{ Si-30} C(4) C(1) = -16.11541 \pm 6.13581$$

---
